# Supplementary material for: Extracellular matrix analysis of fibrosis: A step towards tissue engineering for urethral stricture disease
Source: PLoS One. 2023 Nov 30;18(11):e0294955. doi: 10.1371/journal.pone.0294955 (PMC10688748; doi:10.1371/journal.pone.0294955)
Supplement: S2 File — (XLSX) [file pone.0294955.s005.xlsx]

## Sheet: sample explanation
origin	In LFQ selection
gender conformation surgery	H1	healthy
gender conformation surgery	H2	healthy
gender conformation surgery	H3	healthy
urethral reconstruction EPA for USD	SF1	(spongio)fibrosis
urethral reconstruction EPA for USD	SF2	(spongio)fibrosis
urethral reconstruction EPA for USD	SF3	(spongio)fibrosis

## Sheet: proteinGroups
Protein IDs	Majority protein IDs	Peptide counts (all)	Peptide counts (razor+unique)	Peptide counts (unique)	Protein names	Gene names	Fasta headers	division	category	LFQ sum all exp	LFQ intensity H1	LFQ intensity H2	LFQ intensity H3	LFQ intensity SF1	LFQ intensity SF2	LFQ intensity SF3		MS/MS count exp 147	MS/MS count exp 150	MS/MS count exp 1-84	MS/MS count exp 1-92	MS/MS count exp 255 normaal	MS/MS count exp 255 ziek	MS/MS count exp 693 normaal	MS/MS count exp 693 ziek	MS/MS count	Only identified by site	Reverse	Potential contaminant	id	Peptide IDs	Peptide is razor	Mod. peptide IDs	Evidence IDs	MS/MS IDs	Best MS/MS	Oxidation (M) site IDs	Oxidation (M) site positions
B8ZZL8;P61604;S4R3N1;B8ZZ54	B8ZZL8;P61604;S4R3N1	3;3;2;1	3;3;2;1	3;3;2;1	10 kDa heat shock protein, mitochondrial	HSPE1;HSPE1-MOB4	Isoform of P61604, 10 kDa heat shock protein, mitochondrial;10 kDa heat shock protein, mitochondrial;Protein HSPE1-MOB4	non matrisome	non matrisome	232320000	0	95020000	0	137300000	0	0		1	7	5	8	3	2	0	2	28				198	2505;2946;8165	True;True;True	2654;3138;8744	30030;30031;30032;30033;30034;30035;30036;30037;30038;30039;30040;30041;30042;30043;36968;99951;99952;99953;99954;99955;99956;99957;99958;99959;99960;99961;99962;99963	32088;32089;32090;32091;32092;32093;32094;32095;32096;32097;32098;32099;32100;32101;39570;106439;106440;106441;106442;106443;106444;106445;106446;106447;106448;106449;106450;106451	32090;39570;106450
Q15029-2;Q15029-3;Q15029;K7EJ74;K7EP67	Q15029-2;Q15029-3;Q15029;K7EJ74;K7EP67	4;4;4;2;2	3;3;3;1;1	3;3;3;1;1	116 kDa U5 small nuclear ribonucleoprotein component	EFTUD2	Isoform of Q15029, Isoform 2 of 116 kDa U5 small nuclear ribonucleoprotein component;Isoform of Q15029, Isoform 3 of 116 kDa U5 small nuclear ribonucleoprotein component;116 kDa U5 small nuclear ribonucleoprotein component;Isoform of Q15029, 116 kDa U5 sma	non matrisome	non matrisome	4401800	0	4401800	0	0	0	0		0	2	0	1	0	0	0	0	3				1069	1944;2540;2953;8528	True;True;False;True	2054;2692;3146;9133	23734;23735;30353;37108;37109;104601	25430;25431;32419;39738;39739;111350	25431;32419;39739;111350
P31946-2;P31946	P31946-2;P31946	3;3	1;1	1;1	14-3-3 protein beta/alpha;14-3-3 protein beta/alpha, N-terminally processed	YWHAB	Isoform of P31946, Isoform Short of 14-3-3 protein beta/alpha;14-3-3 protein beta/alpha	non matrisome	non matrisome	2511800	0	2511800	0	0	0	0		0	0	0	0	0	0	0	0	0	+			831	1610;5570;8766	False;False;True	1704;1705;5983;9376	20224;20225;20226;20227;20228;20229;20230;20231;20232;20233;20234;20235;20236;20237;20238;20239;20240;20241;20242;20243;20244;20245;20246;20247;20248;70159;70160;70161;70162;70163;70164;70165;70166;70167;70168;70169;107225	21722;21723;21724;21725;21726;21727;21728;21729;21730;21731;21732;21733;21734;21735;21736;21737;21738;21739;21740;21741;21742;21743;21744;21745;21746;74790;74791;74792;74793;74794;74795;74796;74797;74798;74799;74800;114096	21727;74799;114096	423	218
P62258;P62258-2;B4DJF2;I3L3T1;K7EM20;K7EIT4;I3L0W5	P62258;P62258-2	9;7;4;4;4;3;1	9;7;4;4;4;3;1	7;5;3;3;3;2;1	14-3-3 protein epsilon	YWHAE	14-3-3 protein epsilon;Isoform of P62258, Isoform SV of 14-3-3 protein epsilon	non matrisome	non matrisome	815937000	0	261030000	236700000	215550000	47411000	55246000		1	20	10	17	8	6	2	4	68				948	26;1610;1730;3874;4298;4615;5282;5570;8740	True;True;True;True;True;True;True;True;True	27;1704;1705;1835;4123;4571;4904;5619;5620;5983;9350	210;211;212;213;214;20224;20225;20226;20227;20228;20229;20230;20231;20232;20233;20234;20235;20236;20237;20238;20239;20240;20241;20242;20243;20244;20245;20246;20247;20248;21750;21751;21752;50641;50642;50643;50644;50645;50646;50647;50648;50649;50650;50651;50652;50653;55113;58727;58728;58729;58730;58731;58732;58733;58734;58735;66437;66438;66439;66440;70159;70160;70161;70162;70163;70164;70165;70166;7…	216;217;218;219;220;21722;21723;21724;21725;21726;21727;21728;21729;21730;21731;21732;21733;21734;21735;21736;21737;21738;21739;21740;21741;21742;21743;21744;21745;21746;23314;23315;23316;54230;54231;54232;54233;54234;54235;54236;54237;54238;54239;54240;54241;54242;58947;62750;62751;62752;62753;62754;62755;62756;62757;62758;70813;70814;70815;70816;74790;74791;74792;74793;74794;74795;74796;74797;7…	217;21727;23314;54239;58947;62755;70814;74799;113749	423;542	1;221
P61981	P61981	3	1	1	14-3-3 protein gamma;14-3-3 protein gamma, N-terminally processed	YWHAG	14-3-3 protein gamma	non matrisome	non matrisome	6248300	0	6248300	0	0	0	0		0	2	0	0	0	0	0	0	2				943	1610;5570;7215	False;False;True	1704;1705;5983;7735	20224;20225;20226;20227;20228;20229;20230;20231;20232;20233;20234;20235;20236;20237;20238;20239;20240;20241;20242;20243;20244;20245;20246;20247;20248;70159;70160;70161;70162;70163;70164;70165;70166;70167;70168;70169;89254;89255	21722;21723;21724;21725;21726;21727;21728;21729;21730;21731;21732;21733;21734;21735;21736;21737;21738;21739;21740;21741;21742;21743;21744;21745;21746;74790;74791;74792;74793;74794;74795;74796;74797;74798;74799;74800;95056;95057	21727;74799;95057	423	223
P31947-2;P31947;Q04917;Q4VY20;A0A0J9YWZ2;Q4VY19;A0A0J9YWE8;A2IDB2	P31947-2;P31947;Q04917	4;4;2;1;1;1;1;1	2;2;0;0;0;0;0;0	2;2;0;0;0;0;0;0	14-3-3 protein sigma;14-3-3 protein eta	SFN;YWHAH	Isoform of P31947, Isoform 2 of 14-3-3 protein sigma;14-3-3 protein sigma;14-3-3 protein eta	non matrisome	non matrisome	34675000	0	34675000	0	0	0	0		0	3	2	2	2	2	1	3	15				832	1610;5570;6653;8177	False;False;True;True	1704;1705;5983;7142;8757	20224;20225;20226;20227;20228;20229;20230;20231;20232;20233;20234;20235;20236;20237;20238;20239;20240;20241;20242;20243;20244;20245;20246;20247;20248;70159;70160;70161;70162;70163;70164;70165;70166;70167;70168;70169;82841;100024;100025;100026;100027;100028;100029;100030;100031;100032;100033;100034;100035;100036;100037	21722;21723;21724;21725;21726;21727;21728;21729;21730;21731;21732;21733;21734;21735;21736;21737;21738;21739;21740;21741;21742;21743;21744;21745;21746;74790;74791;74792;74793;74794;74795;74796;74797;74798;74799;74800;88234;106513;106514;106515;106516;106517;106518;106519;106520;106521;106522;106523;106524;106525;106526	21727;74799;88234;106519	423	188
P27348;E9PG15	P27348;E9PG15	5;3	3;2	3;2	14-3-3 protein theta	YWHAQ	14-3-3 protein theta;Isoform of P27348, 14-3-3 protein theta (Fragment)	non matrisome	non matrisome	16850000	0	0	0	0	0	16850000		0	7	1	3	2	0	0	3	16				802	830;1610;5570;6841;7216	True;False;False;True;True	872;1704;1705;5983;7339;7736	9217;9218;9219;9220;9221;9222;9223;9224;20224;20225;20226;20227;20228;20229;20230;20231;20232;20233;20234;20235;20236;20237;20238;20239;20240;20241;20242;20243;20244;20245;20246;20247;20248;70159;70160;70161;70162;70163;70164;70165;70166;70167;70168;70169;84456;84457;84458;84459;84460;84461;84462;89256;89257	9712;9713;9714;9715;9716;9717;9718;9719;21722;21723;21724;21725;21726;21727;21728;21729;21730;21731;21732;21733;21734;21735;21736;21737;21738;21739;21740;21741;21742;21743;21744;21745;21746;74790;74791;74792;74793;74794;74795;74796;74797;74798;74799;74800;89977;89978;89979;89980;89981;89982;89983;95058;95059	9717;21727;74799;89978;95059	423	218
P63104;E7EX29;B0AZS6;B7Z2E6;H0YB80;E7ESK7;P63104-2;E5RIR4;E9PD24;E7EVZ2;E5RGE1	P63104;E7EX29;B0AZS6;B7Z2E6;H0YB80;E7ESK7;P63104-2	8;7;5;4;4;4;4;3;3;3;2	6;5;4;3;3;3;3;2;2;2;1	6;5;4;3;3;3;3;2;2;2;1	14-3-3 protein zeta/delta	YWHAZ	14-3-3 protein zeta/delta;Isoform of P63104, 14-3-3 protein zeta/delta (Fragment);Isoform of P63104, 14-3-3 protein zeta/delta;Isoform of P63104, 14-3-3 protein zeta/delta;Isoform of P63104, 14-3-3 protein zeta/delta (Fragment);Isoform of P63104, 14-3-3 pr	non matrisome	non matrisome	64814000	0	35853000	0	28961000	0	0		0	7	2	5	2	2	0	2	20				973	1370;1610;3028;5570;7173;7217;8510;8741	True;False;True;False;True;True;True;True	1449;1704;1705;3222;5983;7685;7737;9115;9351	17332;17333;17334;17335;17336;20224;20225;20226;20227;20228;20229;20230;20231;20232;20233;20234;20235;20236;20237;20238;20239;20240;20241;20242;20243;20244;20245;20246;20247;20248;37957;37958;37959;70159;70160;70161;70162;70163;70164;70165;70166;70167;70168;70169;88486;88487;88488;88489;89258;104436;104437;104438;106886;106887;106888	18547;18548;18549;18550;18551;21722;21723;21724;21725;21726;21727;21728;21729;21730;21731;21732;21733;21734;21735;21736;21737;21738;21739;21740;21741;21742;21743;21744;21745;21746;40630;40631;40632;74790;74791;74792;74793;74794;74795;74796;74797;74798;74799;74800;94239;94240;94241;94242;94243;95060;111178;111179;111180;113750;113751;113752	18548;21727;40630;74799;94243;95060;111178;113750	423	218
Q99943	Q99943	2	2	2	1-acyl-sn-glycerol-3-phosphate acyltransferase alpha	AGPAT1	1-acyl-sn-glycerol-3-phosphate acyltransferase alpha	non matrisome	non matrisome	7902900	0	7902900	0	0	0	0		0	2	0	0	0	2	0	0	4				1194	2637;7375	True;True	2800;7907	31628;31629;90809;90810	33756;33757;96718;96719	33756;96718
C9JLS9;P35998	C9JLS9;P35998	1;1	1;1	1;1	26S protease regulatory subunit 7	PSMC2	Isoform of P35998, 26S protease regulatory subunit 7 (Fragment);26S protease regulatory subunit 7	non matrisome	non matrisome	2914200	0	0	0	2914200	0	0		0	0	0	1	0	0	0	0	1				220	427	TRUE	448	4593	4845	4845
Q13442	Q13442	1	1	1	28 kDa heat- and acid-stable phosphoprotein	PDAP1	28 kDa heat- and acid-stable phosphoprotein	non matrisome	non matrisome	4574600	0	0	0	4574600	0	0		0	0	0	1	0	0	0	0	1				1048	3363	TRUE	3577	44124	47223	47223
A0A0D9SFS3;E9PDF2;E9PCR7;Q9ULD0;Q02218-2;Q02218;C9J4G7;E9PFG7;Q02218-3;Q9ULD0-3;Q9ULD0-2	A0A0D9SFS3;E9PDF2;E9PCR7;Q9ULD0;Q02218-2;Q02218;C9J4G7;E9PFG7;Q02218-3;Q9ULD0-3;Q9ULD0-2	2;2;2;2;2;2;1;1;1;1;1	2;2;2;2;2;2;1;1;1;1;1	2;2;2;2;2;2;1;1;1;1;1	2-oxoglutarate dehydrogenase-like, mitochondrial;2-oxoglutarate dehydrogenase, mitochondrial	OGDH;OGDHL	Isoform of Q02218, 2-oxoglutarate dehydrogenase, mitochondrial;Isoform of Q02218, 2-oxoglutarate dehydrogenase, mitochondrial;Isoform of Q02218, 2-oxoglutarate dehydrogenase, mitochondrial;2-oxoglutarate dehydrogenase-like, mitochondrial;Isoform of Q02218,	non matrisome	non matrisome	3222900	0	0	0	0	0	3222900		1	2	0	2	1	1	0	1	8				113	5128;5868	True;True	5449;6303	64452;73818;73819;73820;73821;73822;73823;73824	68709;78657;78658;78659;78660;78661;78662;78663	68709;78659
D6R9P2;Q9BUT1-3;Q9BUT1	D6R9P2;Q9BUT1-3;Q9BUT1	1;1;1	1;1;1	1;1;1	3-hydroxybutyrate dehydrogenase type 2	SLC9B2;BDH2	Isoform of Q86UD5, Mitochondrial sodium/hydrogen exchanger 9B2;Isoform of Q9BUT1, Isoform 3 of 3-hydroxybutyrate dehydrogenase type 2;3-hydroxybutyrate dehydrogenase type 2	non matrisome	non matrisome	6351900	6351900	0	0	0	0	0		1	0	0	0	0	0	0	0	1				268	7137	TRUE	7647	87931	93623	93623
F6U211;S4R435;P46783	F6U211;S4R435;P46783	1;1;1	1;1;1	1;1;1	40S ribosomal protein S10	RPS10;RPS10-NUDT3	Isoform of P46783, 40S ribosomal protein S10;Protein RPS10-NUDT3 (Fragment);40S ribosomal protein S10	non matrisome	non matrisome	0	0	0	0	0	0	0		1	2	2	2	2	1	0	0	10				361	3640	TRUE	3875	47798;47799;47800;47801;47802;47803;47804;47805;47806;47807	51217;51218;51219;51220;51221;51222;51223;51224;51225;51226	51226
P62280;M0QZC5;M0R1H5;M0R1H6	P62280;M0QZC5;M0R1H5;M0R1H6	4;3;2;2	4;3;2;2	4;3;2;2	40S ribosomal protein S11	RPS11	40S ribosomal protein S11;Isoform of P62280, 40S ribosomal protein S11;Isoform of P62280, 40S ribosomal protein S11;Isoform of P62280, 40S ribosomal protein S11	non matrisome	non matrisome	83124000	0	31435000	0	35872000	15817000	0		0	5	1	5	2	4	0	0	17				953	133;1691;6355;6594	True;True;True;True	140;1791;6827;7080	1408;21147;21148;21149;21150;21151;21152;21153;21154;79619;79620;79621;82151;82152;82153;82154;82155	1480;22673;22674;22675;22676;22677;22678;22679;22680;84791;84792;84793;87475;87476;87477;87478;87479	1480;22677;84793;87479
P25398	P25398	3	3	3	40S ribosomal protein S12	RPS12	40S ribosomal protein S12	non matrisome	non matrisome	51773000	0	31569000	0	20204000	0	0		0	8	2	4	1	0	0	0	15				793	1681;4539;5127	True;True;True	1781;4824;5448	21076;57697;57698;57699;57700;57701;57702;64445;64446;64447;64448;64449;64450;64451	22602;61667;61668;61669;61670;61671;61672;68701;68702;68703;68704;68705;68706;68707;68708	22602;61669;68703
P62277;J3KMX5	P62277;J3KMX5	3;2	3;2	3;2	40S ribosomal protein S13	RPS13	40S ribosomal protein S13;Isoform of P62277, 40S ribosomal protein S13	non matrisome	non matrisome	189558000	40042000	74216000	0	75300000	0	0		2	10	2	9	3	3	1	0	30				952	3047;3110;4631	True;True;True	3241;3305;4920	38073;38074;38075;38076;38077;38078;38079;39004;39005;39006;39007;39008;39009;39010;39011;39012;58830;58831;58832;58833;58834;58835;58836;58837;58838;58839;58840;58841;58842;58843	40749;40750;40751;40752;40753;40754;40755;41737;41738;41739;41740;41741;41742;41743;41744;41745;62853;62854;62855;62856;62857;62858;62859;62860;62861;62862;62863;62864;62865;62866	40750;41740;62863
P62263;H0YB22;E5RH77	P62263;H0YB22;E5RH77	4;2;2	4;2;2	4;2;2	40S ribosomal protein S14	RPS14	40S ribosomal protein S14;Isoform of P62263, 40S ribosomal protein S14 (Fragment);Isoform of P62263, 40S ribosomal protein S14	non matrisome	non matrisome	14380000	0	0	0	14380000	0	0		0	4	1	6	0	0	0	0	11				949	148;3714;3819;7572	True;True;True;True	158;3949;4063;8122	1547;1548;48475;49950;49951;49952;49953;49954;93119;93120	1623;1624;51928;51929;53501;53502;53503;53504;53505;99215;99216	1623;51929;53505;99216
I3L3P7;P62244;I3L246;H3BN98;H3BV27;H3BT37;I3L303;H3BVC7	I3L3P7;P62244;I3L246;H3BN98	5;5;3;3;1;1;1;1	5;5;3;3;1;1;1;1	5;5;3;3;1;1;1;1	40S ribosomal protein S15a	RPS15A	Isoform of P62244, 40S ribosomal protein S15a;40S ribosomal protein S15a;Isoform of P62244, 40S ribosomal protein S15a;Uncharacterized protein (Fragment)	non matrisome	non matrisome	137063000	0	45111000	0	43954000	34942000	13056000		1	2	2	9	6	5	5	3	33				447	967;2514;3506;4191;8599	True;True;True;True;True	1020;2663;2664;3729;4460;9204	11499;11500;11501;11502;11503;11504;11505;11506;30106;30107;30108;30109;30110;30111;30112;46083;46084;46085;46086;54169;54170;54171;54172;54173;54174;54175;54176;54177;54178;54179;54180;54181;105286	12154;12155;12156;12157;12158;12159;12160;12161;32165;32166;32167;32168;32169;32170;32171;49382;49383;49384;49385;57959;57960;57961;57962;57963;57964;57965;57966;57967;57968;57969;57970;57971;112055	12160;32165;49385;57966;112055
P62249;M0R210;M0R3H0;A0A087WZ27;M0R1M5;M0QX76;Q6IPX4	P62249;M0R210;M0R3H0;A0A087WZ27;M0R1M5;M0QX76;Q6IPX4	8;7;6;6;5;4;4	8;7;6;6;5;4;4	8;7;6;6;5;4;4	40S ribosomal protein S16	RPS16;ZNF90	40S ribosomal protein S16;Isoform of P62249, 40S ribosomal protein S16;Isoform of P62249, 40S ribosomal protein S16;Isoform of Q03938, Zinc finger protein 90;Isoform of P62249, 40S ribosomal protein S16 (Fragment);Isoform of P62249, 40S ribosomal protein S	non matrisome	non matrisome	358440000	0	112340000	0	148360000	97740000	0		1	12	5	16	12	10	4	3	63				947	526;1388;2341;2952;3187;4690;7489;8220	True;True;True;True;True;True;True;True	551;1467;2475;3145;3391;4980;8025;8809	5653;5654;5655;5656;5657;17480;17481;17482;17483;28085;28086;28087;28088;28089;28090;28091;28092;28093;28094;28095;28096;28097;28098;28099;28100;37097;37098;37099;37100;37101;37102;37103;37104;37105;37106;37107;41010;41011;41012;41013;59261;59262;59263;59264;59265;59266;59267;59268;59269;59270;59271;59272;59273;59274;59275;59276;59277;59278;59279;59280;59281;59282;59283;92067;92068;92069;92070;10…	5950;5951;5952;5953;5954;18700;18701;18702;18703;30018;30019;30020;30021;30022;30023;30024;30025;30026;30027;30028;30029;30030;30031;30032;30033;39727;39728;39729;39730;39731;39732;39733;39734;39735;39736;39737;43828;43829;43830;43831;63297;63298;63299;63300;63301;63302;63303;63304;63305;63306;63307;63308;63309;63310;63311;63312;63313;63314;63315;63316;63317;63318;63319;98097;98098;98099;98100;10…	5954;18701;30021;39730;43829;63317;98097;107136
P62269;A0A0G2JQH2;Q5GGW2;J3JS69	P62269	5;2;2;1	5;2;2;1	5;2;2;1	40S ribosomal protein S18	RPS18	40S ribosomal protein S18	non matrisome	non matrisome	127330000	0	60810000	0	66520000	0	0		0	10	2	12	1	1	0	0	26				951	130;3632;3982;8082;8160	True;True;True;True;True	137;3867;4237;8659;8660;8739	1403;1404;1405;47702;47703;47704;47705;47706;47707;47708;47709;51812;51813;51814;51815;51816;51817;99049;99050;99051;99052;99937;99938;99939;99940	1475;1476;1477;51118;51119;51120;51121;51122;51123;51124;51125;55470;55471;55472;55473;55474;55475;105499;105500;105501;105502;105503;106425;106426;106427;106428	1476;51119;55472;105499;106426	543	71
P39019;A0A075B6E2;M0R2L9;M0QXK4;M0QYF7;M0R140	P39019;A0A075B6E2	5;3;2;2;2;2	5;3;2;2;2;2	5;3;2;2;2;2	40S ribosomal protein S19	RPS19	40S ribosomal protein S19;Isoform of P39019, 40S ribosomal protein S19	non matrisome	non matrisome	35128000	0	17439000	0	17689000	0	0		0	2	0	4	0	0	0	0	6				854	1689;2030;3635;6597;8164	True;True;True;True;True	1789;2150;3870;7083;8743	21143;25244;47716;47717;82164;99949;99950	22669;27060;51132;51133;87488;106437;106438	22669;27060;51133;87488;106438
P15880;H0YEN5;E9PM36;E9PMM9;E9PQD7;I3L404;E9PPT0;H3BNG3;H0YE27	P15880;H0YEN5;E9PM36;E9PMM9;E9PQD7;I3L404;E9PPT0	9;8;6;6;6;5;5;1;1	9;8;6;6;6;5;5;1;1	9;8;6;6;6;5;5;1;1	40S ribosomal protein S2	RPS2	40S ribosomal protein S2;Isoform of P15880, 40S ribosomal protein S2 (Fragment);Isoform of P15880, 40S ribosomal protein S2;Isoform of P15880, 40S ribosomal protein S2 (Fragment);Isoform of P15880, 40S ribosomal protein S2;Isoform of P15880, 40S ribosomal	non matrisome	non matrisome	83315000	0	26211000	0	32245000	24859000	0		0	9	1	6	3	3	0	3	25				745	112;273;2751;3330;4736;5021;5022;6900;7742	True;True;True;True;True;True;True;True;True	118;288;2923;3543;5026;5335;5336;7400;8303	1138;2399;2400;2401;32736;32737;43753;43754;43755;43756;43757;43758;59796;59797;63531;63532;63533;63534;63535;85157;85158;85159;95214;95215;95216;95217;95218	1195;2502;2503;2504;34936;34937;46830;46831;46832;46833;46834;46835;63859;63860;67771;67772;67773;67774;67775;90702;90703;90704;101437;101438;101439;101440;101441	1195;2502;34937;46835;63860;67774;67775;90702;101440	381	19
E5RJX2;P60866;P60866-2;E5RIP1	E5RJX2;P60866;P60866-2;E5RIP1	2;2;2;1	2;2;2;1	2;2;2;1	40S ribosomal protein S20	RPS20	Isoform of P60866, 40S ribosomal protein S20;40S ribosomal protein S20;Isoform of P60866, Isoform 2 of 40S ribosomal protein S20;Isoform of P60866, 40S ribosomal protein S20	non matrisome	non matrisome	8054400	0	0	0	8054400	0	0		0	1	1	3	0	1	0	0	6				288	7584;7810	True;True	8134;8375	93295;93296;93297;95993;95994;95995	99410;99411;99412;102276;102277;102278	99411;102278
Q8WVC2;Q9BYK1;P63220	Q8WVC2;Q9BYK1;P63220	2;2;2	2;2;2	2;2;2	40S ribosomal protein S21	RPS21	Isoform of P63220, 40S ribosomal protein S21;Isoform of P63220, 40S ribosomal protein S21;40S ribosomal protein S21	non matrisome	non matrisome	6969300	0	6969300	0	0	0	0		0	1	0	1	0	0	0	0	2				976	1357;7726	True;True	1436;8286	17179;94907;94908	18372;101109;101110	18372;101110
P62266;D6RDJ2;D6RIX0;D6R9I7;D6RD47	P62266;D6RDJ2;D6RIX0;D6R9I7;D6RD47	2;1;1;1;1	2;1;1;1;1	2;1;1;1;1	40S ribosomal protein S23	RPS23	40S ribosomal protein S23;Isoform of P62266, 40S ribosomal protein S23;Isoform of P62266, 40S ribosomal protein S23;Isoform of P62266, 40S ribosomal protein S23;Isoform of P62266, 40S ribosomal protein S23	non matrisome	non matrisome	74457000	0	33084000	0	41373000	0	0		1	4	0	5	1	1	1	1	14				950	356;7777	True;True	374;8341	3653;3654;3655;3656;95501;95502;95503;95504;95505;95506;95507;95508;95509;95510;95511	3844;3845;3846;3847;101732;101733;101734;101735;101736;101737;101738;101739;101740;101741;101742	3847;101737
E7ETK0;A0A087WUS0;P62847-2;P62847-3;P62847;P62847-4	E7ETK0;A0A087WUS0;P62847-2;P62847-3;P62847;P62847-4	3;3;3;3;3;3	3;3;3;3;3;3	3;3;3;3;3;3	40S ribosomal protein S24	RPS24	Isoform of P62847, 40S ribosomal protein S24;Isoform of P62847, 40S ribosomal protein S24;Isoform of P62847, Isoform 2 of 40S ribosomal protein S24;Isoform of P62847, Isoform 3 of 40S ribosomal protein S24;40S ribosomal protein S24;Isoform of P62847, Isofo	non matrisome	non matrisome	67663000	0	25552000	0	42111000	0	0		0	2	0	5	0	0	0	0	7				31	6196;7649;7662	True;True;True	6659;8202;8218	77355;93969;93970;93971;94056;94057;94058	82412;100109;100110;100111;100207;100208;100209	82412;100110;100209
P62851	P62851	2	2	2	40S ribosomal protein S25	RPS25	40S ribosomal protein S25	non matrisome	non matrisome	76159000	0	36755000	0	39404000	0	0		0	5	3	5	2	1	0	1	17				964	50;4829	True;True	51;5129	446;447;448;449;450;451;452;453;454;455;456;457;458;459;460;61033;61034	457;458;459;460;461;462;463;464;465;466;467;468;469;470;471;65133;65134	458;65134
P62854;Q5JNZ5	P62854;Q5JNZ5	2;1	2;1	2;1	40S ribosomal protein S26;Putative 40S ribosomal protein S26-like 1	RPS26;RPS26P11	40S ribosomal protein S26;Putative 40S ribosomal protein S26-like 1	non matrisome	non matrisome	181245000	0	50765000	0	75261000	55219000	0		1	5	2	7	8	7	3	3	36				965	1398;5534	True;True	1478;5946	17587;17588;17589;17590;17591;17592;17593;17594;17595;17596;17597;17598;17599;17600;17601;17602;69628;69629;69630;69631;69632;69633;69634;69635;69636;69637;69638;69639;69640;69641;69642;69643;69644;69645;69646;69647	18821;18822;18823;18824;18825;18826;18827;18828;18829;18830;18831;18832;18833;18834;18835;18836;74240;74241;74242;74243;74244;74245;74246;74247;74248;74249;74250;74251;74252;74253;74254;74255;74256;74257;74258;74259	18825;74246
P42677;C9J1C5;H0YMV8;Q71UM5;Q5T4L4	P42677;C9J1C5;H0YMV8;Q71UM5	3;2;2;2;1	3;2;2;2;1	3;2;2;2;1	40S ribosomal protein S27;40S ribosomal protein S27-like	RPS27;RPS27L	40S ribosomal protein S27;Isoform of Q71UM5, 40S ribosomal protein S27;Isoform of Q71UM5, 40S ribosomal protein S27;40S ribosomal protein S27-like	non matrisome	non matrisome	79776000	0	35433000	0	44343000	0	0		0	4	3	3	0	1	0	0	11				865	651;1447;5068	True;True;True	687;1528;5386	7061;17956;17957;17958;17959;17960;17961;17962;17963;17964;63902;63903;63904;63905	7438;19200;19201;19202;19203;19204;19205;19206;19207;19208;68147;68148;68149;68150	7438;19204;68148
P62857	P62857	2	2	2	40S ribosomal protein S28	RPS28	40S ribosomal protein S28	non matrisome	non matrisome	10845000	0	0	0	10845000	0	0		0	2	1	3	0	1	0	0	7				966	1913;3216	True;True	2023;3422	23282;23283;23284;23285;23286;41715	24930;24931;24932;24933;24934;24935;44599	24931;44599
P23396;E9PL09;P23396-2;E9PPU1;F2Z2S8;H0YCJ7;H0YEU2;H0YF32;E9PQ96;E9PJH4;E9PK82;E9PSF4;E9PQX2;H0YES8;E9PJN9	P23396;E9PL09;P23396-2;E9PPU1;F2Z2S8;H0YCJ7;H0YEU2;H0YF32	15;13;13;10;9;9;9;8;6;6;6;4;2;1;1	15;13;13;10;9;9;9;8;6;6;6;4;2;1;1	15;13;13;10;9;9;9;8;6;6;6;4;2;1;1	40S ribosomal protein S3	RPS3	40S ribosomal protein S3;Isoform of P23396, 40S ribosomal protein S3;Isoform of P23396, Isoform 2 of 40S ribosomal protein S3;Isoform of P23396, 40S ribosomal protein S3;Isoform of P23396, 40S ribosomal protein S3;Isoform of P23396, 40S ribosomal protein S	non matrisome	non matrisome	531760000	12860000	152520000	68935000	222410000	58243000	16792000		2	22	8	27	16	12	4	5	96				783	109;211;1245;2024;2094;2441;2467;2643;2646;2741;3959;4048;4699;6376;7306	True;True;True;True;True;True;True;True;True;True;True;True;True;True;True	115;223;1317;2144;2216;2587;2614;2615;2807;2810;2912;4212;4308;4989;6851;7833	1123;1124;1125;1893;1894;1895;1896;1897;1898;1899;1900;1901;1902;1903;1904;1905;1906;1907;15981;15982;15983;15984;15985;25190;25191;25192;25193;25194;25195;25196;25197;25198;25199;25200;25201;25655;25656;25657;25658;29397;29398;29399;29400;29401;29659;29660;29661;29662;31674;31675;31676;31677;31700;31701;32616;32617;32618;32619;32620;51560;51561;51562;51563;51564;51565;52606;52607;52608;52609;526…	1180;1181;1182;1980;1981;1982;1983;1984;1985;1986;1987;1988;1989;1990;1991;1992;1993;1994;17128;17129;17130;17131;17132;27006;27007;27008;27009;27010;27011;27012;27013;27014;27015;27016;27017;27506;27507;27508;27509;31429;31430;31431;31432;31433;31705;31706;31707;31708;33804;33805;33806;33807;33830;33831;34808;34809;34810;34811;34812;55205;55206;55207;55208;55209;55210;56315;56316;56317;56318;563…	1181;1989;17129;27017;27508;31432;31706;33806;33831;34808;55208;56316;63403;84925;95947	416	127
D6RG13;P61247;H0Y8L7;D6RB09;E9PFI5;D6RAT0;D6RAS7;D6RED7;D6R9B6;D6RGE0;D6RI02	D6RG13;P61247;H0Y8L7;D6RB09;E9PFI5;D6RAT0;D6RAS7;D6RED7	7;7;6;6;6;6;5;4;3;2;2	7;7;6;6;6;6;5;4;3;2;2	3;3;3;3;3;3;3;3;0;2;1	40S ribosomal protein S3a	RPS3A	Isoform of P61247, 40S ribosomal protein S3a (Fragment);40S ribosomal protein S3a;Isoform of P61247, 40S ribosomal protein S3a (Fragment);Isoform of P61247, 40S ribosomal protein S3a (Fragment);Isoform of P61247, 40S ribosomal protein S3a;Isoform of P61247	non matrisome	non matrisome	196841000	0	55195000	83964000	57682000	0	0		0	13	3	13	2	1	0	0	32				280	105;561;4646;5438;7640;7643;7926	True;True;True;True;True;True;True	111;592;4935;5838;8193;8196;8498	1063;6049;6050;6051;58916;58917;58918;58919;58920;58921;58922;58923;68340;68341;68342;93904;93905;93906;93947;93948;93949;93950;93951;97214;97215;97216;97217;97218;97219;97220	1107;6355;6356;6357;62940;62941;62942;62943;62944;62945;62946;62947;62948;62949;72850;72851;72852;100038;100039;100040;100086;100087;100088;100089;100090;103555;103556;103557;103558;103559;103560;103561	1107;6357;62945;72852;100039;100089;103561
P62701;Q8TD47;C9JEH7;P22090	P62701;Q8TD47	11;6;5;5	11;6;5;5	11;6;5;5	40S ribosomal protein S4, X isoform;40S ribosomal protein S4, Y isoform 2	RPS4X;RPS4Y2	40S ribosomal protein S4, X isoform;40S ribosomal protein S4, Y isoform 2	non matrisome	non matrisome	340010000	31373000	102200000	23537000	108590000	46406000	27904000		2	15	3	12	9	7	3	4	55				960	1185;1790;2386;3016;3823;5033;5078;5079;5974;8322;8622	True;True;True;True;True;True;True;True;True;True;True	1256;1897;2523;3209;4069;5347;5398;5399;6415;8913;9227	15548;15549;15550;15551;15552;22353;22354;28657;28658;28659;28660;28661;28662;37891;37892;50049;50050;50051;50052;50053;50054;50055;50056;50057;50058;50059;50060;50061;50062;63588;63589;63590;63591;63592;63593;63594;63595;63952;63953;63954;63955;63956;63957;74606;74607;74608;101988;101989;105529;105530;105531;105532;105533;105534;105535;105536;105537;105538	16655;16656;16657;16658;16659;23956;23957;30608;30609;30610;30611;30612;30613;40560;40561;53610;53611;53612;53613;53614;53615;53616;53617;53618;53619;53620;53621;53622;53623;67829;67830;67831;67832;67833;67834;67835;67836;68197;68198;68199;68200;68201;68202;79477;79478;79479;108608;108609;112304;112305;112306;112307;112308;112309;112310;112311;112312;112313	16657;23956;30613;40560;53613;67833;68197;68201;79478;108609;112311
M0R0F0;M0R0R2;P46782;M0QZN2	M0R0F0;M0R0R2;P46782;M0QZN2	3;3;3;2	3;3;3;2	3;3;3;2	40S ribosomal protein S5;40S ribosomal protein S5, N-terminally processed	RPS5	Isoform of P46782, 40S ribosomal protein S5 (Fragment);Isoform of P46782, 40S ribosomal protein S5;40S ribosomal protein S5;Isoform of P46782, 40S ribosomal protein S5	non matrisome	non matrisome	83267000	0	27843000	25169000	30255000	0	0		1	5	4	6	3	1	0	0	20				485	597;7426;8232	True;True;True	631;7959;8821	6537;6538;6539;6540;91459;91460;91461;91462;91463;91464;91465;91466;91467;100735;100736;100737;100738;100739;100740	6903;6904;6905;6906;6907;97456;97457;97458;97459;97460;97461;97462;97463;97464;107244;107245;107246;107247;107248;107249	6904;97459;107247
P62081;B5MCP9	P62081;B5MCP9	3;2	3;2	3;2	40S ribosomal protein S7	RPS7	40S ribosomal protein S7;Isoform of P62081, 40S ribosomal protein S7	non matrisome	non matrisome	48819000	0	48819000	0	0	0	0		0	5	1	2	0	0	0	0	8				944	388;3618;7901	True;True;True	406;3853;8471	3999;4000;47559;47560;96897;96898;96899;96900;96901	4221;4222;50970;50971;103226;103227;103228;103229;103230	4221;50970;103226
Q5JR95;P62241	Q5JR95;P62241	4;4	4;4	4;4	40S ribosomal protein S8	RPS8	Isoform of P62241, 40S ribosomal protein S8;40S ribosomal protein S8	non matrisome	non matrisome	94276000	0	36184000	0	58092000	0	0		1	7	1	9	1	0	1	0	20				946	127;3848;4099;8656	True;True;True;True	134;4095;4361;9264	1336;50365;50366;50367;50368;50369;50370;50371;50372;53223;53224;53225;53226;53227;53228;53229;53230;53231;53232;105948	1401;53933;53934;53935;53936;53937;53938;53939;53940;56963;56964;56965;56966;56967;56968;56969;56970;56971;56972;112749	1401;53935;56965;112749
A0A024R4M0;P46781;B5MCT8;C9JM19;F2Z3C0;A8MXK4	A0A024R4M0;P46781;B5MCT8;C9JM19	12;12;10;10;3;3	12;12;10;10;3;3	12;12;10;10;3;3	40S ribosomal protein S9	RPS9	Isoform of P46781, 40S ribosomal protein S9;40S ribosomal protein S9;Isoform of P46781, 40S ribosomal protein S9;Isoform of P46781, 40S ribosomal protein S9	non matrisome	non matrisome	293009000	0	70457000	58288000	113840000	50424000	0		1	14	3	16	13	14	1	3	65				1	2074;3710;3824;4421;4502;4503;4623;6301;6448;6469;7014;7043	True;True;True;True;True;True;True;True;True;True;True;True	2196;3945;4070;4700;4786;4787;4912;6773;6927;6948;7518;7548	25483;25484;25485;25486;48403;50063;50064;50065;50066;50067;50068;50069;50070;56540;56541;56542;56543;56544;56545;56546;56547;56548;56549;56550;56551;56552;56553;56554;56555;56556;56557;56558;56559;57447;57448;57449;57450;57451;57452;57453;57454;57455;57456;57457;57458;57459;57460;57461;58807;58808;58809;78917;78918;78919;78920;78921;78922;78923;78924;78925;78926;80515;80758;86151;86152;86614	27304;27305;27306;27307;51852;53624;53625;53626;53627;53628;53629;53630;53631;60436;60437;60438;60439;60440;60441;60442;60443;60444;60445;60446;60447;60448;60449;60450;60451;60452;60453;60454;60455;61398;61399;61400;61401;61402;61403;61404;61405;61406;61407;61408;61409;61410;61411;61412;62830;62831;62832;84039;84040;84041;84042;84043;84044;84045;84046;84047;84048;84049;85722;85973;91741;91742;922…	27304;51852;53626;60440;61408;61412;62830;84041;85722;85973;91742;92246
C9J9K3;A0A0C4DG17;P08865;F8WD59	C9J9K3;A0A0C4DG17;P08865;F8WD59	7;7;7;4	7;7;7;4	7;7;7;4	40S ribosomal protein SA	RPSA	Isoform of P08865, 40S ribosomal protein SA (Fragment);Isoform of P08865, 40S ribosomal protein SA;40S ribosomal protein SA;Isoform of P08865, 40S ribosomal protein SA (Fragment)	non matrisome	non matrisome	112545000	0	57887000	0	39274000	15384000	0		0	9	0	8	0	1	0	0	18				99	129;414;2331;2632;4779;6687;6781	True;True;True;True;True;True;True	136;434;2465;2795;5073;7179;7275	1402;4278;4279;4280;4281;4282;4283;27994;27995;31578;31579;31580;60456;60457;60458;60459;60460;83090;83091;83092;83093;83094;83095;83723	1474;4511;4512;4513;4514;4515;4516;29926;29927;33705;33706;33707;64543;64544;64545;64546;64547;88492;88493;88494;88495;88496;88497;89182	1474;4512;29926;33705;64544;88493;89182
F5GZS6;J3KPF3;P08195-2;P08195-3;P08195;P08195-4;F5H867;F5H0E2;H0YFS2	F5GZS6;J3KPF3;P08195-2;P08195-3;P08195;P08195-4;F5H867;F5H0E2;H0YFS2	2;2;2;2;2;2;1;1;1	2;2;2;2;2;2;1;1;1	2;2;2;2;2;2;1;1;1	4F2 cell-surface antigen heavy chain	SLC3A2	Isoform of P08195, 4F2 cell-surface antigen heavy chain;Isoform of P08195, 4F2 cell-surface antigen heavy chain;Isoform of P08195, Isoform 2 of 4F2 cell-surface antigen heavy chain;Isoform of P08195, Isoform 3 of 4F2 cell-surface antigen heavy chain;4F2 ce	non matrisome	non matrisome	1946100	0	0	0	1946100	0	0		0	0	0	2	0	0	0	0	2				353	1802;2270	True;True	1910;2400	22535;27422	24150;29343	24150;29343
P10809;E7ESH4;E7EXB4;P10809-2;C9JL25;C9JL19;C9JCQ4;C9J0S9	P10809	19;7;6;4;3;2;2;1	19;7;6;4;3;2;2;1	19;7;6;4;3;2;2;1	60 kDa heat shock protein, mitochondrial	HSPD1	60 kDa heat shock protein, mitochondrial	non matrisome	non matrisome	723380000	0	277060000	129580000	316740000	0	0		0	35	7	37	0	0	1	0	80				699	79;487;937;1214;1575;2717;3429;3800;4097;4098;4992;5186;5969;6430;7494;7689;7966;7976;7986	True;True;True;True;True;True;True;True;True;True;True;True;True;True;True;True;True;True;True	84;509;510;988;1285;1665;2888;3648;4040;4359;4360;5306;5507;6410;6908;8033;8034;8247;8538;8548;8558	768;769;5242;5243;5244;11006;11007;11008;11009;11010;11011;11012;11013;15699;15700;19857;19858;19859;19860;19861;19862;19863;19864;32277;32278;32279;32280;44953;49559;49560;49561;53217;53218;53219;53220;53221;53222;63066;63067;63068;65057;65058;65059;65060;65061;65062;65063;74567;74568;74569;74570;80260;92183;92184;92185;92186;92187;92188;92189;92190;94536;94537;94538;97713;97714;97715;97716;9771…	803;804;5525;5526;5527;5528;11629;11630;11631;11632;11633;11634;11635;11636;16814;16815;21330;21331;21332;21333;21334;21335;21336;21337;34429;34430;34431;34432;48146;53099;53100;53101;56957;56958;56959;56960;56961;56962;67290;67291;67292;69343;69344;69345;69346;69347;69348;69349;79438;79439;79440;79441;85461;98213;98214;98215;98216;98217;98218;98219;98220;100716;100717;100718;104086;104087;104088…	804;5527;11634;16814;21330;34430;48146;53100;56960;56961;67292;69347;79438;85461;98213;100718;104090;104220;104424	340;341;342	55;217;356
F8VWS0;P05388-2;P05388;G3V210;F8VU65;F8VS58;F8VQY6;F8VPE8;F8VRK7;F8VW21;F8VZS0;Q8NHW5;F8W1K8;F8VWV4	F8VWS0;P05388-2;P05388;G3V210;F8VU65;F8VS58;F8VQY6;F8VPE8;F8VRK7;F8VW21;F8VZS0;Q8NHW5	4;4;4;3;3;2;2;2;2;2;2;2;1;1	4;4;4;3;3;2;2;2;2;2;2;2;1;1	4;4;4;3;3;2;2;2;2;2;2;2;1;1	60S acidic ribosomal protein P0;60S acidic ribosomal protein P0-like	RPLP0;RPLP0P6	Isoform of P05388, 60S acidic ribosomal protein P0;Isoform of P05388, Isoform 2 of 60S acidic ribosomal protein P0;60S acidic ribosomal protein P0;Isoform of P05388, 60S acidic ribosomal protein P0;Isoform of P05388, 60S acidic ribosomal protein P0 (Fragme	non matrisome	non matrisome	255976000	0	65660000	96916000	93400000	0	0		0	8	5	10	3	2	0	0	28				371	257;3158;3867;7621	True;True;True;True	271;3360;4115;8172	2301;2302;2303;39711;39712;39713;39714;39715;39716;39717;39718;50542;50543;50544;50545;50546;50547;50548;50549;50550;50551;50552;50553;50554;50555;50556;50557;50558;93671;93672;93673;93674	2401;2402;2403;42487;42488;42489;42490;42491;42492;42493;42494;54128;54129;54130;54131;54132;54133;54134;54135;54136;54137;54138;54139;54140;54141;54142;54143;54144;99798;99799;99800;99801	2403;42488;54142;99801
P05386	P05386	2	1	1	60S acidic ribosomal protein P1	RPLP1	60S acidic ribosomal protein P1	non matrisome	non matrisome	12800000	0	0	0	12800000	0	0		1	0	0	1	0	0	0	0	2				648	37;4231	True;False	38;4502	311;312;54663	320;321;58466	321;58466
P05387;H0YDD8;P05386-2	P05387;H0YDD8	4;2;1	4;2;1	3;1;0	60S acidic ribosomal protein P2	RPLP2	60S acidic ribosomal protein P2;Isoform of P05387, 60S acidic ribosomal protein P2 (Fragment)	non matrisome	non matrisome	230985000	0	33419000	156770000	40796000	0	0		0	3	8	10	0	1	0	0	22				649	3899;4231;5515;8076	True;True;True;True	4148;4502;5926;8653	50799;50800;50801;50802;50803;50804;54663;69355;69356;69357;69358;69359;69360;69361;69362;69363;69364;69365;98961;98962	54393;54394;54395;54396;54397;54398;54399;58466;73958;73959;73960;73961;73962;73963;73964;73965;73966;73967;73968;73969;105405;105406	54397;58466;73958;105406
F8W7C6;A0A087WV22;X1WI28;P27635;H7C123;H7C2C5;Q96L21	F8W7C6;A0A087WV22;X1WI28;P27635;H7C123;H7C2C5;Q96L21	2;2;2;2;1;1;1	2;2;2;2;1;1;1	2;2;2;2;1;1;1	60S ribosomal protein L10;60S ribosomal protein L10-like	RPL10;RPL10L	Isoform of P27635, 60S ribosomal protein L10;Isoform of P27635, 60S ribosomal protein L10;Isoform of P27635, 60S ribosomal protein L10 (Fragment);60S ribosomal protein L10;Isoform of P27635, 60S ribosomal protein L10 (Fragment);Isoform of P27635, 60S ribos	non matrisome	non matrisome	59817000	0	23093000	0	23651000	13073000	0		0	4	1	5	1	1	0	2	14				33	2523;8024	True;True	2675;8597	30180;30181;30182;30183;30184;30185;98401;98402;98403;98404;98405;98406;98407;98408;98409;98410;98411	32240;32241;32242;32243;32244;32245;104815;104816;104817;104818;104819;104820;104821;104822;104823;104824;104825	32240;104821
P62906	P62906	8	8	8	60S ribosomal protein L10a	RPL10A	60S ribosomal protein L10a	non matrisome	non matrisome	170852000	0	48725000	68782000	53345000	0	0		1	15	4	16	1	1	0	1	39				969	783;1640;2554;2610;3909;4267;8367;8635	True;True;True;True;True;True;True;True	823;1735;2706;2772;4158;4540;8959;9243	8554;8555;8556;8557;8558;8559;8560;8561;20640;30587;30588;30589;30590;31376;31377;31378;50876;50877;50878;50879;50880;50881;50882;50883;50884;54905;54906;54907;54908;54909;54910;54911;54912;54913;54914;102406;105699;105700;105701;105702	9012;9013;9014;9015;9016;9017;9018;9019;22149;32664;32665;32666;32667;33500;33501;33502;54472;54473;54474;54475;54476;54477;54478;54479;54480;58732;58733;58734;58735;58736;58737;58738;58739;58740;58741;109066;112478;112479;112480;112481	9017;22149;32665;33501;54479;58741;109066;112480
P62913-2;P62913;Q5VVC9;Q5VVC8	P62913-2;P62913;Q5VVC9;Q5VVC8	4;4;3;3	4;4;3;3	4;4;3;3	60S ribosomal protein L11	RPL11	Isoform of P62913, Isoform 2 of 60S ribosomal protein L11;60S ribosomal protein L11;Isoform of P62913, 60S ribosomal protein L11 (Fragment);Isoform of P62913, 60S ribosomal protein L11 (Fragment)	non matrisome	non matrisome	25181000	0	25181000	0	0	0	0		0	4	0	4	0	0	0	0	8				970	184;3664;4359;8637	True;True;True;True	196;3899;4634;9245	1746;48052;55683;105707;105708;105709;105710;105711;105712	1832;51477;59532;112486;112487;112488;112489;112490;112491	1832;51477;59532;112490
P30050;P30050-2	P30050;P30050-2	5;3	5;3	5;3	60S ribosomal protein L12	RPL12	60S ribosomal protein L12;Isoform of P30050, Isoform 2 of 60S ribosomal protein L12	non matrisome	non matrisome	64992000	0	34513000	0	30479000	0	0		0	7	2	9	2	0	0	0	20				821	1108;1991;3582;3815;6001	True;True;True;True;True	1177;2107;3811;4057;6444	14591;24598;46916;46917;46918;46919;46920;46921;46922;46923;49755;74851;74852;74853;74854;74855;74856;74857;74858;74859	15621;26357;50271;50272;50273;50274;50275;50276;50277;50278;53297;79733;79734;79735;79736;79737;79738;79739;79740;79741	15621;26357;50273;53297;79739
J3QSB4;P26373;P26373-2;H3BTH3	J3QSB4;P26373;P26373-2	4;4;3;1	4;4;3;1	4;4;3;1	60S ribosomal protein L13	RPL13	Isoform of P26373, 60S ribosomal protein L13 (Fragment);60S ribosomal protein L13;Isoform of P26373, Isoform 2 of 60S ribosomal protein L13	non matrisome	non matrisome	138898000	0	43671000	50529000	44698000	0	0		0	9	4	11	3	3	3	2	35				467	2925;5757;7109;7790	True;True;True;True	3116;6190;7617;8355	36737;36738;36739;36740;36741;36742;36743;36744;36745;36746;36747;36748;36749;36750;36751;36752;36753;36754;36755;36756;36757;72395;72396;72397;87375;87376;87377;87378;87379;87380;87381;95682	39315;39316;39317;39318;39319;39320;39321;39322;39323;39324;39325;39326;39327;39328;39329;39330;39331;39332;39333;39334;39335;77151;77152;77153;93033;93034;93035;93036;93037;93038;93039;93040;93041;93042;101936	39324;77152;93033;101936
P40429;Q8J015;M0QYS1;Q6NVV1;M0QZU1;A0A096LPE0	P40429;Q8J015;M0QYS1;Q6NVV1	3;2;2;2;1;1	3;2;2;2;1;1	3;2;2;2;1;1	60S ribosomal protein L13a;Putative 60S ribosomal protein L13a protein RPL13AP3	RPL13A;RPL13a;RPL13AP3	60S ribosomal protein L13a;Isoform of P40429, 60S ribosomal protein L13a;Isoform of P40429, 60S ribosomal protein L13a (Fragment);Putative 60S ribosomal protein L13a protein RPL13AP3	non matrisome	non matrisome	17958000	0	0	0	17958000	0	0		0	0	1	3	1	0	0	0	5				859	237;5407;8807	True;True;True	251;5800;9421	2109;2110;2111;2112;67949;107845	2207;2208;2209;2210;72436;114749	2208;72436;114749
E7EPB3;P50914	E7EPB3;P50914	3;3	3;3	3;3	60S ribosomal protein L14	RPL14	Isoform of P50914, 60S ribosomal protein L14;60S ribosomal protein L14	non matrisome	non matrisome	120067000	0	68580000	0	51487000	0	0		3	8	2	9	0	4	1	3	30				292	527;5118;7809	True;True;True	552;5439;8374	5658;5659;5660;5661;64357;64358;64359;64360;64361;64362;64363;64364;64365;64366;64367;64368;64369;64370;64371;64372;64373;64374;64375;64376;64377;95988;95989;95990;95991;95992	5955;5956;5957;5958;68608;68609;68610;68611;68612;68613;68614;68615;68616;68617;68618;68619;68620;68621;68622;68623;68624;68625;68626;68627;68628;68629;68630;102271;102272;102273;102274;102275	5955;68616;102275
G3V203;J3QQ67;Q07020;H0YHA7;Q07020-2;F8VUA6;F8VYV2;A0A075B7A0;F8VXR6	G3V203;J3QQ67;Q07020;H0YHA7;Q07020-2;F8VUA6;F8VYV2;A0A075B7A0	7;7;7;6;6;5;5;5;1	7;7;7;6;6;5;5;5;1	7;7;7;6;6;5;5;5;1	60S ribosomal protein L18	RPL18	Isoform of Q07020, 60S ribosomal protein L18;Isoform of Q07020, 60S ribosomal protein L18 (Fragment);60S ribosomal protein L18;Isoform of Q07020, 60S ribosomal protein L18 (Fragment);Isoform of Q07020, Isoform 2 of 60S ribosomal protein L18;Isoform of Q070	non matrisome	non matrisome	331768000	0	104100000	91242000	111650000	24776000	0		0	16	7	14	2	4	0	0	43				382	2742;3942;7021;7239;7240;7547;7548	True;True;True;True;True;True;True	2913;4194;7525;7761;7762;8096;8097	32621;32622;51299;51300;51301;51302;51303;51304;51305;51306;51307;51308;51309;51310;51311;51312;86332;86333;86334;89420;89421;89422;89423;89424;89425;89426;89427;89428;89429;89430;89431;92889;92890;92891;92892;92893;92894;92895;92896;92897;92898;92899;92900	34813;34814;54907;54908;54909;54910;54911;54912;54913;54914;54915;54916;54917;54918;54919;54920;91948;91949;91950;95229;95230;95231;95232;95233;95234;95235;95236;95237;95238;95239;95240;98955;98956;98957;98958;98959;98960;98961;98962;98963;98964;98965;98966	34814;54912;91948;95236;95240;98960;98964
M0R0P7;M0R3D6;M0R1A7;M0R117;Q02543	M0R0P7;M0R3D6;M0R1A7;M0R117;Q02543	3;3;3;3;3	3;3;3;3;3	3;3;3;3;3	60S ribosomal protein L18a	RPL18A	Isoform of Q02543, 60S ribosomal protein L18a;Isoform of Q02543, 60S ribosomal protein L18a (Fragment);Isoform of Q02543, 60S ribosomal protein L18a;Isoform of Q02543, 60S ribosomal protein L18a;60S ribosomal protein L18a	non matrisome	non matrisome	9995400	0	9995400	0	0	0	0		0	1	0	2	2	1	1	0	7				487	1481;5476;7074	True;True;True	1563;5886;7579	18430;68776;68777;68778;86886;86887;86888;86889	19712;73333;73334;73335;92526;92527;92528;92529	19712;73335;92528
P46778;G3V1B3;M0R181	P46778;G3V1B3;M0R181	4;3;3	4;3;3	4;3;3	60S ribosomal protein L21	RPL21	60S ribosomal protein L21;Isoform of P46778, 60S ribosomal protein L21;Isoform of P46778, 60S ribosomal protein L21 (Fragment)	non matrisome	non matrisome	58007000	0	29574000	0	28433000	0	0		0	7	0	5	0	0	0	0	12				872	2139;3505;4236;8546	True;True;True;True	2261;3728;4507;9151	26073;46082;54679;54680;104706;104707;104708;104709;104710;104711;104712	27947;49380;49381;58482;58483;111458;111459;111460;111461;111462;111463;111464;111465	27947;49380;58483;111458
P62829;C9JD32;B9ZVP7;J3KT29;J3KTJ3	P62829;C9JD32;B9ZVP7;J3KT29	3;2;2;2;1	3;2;2;2;1	3;2;2;2;1	60S ribosomal protein L23	RPL23	60S ribosomal protein L23;Isoform of P62829, 60S ribosomal protein L23 (Fragment);Isoform of P62829, 60S ribosomal protein L23;Isoform of P62829, 60S ribosomal protein L23	non matrisome	non matrisome	50872000	0	50872000	0	0	0	0		1	6	1	4	1	1	1	1	16				963	3262;4078;5594	True;True;True	3469;4340;6009	42587;42588;53012;53013;53014;53015;53016;53017;53018;53019;53020;53021;53022;53023;53024;53025;53026;70559	45580;45581;56742;56743;56744;56745;56746;56747;56748;56749;56750;56751;56752;56753;56754;56755;56756;75196	45580;56751;75196
K7EMA7;H7BY10;K7EJV9;K7ERT8;A8MUS3;P62750	K7EMA7;H7BY10;K7EJV9;K7ERT8;A8MUS3;P62750	3;3;3;3;3;3	3;3;3;3;3;3	3;3;3;3;3;3	60S ribosomal protein L23a	RPL23A	Isoform of P62750, 60S ribosomal protein L23a;Isoform of P62750, 60S ribosomal protein L23a (Fragment);Isoform of P62750, 60S ribosomal protein L23a (Fragment);Isoform of P62750, 60S ribosomal protein L23a (Fragment);Isoform of P62750, 60S ribosomal protei	non matrisome	non matrisome	71301000	0	34959000	0	36342000	0	0		0	5	1	5	0	1	0	0	12				155	4317;5227;8237	True;True;True	4590;5550;8826	55212;55213;55214;55215;55216;55217;55218;65633;65634;65635;100779;100780	59049;59050;59051;59052;59053;59054;59055;69955;69956;69957;107291;107292	59049;69957;107291
C9JXB8;C9JNW5;P83731	C9JXB8;C9JNW5;P83731	3;3;3	3;3;3	3;3;3	60S ribosomal protein L24	RPL24	Isoform of P83731, 60S ribosomal protein L24;Isoform of P83731, 60S ribosomal protein L24;60S ribosomal protein L24	non matrisome	non matrisome	127031000	35481000	38207000	0	53343000	0	0		2	3	2	7	0	1	0	0	15				223	405;6134;7944	True;True;True	424;425;6594;8516	4176;4177;4178;4179;4180;4181;76569;76570;97380;97381;97382;97383;97384;97385;97386;97387;97388	4403;4404;4405;4406;4407;4408;81586;81587;103726;103727;103728;103729;103730;103731;103732;103733;103734	4408;81586;103728	95	91
J3KTJ8;J3QRI7;J3QQQ9;J3QQV1;E5RIT6;J3QRC4;Q9UNX3;P61254;E5RHH1;J3KSS0	J3KTJ8;J3QRI7;J3QQQ9;J3QQV1;E5RIT6;J3QRC4;Q9UNX3;P61254;E5RHH1;J3KSS0	2;2;2;2;2;2;2;2;1;1	2;2;2;2;2;2;2;2;1;1	2;2;2;2;2;2;2;2;1;1	60S ribosomal protein L26-like 1;60S ribosomal protein L26	RPL26;RPL26L1	Isoform of P61254, 60S ribosomal protein L26 (Fragment);Isoform of P61254, 60S ribosomal protein L26 (Fragment);Uncharacterized protein;Isoform of P61254, 60S ribosomal protein L26;Isoform of Q9UNX3, 60S ribosomal protein L26-like 1 (Fragment);Isoform of P	non matrisome	non matrisome	6433700	0	0	0	6433700	0	0		0	3	0	1	0	0	0	0	4				285	1220;2536	True;True	1292;2688	15760;15761;30319	16883;16884;16885;32384	16884;32384
P61353;K7EQQ9;K7ELC7;K7ERY7	P61353;K7EQQ9;K7ELC7	3;2;2;1	3;2;2;1	3;2;2;1	60S ribosomal protein L27	RPL27	60S ribosomal protein L27;Isoform of P61353, 60S ribosomal protein L27;Isoform of P61353, 60S ribosomal protein L27 (Fragment)	non matrisome	non matrisome	73805000	0	42598000	0	31207000	0	0		0	6	1	5	0	0	0	0	12				939	8493;8548;8852	True;True;True	9097;9153;9466	104216;104217;104218;104219;104721;104722;108448;108449;108450;108451;108452;108453	110952;110953;110954;110955;111474;111475;115392;115393;115394;115395;115396;115397	110955;111474;115393
E9PJD9;E9PLL6;P46776;E9PLX7	E9PJD9;E9PLL6;P46776	3;3;3;1	3;3;3;1	3;3;3;1	60S ribosomal protein L27a	RPL27A	Isoform of P46776, 60S ribosomal protein L27a;Isoform of P46776, 60S ribosomal protein L27a;60S ribosomal protein L27a	non matrisome	non matrisome	186488000	0	55242000	72752000	34714000	23780000	0		1	6	5	5	4	2	2	1	26				330	5224;6498;7369	True;True;True	5547;6980;7901	65613;65614;65615;65616;65617;65618;65619;65620;65621;65622;65623;65624;80910;80911;80912;80913;80914;90706;90707;90708;90709;90710;90711;90712;90713;90714;90715;90716;90717;90718;90719;90720;90721;90722;90723;90724	69935;69936;69937;69938;69939;69940;69941;69942;69943;69944;69945;69946;86127;86128;86129;86130;86131;96598;96599;96600;96601;96602;96603;96604;96605;96606;96607;96608;96609;96610;96611;96612;96613;96614;96615;96616	69945;86128;96606
H0YKD8;P46779;P46779-2;P46779-3;H0YLP6;H0YMF4;P46779-4;P46779-5	H0YKD8;P46779;P46779-2;P46779-3;H0YLP6;H0YMF4;P46779-4;P46779-5	3;3;3;3;2;2;2;2	3;3;3;3;2;2;2;2	3;3;3;3;2;2;2;2	60S ribosomal protein L28	RPL28	Isoform of P46779, 60S ribosomal protein L28;60S ribosomal protein L28;Isoform of P46779, Isoform 2 of 60S ribosomal protein L28;Isoform of P46779, Isoform 3 of 60S ribosomal protein L28;Isoform of P46779, 60S ribosomal protein L28;Isoform of P46779, 60S r	non matrisome	non matrisome	34216000	0	0	34216000	0	0	0		0	4	2	0	0	0	0	0	6				417	5765;7686;8789	True;True;True	6199;8244;9402	72441;94525;94526;94527;94528;107648	77198;100705;100706;100707;100708;114535	77198;100707;114535
P39023;G5E9G0;B5MCW2;H7C422;H7C3M2;F8WCR1	P39023;G5E9G0;B5MCW2;H7C422;H7C3M2	8;6;5;5;4;3	8;6;5;5;4;3	8;6;5;5;4;3	60S ribosomal protein L3	RPL3	60S ribosomal protein L3;Isoform of P39023, 60S ribosomal protein L3;Isoform of P39023, 60S ribosomal protein L3 (Fragment);Isoform of P39023, 60S ribosomal protein L3 (Fragment);Isoform of P39023, 60S ribosomal protein L3 (Fragment)	non matrisome	non matrisome	91022000	0	47392000	0	43630000	0	0		0	15	2	6	2	1	0	0	26				855	357;3501;3818;5606;5954;6936;7683;7759	True;True;True;True;True;True;True;True	375;3723;4062;6028;6394;7437;8241;8321	3657;3658;3659;3660;3661;45987;49944;49945;49946;49947;49948;49949;70796;70797;74497;74498;85401;85402;85403;94510;95431;95432;95433;95434;95435;95436;95437;95438	3848;3849;3850;3851;3852;49282;53495;53496;53497;53498;53499;53500;75444;75445;79365;79366;90953;90954;90955;100690;101659;101660;101661;101662;101663;101664;101665;101666	3848;49282;53500;75444;79365;90954;100690;101660
E5RI99;P62888;E5RJH3;A0A0B4J213;A0A0C4DH44	E5RI99;P62888;E5RJH3	4;4;2;1;1	4;4;2;1;1	4;4;2;1;1	60S ribosomal protein L30	RPL30	Isoform of P62888, 60S ribosomal protein L30 (Fragment);60S ribosomal protein L30;Isoform of P62888, 60S ribosomal protein L30	non matrisome	non matrisome	135616000	0	39650000	64387000	31579000	0	0		1	6	4	6	2	2	0	0	21				284	5152;6731;6904;7407	True;True;True;True	5473;7225;7404;7940	64729;64730;64731;64732;64733;64734;64735;64736;64737;64738;64739;64740;64741;83405;83406;83407;85183;85184;85185;85186;91165;91166	69002;69003;69004;69005;69006;69007;69008;69009;69010;69011;69012;69013;69014;88829;88830;88831;90729;90730;90731;90732;97130;97131	69008;88830;90731;97130
P62899;H7C2W9;C9JU56;B7Z4E3;B7Z4C8;P62899-3;P62899-2;B8ZZK4	P62899;H7C2W9;C9JU56;B7Z4E3;B7Z4C8;P62899-3;P62899-2	3;2;2;2;2;2;2;1	3;2;2;2;2;2;2;1	3;2;2;2;2;2;2;1	60S ribosomal protein L31	RPL31	60S ribosomal protein L31;Isoform of P62899, 60S ribosomal protein L31 (Fragment);Isoform of P62899, 60S ribosomal protein L31 (Fragment);Isoform of P62899, 60S ribosomal protein L31;Isoform of P62899, 60S ribosomal protein L31;Isoform of P62899, Isoform 3	non matrisome	non matrisome	212781000	0	58730000	73735000	80316000	0	0		0	3	4	4	0	0	0	0	11				968	5252;5582;6629	True;True;True	5575;5997;7117	65968;65969;65970;70443;82533;82534;82535;82536;82537;82538;82539	70312;70313;70314;75079;87871;87872;87873;87874;87875;87876;87877	70312;75079;87876
D3YTB1;F8W727;P62910	D3YTB1;F8W727;P62910	2;2;2	2;2;2	2;2;2	60S ribosomal protein L32	RPL32	Isoform of P62910, 60S ribosomal protein L32 (Fragment);Isoform of P62910, 60S ribosomal protein L32;60S ribosomal protein L32	non matrisome	non matrisome	13268000	0	0	0	13268000	0	0		0	2	0	3	0	0	0	0	5				264	2047;7185	True;True	2168;7698	25344;88579;88580;88581;88582	27164;94345;94346;94347;94348	27164;94345
P49207	P49207	4	4	4	60S ribosomal protein L34	RPL34	60S ribosomal protein L34	non matrisome	non matrisome	9813700	0	0	0	9813700	0	0		0	2	0	4	0	0	0	0	6				882	260;4194;6314;6473	True;True;True;True	274;4463;6786;6952	2318;54207;79037;79038;79039;80773	2418;57997;84165;84166;84167;85988	2418;57997;84165;85988
F2Z388;P42766	F2Z388;P42766	1;1	1;1	1;1	60S ribosomal protein L35	RPL35	Isoform of P42766, 60S ribosomal protein L35;60S ribosomal protein L35	non matrisome	non matrisome	22406000	0	0	0	22406000	0	0		1	3	0	4	0	1	0	0	9				347	8188	TRUE	8770	100186;100187;100188;100189;100190;100191;100192;100193;100194	106677;106678;106679;106680;106681;106682;106683;106684;106685	106684
P18077;F8WBS5;F8WB72;C9K025	P18077;F8WBS5;F8WB72;C9K025	4;3;3;3	4;3;3;3	4;3;3;3	60S ribosomal protein L35a	RPL35A	60S ribosomal protein L35a;Isoform of P18077, 60S ribosomal protein L35a;Isoform of P18077, 60S ribosomal protein L35a;Isoform of P18077, 60S ribosomal protein L35a (Fragment)	non matrisome	non matrisome	0	0	0	0	0	0	0		0	2	0	0	2	0	0	0	4				754	1251;3727;6330;8211	True;True;True;True	1324;3962;6802;8798	16013;48580;79221;100584	17163;52037;84366;107088	17163;52037;84366;107088
P63173;J3KT73;J3QL01;J3KSP2	P63173;J3KT73;J3QL01	3;2;2;1	3;2;2;1	3;2;2;1	60S ribosomal protein L38	RPL38	60S ribosomal protein L38;Isoform of P63173, 60S ribosomal protein L38;Isoform of P63173, 60S ribosomal protein L38	non matrisome	non matrisome	575788000	157970000	131850000	114240000	127710000	44018000	0		4	8	4	10	5	3	2	2	38				975	1272;6247;8779	True;True;True	1346;6714;9389	16289;16290;16291;16292;16293;16294;16295;16296;16297;16298;16299;16300;16301;16302;16303;78053;78054;78055;107454;107455;107456;107457;107458;107459;107460;107461;107462;107463;107464;107465;107466;107467;107468;107469;107470;107471;107472;107473	17447;17448;17449;17450;17451;17452;17453;17454;17455;17456;17457;17458;17459;17460;17461;83143;83144;83145;114334;114335;114336;114337;114338;114339;114340;114341;114342;114343;114344;114345;114346;114347;114348;114349;114350;114351;114352;114353	17455;83143;114344
P36578;H3BM89;H3BU31;H3BTP7	P36578;H3BM89	9;7;3;2	9;7;3;2	9;7;3;2	60S ribosomal protein L4	RPL4	60S ribosomal protein L4;Isoform of P36578, 60S ribosomal protein L4	non matrisome	non matrisome	191472000	0	78089000	58599000	54784000	0	0		1	13	3	8	4	0	0	0	29				849	0;92;2369;2370;2994;3169;3721;5529;5725	True;True;True;True;True;True;True;True;True	0;97;2504;2505;3187;3372;3956;5941;6156	0;1;2;3;4;5;6;7;8;9;10;832;833;834;835;28401;28402;28403;28404;37658;40909;40910;48557;48558;69561;69562;69563;69564;69565;69566;69567;72008	0;1;2;3;4;5;6;7;8;9;10;868;869;870;871;30342;30343;30344;30345;40320;43725;43726;52014;52015;74171;74172;74173;74174;74175;74176;74177;76724	4;868;30342;30345;40320;43726;52014;74175;76724
P46777;Q5T7N0;R4GNJ2	P46777;Q5T7N0	8;4;1	8;4;1	8;4;1	60S ribosomal protein L5	RPL5	60S ribosomal protein L5;Isoform of P46777, 60S ribosomal protein L5 (Fragment)	non matrisome	non matrisome	225944000	0	76458000	110140000	39346000	0	0		0	14	5	10	3	3	0	1	36				871	1384;2734;3515;3724;6082;6479;7987;8759	True;True;True;True;True;True;True;True	1463;2905;3738;3959;6535;6958;8559;9369	17438;17439;17440;17441;17442;17443;17444;17445;17446;17447;17448;17449;17450;17451;17452;17453;17454;32558;46115;46116;46117;46118;48565;48566;48567;48568;48569;48570;75815;75816;80804;80805;80806;98040;98041;107135;107136	18657;18658;18659;18660;18661;18662;18663;18664;18665;18666;18667;18668;18669;18670;18671;18672;18673;34745;49415;49416;49417;49418;52022;52023;52024;52025;52026;52027;80741;80742;86019;86020;86021;104428;104429;114003;114004	18663;34745;49418;52023;80741;86020;104428;114004
Q02878;F8VR69;F8VZ45;U3KQR5	Q02878	9;3;3;3	9;3;3;3	9;3;3;3	60S ribosomal protein L6	RPL6	60S ribosomal protein L6	non matrisome	non matrisome	202085000	0	97863000	0	62355000	41867000	0		0	13	1	13	6	3	1	1	38				1011	396;687;3536;3692;5921;7146;8655;8889;8890	True;True;True;True;True;True;True;True;True	415;725;3759;3927;6360;7656;9263;9505;9506	4088;4089;4090;4091;4092;4093;4094;7473;7474;7475;7476;7477;7478;7479;46306;46307;46308;46309;46310;46311;46312;48262;48263;48264;48265;48266;48267;48268;74250;88046;88047;88048;88049;105947;108748;108749;108750;108751	4312;4313;4314;4315;4316;4317;4318;7874;7875;7876;7877;7878;7879;7880;49616;49617;49618;49619;49620;49621;49622;51703;51704;51705;51706;51707;51708;51709;79095;93740;93741;93742;93743;112748;115713;115714;115715;115716	4313;7879;49617;51705;79095;93741;112748;115713;115715
A8MUD9;P18124;C9JIJ5	A8MUD9;P18124	5;5;1	5;5;1	5;5;1	60S ribosomal protein L7	RPL7	Isoform of P18124, 60S ribosomal protein L7;60S ribosomal protein L7	non matrisome	non matrisome	158930000	0	71604000	0	87326000	0	0		0	9	3	8	0	1	0	0	21				154	686;3643;4163;6420;7655	True;True;True;True;True	724;3878;4430;6897;8210	7468;7469;7470;7471;7472;47817;47818;47819;47820;47821;47822;47823;47824;47825;47826;47827;53890;53891;53892;80167;80168;94030;94031;94032;94033	7869;7870;7871;7872;7873;51236;51237;51238;51239;51240;51241;51242;51243;51244;51245;51246;57668;57669;57670;85367;85368;100179;100180;100181;100182;100183	7869;51239;57670;85368;100182
Q5T8U3;P62424;Q5T8U2	Q5T8U3;P62424	6;6;1	6;6;1	6;6;1	60S ribosomal protein L7a	RPL7A	Isoform of P62424, 60S ribosomal protein L7a (Fragment);60S ribosomal protein L7a	non matrisome	non matrisome	208912000	0	97992000	0	110920000	0	0		0	12	5	9	0	0	0	0	26				959	343;5475;6259;7778;8258;8497	True;True;True;True;True;True	361;5885;6726;8342;8848;9101	3179;3180;3181;3182;3183;3184;3185;3186;68771;68772;68773;68774;68775;78241;78242;95512;95513;95514;95515;95516;101069;101070;101071;101072;101073;101074;101075;101076;101077;104233;104234	3333;3334;3335;3336;3337;3338;3339;3340;73328;73329;73330;73331;73332;83349;83350;101743;101744;101745;101746;101747;107604;107605;107606;107607;107608;107609;107610;107611;107612;110970;110971	3334;73330;83349;101747;107605;110971
E9PKZ0;P62917;E9PP36;G3V1A1;E9PKU4	E9PKZ0;P62917;E9PP36;G3V1A1;E9PKU4	3;3;2;2;2	3;3;2;2;2	3;3;2;2;2	60S ribosomal protein L8	RPL8	Isoform of P62917, 60S ribosomal protein L8 (Fragment);60S ribosomal protein L8;Isoform of P62917, 60S ribosomal protein L8;Isoform of P62917, 60S ribosomal protein L8;Isoform of P62917, 60S ribosomal protein L8 (Fragment)	non matrisome	non matrisome	70540000	0	45231000	0	0	25309000	0		0	5	1	4	3	2	1	2	18				333	677;781;837	True;True;True	715;821;879	7375;8546;8547;8548;8549;8550;8551;9277;9278;9279;9280;9281;9282;9283;9284;9285;9286;9287;9288	7768;9004;9005;9006;9007;9008;9009;9777;9778;9779;9780;9781;9782;9783;9784;9785;9786;9787;9788	7768;9005;9778
E7ESE0;D6RAN4;P32969;H0Y9V9	E7ESE0;D6RAN4;P32969;H0Y9V9	2;2;2;1	2;2;2;1	2;2;2;1	60S ribosomal protein L9	RPL9	Isoform of P32969, 60S ribosomal protein L9 (Fragment);Isoform of P32969, 60S ribosomal protein L9 (Fragment);60S ribosomal protein L9;Isoform of P32969, 60S ribosomal protein L9 (Fragment)	non matrisome	non matrisome	48656000	0	18900000	0	29756000	0	0		1	7	1	8	3	2	1	1	24				273	3393;7440	True;True	3611;7973	44517;44518;44519;44520;44521;44522;44523;44524;44525;44526;44527;44528;44529;44530;44531;44532;44533;91572;91573;91574;91575;91576;91577;91578	47662;47663;47664;47665;47666;47667;47668;47669;47670;47671;47672;47673;47674;47675;47676;47677;47678;97579;97580;97581;97582;97583;97584;97585;97586	47678;97581
P11021	P11021	18	17	17	78 kDa glucose-regulated protein	HSPA5	78 kDa glucose-regulated protein	non matrisome	non matrisome	683180000	0	150700000	358460000	174020000	0	0		0	20	20	22	0	0	0	0	62				701	1174;1504;2044;2231;2398;3863;4135;4143;5232;5466;5505;5654;6691;7025;7333;7724;8417;8539	True;True;True;True;True;False;True;True;True;True;True;True;True;True;True;True;True;True	1245;1590;2165;2359;2535;4110;4402;4410;5555;5875;5915;6078;7183;7529;7862;8284;9011;9144	15463;15464;15465;15466;15467;18773;18774;18775;18776;18777;18778;25328;25329;25330;25331;25332;25333;25334;25335;25336;27148;27149;28809;28810;28811;28812;28813;28814;50474;50475;50476;50477;50478;50479;50480;50481;50482;50483;50484;50485;50486;50487;50488;50489;50490;50491;50492;50493;53650;53651;53652;53653;53711;53712;53713;53714;53715;53716;65659;65660;68726;68727;68728;68729;68730;69139;713…	16569;16570;16571;16572;16573;20112;20113;20114;20115;20116;20117;27148;27149;27150;27151;27152;27153;27154;27155;27156;29056;29057;30783;30784;30785;30786;30787;30788;54054;54055;54056;54057;54058;54059;54060;54061;54062;54063;54064;54065;54066;54067;54068;54069;54070;54071;54072;54073;54074;54075;54076;54077;57409;57410;57411;57412;57471;57472;57473;57474;57475;57476;69986;69987;73283;73284;732…	16571;20113;27148;29057;30785;54055;57410;57474;69986;73285;73720;76022;88511;92068;96208;101103;109580;111431
O75173;O75173-2;Q5VTW1	O75173;O75173-2;Q5VTW1	12;10;8	12;10;8	12;10;8	A disintegrin and metalloproteinase with thrombospondin motifs 4	ADAMTS4	A disintegrin and metalloproteinase with thrombospondin motifs 4;Isoform of O75173, Isoform 2 of A disintegrin and metalloproteinase with thrombospondin motifs 4;Isoform of O75173, A disintegrin and metalloproteinase with thrombospondin motifs 4	Matrisome-associated	ECM Regulators	414615000	0	212280000	90574000	29589000	30334000	51838000		0	21	9	3	13	3	0	8	57				540	616;2649;3085;5156;5254;5643;6035;6612;6757;8706;8758;8859	True;True;True;True;True;True;True;True;True;True;True;True	651;2813;3280;5477;5577;6067;6485;7098;7251;9315;9368;9473	6742;6743;31739;38713;38714;38715;38716;38717;38718;38719;38720;38721;38722;38723;38724;38725;64779;64780;64781;64782;64783;64784;64785;64786;64787;64788;65972;65973;65974;71148;71149;71150;71151;71152;71153;71154;71155;71156;71157;71158;71159;71160;71161;71162;71163;75266;82353;83565;106598;107130;107131;107132;107133;107134;108557	7114;7115;33869;41407;41408;41409;41410;41411;41412;41413;41414;41415;41416;41417;41418;41419;41420;41421;69052;69053;69054;69055;69056;69057;69058;69059;69060;69061;69062;70316;70317;70318;75812;75813;75814;75815;75816;75817;75818;75819;75820;75821;75822;75823;75824;75825;75826;75827;80163;87686;88994;113454;113455;113998;113999;114000;114001;114002;115510	7115;33869;41416;69055;70317;75821;80163;87686;88994;113454;114001;115510	213;214	230;332
Q9UNA0	Q9UNA0	11	11	11	A disintegrin and metalloproteinase with thrombospondin motifs 5	ADAMTS5	A disintegrin and metalloproteinase with thrombospondin motifs 5	Matrisome-associated	ECM Regulators	297870000	0	139330000	61529000	28992000	36905000	31114000		0	22	4	4	8	4	0	3	45				1260	1993;2366;2617;3099;4803;5217;6105;6458;7363;8015;8619	True;True;True;True;True;True;True;True;True;True;True	2109;2501;2779;3294;5102;5540;6562;6563;6937;7895;8588;9224	24600;24601;24602;28384;28385;28386;31425;31426;31427;31428;31429;31430;31431;38932;60736;60737;60738;60739;60740;60741;60742;60743;65536;65537;65538;65539;65540;65541;65542;65543;65544;65545;65546;76081;76082;76083;76084;76085;80659;80660;80661;90657;90658;98345;105493;105494;105495	26359;26360;26361;30325;30326;30327;33549;33550;33551;33552;33553;33554;33555;41662;64826;64827;64828;64829;64830;64831;64832;64833;64834;69858;69859;69860;69861;69862;69863;69864;69865;69866;69867;69868;81033;81034;81035;81036;81037;85873;85874;85875;96548;96549;104756;112268;112269;112270	26361;30327;33552;41662;64827;69861;81033;85873;96548;104756;112269	733;734	439;527
H0YN26;P39687;O43423;H7BZ09;O95626	H0YN26;P39687;O43423	4;4;2;1;1	4;4;2;1;1	4;4;2;1;1	Acidic leucine-rich nuclear phosphoprotein 32 family member A;Acidic leucine-rich nuclear phosphoprotein 32 family member C	ANP32A;ANP32C	Isoform of P39687, Acidic leucine-rich nuclear phosphoprotein 32 family member A;Acidic leucine-rich nuclear phosphoprotein 32 family member A;Acidic leucine-rich nuclear phosphoprotein 32 family member C	non matrisome	non matrisome	10427000	0	0	10427000	0	0	0		0	2	2	3	0	0	0	0	7				422	1043;1475;2100;8343	True;True;True;True	1104;1556;2222;8934	13150;18353;25759;25760;102170;102171;102172	13921;19633;27621;27622;108800;108801;108802	13921;19633;27621;108801
P68032;P68133;A6NL76	P68032;P68133;A6NL76	24;23;15	24;23;15	0;0;0	Actin, alpha cardiac muscle 1;Actin, alpha skeletal muscle	ACTC1;ACTA1	Actin, alpha cardiac muscle 1;Actin, alpha skeletal muscle;Isoform of P68133, Actin, alpha skeletal muscle	cytoskeleton	non matrisome	80496800000	14657000000	7322400000	6437400000	17812000000	9056000000	25212000000		101	133	74	170	139	141	108	197	1063				982	298;789;790;909;1037;1478;1482;1614;2017;2563;3435;3558;3836;3837;4201;4372;4399;6069;6070;6409;7189;7653;7780;8801	True;True;True;True;True;True;True;True;True;True;True;True;True;True;True;True;True;True;True;True;True;True;True;True	314;829;830;959;1096;1097;1098;1559;1560;1564;1565;1709;2136;2137;2715;2716;2717;3654;3782;3783;3784;4082;4083;4470;4648;4649;4677;4678;6522;6523;6885;7704;8206;8207;8344;9414;9415	2687;2688;2689;2690;2691;2692;2693;2694;2695;2696;2697;2698;2699;2700;2701;2702;2703;2704;2705;2706;2707;2708;2709;2710;2711;2712;2713;2714;2715;2716;2717;2718;2719;8609;8610;8611;8612;8613;8614;8615;8616;8617;8618;8619;8620;8621;8622;8623;8624;8625;8626;8627;8628;8629;8630;8631;8632;8633;8634;8635;8636;8637;8638;8639;8640;8641;8642;8643;8644;8645;8646;8647;8648;8649;8650;8651;8652;8653;8654;8655…	2815;2816;2817;2818;2819;2820;2821;2822;2823;2824;2825;2826;2827;2828;2829;2830;2831;2832;2833;2834;2835;2836;2837;2838;2839;2840;2841;2842;2843;2844;2845;2846;2847;2848;9069;9070;9071;9072;9073;9074;9075;9076;9077;9078;9079;9080;9081;9082;9083;9084;9085;9086;9087;9088;9089;9090;9091;9092;9093;9094;9095;9096;9097;9098;9099;9100;9101;9102;9103;9104;9105;9106;9107;9108;9109;9110;9111;9112;9113;9114…	2819;9069;9126;10909;13759;19639;19773;21781;26930;32755;48280;49919;53782;53814;58117;59935;60239;80607;80639;85259;94438;100147;101785;114682	530;532;533;534;546;547;548;549;550;551	46;49;84;178;192;229;271;285;307;327
P62736;C9JFL5;F6UVQ4;F6QUT6;F8WB63;B8ZZJ2	P62736	24;9;9;9;7;7	1;1;1;1;0;0	0;0;0;0;0;0	Actin, aortic smooth muscle	ACTA2	Actin, aortic smooth muscle	cytoskeleton	non matrisome	1344960000	0	170450000	0	353910000	145470000	675130000		2	11	1	8	9	5	6	10	52				961	298;789;790;909;1037;1478;1482;1614;2017;2563;3435;3558;3836;3837;4200;4372;4399;6069;6070;6409;7189;7653;7780;8801	False;False;False;False;False;False;False;False;False;False;False;False;False;False;True;False;False;False;False;False;False;False;False;False	314;829;830;959;1096;1097;1098;1559;1560;1564;1565;1709;2136;2137;2715;2716;2717;3654;3782;3783;3784;4082;4083;4469;4648;4649;4677;4678;6522;6523;6885;7704;8206;8207;8344;9414;9415	2687;2688;2689;2690;2691;2692;2693;2694;2695;2696;2697;2698;2699;2700;2701;2702;2703;2704;2705;2706;2707;2708;2709;2710;2711;2712;2713;2714;2715;2716;2717;2718;2719;8609;8610;8611;8612;8613;8614;8615;8616;8617;8618;8619;8620;8621;8622;8623;8624;8625;8626;8627;8628;8629;8630;8631;8632;8633;8634;8635;8636;8637;8638;8639;8640;8641;8642;8643;8644;8645;8646;8647;8648;8649;8650;8651;8652;8653;8654;8655…	2815;2816;2817;2818;2819;2820;2821;2822;2823;2824;2825;2826;2827;2828;2829;2830;2831;2832;2833;2834;2835;2836;2837;2838;2839;2840;2841;2842;2843;2844;2845;2846;2847;2848;9069;9070;9071;9072;9073;9074;9075;9076;9077;9078;9079;9080;9081;9082;9083;9084;9085;9086;9087;9088;9089;9090;9091;9092;9093;9094;9095;9096;9097;9098;9099;9100;9101;9102;9103;9104;9105;9106;9107;9108;9109;9110;9111;9112;9113;9114…	2819;9069;9126;10909;13759;19639;19773;21781;26930;32755;48280;49919;53782;53814;58078;59935;60239;80607;80639;85259;94438;100147;101785;114682	530;532;533;534;546;547;548;549;550;551	46;49;84;178;192;229;271;285;307;327
P60709;G5E9R0;E7EVS6;Q6S8J3;C9JZR7;C9JTX5;C9JUM1	P60709	23;9;9;9;8;7;7	10;2;2;3;1;1;0	1;1;1;0;1;1;0	Actin, cytoplasmic 1;Actin, cytoplasmic 1, N-terminally processed	ACTB	Actin, cytoplasmic 1	cytoskeleton	non matrisome	6592820000	922560000	1095800000	518160000	1298700000	1220700000	1536900000		18	41	11	43	39	51	29	59	291				928	298;789;790;922;1034;1215;1478;1483;1614;2017;3434;3558;3836;3837;4201;4373;4399;6071;6072;6409;7189;7654;7781	False;False;False;True;True;True;False;True;False;False;True;False;False;False;False;True;False;True;True;False;False;True;True	314;829;830;972;1093;1286;1287;1559;1560;1566;1567;1709;2136;2137;3653;3782;3783;3784;4082;4083;4470;4650;4651;4677;4678;6524;6525;6885;7704;8208;8209;8345	2687;2688;2689;2690;2691;2692;2693;2694;2695;2696;2697;2698;2699;2700;2701;2702;2703;2704;2705;2706;2707;2708;2709;2710;2711;2712;2713;2714;2715;2716;2717;2718;2719;8609;8610;8611;8612;8613;8614;8615;8616;8617;8618;8619;8620;8621;8622;8623;8624;8625;8626;8627;8628;8629;8630;8631;8632;8633;8634;8635;8636;8637;8638;8639;8640;8641;8642;8643;8644;8645;8646;8647;8648;8649;8650;8651;8652;8653;8654;8655…	2815;2816;2817;2818;2819;2820;2821;2822;2823;2824;2825;2826;2827;2828;2829;2830;2831;2832;2833;2834;2835;2836;2837;2838;2839;2840;2841;2842;2843;2844;2845;2846;2847;2848;9069;9070;9071;9072;9073;9074;9075;9076;9077;9078;9079;9080;9081;9082;9083;9084;9085;9086;9087;9088;9089;9090;9091;9092;9093;9094;9095;9096;9097;9098;9099;9100;9101;9102;9103;9104;9105;9106;9107;9108;9109;9110;9111;9112;9113;9114…	2819;9069;9126;11116;13727;16840;19639;19915;21781;26930;48239;49919;53782;53814;58117;59983;60239;80650;80662;85259;94438;100173;101849	527;528;529;530;531;532;533;534;535;536	16;44;47;153;190;227;269;283;305;325
P63261;I3L3I0;I3L1U9;I3L4N8;K7EM38;I3L3R2;J3KT65	P63261;I3L3I0;I3L1U9;I3L4N8	23;13;13;12;9;9;9	1;1;1;1;1;1;1	1;1;1;1;1;1;1	Actin, cytoplasmic 2;Actin, cytoplasmic 2, N-terminally processed	ACTG1	Actin, cytoplasmic 2;Isoform of P63261, Actin, cytoplasmic 2 (Fragment);Isoform of P63261, Actin, cytoplasmic 2 (Fragment);Isoform of P63261, Actin, cytoplasmic 2 (Fragment)	cytoskeleton	non matrisome	45325000	0	0	0	45325000	0	0		1	2	3	3	2	1	3	2	17				978	298;789;790;922;1034;1478;1483;1614;1836;2017;3434;3558;3836;3837;4201;4373;4399;6071;6072;6409;7189;7654;7781	False;False;False;False;False;False;False;False;True;False;False;False;False;False;False;False;False;False;False;False;False;False;False	314;829;830;972;1093;1559;1560;1566;1567;1709;1944;1945;2136;2137;3653;3782;3783;3784;4082;4083;4470;4650;4651;4677;4678;6524;6525;6885;7704;8208;8209;8345	2687;2688;2689;2690;2691;2692;2693;2694;2695;2696;2697;2698;2699;2700;2701;2702;2703;2704;2705;2706;2707;2708;2709;2710;2711;2712;2713;2714;2715;2716;2717;2718;2719;8609;8610;8611;8612;8613;8614;8615;8616;8617;8618;8619;8620;8621;8622;8623;8624;8625;8626;8627;8628;8629;8630;8631;8632;8633;8634;8635;8636;8637;8638;8639;8640;8641;8642;8643;8644;8645;8646;8647;8648;8649;8650;8651;8652;8653;8654;8655…	2815;2816;2817;2818;2819;2820;2821;2822;2823;2824;2825;2826;2827;2828;2829;2830;2831;2832;2833;2834;2835;2836;2837;2838;2839;2840;2841;2842;2843;2844;2845;2846;2847;2848;9069;9070;9071;9072;9073;9074;9075;9076;9077;9078;9079;9080;9081;9082;9083;9084;9085;9086;9087;9088;9089;9090;9091;9092;9093;9094;9095;9096;9097;9098;9099;9100;9101;9102;9103;9104;9105;9106;9107;9108;9109;9110;9111;9112;9113;9114…	2819;9069;9126;11116;13727;19639;19915;21781;24431;26930;48239;49919;53782;53814;58117;59983;60239;80650;80662;85259;94438;100173;101849	527;528;530;531;532;533;534;535;536;556	16;44;47;153;190;227;269;283;305;325
P63267;P63267-2	P63267;P63267-2	23;18	1;1	1;1	Actin, gamma-enteric smooth muscle	ACTG2	Actin, gamma-enteric smooth muscle;Isoform of P63267, Isoform 2 of Actin, gamma-enteric smooth muscle	cytoskeleton	non matrisome	69775000	0	0	0	0	0	69775000		0	2	0	5	1	3	1	4	16				979	298;789;790;909;1037;1478;1482;1614;2017;2563;3435;3558;3836;3837;4200;4372;4399;5785;6409;7189;7653;7780;8801	False;False;False;False;False;False;False;False;False;False;False;False;False;False;False;False;False;True;False;False;False;False;False	314;829;830;959;1096;1097;1098;1559;1560;1564;1565;1709;2136;2137;2715;2716;2717;3654;3782;3783;3784;4082;4083;4469;4648;4649;4677;4678;6219;6885;7704;8206;8207;8344;9414;9415	2687;2688;2689;2690;2691;2692;2693;2694;2695;2696;2697;2698;2699;2700;2701;2702;2703;2704;2705;2706;2707;2708;2709;2710;2711;2712;2713;2714;2715;2716;2717;2718;2719;8609;8610;8611;8612;8613;8614;8615;8616;8617;8618;8619;8620;8621;8622;8623;8624;8625;8626;8627;8628;8629;8630;8631;8632;8633;8634;8635;8636;8637;8638;8639;8640;8641;8642;8643;8644;8645;8646;8647;8648;8649;8650;8651;8652;8653;8654;8655…	2815;2816;2817;2818;2819;2820;2821;2822;2823;2824;2825;2826;2827;2828;2829;2830;2831;2832;2833;2834;2835;2836;2837;2838;2839;2840;2841;2842;2843;2844;2845;2846;2847;2848;9069;9070;9071;9072;9073;9074;9075;9076;9077;9078;9079;9080;9081;9082;9083;9084;9085;9086;9087;9088;9089;9090;9091;9092;9093;9094;9095;9096;9097;9098;9099;9100;9101;9102;9103;9104;9105;9106;9107;9108;9109;9110;9111;9112;9113;9114…	2819;9069;9126;10909;13759;19639;19773;21781;26930;32755;48280;49919;53782;53814;58078;59935;60239;77412;85259;94438;100147;101785;114682	530;532;533;534;546;547;548;549;550;551	45;48;83;177;191;228;270;284;306;326
F5H6T1;P61160;P61160-2	F5H6T1;P61160;P61160-2	2;2;2	2;2;2	2;2;2	Actin-related protein 2	ACTR2	Isoform of P61160, ARP2 actin-related protein 2 homolog (Yeast), isoform CRA_d;Actin-related protein 2;Isoform of P61160, Isoform 2 of Actin-related protein 2	cytoskeleton	non matrisome	0	0	0	0	0	0	0		0	1	0	0	0	0	0	1	2				357	3413;6442	True;True	3631;6921	44733;80437	47912;85640	47912;85640
E9PF58;Q92747-2;Q92747	E9PF58;Q92747-2;Q92747	3;3;3	3;3;3	2;2;2	Actin-related protein 2/3 complex subunit 1A	ARPC1A	Isoform of Q92747, Actin-related protein 2/3 complex subunit 1A;Isoform of Q92747, Isoform 2 of Actin-related protein 2/3 complex subunit 1A;Actin-related protein 2/3 complex subunit 1A	non matrisome	non matrisome	0	0	0	0	0	0	0		0	1	0	0	3	1	0	0	5				317	1353;2362;5945	True;True;True	1432;2497;6385	17131;28331;74461;74462;74463	18324;30271;79328;79329;79330	18324;30271;79328
C9JBJ7;C9K057;C9J4Z7;F8VXW2;C9JEY1;C9JQM8;C9JFG9;C9J6C8;O15143	C9JBJ7;C9K057;C9J4Z7;F8VXW2;C9JEY1;C9JQM8;C9JFG9;C9J6C8;O15143	2;2;2;2;2;2;2;2;2	1;1;1;1;1;1;1;1;1	1;1;1;1;1;1;1;1;1	Actin-related protein 2/3 complex subunit 1B	ARPC1B	Isoform of O15143, Actin-related protein 2/3 complex subunit 1B (Fragment);Isoform of O15143, Actin-related protein 2/3 complex subunit 1B (Fragment);Isoform of O15143, Actin-related protein 2/3 complex subunit 1B (Fragment);Isoform of O15143, Actin-relate	non matrisome	non matrisome	0	0	0	0	0	0	0		0	0	0	0	1	0	0	0	1				204	5945;7723	False;True	6385;8283	74461;74462;74463;94898	79328;79329;79330;101100	79328;101100
O15145;F8VR50;C9JZD1	O15145;F8VR50;C9JZD1	3;2;2	3;2;2	3;2;2	Actin-related protein 2/3 complex subunit 3	ARPC3	Actin-related protein 2/3 complex subunit 3;Isoform of O15145, Actin-related protein 2/3 complex subunit 3 (Fragment);Isoform of O15145, Actin-related protein 2/3 complex subunit 3 (Fragment)	non matrisome	non matrisome	1854500	0	0	0	0	1854500	0		0	2	0	0	1	2	0	0	5				512	1619;4624;7922	True;True;True	1714;4913;8493	20313;20314;58810;58811;97197	21812;21813;62833;62834;103537	21813;62834;103537
F8WDD7;F8WCF6;A0A0A6YYG9;P59998;P59998-2;P59998-3;F8WDW3;F8WE39;R4GN08;H7C0A3;P59998-4	F8WDD7;F8WCF6;A0A0A6YYG9;P59998;P59998-2;P59998-3	3;3;3;3;3;2;1;1;1;1;1	3;3;3;3;3;2;1;1;1;1;1	3;3;3;3;3;2;1;1;1;1;1	Actin-related protein 2/3 complex subunit 4	ARPC4;ARPC4-TTLL3	Isoform of P59998, Actin-related protein 2/3 complex subunit 4;Isoform of A0A0A6YYG9, Actin-related protein 2/3 complex subunit 4;Protein ARPC4-TTLL3;Actin-related protein 2/3 complex subunit 4;Isoform of P59998, Isoform 2 of Actin-related protein 2/3 comp	non matrisome	non matrisome	67643000	0	25151000	0	23004000	19488000	0		0	7	2	4	7	7	0	2	29				83	220;7232;8137	True;True;True	234;7753;8716	1938;1939;1940;1941;1942;1943;1944;1945;1946;1947;1948;1949;1950;1951;1952;89357;89358;89359;89360;99785;99786;99787;99788;99789;99790;99791;99792;99793;99794;99795	2026;2027;2028;2029;2030;2031;2032;2033;2034;2035;2036;2037;2038;2039;2040;95164;95165;95166;95167;106273;106274;106275;106276;106277;106278;106279;106280;106281;106282;106283	2035;95164;106279
Q8NC06-2;K7EM05;Q8NC06;Q8NC06-3	Q8NC06-2;K7EM05;Q8NC06;Q8NC06-3	2;1;1;1	2;1;1;1	2;1;1;1	Acyl-CoA-binding domain-containing protein 4	ACBD4	Isoform of Q8NC06, Isoform 2 of Acyl-CoA-binding domain-containing protein 4;Isoform of Q8NC06, Acyl-CoA binding domain containing 4 isoform 4;Acyl-CoA-binding domain-containing protein 4;Isoform of Q8NC06, Isoform 3 of Acyl-CoA-binding domain-containing p	non matrisome	non matrisome	25441000	0	0	25441000	0	0	0		0	0	4	1	1	0	0	1	7				1152	5906;8298	True;True	6344;8888	74122;74123;101696;101697;101698;101699;101700	78967;78968;108306;108307;108308;108309;108310	78968;108310
Q9NPJ3-2;Q9NPJ3	Q9NPJ3-2;Q9NPJ3	1;1	1;1	1;1	Acyl-coenzyme A thioesterase 13;Acyl-coenzyme A thioesterase 13, N-terminally processed	ACOT13	Isoform of Q9NPJ3, Isoform 2 of Acyl-coenzyme A thioesterase 13;Acyl-coenzyme A thioesterase 13	non matrisome	non matrisome	1995400	0	0	0	1995400	0	0		0	2	0	1	0	0	0	0	3				1225	4141	TRUE	4408	53703;53704	57462;57463;57464	57464
Q8N6G6;Q8N6G6-6;H0YKK1;H0YNQ1;Q8IVU1	Q8N6G6	12;5;1;1;1	12;5;1;1;1	12;5;1;1;1	ADAMTS-like protein 1	ADAMTSL1	ADAMTS-like protein 1	Matrisome-associated	ECM Regulators	202634000	0	94758000	0	23980000	0	83896000		2	13	1	2	18	2	1	13	52				1148	813;814;1674;4368;4655;5394;5768;5870;5929;6719;8357;8594	True;True;True;True;True;True;True;True;True;True;True;True	855;856;1774;4644;4945;5783;6202;6305;6368;7213;8949;9199	9120;9121;21006;21007;55905;55906;55907;55908;55909;55910;55911;55912;55913;55914;55915;55916;55917;55918;58952;58953;58954;67724;67725;67726;72452;72453;72454;72455;72456;72457;72458;72459;72460;72461;73826;73827;73828;73829;73830;73831;73832;73833;73834;73835;73836;73837;74381;74382;74383;83342;102326;102327;105229;105230;105231	9613;9614;22530;22531;59766;59767;59768;59769;59770;59771;59772;59773;59774;59775;59776;59777;59778;59779;62979;62980;62981;72179;72180;72181;77210;77211;77212;77213;77214;77215;77216;77217;77218;77219;78665;78666;78667;78668;78669;78670;78671;78672;78673;78674;78675;78676;79241;79242;79243;88757;108985;108986;111995;111996;111997	9613;9614;22531;59775;62981;72181;77212;78665;79243;88757;108985;111996	689	1278
P82987-2;P82987	P82987-2;P82987	3;3	3;3	3;3	ADAMTS-like protein 3	ADAMTSL3	Isoform of P82987, Isoform 2 of ADAMTS-like protein 3;ADAMTS-like protein 3	Matrisome-associated	ECM Regulators	11694000	0	0	0	0	11694000	0		1	2	0	0	1	4	1	1	10				993	1458;5855;8727	True;True;True	1539;6290;9337	18124;18125;18126;73618;73619;73620;73621;106793;106794;106795	19378;19379;19380;78437;78438;78439;78440;113655;113656;113657	19378;78437;113657
Q6UY14-2;Q6UY14;Q6UY14-3	Q6UY14-2;Q6UY14;Q6UY14-3	3;3;3	3;3;3	3;3;3	ADAMTS-like protein 4	ADAMTSL4	Isoform of Q6UY14, Isoform 2 of ADAMTS-like protein 4;ADAMTS-like protein 4;Isoform of Q6UY14, Isoform 3 of ADAMTS-like protein 4	Matrisome-associated	ECM Regulators	6517100	0	6517100	0	0	0	0		0	2	0	0	1	1	1	1	6				1126	2208;3404;3947	True;True;True	2335;3622;4199	26861;44660;51335;51336;51337;51338	28765;47830;54943;54944;54945;54946	28765;47830;54943
H3BSW3;H3BQF1;H3BQZ9;P07741-2;P07741;H3BQB1	H3BSW3;H3BQF1;H3BQZ9;P07741-2;P07741;H3BQB1	3;3;3;3;3;2	3;3;3;3;3;2	3;3;3;3;3;2	Adenine phosphoribosyltransferase	APRT	Isoform of P07741, Adenine phosphoribosyltransferase;Isoform of P07741, Adenine phosphoribosyltransferase (Fragment);Isoform of P07741, Adenine phosphoribosyltransferase;Isoform of P07741, Isoform 2 of Adenine phosphoribosyltransferase;Adenine phosphoribos	non matrisome	non matrisome	0	0	0	0	0	0	0		0	1	0	0	2	0	0	1	4				429	41;153;6768	True;True;True	42;163;7262	386;387;1586;83614	396;397;1666;89043	396;1666;89043
Q5T9B7;P00568	Q5T9B7;P00568	1;1	1;1	1;1	Adenylate kinase isoenzyme 1	AK1	Isoform of P00568, Adenylate kinase isoenzyme 1;Adenylate kinase isoenzyme 1	non matrisome	non matrisome	0	0	0	0	0	0	0		0	2	0	1	2	1	1	0	7				576	3854	TRUE	4101	50385;50386;50387;50388;50389;50390;50391	53953;53954;53955;53956;53957;53958;53959	53954
Q01518-2;Q01518;Q5T0R7;Q5T0R6;Q5T0R5;Q5T0R4;Q5T0R3;Q5T0R2;Q5T0R1;Q5T0R9;B7Z385;A0A087X0J3;A0A087WZ15;E9PDI2;P40123-3;P40123-2;P40123	Q01518-2;Q01518;Q5T0R7;Q5T0R6;Q5T0R5;Q5T0R4;Q5T0R3;Q5T0R2;Q5T0R1;Q5T0R9	4;4;2;2;2;2;2;2;2;2;1;1;1;1;1;1;1	4;4;2;2;2;2;2;2;2;2;1;1;1;1;1;1;1	4;4;2;2;2;2;2;2;2;2;1;1;1;1;1;1;1	Adenylyl cyclase-associated protein 1;Adenylyl cyclase-associated protein	CAP1	Isoform of Q01518, Isoform 2 of Adenylyl cyclase-associated protein 1;Adenylyl cyclase-associated protein 1;Isoform of Q01518, Adenylyl cyclase-associated protein 1 (Fragment);Isoform of Q01518, Adenylyl cyclase-associated protein 1 (Fragment);Isoform of Q	non matrisome	non matrisome	4612900	0	0	0	0	4612900	0		0	4	0	2	1	4	0	1	12				1004	483;4233;4994;8273	True;True;True;True	505;4504;5308;8863	5217;54668;54669;54670;63134;63135;63136;101331;101332;101333;101334;101335	5500;58471;58472;58473;67359;67360;67361;107916;107917;107918;107919;107920	5500;58472;67360;107916
Q8IUX7;Q8IUX7-2;H7C0W8;H7C4B5;H7C391;Q8N436	Q8IUX7;Q8IUX7-2	16;14;2;1;1;1	16;14;2;1;1;1	16;14;2;1;1;1	Adipocyte enhancer-binding protein 1	AEBP1	Adipocyte enhancer-binding protein 1;Isoform of Q8IUX7, Isoform 2 of Adipocyte enhancer-binding protein 1	Core matrisome	ECM Glycoproteins	494210000	0	113980000	0	141990000	123380000	114860000		1	18	1	24	28	24	8	16	120				1138	387;1643;1761;2549;2626;2819;3927;5199;5628;6960;7229;7252;7601;8495;8611;8767	True;True;True;True;True;True;True;True;True;True;True;True;True;True;True;True	405;1738;1867;2701;2788;2998;4179;5521;6051;7463;7750;7774;8151;9099;9216;9377	3995;3996;3997;3998;20653;20654;20655;20656;20657;20658;20659;20660;20661;20662;20663;20664;22090;22091;22092;22093;22094;22095;22096;22097;22098;22099;22100;22101;22102;22103;22104;22105;22106;22107;22108;22109;22110;22111;22112;22113;22114;22115;22116;22117;30548;31514;31515;31516;31517;31518;31519;31520;31521;31522;34011;51191;51192;51193;51194;51195;65277;65278;65279;65280;65281;65282;65283;6…	4217;4218;4219;4220;22163;22164;22165;22166;22167;22168;22169;22170;22171;22172;22173;22174;23672;23673;23674;23675;23676;23677;23678;23679;23680;23681;23682;23683;23684;23685;23686;23687;23688;23689;23690;23691;23692;23693;23694;23695;23696;23697;23698;23699;23700;32625;33641;33642;33643;33644;33645;33646;33647;33648;33649;36293;54795;54796;54797;54798;54799;69592;69593;69594;69595;69596;69597;6…	4217;22172;23695;32625;33645;36293;54799;69593;75709;91256;95137;95343;99478;110966;112167;114107
Q15847	Q15847	1	1	1	Adipogenesis regulatory factor	ADIRF	Adipogenesis regulatory factor	non matrisome	non matrisome	45313000	0	0	0	0	0	45313000		2	4	0	3	3	2	3	3	20				1090	7225	TRUE	7746	89307;89308;89309;89310;89311;89312;89313;89314;89315;89316;89317;89318;89319;89320;89321;89322;89323;89324;89325	95110;95111;95112;95113;95114;95115;95116;95117;95118;95119;95120;95121;95122;95123;95124;95125;95126;95127;95128;95129	95117
P12235;V9GYG0	P12235;V9GYG0	11;10	6;6	5;5	ADP/ATP translocase 1	SLC25A4	ADP/ATP translocase 1;Isoform of P12235, ADP/ATP translocase 1	non matrisome	non matrisome	227845000	58231000	48769000	0	47795000	35282000	37768000		6	13	0	8	2	9	1	7	46				716	88;1268;1881;2165;2736;2778;3142;4732;6167;7234;8677	True;True;True;True;False;True;False;False;True;False;False	93;1342;1991;2288;2907;2951;3343;5022;6628;7755;9285	813;814;815;816;817;818;819;820;821;16215;16216;16217;16218;16219;16220;16221;16222;16223;16224;16225;16226;16227;23024;26398;26399;26400;26401;26402;26403;26404;26405;26406;26407;32561;32562;32563;32564;32565;32566;32567;32568;32569;32570;32571;32572;32573;32574;32575;32576;32577;32578;32579;32580;32581;32582;32907;32908;32909;32910;32911;39416;39417;39418;39419;39420;39421;39422;39423;39424;394…	849;850;851;852;853;854;855;856;857;17369;17370;17371;17372;17373;17374;17375;17376;17377;17378;17379;17380;17381;17382;24648;28287;28288;28289;28290;28291;28292;28293;28294;28295;28296;34748;34749;34750;34751;34752;34753;34754;34755;34756;34757;34758;34759;34760;34761;34762;34763;34764;34765;34766;34767;34768;34769;35112;35113;35114;35115;35116;42163;42164;42165;42166;42167;42168;42169;42170;421…	852;17371;24648;28295;34751;35113;42170;63828;82025;95174;112979
P05141;Q9H0C2	P05141	12;3	12;3	4;0	ADP/ATP translocase 2;ADP/ATP translocase 2, N-terminally processed	SLC25A5	ADP/ATP translocase 2	non matrisome	non matrisome	1314440000	208380000	270830000	237080000	346850000	142430000	108870000		10	29	17	28	13	14	7	10	128				645	87;1267;2168;2736;3070;3142;3321;4732;6124;7234;7269;8677	True;True;True;True;True;True;True;True;True;True;True;True	92;1341;2291;2907;3265;3343;3534;5022;6584;7755;7792;9285	805;806;807;808;809;810;811;812;16203;16204;16205;16206;16207;16208;16209;16210;16211;16212;16213;16214;26431;26432;26433;26434;26435;26436;26437;26438;26439;26440;26441;26442;26443;26444;26445;26446;26447;26448;26449;26450;26451;26452;26453;26454;26455;26456;32561;32562;32563;32564;32565;32566;32567;32568;32569;32570;32571;32572;32573;32574;32575;32576;32577;32578;32579;32580;32581;32582;38508;3…	841;842;843;844;845;846;847;848;17357;17358;17359;17360;17361;17362;17363;17364;17365;17366;17367;17368;28321;28322;28323;28324;28325;28326;28327;28328;28329;28330;28331;28332;28333;28334;28335;28336;28337;28338;28339;28340;28341;28342;28343;28344;28345;28346;34748;34749;34750;34751;34752;34753;34754;34755;34756;34757;34758;34759;34760;34761;34762;34763;34764;34765;34766;34767;34768;34769;41197;4…	846;17363;28334;34751;41199;42170;46684;63828;81498;95174;95652;112979
P12236	P12236	11	2	2	ADP/ATP translocase 3;ADP/ATP translocase 3, N-terminally processed	SLC25A6	ADP/ATP translocase 3	non matrisome	non matrisome	20900000	0	0	0	20900000	0	0		0	1	0	0	0	0	0	0	1				717	88;1266;2168;2736;3070;3142;4732;6124;7234;7320;8677	False;True;False;False;False;False;False;False;False;True;False	93;1340;2291;2907;3265;3343;5022;6584;7755;7848;9285	813;814;815;816;817;818;819;820;821;16199;16200;16201;16202;26431;26432;26433;26434;26435;26436;26437;26438;26439;26440;26441;26442;26443;26444;26445;26446;26447;26448;26449;26450;26451;26452;26453;26454;26455;26456;32561;32562;32563;32564;32565;32566;32567;32568;32569;32570;32571;32572;32573;32574;32575;32576;32577;32578;32579;32580;32581;32582;38508;38509;38510;39416;39417;39418;39419;39420;394…	849;850;851;852;853;854;855;856;857;17353;17354;17355;17356;28321;28322;28323;28324;28325;28326;28327;28328;28329;28330;28331;28332;28333;28334;28335;28336;28337;28338;28339;28340;28341;28342;28343;28344;28345;28346;34748;34749;34750;34751;34752;34753;34754;34755;34756;34757;34758;34759;34760;34761;34762;34763;34764;34765;34766;34767;34768;34769;41197;41198;41199;42163;42164;42165;42166;42167;421…	852;17354;28334;34751;41199;42170;63828;81498;95174;96008;112979
P84077;P61204;F5H423;P61204-2;F5H0C7;C9J1Z8;P84085;F5H1V1;F5H6T5;F8WDB3;H0YGG7;C9JPM4;P18085	P84077;P61204;F5H423;P61204-2;F5H0C7;C9J1Z8;P84085	4;4;3;3;2;2;2;1;1;1;1;1;1	4;4;3;3;2;2;2;1;1;1;1;1;1	4;4;3;3;2;2;2;1;1;1;1;1;1	ADP-ribosylation factor 1;ADP-ribosylation factor 3;ADP-ribosylation factor 5	ARF1;ARF3;ARF5	ADP-ribosylation factor 1;ADP-ribosylation factor 3;Uncharacterized protein;Isoform of P61204, Isoform 2 of ADP-ribosylation factor 3;Isoform of P61204, ADP-ribosylation factor 3 (Fragment);Isoform of P84085, ADP-ribosylation factor 5 (Fragment);ADP-ribosy	non matrisome	non matrisome	90619000	28056000	0	0	26522000	19265000	16776000		2	5	0	7	2	4	0	3	23				937	1200;3923;5533;6037	True;True;True;True	1271;4174;4175;5945;6487	15621;15622;15623;15624;15625;51155;51156;51157;51158;51159;51160;51161;51162;51163;51164;51165;51166;51167;51168;51169;51170;69625;69626;69627;75303;75304	16734;16735;16736;16737;16738;54759;54760;54761;54762;54763;54764;54765;54766;54767;54768;54769;54770;54771;54772;54773;54774;74237;74238;74239;80202;80203	16734;54763;74237;80202	539	22
B4DZG7;F8VYN9;P40616-2;P40616	B4DZG7;F8VYN9;P40616-2;P40616	1;1;1;1	1;1;1;1	1;1;1;1	ADP-ribosylation factor-like protein 1	ARL1	Isoform of P40616, ADP-ribosylation factor-like protein 1;Isoform of P40616, ADP-ribosylation factor-like protein 1;Isoform of P40616, Isoform 2 of ADP-ribosylation factor-like protein 1;ADP-ribosylation factor-like protein 1	non matrisome	non matrisome	2981800	0	0	0	2981800	0	0		0	0	0	1	0	0	0	0	1				182	6742	TRUE	7236	83467	88892	88892
Q9NVJ2;Q96BM9	Q9NVJ2;Q96BM9	1;1	1;1	1;1	ADP-ribosylation factor-like protein 8B;ADP-ribosylation factor-like protein 8A	ARL8B;ARL8A	ADP-ribosylation factor-like protein 8B;ADP-ribosylation factor-like protein 8A	non matrisome	non matrisome	2398100	0	0	0	0	0	2398100		1	1	0	1	0	1	0	1	5				1177	5914	TRUE	6353	74161;74162;74163;74164;74165	79006;79007;79008;79009;79010	79009
A0A087X1T7;H0YM81;E7EX88;P16112-2;P16112;H0YK70;Q6PID9;E7ENV9;P16112-3	A0A087X1T7;H0YM81;E7EX88;P16112-2;P16112;H0YK70;Q6PID9;E7ENV9;P16112-3	4;4;4;4;4;2;2;2;2	4;4;4;4;4;2;2;2;2	4;4;4;4;4;2;2;2;2	Aggrecan core protein;Aggrecan core protein 2	ACAN	Isoform of P16112, Aggrecan core protein;Isoform of P16112, Aggrecan core protein;Isoform of P16112, Aggrecan core protein;Isoform of P16112, Isoform 2 of Aggrecan core protein;Aggrecan core protein;Isoform of P16112, Aggrecan core protein (Fragment);Isofo	Core matrisome	Proteoglycans	0	0	0	0	0	0	0		0	0	0	0	4	0	0	0	4				55	653;1577;8811;8861	True;True;True;True	690;1667;9425;9475	7084;19866;107966;108559;108560	7461;21339;114891;115512;115513	7461;21339;114891;115512
O00468-6;O00468-3;O00468-5;O00468-4;O00468-7;O00468;A0A087X208;O00468-2	O00468-6;O00468-3;O00468-5;O00468-4;O00468-7;O00468;A0A087X208;O00468-2	6;6;6;6;6;6;4;4	6;6;6;6;6;6;4;4	6;6;6;6;6;6;4;4	Agrin;Agrin N-terminal 110 kDa subunit;Agrin C-terminal 110 kDa subunit;Agrin C-terminal 90 kDa fragment;Agrin C-terminal 22 kDa fragment	AGRN	Isoform of O00468, Isoform 6 of Agrin;Isoform of O00468, Isoform 3 of Agrin;Isoform of O00468, Isoform 5 of Agrin;Isoform of O00468, Isoform 4 of Agrin;Isoform of O00468, Isoform 7 of Agrin;Agrin;Isoform of O00468, Agrin;Isoform of O00468, Isoform 2 of Agr	Core matrisome	ECM Glycoproteins	0	0	0	0	0	0	0		0	2	0	0	5	1	0	1	9				496	1729;2216;2434;2527;3119;8485	True;True;True;True;True;True	1834;2343;2577;2679;3314;9088	21747;21748;21749;26924;29275;30248;30249;30250;39084;104146;104147	23311;23312;23313;28828;31295;32309;32310;32311;41819;110882;110883	23311;28828;31295;32310;41819;110882
Q02952-3;Q02952-2;Q02952	Q02952-3;Q02952-2;Q02952	2;2;2	2;2;2	2;2;2	A-kinase anchor protein 12	AKAP12	Isoform of Q02952, Isoform 3 of A-kinase anchor protein 12;Isoform of Q02952, Isoform 2 of A-kinase anchor protein 12;A-kinase anchor protein 12	non matrisome	non matrisome	12149000	0	0	0	0	0	12149000		0	0	0	1	1	0	0	2	4				1012	74;5752	True;True	78;6185	705;72348;72349;72350	739;77092;77093;77094	739;77093
P05091-2;P05091;S4R3S4;H0Y2X5;H0YMG7;O94788-4;O94788-2;O94788-3;P00352;P47895;P30837;O94788	P05091-2;P05091	3;3;1;1;1;1;1;1;1;1;1;1	3;3;1;1;1;1;1;1;1;1;1;1	3;3;1;1;1;1;1;1;1;1;1;1	Aldehyde dehydrogenase, mitochondrial	ALDH2	Isoform of P05091, Isoform 2 of Aldehyde dehydrogenase, mitochondrial;Aldehyde dehydrogenase, mitochondrial	non matrisome	non matrisome	6699800	0	6699800	0	0	0	0		2	4	0	2	0	0	1	1	10				643	6605;7321;8072	True;True;True	7091;7849;8649	82231;82232;82233;82234;82235;82236;82237;90143;98922;98923	87564;87565;87566;87567;87568;87569;87570;96009;105365;105366	87569;96009;105365
P26572;D6RF69;D6RA48;D6RBS3;D6RAK2;D6R9U2;D6RD15;D6RB69;D6RHZ8	P26572;D6RF69	4;2;1;1;1;1;1;1;1	4;2;1;1;1;1;1;1;1	4;2;1;1;1;1;1;1;1	Alpha-1,3-mannosyl-glycoprotein 2-beta-N-acetylglucosaminyltransferase	MGAT1	Alpha-1,3-mannosyl-glycoprotein 2-beta-N-acetylglucosaminyltransferase;Isoform of P26572, Alpha-1,3-mannosyl-glycoprotein 2-beta-N-acetylglucosaminyltransferase (Fragment)	non matrisome	non matrisome	163923000	0	54864000	0	27023000	48065000	33971000		0	7	4	6	8	7	5	5	42				799	1783;3035;4326;8561	True;True;True;True	1890;3229;4599;9166	22276;22277;38014;38015;38016;38017;38018;38019;38020;38021;38022;38023;38024;38025;38026;38027;38028;38029;38030;38031;38032;38033;38034;55289;104766;104767;104768;104769;104770;104771;104772;104773;104774;104775;104776;104777;104778;104779;104780;104781	23874;23875;40688;40689;40690;40691;40692;40693;40694;40695;40696;40697;40698;40699;40700;40701;40702;40703;40704;40705;40706;40707;40708;40709;59128;111519;111520;111521;111522;111523;111524;111525;111526;111527;111528;111529;111530;111531;111532;111533;111534;111535	23875;40697;59128;111529
P19652;P02763	P19652	3;1	3;1	3;1	Alpha-1-acid glycoprotein 2	ORM2	Alpha-1-acid glycoprotein 2	non matrisome	non matrisome	8813800	0	0	0	0	8813800	0		0	1	0	1	0	3	3	0	8				758	5729;7293;7491	True;True;True	6160;7819;8028	72083;89991;89992;89993;89994;89995;89996;89997;92143;92144;92145	76800;95847;95848;95849;95850;95851;95852;95853;98173;98174;98175	76800;95848;98173
P01011;G3V595;G3V3A0;P01011-2;A0A087WY93	P01011;G3V595	13;8;6;6;1	13;8;6;6;1	13;8;6;6;1	Alpha-1-antichymotrypsin;Alpha-1-antichymotrypsin His-Pro-less	SERPINA3	Alpha-1-antichymotrypsin;Isoform of P01011, Alpha-1-antichymotrypsin (Fragment)	Matrisome-associated	ECM Regulators	1093590000	137170000	206650000	197270000	141660000	243050000	167790000		7	27	12	20	27	25	15	26	159				583	141;802;1424;1984;2176;2177;4137;4636;5233;5288;5541;6483;8576	True;True;True;True;True;True;True;True;True;True;True;True;True	151;842;1505;2100;2300;2301;4404;4925;5556;5630;5631;5632;5953;6962;9181	1502;8839;8840;8841;8842;8843;8844;8845;8846;8847;8848;8849;8850;8851;8852;8853;8854;8855;8856;8857;8858;8859;8860;8861;8862;8863;8864;8865;8866;8867;8868;8869;8870;17773;17774;24546;24547;24548;24549;24550;24551;24552;24553;24554;24555;24556;24557;24558;24559;24560;24561;26505;26506;26507;26508;26509;26510;26511;26512;26513;26514;26515;26516;26517;26518;26519;26520;26521;26522;26523;26524;26525;…	1577;9324;9325;9326;9327;9328;9329;9330;9331;9332;9333;9334;9335;9336;9337;9338;9339;9340;9341;9342;9343;9344;9345;9346;9347;9348;9349;9350;9351;9352;9353;9354;9355;19012;19013;26304;26305;26306;26307;26308;26309;26310;26311;26312;26313;26314;26315;26316;26317;26318;26319;28395;28396;28397;28398;28399;28400;28401;28402;28403;28404;28405;28406;28407;28408;28409;28410;28411;28412;28413;28414;28415;…	1577;9325;19013;26305;28398;28430;57414;62896;69993;70919;74297;86070;111832	227;228;229;230;231	204;205;219;284;290
P01009;P01009-2;P01009-3;G3V2B9;G3V5R8;G3V387;A0A0B4J278;G3V544	P01009;P01009-2;P01009-3	14;11;7;2;1;1;1;1	14;11;7;2;1;1;1;1	1;1;1;0;0;0;0;0	Alpha-1-antitrypsin;Short peptide from AAT	SERPINA1	Alpha-1-antitrypsin;Isoform of P01009, Isoform 2 of Alpha-1-antitrypsin;Isoform of P01009, Isoform 3 of Alpha-1-antitrypsin	Matrisome-associated	ECM Regulators	4545460000	688430000	819240000	1203700000	523540000	668070000	642480000		19	41	29	33	37	38	27	37	261				582	807;1624;2482;4142;4922;5020;5052;5234;5794;6131;6639;6995;7159;7947	True;True;True;True;True;True;True;True;True;True;True;True;True;True	847;1719;2630;4409;5232;5334;5368;5369;5557;6228;6591;7128;7498;7669;8519	8934;8935;8936;8937;8938;8939;8940;8941;8942;8943;20330;20331;20332;20333;20334;20335;20336;20337;20338;20339;20340;20341;20342;29802;29803;29804;29805;29806;29807;29808;29809;53705;53706;53707;53708;53709;53710;62258;62259;62260;62261;62262;62263;62264;62265;62266;62267;62268;62269;62270;62271;62272;62273;62274;62275;62276;62277;62278;62279;62280;62281;62282;62283;62284;62285;62286;62287;62288;6…	9421;9422;9423;9424;9425;9426;9427;9428;9429;9430;21831;21832;21833;21834;21835;21836;21837;21838;21839;21840;21841;21842;21843;31857;31858;31859;31860;31861;31862;31863;31864;57465;57466;57467;57468;57469;57470;66433;66434;66435;66436;66437;66438;66439;66440;66441;66442;66443;66444;66445;66446;66447;66448;66449;66450;66451;66452;66453;66454;66455;66456;66457;66458;66459;66460;66461;66462;66463;6…	9421;21836;31863;57466;66434;67758;67965;70001;77531;81525;88120;91562;93814;103756	0;1	266;398
C9JMH6;A0A0J9YY65;A0A0G2JPA8;P08697-2;P08697;CON__P28800;C9JPV4;A0A0J9YWQ3	C9JMH6;A0A0J9YY65;A0A0G2JPA8;P08697-2;P08697;CON__P28800	4;4;4;4;4;2;1;1	4;4;4;4;4;2;1;1	4;4;4;4;4;2;1;1	Alpha-2-antiplasmin	SERPINF2	Isoform of P08697, Alpha-2-antiplasmin (Fragment);Isoform of P08697, Alpha-2-antiplasmin (Fragment);Isoform of P08697, Alpha-2-antiplasmin;Isoform of P08697, Isoform 2 of Alpha-2-antiplasmin;Alpha-2-antiplasmin;	Matrisome-associated	ECM Regulators	528770000	70701000	60311000	0	149730000	161380000	86648000		3	2	1	8	6	11	5	6	42			+	119	1803;2382;4366;6048	True;True;True;True	1911;2519;4642;6500	22536;22537;22538;22539;22540;22541;22542;22543;22544;22545;22546;22547;22548;22549;22550;22551;22552;22553;22554;22555;22556;22557;22558;22559;28612;55856;55857;55858;55859;55860;55861;55862;55863;55864;55865;55866;55867;55868;75439;75440;75441;75442;75443;75444;75445;75446;75447;75448;75449;75450	24151;24152;24153;24154;24155;24156;24157;24158;24159;24160;24161;24162;24163;24164;24165;24166;24167;24168;24169;24170;24171;24172;24173;24174;30562;59717;59718;59719;59720;59721;59722;59723;59724;59725;59726;59727;59728;59729;80344;80345;80346;80347;80348;80349;80350;80351;80352;80353;80354;80355	24165;30562;59719;80345
C9JV77;P02765	C9JV77;P02765	3;3	3;3	3;3	Alpha-2-HS-glycoprotein;Alpha-2-HS-glycoprotein chain A;Alpha-2-HS-glycoprotein chain B	AHSG	Isoform of P02765, Alpha-2-HS-glycoprotein;Alpha-2-HS-glycoprotein	non matrisome	non matrisome	19677000	0	0	0	0	0	19677000		1	2	1	1	2	1	1	2	11				226	1963;2613;3600	True;True;True	2075;2775;3833	24250;24251;24252;24253;24254;24255;24256;24257;24258;24259;31393;47362	25978;25979;25980;25981;25982;25983;25984;25985;25986;25987;33517;50772	25982;33517;50772
P01023;P20742-2;P20742;H0YFH1;F8W7L3	P01023	21;2;2;1;1	21;2;2;1;1	18;2;2;1;1	Alpha-2-macroglobulin	A2M	Alpha-2-macroglobulin	Matrisome-associated	ECM Regulators	291055000	72374000	22286000	0	62927000	57571000	75897000		7	4	0	16	13	15	2	13	70				584	386;473;784;1491;2409;2809;4717;4863;5461;5648;5876;5960;6081;6098;6640;6690;7303;7846;8383;8391;8640	True;True;True;True;True;True;True;True;True;True;True;True;True;True;True;True;True;True;True;True;True	404;495;824;1577;2549;2987;5007;5166;5870;6072;6311;6400;6534;6554;7129;7182;7829;8415;8975;8984;9248	3993;3994;5112;5113;5114;5115;8562;8563;8564;8565;8566;8567;8568;18680;29039;29040;29041;29042;29043;33331;59508;61390;68701;68702;68703;68704;71224;73894;74533;75811;75812;75813;75814;76007;76008;76009;76010;76011;76012;82731;83106;83107;83108;90039;90040;90041;90042;90043;90044;96376;102561;102562;102563;102564;102565;102566;102567;102568;102569;102570;102571;102572;102573;102574;102647;102648;…	4215;4216;5394;5395;5396;5397;9020;9021;9022;9023;9024;9025;9026;20014;31038;31039;31040;31041;31042;35560;63554;65506;73258;73259;73260;73261;75888;78733;79404;80737;80738;80739;80740;80943;80944;80945;80946;80947;80948;88123;88508;88509;88510;95899;95900;95901;95902;95903;95904;102669;109235;109236;109237;109238;109239;109240;109241;109242;109243;109244;109245;109246;109247;109248;109323;109324…	4216;5396;9024;20014;31042;35560;63554;65506;73259;75888;78733;79404;80739;80943;88123;88509;95902;102669;109245;109325;112514
P12814-2;P12814;P12814-3;P12814-4;H9KV75;G3V2W4;G3V2N5;G3V2X9;H7C5W8;G3V5M4;G3V2E8;H0YJ11;H0YJW3;F6THM6;G3V380	P12814-2;P12814;P12814-3;P12814-4;H9KV75	25;25;25;24;23;12;12;6;5;4;3;3;3;2;1	25;25;25;24;23;12;12;6;5;4;3;3;3;2;1	12;12;12;11;11;5;6;2;3;1;0;1;1;0;1	Alpha-actinin-1	ACTN1	Isoform of P12814, Isoform 2 of Alpha-actinin-1;Alpha-actinin-1;Isoform of P12814, Isoform 3 of Alpha-actinin-1;Isoform of P12814, Isoform 4 of Alpha-actinin-1;Isoform of P12814, Alpha-actinin-1	cytoskeleton	non matrisome	639426000	50499000	100380000	82070000	102320000	85677000	218480000		3	17	5	15	15	13	15	42	125				722	334;391;429;685;1063;1231;1713;1935;2344;3417;3575;4305;4332;4333;4695;5034;5194;5331;5405;5714;5735;7359;7442;8014;8096	True;True;True;True;True;True;True;True;True;True;True;True;True;True;True;True;True;True;True;True;True;True;True;True;True	352;410;450;723;1127;1303;1816;2045;2478;3636;3802;4578;4606;4607;4985;5348;5349;5516;5690;5691;5797;6143;6167;7891;7975;8587;8674	3106;3107;3108;3109;3110;3111;3112;3113;3114;3115;3116;4072;4073;4074;4075;4608;4609;7457;7458;7459;7460;7461;7462;7463;7464;7465;7466;7467;13849;13850;13851;13852;13853;15799;15800;15801;15802;15803;15804;21615;21616;21617;21618;21619;21620;23624;23625;23626;23627;23628;23629;28120;28121;28122;28123;28124;28125;44784;46772;46773;46774;55139;55140;55141;55142;55143;55144;55381;55382;55383;55384;5…	3258;3259;3260;3261;3262;3263;3264;3265;3266;3267;3268;4296;4297;4298;4299;4860;4861;7858;7859;7860;7861;7862;7863;7864;7865;7866;7867;7868;14773;14774;14775;14776;14777;14778;16929;16930;16931;16932;16933;16934;23176;23177;23178;23179;23180;23181;25292;25293;25294;25295;25296;25297;30054;30055;30056;30057;30058;30059;47965;50094;50095;50096;58974;58975;58976;58977;58978;58979;59224;59225;59226;5…	3258;4297;4860;7862;14777;16932;23177;25293;30059;47965;50095;58978;59227;59232;63387;67837;69558;71425;72423;76588;76888;96521;97590;104754;105661	206;367;368;369	221;239;354;360
P35609-2;P35609	P35609-2;P35609	7;7	1;1	0;0	Alpha-actinin-2	ACTN2	Isoform of P35609, Isoform 2 of Alpha-actinin-2;Alpha-actinin-2	cytoskeleton	non matrisome	0	0	0	0	0	0	0		0	0	0	0	0	0	1	0	1				842	335;1063;1935;2344;3417;5194;7359	True;False;False;False;False;False;False	353;1127;2045;2478;3636;5516;7891	3117;13849;13850;13851;13852;13853;23624;23625;23626;23627;23628;23629;28120;28121;28122;28123;28124;28125;44784;65246;65247;65248;65249;65250;65251;65252;65253;90630;90631	3269;14773;14774;14775;14776;14777;14778;25292;25293;25294;25295;25296;25297;30054;30055;30056;30057;30058;30059;47965;69555;69556;69557;69558;69559;69560;69561;69562;96521;96522	3269;14777;25293;30059;47965;69558;96521
O43707;O43707-2;F5GXS2;O43707-3;K7EJH8;H7C144;K7EP19	O43707;O43707-2	18;10;6;6;4;4;2	6;3;3;3;1;2;1	5;3;3;3;1;2;1	Alpha-actinin-4	ACTN4	Alpha-actinin-4;Isoform of O43707, Isoform ACTN4ISO of Alpha-actinin-4	cytoskeleton	non matrisome	52958000	0	0	0	20586000	0	32372000		0	2	1	4	1	1	1	5	15				523	333;391;429;685;1063;1323;1935;2252;2344;3026;3417;4332;4333;5193;7359;7442;8014;8095	True;False;False;False;False;True;False;True;False;True;False;False;False;True;False;False;False;True	351;410;450;723;1127;1401;2045;2380;2478;3220;3636;4606;4607;5515;7891;7975;8587;8673	3099;3100;3101;3102;3103;3104;3105;4072;4073;4074;4075;4608;4609;7457;7458;7459;7460;7461;7462;7463;7464;7465;7466;7467;13849;13850;13851;13852;13853;16904;16905;16906;23624;23625;23626;23627;23628;23629;27326;28120;28121;28122;28123;28124;28125;37954;44784;55381;55382;55383;55384;55385;55386;55387;55388;55389;65245;90630;90631;91581;91582;91583;91584;91585;91586;91587;91588;91589;98342;98343;983…	3251;3252;3253;3254;3255;3256;3257;4296;4297;4298;4299;4860;4861;7858;7859;7860;7861;7862;7863;7864;7865;7866;7867;7868;14773;14774;14775;14776;14777;14778;18082;18083;18084;25292;25293;25294;25295;25296;25297;29238;30054;30055;30056;30057;30058;30059;40627;47965;59224;59225;59226;59227;59228;59229;59230;59231;59232;69553;69554;96521;96522;97589;97590;97591;97592;97593;97594;97595;97596;97597;104…	3256;4297;4860;7862;14777;18083;25293;29238;30059;40627;47965;59227;59232;69553;96521;97590;104754;105659	206	258
D6RF25;A0A0A0MSR2;E7EV99;E7ENY0;P35611-5;P35611-2;P35611-6;P35611-4;P35611;P35611-3	D6RF25;A0A0A0MSR2;E7EV99;E7ENY0;P35611-5;P35611-2;P35611-6;P35611-4;P35611;P35611-3	1;1;1;1;1;1;1;1;1;1	1;1;1;1;1;1;1;1;1;1	1;1;1;1;1;1;1;1;1;1	Alpha-adducin	ADD1	Isoform of P35611, Alpha-adducin (Fragment);Isoform of P35611, Alpha-adducin;Isoform of P35611, Alpha-adducin;Isoform of P35611, Alpha-adducin;Isoform of P35611, Isoform 5 of Alpha-adducin;Isoform of P35611, Isoform 2 of Alpha-adducin;Isoform of P35611, Is	non matrisome	non matrisome	7669600	0	0	0	7669600	0	0		0	0	0	3	0	0	0	0	3				78	3972	TRUE	4227	51722;51723	55377;55378;55379	55378
E9PR44;P02511;A0A024R3B9;E9PJL7;E9PRA8;E9PNH7;E9PS12;H0YCW8;E9PRS4	E9PR44;P02511;A0A024R3B9;E9PJL7;E9PRA8;E9PNH7	10;10;7;7;7;6;3;3;2	10;10;7;7;7;6;3;3;2	10;10;7;7;7;6;3;3;2	Alpha-crystallin B chain	CRYAB	Isoform of P02511, Alpha-crystallin B chain (Fragment);Alpha-crystallin B chain;Isoform of P02511, Alpha-crystallin B chain;Isoform of P02511, Alpha-crystallin B chain (Fragment);Isoform of P02511, Alpha-crystallin B chain;Isoform of P02511, Alpha-crystall	non matrisome	non matrisome	652975000	0	157980000	202450000	118300000	101170000	73075000		2	21	9	20	27	12	1	10	102				345	587;1561;2611;3486;5284;5767;6506;7444;8124;8827	True;True;True;True;True;True;True;True;True;True	619;620;1650;2773;3706;5623;5624;6201;6988;7977;8702;9441	6444;6445;6446;6447;6448;6449;6450;6451;6452;6453;6454;6455;6456;6457;6458;6459;6460;6461;6462;6463;6464;6465;6466;6467;6468;6469;19631;19632;19633;19634;19635;19636;19637;19638;19639;19640;19641;19642;19643;31379;31380;31381;31382;31383;31384;31385;31386;31387;31388;31389;31390;31391;45731;45732;45733;45734;45735;45736;45737;45738;45739;66455;66456;66457;66458;72448;72449;72450;72451;81145;81146…	6810;6811;6812;6813;6814;6815;6816;6817;6818;6819;6820;6821;6822;6823;6824;6825;6826;6827;6828;6829;6830;6831;6832;6833;6834;6835;21089;21090;21091;21092;21093;21094;21095;21096;21097;21098;21099;21100;21101;33503;33504;33505;33506;33507;33508;33509;33510;33511;33512;33513;33514;33515;48976;48977;48978;48979;48980;48981;48982;48983;48984;70832;70833;70834;70835;70836;77206;77207;77208;77209;86413…	6822;21098;33510;48983;70835;77207;86413;97607;106154;115098	151;152	1;68
P06733;P06733-2;K7EM90;F5H1C3;E5RI09;E5RG95;K7EPM1;K7EKN2;E5RGZ4;F5H0C8;P13929-3;P09104-2;P13929-2;P13929;P09104	P06733;P06733-2	14;10;6;1;1;1;1;1;1;1;1;1;1;1;1	14;10;6;1;1;1;1;1;1;1;1;1;1;1;1	14;10;6;1;1;1;1;1;1;1;1;1;1;1;1	Alpha-enolase	ENO1	Alpha-enolase;Isoform of P06733, Isoform MBP-1 of Alpha-enolase	non matrisome	non matrisome	708232000	0	167910000	423650000	97646000	19026000	0		0	19	17	19	2	3	1	1	62				661	82;83;1195;2614;3510;3715;3781;4324;4793;4837;6663;8233;8483;8734	True;True;True;True;True;True;True;True;True;True;True;True;True;True	87;88;1266;2776;3733;3950;4021;4597;5091;5137;7155;8822;9085;9086;9344	792;793;794;15595;15596;15597;15598;15599;15600;15601;15602;15603;15604;15605;31394;31395;46094;46095;46096;46097;46098;48476;48477;48478;48479;49382;49383;49384;49385;49386;49387;55282;55283;55284;55285;55286;55287;60698;60699;61106;61107;82938;82939;82940;82941;82942;100741;100742;100743;100744;100745;100746;100747;100748;104013;104014;106825;106826;106827;106828;106829;106830	827;828;829;830;16707;16708;16709;16710;16711;16712;16713;16714;16715;16716;16717;16718;33518;33519;49393;49394;49395;49396;49397;49398;51930;51931;51932;51933;52906;52907;52908;52909;52910;52911;59121;59122;59123;59124;59125;59126;64788;64789;65208;65209;88332;88333;88334;88335;88336;107250;107251;107252;107253;107254;107255;107256;107257;110743;110744;113687;113688;113689;113690;113691;113692	827;830;16716;33519;49394;51931;52908;59123;64789;65209;88336;107254;110743;113692	310	244
F2Z2C8;Q9BVH7	F2Z2C8;Q9BVH7	1;1	1;1	1;1	Alpha-N-acetylgalactosaminide alpha-2,6-sialyltransferase 5	ST6GALNAC5	Isoform of Q9BVH7, Alpha-N-acetylgalactosaminide alpha-2,6-sialyltransferase 5;Alpha-N-acetylgalactosaminide alpha-2,6-sialyltransferase 5	non matrisome	non matrisome	0	0	0	0	0	0	0		0	0	0	0	1	0	0	0	1	+			346	5343	TRUE	5709	67134	71556	71556	153	209
J3KNQ4;Q9NVD7;E9PS97;A0A087WZB5;Q9NVD7-2;Q9HBI1-3;Q9HBI1;Q9HBI1-2	J3KNQ4;Q9NVD7;E9PS97	5;5;3;2;2;2;2;2	5;5;3;2;2;2;2;2	5;5;3;2;2;2;2;2	Alpha-parvin	PARVA	Isoform of Q9NVD7, Alpha-parvin;Alpha-parvin;Isoform of Q9NVD7, Alpha-parvin (Fragment)	non matrisome	non matrisome	65307000	0	0	0	37593000	0	27714000		0	1	0	6	0	2	2	6	17				449	1162;1414;4947;8136;8204	True;True;True;True;True	1233;1494;5261;8715;8790	15360;15361;17738;17739;17740;17741;17742;17743;17744;62556;62557;62558;62559;99784;100469;100470;100471;100472	16460;16461;18975;18976;18977;18978;18979;18980;18981;66739;66740;66741;66742;106272;106969;106970;106971;106972	16460;18977;66740;106272;106969
P40222	P40222	2	2	2	Alpha-taxilin	TXLNA	Alpha-taxilin	non matrisome	non matrisome	1405200	0	0	0	1405200	0	0		0	0	0	2	0	0	0	0	2				857	2395;7069	True;True	2532;7574	28804;86856;86857	30778;92495;92496	30778;92495
P27338-2;P27338	P27338-2;P27338	11;11	11;11	10;10	Amine oxidase [flavin-containing] B	MAOB	Isoform of P27338, Isoform 2 of Amine oxidase [flavin-containing] B;Amine oxidase [flavin-containing] B	non matrisome	non matrisome	207870000	51745000	38549000	0	23876000	37548000	56152000		4	7	0	5	3	9	1	19	48				801	2052;2133;2655;3829;3875;3952;3953;4479;4707;8256;8871	True;True;True;True;True;True;True;True;True;True;True	2173;2255;2820;4075;4124;4205;4206;4762;4997;8846;9486	25361;25966;25967;31771;31772;31773;31774;31775;31776;31777;31778;31779;31780;31781;31782;31783;31784;50082;50654;50655;50656;50657;51543;51544;51545;57135;57136;57137;57138;57139;57140;57141;57142;57143;57144;59401;59402;59403;59404;59405;59406;59407;101063;101064;101065;101066;101067;108608;108609;108610	27181;27834;27835;33903;33904;33905;33906;33907;33908;33909;33910;33911;33912;33913;33914;33915;33916;53644;54243;54244;54245;54246;55188;55189;55190;61066;61067;61068;61069;61070;61071;61072;61073;61074;61075;63441;63442;63443;63444;63445;63446;63447;107598;107599;107600;107601;107602;115565;115566;115567	27181;27835;33906;53644;54243;55188;55189;61072;63444;107599;115566
A0A087WZZ4;A0A0A0MQS8;Q02094	A0A087WZZ4;A0A0A0MQS8;Q02094	1;1;1	1;1;1	1;1;1	Ammonium transporter Rh type A	RHAG	Isoform of Q02094, Ammonium transporter Rh type A;Isoform of Q02094, Ammonium transporter Rh type A;Ammonium transporter Rh type A	non matrisome	non matrisome	14594000	0	0	0	0	14594000	0		0	0	0	0	0	2	0	0	2				47	2513	TRUE	2662	30104;30105	32163;32164	32164
Q9UJX6-2;Q9UJX6	Q9UJX6-2;Q9UJX6	1;1	1;1	1;1	Anaphase-promoting complex subunit 2	ANAPC2	Isoform of Q9UJX6, Isoform 2 of Anaphase-promoting complex subunit 2;Anaphase-promoting complex subunit 2	non matrisome	non matrisome	0	0	0	0	0	0	0		0	0	1	0	0	0	0	0	1				1251	4560	TRUE	4845	57882	61855	61855
P03950	P03950	5	5	5	Angiogenin	ANG	Angiogenin	non matrisome	non matrisome	98260000	0	37628000	0	0	40796000	19836000		0	8	1	1	7	9	0	2	28				623	1238;1394;5726;7071;8860	True;True;True;True;True	1310;1474;6157;7576;9474	15958;15959;15960;17557;17558;17559;17560;17561;17562;17563;72009;72010;72011;72012;72013;72014;72015;72016;86859;86860;86861;86862;86863;86864;86865;86866;86867;86868;108558	17105;17106;17107;18789;18790;18791;18792;18793;18794;18795;76725;76726;76727;76728;76729;76730;76731;76732;92498;92499;92500;92501;92502;92503;92504;92505;92506;92507;115511	17107;18790;76731;92504;115511
O95841	O95841	3	1	1	Angiopoietin-related protein 1	ANGPTL1	Angiopoietin-related protein 1	Matrisome-associated	Secreted Factors	0	0	0	0	0	0	0		0	0	1	0	1	0	0	0	2	+			565	4709;8437;8438	True;False;False	4999;9035;9036	59432;59433;103120;103121;103122;103123;103124;103125;103126	63472;63473;109811;109812;109813;109814;109815;109816;109817	63473;109811;109814	219	135
Q9UKU9;Q9UKU9-2;K7EKF6;Q8NI99	Q9UKU9	24;11;2;2	24;11;2;2	22;11;2;2	Angiopoietin-related protein 2	ANGPTL2	Angiopoietin-related protein 2	Matrisome-associated	Secreted Factors	3930170000	215690000	1027300000	693540000	666490000	818610000	508540000		6	64	39	52	46	61	16	46	330				1253	1110;1492;2140;3459;4396;4468;4776;4777;4801;5961;6058;6084;6123;6350;6441;6525;7055;7907;7908;8265;8410;8437;8438;8813	True;True;True;True;True;True;True;True;True;True;True;True;True;True;True;True;True;True;True;True;True;True;True;True	1179;1578;2262;3678;4674;4751;5068;5069;5070;5071;5100;6401;6510;6537;6583;6822;6920;7008;7560;8478;8479;8855;9004;9035;9036;9427	14598;14599;14600;14601;14602;14603;14604;14605;14606;14607;14608;14609;14610;14611;14612;14613;14614;14615;14616;14617;14618;14619;14620;14621;18681;26074;45341;45342;45343;45344;45345;45346;45347;45348;45349;45350;45351;45352;45353;45354;45355;45356;45357;45358;56291;56292;56293;56294;56295;56296;56297;56298;56299;56300;56301;56302;56303;56304;56305;56306;56307;56308;56309;56310;56311;56312;563…	15628;15629;15630;15631;15632;15633;15634;15635;15636;15637;15638;15639;15640;15641;15642;15643;15644;15645;15646;15647;15648;15649;15650;15651;15652;15653;20015;27948;48559;48560;48561;48562;48563;48564;48565;48566;48567;48568;48569;48570;48571;48572;48573;48574;48575;48576;60176;60177;60178;60179;60180;60181;60182;60183;60184;60185;60186;60187;60188;60189;60190;60191;60192;60193;60194;60195;601…	15633;20015;27948;48562;60178;61001;64457;64499;64816;79405;80434;80761;81496;84651;85635;86538;92392;103281;103291;107753;109509;109811;109814;114920	219;732	139;369
M0R2X8;Q9BY76-2;Q9BY76;M0R0N8;M0QZ51;M0R3A2;M0R369	M0R2X8;Q9BY76-2;Q9BY76;M0R0N8;M0QZ51;M0R3A2;M0R369	3;3;3;2;2;2;2	3;3;3;2;2;2;2	3;3;3;2;2;2;2	Angiopoietin-related protein 4	ANGPTL4	Isoform of Q9BY76, Angiopoietin-related protein 4 (Fragment);Isoform of Q9BY76, Isoform 2 of Angiopoietin-related protein 4;Angiopoietin-related protein 4;Isoform of Q9BY76, Angiopoietin-related protein 4 (Fragment);Isoform of Q9BY76, Angiopoietin-related	Matrisome-associated	Secreted Factors	152970000	0	63804000	0	59901000	29265000	0		0	9	1	5	7	3	1	1	27				489	7029;7030;7850	True;True;True	7533;7534;8419	86473;86474;86475;86476;86477;86478;86479;86480;86481;86482;86483;96415;96416;96417;96418;96419;96420;96421;96422;96423;96424;96425;96426;96427	92101;92102;92103;92104;92105;92106;92107;92108;92109;92110;92111;92112;92113;92114;102713;102714;102715;102716;102717;102718;102719;102720;102721;102722;102723;102724;102725	92112;92114;102725
P04083;Q5T3N1;Q5T3N0	P04083;Q5T3N1	10;5;3	10;5;3	10;5;3	Annexin A1;Annexin	ANXA1	Annexin A1;Isoform of P04083, Annexin (Fragment)	Matrisome-associated	ECM-affiliated Proteins	63086000	0	20395000	0	11786000	15054000	15851000		0	10	1	5	4	3	4	5	32				630	548;3074;3323;3359;5430;5745;5861;6729;7554;8105	True;True;True;True;True;True;True;True;True;True	579;3269;3536;3573;5829;6177;6296;7223;8104;8683	5959;5960;38528;43618;43619;44090;68235;72247;72248;72249;72250;72251;72252;72253;72254;72255;72256;72257;73708;83397;83398;83399;83400;83401;83402;92980;92981;92982;92983;92984;99307;99308	6260;6261;41217;46688;46689;47189;72738;76974;76975;76976;76977;76978;76979;76980;76981;76982;76983;76984;78529;88821;88822;88823;88824;88825;88826;99051;99052;99053;99054;99055;105766;105767	6260;41217;46689;47189;72738;76975;78529;88821;99053;105767
P50995-2;P50995;H0Y6E1	P50995-2;P50995	3;3;1	3;3;1	3;3;1	Annexin A11	ANXA11	Isoform of P50995, Isoform 2 of Annexin A11;Annexin A11	Matrisome-associated	ECM-affiliated Proteins	2922800	0	0	0	0	0	2922800		0	0	0	1	2	1	0	1	5				898	1189;2901;6751	True;True;True	1260;3090;7245	15558;35841;83533;83534;83535	16665;38304;88961;88962;88963	16665;38304;88962
P07355;P07355-2;H0YN42;H0YMD0;H0YMU9;A6NMY6;H0YM50;H0YKS4;H0YMM1;H0YNP5;H0YN28;H0YL33;H0YKZ7;H0YLV6;H0YMT9;H0YKX9;H0YNA0;H0YKV8;H0YKL9;H0YMW4;H0YMD9;H0YNB8;H0YN52;H0YKN4;H0YLE2	P07355;P07355-2;H0YN42;H0YMD0;H0YMU9;A6NMY6;H0YM50;H0YKS4	21;20;15;14;14;14;13;11;9;9;8;8;7;7;7;7;6;6;6;6;5;4;4;4;2	21;20;15;14;14;14;13;11;9;9;8;8;7;7;7;7;6;6;6;6;5;4;4;4;2	21;20;15;14;14;14;13;11;9;9;8;8;7;7;7;7;6;6;6;6;5;4;4;4;2	Annexin A2;Annexin;Putative annexin A2-like protein	ANXA2;ANXA2P2	Annexin A2;Isoform of P07355, Isoform 2 of Annexin A2;Isoform of P07355, Annexin (Fragment);Isoform of P07355, Annexin (Fragment);Isoform of P07355, Annexin;Putative annexin A2-like protein;Isoform of P07355, Annexin (Fragment);Isoform of P07355, Annexin (	Matrisome-associated	ECM-affiliated Proteins	1948600000	312390000	326650000	182790000	271080000	478570000	377120000		16	33	9	34	23	50	21	41	227				668	176;484;868;1181;1385;1386;2782;3073;3360;5025;5895;5896;6032;6310;6754;6965;7135;7198;7544;7555;8587	True;True;True;True;True;True;True;True;True;True;True;True;True;True;True;True;True;True;True;True;True	188;506;914;1252;1464;1465;2955;3268;3574;5339;6331;6332;6482;6782;7248;7468;7645;7713;7714;8093;8105;9192	1701;1702;5218;5219;5220;5221;5222;5223;9701;9702;9703;9704;9705;9706;9707;9708;9709;9710;9711;9712;9713;15517;17455;17456;17457;17458;17459;17460;17461;17462;17463;17464;17465;17466;17467;17468;17469;17470;17471;17472;17473;17474;17475;17476;17477;17478;32918;38513;38514;38515;38516;38517;38518;38519;38520;38521;38522;38523;38524;38525;38526;38527;44091;44092;44093;44094;44095;44096;44097;44098;…	1787;1788;5501;5502;5503;5504;5505;5506;10225;10226;10227;10228;10229;10230;10231;10232;10233;10234;10235;10236;10237;10238;16623;18674;18675;18676;18677;18678;18679;18680;18681;18682;18683;18684;18685;18686;18687;18688;18689;18690;18691;18692;18693;18694;18695;18696;18697;18698;35123;41202;41203;41204;41205;41206;41207;41208;41209;41210;41211;41212;41213;41214;41215;41216;47190;47191;47192;47193…	1788;5505;10238;16623;18674;18693;35123;41203;47214;67788;78893;78908;80111;84093;88975;91310;93562;94568;98922;99056;111926
P08758;D6RBL5;D6RBE9;E9PHT9	P08758;D6RBL5;D6RBE9	8;6;5;3	8;6;5;3	8;6;5;3	Annexin A5;Annexin	ANXA5	Annexin A5;Isoform of P08758, Annexin;Isoform of P08758, Annexin	Matrisome-associated	ECM-affiliated Proteins	154651000	24366000	38984000	0	32714000	32129000	26458000		2	12	3	9	10	8	2	10	56				684	477;1444;2474;2703;3075;5471;6727;8180	True;True;True;True;True;True;True;True	499;1525;2622;2874;3270;5880;7221;8760	5143;5144;5145;5146;5147;5148;17918;17919;29709;29710;29711;29712;29713;29714;32144;32145;38529;38530;68754;68755;68756;68757;68758;83379;83380;83381;83382;83383;83384;83385;83386;83387;83388;83389;83390;83391;83392;83393;83394;83395;100063;100064;100065;100066;100067;100068;100069;100070;100071;100072;100073;100074;100075;100076;100077;100078;100079;100080	5425;5426;5427;5428;5429;5430;19162;19163;31755;31756;31757;31758;31759;31760;34296;34297;41218;41219;73311;73312;73313;73314;73315;88803;88804;88805;88806;88807;88808;88809;88810;88811;88812;88813;88814;88815;88816;88817;88818;88819;106552;106553;106554;106555;106556;106557;106558;106559;106560;106561;106562;106563;106564;106565;106566;106567;106568;106569	5430;19163;31755;34296;41219;73314;88804;106554
P08133-2;P08133;E7EMC6;E5RK69;E5RJF5;E5RK63;E5RI05;E5RFF0;H0YC77;E5RIU8;E5RJR0	P08133-2;P08133	15;15;7;7;3;3;2;2;1;1;1	15;15;7;7;3;3;2;2;1;1;1	15;15;7;7;3;3;2;2;1;1;1	Annexin A6	ANXA6	Isoform of P08133, Isoform 2 of Annexin A6;Annexin A6	Matrisome-associated	ECM-affiliated Proteins	357389000	67290000	54123000	0	54233000	83320000	98423000		6	10	5	12	21	17	6	17	94				675	468;1164;1178;1425;1756;2522;2835;4796;5133;5837;6734;6737;6897;6919;7125	True;True;True;True;True;True;True;True;True;True;True;True;True;True;True	490;1235;1249;1506;1862;2674;3015;5094;5454;6272;7228;7231;7397;7420;7635	5022;5023;5024;5025;5026;5027;5028;5029;5030;5031;5032;5033;5034;5035;5036;5037;5038;5039;5040;15363;15508;15509;15510;17775;17776;17777;17778;22051;22052;22053;22054;22055;22056;22057;22058;22059;22060;22061;22062;22063;22064;22065;22066;22067;22068;22069;22070;22071;22072;22073;22074;22075;22076;22077;22078;22079;22080;22081;22082;30175;30176;30177;30178;30179;34202;34203;34204;34205;60703;6452…	5294;5295;5296;5297;5298;5299;5300;5301;5302;5303;5304;5305;5306;5307;5308;5309;5310;5311;5312;16463;16614;16615;16616;19014;19015;19016;19017;23633;23634;23635;23636;23637;23638;23639;23640;23641;23642;23643;23644;23645;23646;23647;23648;23649;23650;23651;23652;23653;23654;23655;23656;23657;23658;23659;23660;23661;23662;23663;23664;32235;32236;32237;32238;32239;36508;36509;36510;36511;64793;6878…	5303;16463;16616;19017;23633;32239;36511;64793;68793;78269;88845;88865;90628;90852;93380
P20073-2;P20073	P20073-2;P20073	6;6	6;6	6;6	Annexin A7	ANXA7	Isoform of P20073, Isoform 2 of Annexin A7;Annexin A7	Matrisome-associated	ECM-affiliated Proteins	58276000	0	15309000	0	22044000	0	20923000		2	6	0	8	3	6	1	8	34				762	1454;1894;2704;2902;6728;8138	True;True;True;True;True;True	1535;2004;2875;3091;7222;8717	18034;18035;18036;23114;32146;32147;32148;32149;35842;35843;35844;35845;35846;35847;35848;35849;35850;35851;35852;35853;35854;35855;35856;35857;35858;83396;99796;99797;99798;99799;99800;99801;99802	19278;19279;19280;24748;34298;34299;34300;34301;38305;38306;38307;38308;38309;38310;38311;38312;38313;38314;38315;38316;38317;38318;38319;38320;38321;38322;38323;88820;106284;106285;106286;106287;106288;106289;106290	19280;24748;34300;38311;88820;106287
Q6P452;P09525-2;P09525	Q6P452;P09525-2;P09525	3;3;3	3;3;3	3;3;3	Annexin;Annexin A4	ANXA4	Isoform of P09525, Annexin;Isoform of P09525, Isoform 2 of Annexin A4;Annexin A4	Matrisome-associated	ECM-affiliated Proteins	22312000	0	0	0	0	22312000	0		0	2	0	0	2	4	0	2	10				688	200;3072;6752	True;True;True	212;3267;7246	1814;38512;83536;83537;83538;83539;83540;83541;83542;83543	1900;41201;88964;88965;88966;88967;88968;88969;88970;88971;88972	1900;41201;88971
P46013-2;P46013	P46013-2;P46013	1;1	1;1	1;1	Antigen KI-67	MKI67	Isoform of P46013, Isoform Short of Proliferation marker protein Ki-67;Proliferation marker protein Ki-67	non matrisome	non matrisome	1326300	0	0	0	1326300	0	0		0	0	0	1	0	0	0	0	1				867	173	TRUE	185	1697	1783	1783
P03973	P03973	9	9	9	Antileukoproteinase	SLPI	Antileukoproteinase	Matrisome-associated	ECM Regulators	3519180000	0	909580000	1253700000	363780000	667380000	324740000		2	29	24	21	27	28	11	18	160				624	892;893;1004;1005;1054;4249;5780;6332;6674	True;True;True;True;True;True;True;True;True	938;939;940;1061;1062;1115;1116;4521;6214;6804;7166	9976;9977;9978;9979;9980;9981;9982;9983;9984;9985;9986;12586;12587;12588;12589;12590;12591;12592;12593;12594;12595;12596;12597;12598;12599;12600;12601;12602;12603;12604;12605;12606;12607;12608;12609;12610;12611;12612;12613;12614;12615;12616;12617;12618;12619;12620;12621;12622;12623;12624;12625;12626;12627;12628;12629;12630;12631;12632;12633;12634;12635;12636;12637;12638;12639;12640;12641;12642;12…	10524;10525;10526;10527;10528;10529;10530;10531;10532;10533;10534;10535;10536;10537;10538;13311;13312;13313;13314;13315;13316;13317;13318;13319;13320;13321;13322;13323;13324;13325;13326;13327;13328;13329;13330;13331;13332;13333;13334;13335;13336;13337;13338;13339;13340;13341;13342;13343;13344;13345;13346;13347;13348;13349;13350;13351;13352;13353;13354;13355;13356;13357;13358;13359;13360;13361;133…	10525;10531;13327;13356;14421;58583;77382;84370;88401	290;291	98;107
P01008;Q8TCE1;CON__P41361	P01008	11;5;3	11;5;3	11;5;3	Antithrombin-III	SERPINC1	Antithrombin-III	Matrisome-associated	ECM Regulators	1398640000	189380000	281600000	231300000	166490000	239480000	290390000		14	30	17	22	27	30	23	36	199				581	555;2175;2293;2360;2387;2567;2762;4852;4934;7618;7755	True;True;True;True;True;True;True;True;True;True;True	586;2298;2299;2425;2426;2495;2524;2721;2935;5153;5246;8169;8317	6015;6016;6017;6018;6019;26499;26500;26501;26502;26503;26504;27552;27553;27554;27555;27556;27557;27558;27559;27560;27561;27562;27563;27564;27565;27566;27567;27568;27569;27570;27571;27572;27573;27574;27575;27576;27577;27578;27579;27580;27581;27582;27583;27584;27585;27586;27587;27588;27589;27590;27591;27592;27593;27594;27595;27596;27597;27598;27599;27600;27601;27602;27603;27604;27605;27606;27607;27…	6321;6322;6323;6324;6325;28389;28390;28391;28392;28393;28394;29473;29474;29475;29476;29477;29478;29479;29480;29481;29482;29483;29484;29485;29486;29487;29488;29489;29490;29491;29492;29493;29494;29495;29496;29497;29498;29499;29500;29501;29502;29503;29504;29505;29506;29507;29508;29509;29510;29511;29512;29513;29514;29515;29516;29517;29518;29519;29520;29521;29522;29523;29524;29525;29526;29527;29528;29…	6324;28389;29528;30261;30615;32804;35010;65383;66583;99765;101620	225;226	370;455
O43747;O43747-2;B3KNW1	O43747;O43747-2;B3KNW1	2;2;1	2;2;1	2;2;1	AP-1 complex subunit gamma-1	AP1G1	AP-1 complex subunit gamma-1;Isoform of O43747, Isoform 2 of AP-1 complex subunit gamma-1;Isoform of O43747, AP-1 complex subunit gamma-1	non matrisome	non matrisome	1456900	0	0	0	1456900	0	0		0	0	0	2	0	0	0	0	2				524	3722;8090	True;True	3957;8668	48559;99185	52016;105638	52016;105638
C9J1E7;A0A087WU93;A0A087WZQ6;P63010-3;Q10567-4;P63010;Q10567-3;Q10567-2;Q10567;P63010-2;K7EN71;K7ERB2;A0A087WYD1;A0A087X253	C9J1E7;A0A087WU93;A0A087WZQ6;P63010-3;Q10567-4;P63010;Q10567-3;Q10567-2;Q10567;P63010-2;K7EN71;K7ERB2;A0A087WYD1;A0A087X253	2;2;2;2;2;2;2;2;2;2;1;1;1;1	2;2;2;2;2;2;2;2;2;2;1;1;1;1	2;2;2;2;2;2;2;2;2;2;1;1;1;1	AP-2 complex subunit beta;AP-1 complex subunit beta-1	AP1B1;AP2B1	Isoform of Q10567, AP-1 complex subunit beta-1 (Fragment);Isoform of P63010, AP-2 complex subunit beta (Fragment);Isoform of P63010, AP-2 complex subunit beta (Fragment);Isoform of P63010, Isoform 3 of AP-2 complex subunit beta;Isoform of Q10567, Isoform 4	non matrisome	non matrisome	3411600	0	0	0	3411600	0	0		0	1	0	1	0	0	0	0	2				27	4121;5012	True;True	4386;5326	53466;63299;63300	57218;67533;67534	57218;67534
P02647;F8W696	P02647;F8W696	12;10	12;10	12;10	Apolipoprotein A-I;Proapolipoprotein A-I;Truncated apolipoprotein A-I	APOA1	Apolipoprotein A-I;Isoform of P02647, Apolipoprotein A-I	non matrisome	non matrisome	463320000	69650000	73686000	0	77854000	107550000	134580000		5	10	2	14	16	16	6	24	93				606	729;1417;1591;4674;4961;5038;5746;6100;7420;7896;8295;8341	True;True;True;True;True;True;True;True;True;True;True;True	767;1497;1682;4964;5275;5354;6178;6556;7953;8466;8885;8932	8117;17749;17750;17751;17752;17753;17754;17755;17756;19978;19979;19980;19981;19982;19983;19984;19985;59099;59100;59101;59102;59103;59104;59105;59106;59107;59108;59109;59110;59111;59112;59113;59114;62630;62631;62632;62633;63661;72258;72259;72260;72261;72262;72263;72264;72265;72266;72267;76014;76015;76016;76017;76018;76019;76020;76021;91406;91407;91408;91409;91410;91411;91412;91413;91414;96872;9687…	8563;18986;18987;18988;18989;18990;18991;18992;18993;21454;21455;21456;21457;21458;21459;21460;21461;63132;63133;63134;63135;63136;63137;63138;63139;63140;63141;63142;63143;63144;63145;63146;63147;66817;66818;66819;66820;67903;76985;76986;76987;76988;76989;76990;76991;76992;76993;76994;80950;80951;80952;80953;80954;80955;80956;80957;97402;97403;97404;97405;97406;97407;97408;97409;97410;103200;103…	8563;18986;21458;63139;66818;67903;76994;80953;97409;103204;108231;108793
V9GYG9;V9GYM3;P02652;V9GYE3;V9GYC1;V9GYS1	V9GYG9;V9GYM3;P02652;V9GYE3;V9GYC1;V9GYS1	2;2;2;1;1;1	2;2;2;1;1;1	2;2;2;1;1;1	Apolipoprotein A-II;Proapolipoprotein A-II;Truncated apolipoprotein A-II	APOA2	Isoform of P02652, Apolipoprotein A-II (Fragment);Isoform of P02652, Apolipoprotein A-II;Apolipoprotein A-II;Isoform of P02652, Apolipoprotein A-II;Isoform of P02652, Apolipoprotein A-II (Fragment);Isoform of P02652, Apolipoprotein A-II	non matrisome	non matrisome	47317000	0	0	0	0	0	47317000		0	1	0	1	4	3	2	5	16				608	2138;2178	True;True	2260;2302	26071;26072;26566;26567;26568;26569;26570;26571;26572;26573;26574;26575;26576;26577;26578;26579	27945;27946;28457;28458;28459;28460;28461;28462;28463;28464;28465;28466;28467;28468;28469;28470	27946;28460
P06727;CON__Q32PJ2	P06727	18;1	18;1	18;1	Apolipoprotein A-IV	APOA4	Apolipoprotein A-IV	non matrisome	non matrisome	1314673000	148070000	103380000	58933000	371570000	120670000	512050000		8	14	2	44	16	10	14	33	141				659	533;650;3253;4058;4319;4471;4565;4744;4821;5099;5178;6186;6529;6585;6884;6885;6887;8235	True;True;True;True;True;True;True;True;True;True;True;True;True;True;True;True;True;True	558;686;3460;4318;4592;4754;4850;5034;5121;5419;5499;6647;7012;7071;7384;7385;7387;8824	5691;5692;5693;5694;7059;7060;42533;42534;52712;52713;52714;52715;52716;52717;52718;52719;55231;55232;55233;55234;55235;55236;55237;55238;55239;55240;55241;55242;55243;55244;55245;57111;57112;57113;57114;57115;57116;57117;57931;57932;57933;57934;57935;57936;57937;57938;57939;57940;57941;57942;57943;57944;57945;57946;57947;57948;57949;57950;57951;57952;57953;57954;57955;57956;57957;57958;59825;598…	5989;5990;5991;5992;7436;7437;45526;45527;56428;56429;56430;56431;56432;56433;56434;56435;56436;56437;56438;59068;59069;59070;59071;59072;59073;59074;59075;59076;59077;59078;59079;59080;59081;59082;61040;61041;61042;61043;61044;61045;61046;61047;61905;61906;61907;61908;61909;61910;61911;61912;61913;61914;61915;61916;61917;61918;61919;61920;61921;61922;61923;61924;61925;61926;61927;61928;61929;619…	5989;7436;45526;56437;59070;61040;61911;63892;65096;68428;69277;82217;86605;87219;90526;90528;90540;107285
K7ERI9;P02654;K7EKP1;K7EJI9;K7ELM9;K7EPF9	K7ERI9;P02654	3;3;1;1;1;1	3;3;1;1;1;1	3;3;1;1;1;1	Apolipoprotein C-I;Truncated apolipoprotein C-I	APOC1	Isoform of P02654, Apolipoprotein C-I (Fragment);Apolipoprotein C-I	non matrisome	non matrisome	0	0	0	0	0	0	0		0	1	0	1	4	1	0	1	8				480	1880;2317;5371	True;True;True	1990;2451;5751	23020;23021;23022;23023;27816;67486;67487;67488	24644;24645;24646;24647;29740;71927;71928;71929	24647;29740;71928	181	64
K7EMC3;K7ER74;P55056	K7EMC3;K7ER74;P55056	1;1;1	1;1;1	1;1;1	Apolipoprotein C-IV	APOC4;APOC4-APOC2	Isoform of P55056, Apolipoprotein C-IV;Isoform of P02655, Protein APOC4-APOC2;Apolipoprotein C-IV	non matrisome	non matrisome	0	0	0	0	0	0	0		0	0	0	0	2	0	0	0	2				476	2066	TRUE	2187	25453;25454	27274;27275	27274
C9JF17;P05090;C9JX71	C9JF17;P05090;C9JX71	3;3;2	3;3;2	3;3;2	Apolipoprotein D	APOD	Isoform of P05090, Apolipoprotein D (Fragment);Apolipoprotein D;Isoform of P05090, Apolipoprotein D (Fragment)	non matrisome	non matrisome	10171000	0	10171000	0	0	0	0		0	5	0	1	1	0	1	2	10				213	4000;5527;8156	True;True;True	4257;5939;8735	52061;69515;69516;69517;69518;69519;69520;69521;69522;99920	55748;74124;74125;74126;74127;74128;74129;74130;74131;106408	55748;74128;106408
P02649;H0Y7L5;E9PEV4;E7ERP7;CON__Q03247	P02649;H0Y7L5;E9PEV4;E7ERP7	12;8;7;7;2	12;8;7;7;2	12;8;7;7;2	Apolipoprotein E	APOE	Apolipoprotein E;Isoform of P02649, Apolipoprotein E (Fragment);Isoform of P02649, Apolipoprotein E (Fragment);Isoform of P02649, Apolipoprotein E (Fragment)	non matrisome	non matrisome	575377000	0	166650000	132270000	67193000	97334000	111930000		1	19	8	8	21	12	4	9	82				607	76;486;2183;2874;4350;4443;4528;4567;4879;6739;7183;7897	True;True;True;True;True;True;True;True;True;True;True;True	80;508;2307;3060;3061;4625;4723;4813;4852;5183;7233;7695;7696;8467	727;728;729;730;731;732;733;734;735;736;737;738;739;740;741;742;743;744;745;746;747;748;749;750;5240;5241;26597;35504;35505;35506;35507;35508;35509;35510;55608;55609;55610;55611;55612;55613;55614;55615;56667;56668;56669;56670;56671;56672;56673;56674;56675;56676;56677;56678;56679;56680;56681;57605;57606;57607;57608;57609;57961;57962;57963;57964;57965;57966;57967;57968;57969;57970;57971;57972;57973…	761;762;763;764;765;766;767;768;769;770;771;772;773;774;775;776;777;778;779;780;781;782;783;784;5523;5524;28488;37957;37958;37959;37960;37961;37962;37963;59454;59455;59456;59457;59458;59459;59460;59461;60565;60566;60567;60568;60569;60570;60571;60572;60573;60574;60575;60576;60577;60578;60579;61559;61560;61561;61562;61563;61935;61936;61937;61938;61939;61940;61941;61942;61943;61944;61945;61946;61947…	779;5524;28488;37961;59455;60568;61559;61941;65823;88879;94305;103205	253;254;255	126;143;290
G3V1C3;Q9BZZ5-3;Q9BZZ5-2;Q9BZZ5;E9PQK6;H0YER7;Q9BZZ5-1;Q9BZZ5-5;Q9BZZ5-6	G3V1C3;Q9BZZ5-3;Q9BZZ5-2;Q9BZZ5;E9PQK6;H0YER7;Q9BZZ5-1;Q9BZZ5-5;Q9BZZ5-6	2;2;2;2;1;1;1;1;1	2;2;2;2;1;1;1;1;1	2;2;2;2;1;1;1;1;1	Apoptosis inhibitor 5	API5	Isoform of Q9BZZ5, Apoptosis inhibitor 5;Isoform of Q9BZZ5, Isoform 3 of Apoptosis inhibitor 5;Isoform of Q9BZZ5, Isoform 2 of Apoptosis inhibitor 5;Apoptosis inhibitor 5;Isoform of Q9BZZ5, Apoptosis inhibitor 5;Isoform of Q9BZZ5, Apoptosis inhibitor 5 (Fr	non matrisome	non matrisome	6593600	0	0	0	6593600	0	0		0	0	0	2	0	0	0	0	2				381	2267;5734	True;True	2397;6166	27417;72163	29338;76887	29338;76887
K7N7A8;P29972;P29972-4;P29972-2;P29972-3	K7N7A8;P29972;P29972-4;P29972-2;P29972-3	2;2;1;1;1	2;2;1;1;1	2;2;1;1;1	Aquaporin-1	AQP1	Uncharacterized protein (Fragment);Aquaporin-1;Isoform of P29972, Isoform 4 of Aquaporin-1;Isoform of P29972, Isoform 2 of Aquaporin-1;Isoform of P29972, Isoform 3 of Aquaporin-1	non matrisome	non matrisome	28245000	0	0	0	0	28245000	0		0	0	0	0	1	3	0	1	5				482	7065;8804	True;True	7570;9418	86829;107835;107836;107837;107838;107839	92468;114739;114740;114741;114742;114743	92468;114741
P05089;P05089-2;P05089-3	P05089;P05089-2;P05089-3	2;2;1	2;2;1	2;2;1	Arginase-1	ARG1	Arginase-1;Isoform of P05089, Isoform 2 of Arginase-1;Isoform of P05089, Isoform 3 of Arginase-1	non matrisome	non matrisome	27627400	13315000	6014900	0	0	3541800	4755700		3	3	0	2	0	3	2	2	15				642	1408;8206	True;True	1488;8792	17659;17660;17661;17662;17663;17664;17665;17666;100474;100475;100476;100477;100478	18893;18894;18895;18896;18897;18898;18899;18900;18901;106974;106975;106976;106977;106978;106979	18898;106977
P00505;P00505-2	P00505;P00505-2	10;9	10;9	10;9	Aspartate aminotransferase, mitochondrial	GOT2	Aspartate aminotransferase, mitochondrial;Isoform of P00505, Isoform 2 of Aspartate aminotransferase, mitochondrial	non matrisome	non matrisome	162051000	0	38134000	78347000	45570000	0	0		0	10	5	17	0	0	0	0	32				574	1171;2323;2672;3627;3782;4106;5948;7247;7597;7953	True;True;True;True;True;True;True;True;True;True	1242;2457;2840;3862;4022;4368;6388;7769;8147;8525	15440;27935;27936;27937;27938;27939;27940;27941;31897;31898;31899;31900;31901;31902;31903;31904;47657;47658;47659;49388;49389;53308;53309;53310;74468;74469;74470;89504;89505;93351;97586;97587	16545;29863;29864;29865;29866;29867;29868;29869;34034;34035;34036;34037;34038;34039;34040;34041;51070;51071;51072;52912;52913;57058;57059;57060;79336;79337;79338;95316;95317;99468;103948;103949	16545;29868;34037;51072;52913;57058;79337;95316;99468;103948
Q9BXN1;Q5TBF2	Q9BXN1	12;4	12;4	12;4	Asporin	ASPN	Asporin	Core matrisome	Proteoglycans	3194840000	784450000	276900000	534830000	411440000	965690000	221530000		24	16	15	25	14	37	36	16	183				1207	1985;3091;3111;3998;4105;5236;5332;6964;8009;8478;8764;8881	True;True;True;True;True;True;True;True;True;True;True;True	2101;3286;3306;4255;4367;5559;5692;5693;7467;8582;9079;9374;9496;9497	24562;24563;24564;38850;38851;38852;38853;38854;38855;38856;38857;38858;38859;38860;39013;39014;39015;39016;39017;39018;39019;39020;39021;39022;39023;39024;39025;39026;52043;52044;52045;52046;52047;52048;52049;52050;52051;52052;52053;52054;52055;52056;52057;53293;53294;53295;53296;53297;53298;53299;53300;53301;53302;53303;53304;53305;53306;53307;65744;65745;65746;65747;65748;65749;65750;65751;657…	26320;26321;26322;26323;41578;41579;41580;41581;41582;41583;41584;41585;41586;41587;41588;41746;41747;41748;41749;41750;41751;41752;41753;41754;41755;41756;41757;41758;41759;55728;55729;55730;55731;55732;55733;55734;55735;55736;55737;55738;55739;55740;55741;55742;55743;55744;57043;57044;57045;57046;57047;57048;57049;57050;57051;57052;57053;57054;57055;57056;57057;70075;70076;70077;70078;70079;700…	26322;41586;41747;55742;57051;70093;71435;91287;104632;110641;114094;115645	716;717	106;359
Q5QNZ2;P24539	Q5QNZ2;P24539	1;1	1;1	1;1	ATP synthase F(0) complex subunit B1, mitochondrial	ATP5F1	Isoform of P24539, ATP synthase F(0) complex subunit B1, mitochondrial;ATP synthase F(0) complex subunit B1, mitochondrial	non matrisome	non matrisome	0	0	0	0	0	0	0		0	1	0	0	0	0	0	0	1				789	3620	TRUE	3855	47564	50975	50975
P00846	P00846	1	1	1	ATP synthase subunit a	MT-ATP6	ATP synthase subunit a	non matrisome	non matrisome	6046300	0	0	0	6046300	0	0		0	2	0	2	0	0	0	0	4				580	4649	TRUE	4938	58931;58932;58933;58934	62958;62959;62960;62961	62961
P25705;P25705-2;P25705-3;K7ERX7;K7EK77;K7ENJ4;K7EJP1;K7EQH4;K7ESA0	P25705;P25705-2;P25705-3;K7ERX7;K7EK77	14;13;12;7;7;6;5;4;2	14;13;12;7;7;6;5;4;2	14;13;12;7;7;6;5;4;2	ATP synthase subunit alpha, mitochondrial	ATP5A1	ATP synthase subunit alpha, mitochondrial;Isoform of P25705, Isoform 2 of ATP synthase subunit alpha, mitochondrial;Isoform of P25705, Isoform 3 of ATP synthase subunit alpha, mitochondrial;Isoform of P25705, ATP synthase subunit alpha, mitochondrial (Frag	non matrisome	non matrisome	420898000	46490000	90159000	42862000	206530000	18266000	16591000		2	23	6	27	3	3	0	7	71				795	785;2019;3020;3445;3905;4108;4456;6474;6553;6564;7403;7627;8173;8463	True;True;True;True;True;True;True;True;True;True;True;True;True;True	825;2139;3213;3664;4154;4370;4736;6953;7038;7049;7936;8178;8753;9064	8569;8570;8571;8572;8573;8574;8575;8576;8577;8578;8579;25145;37915;37916;45130;45131;45132;45133;45134;45135;45136;45137;45138;45139;45140;45141;45142;50820;50821;53319;53320;56805;56806;56807;80774;80775;80776;80777;80778;80779;81484;81485;81486;81487;81488;81489;81490;81606;81607;81608;91150;91151;91152;93741;93742;93743;93744;93745;93746;99991;99992;99993;99994;99995;99996;99997;99998;99999;10…	9027;9028;9029;9030;9031;9032;9033;9034;9035;9036;9037;26948;40584;40585;48337;48338;48339;48340;48341;48342;48343;48344;48345;48346;48347;48348;48349;54416;54417;57069;57070;60704;60705;60706;85989;85990;85991;85992;85993;85994;86759;86760;86761;86762;86763;86764;86765;86884;86885;86886;97114;97115;97116;99871;99872;99873;99874;99875;99876;106479;106480;106481;106482;106483;106484;106485;106486;…	9034;26948;40585;48346;54417;57069;60705;85991;86763;86885;97115;99873;106482;110380
P06576;H0YH81;F8W079;F8W0P7;H0YI37	P06576;H0YH81;F8W079	9;7;5;2;1	9;7;5;2;1	9;7;5;2;1	ATP synthase subunit beta, mitochondrial;ATP synthase subunit beta	ATP5B	ATP synthase subunit beta, mitochondrial;Isoform of P06576, ATP synthase subunit beta (Fragment);Isoform of P06576, ATP synthase subunit beta, mitochondrial (Fragment)	non matrisome	non matrisome	208450000	0	104200000	0	104250000	0	0		0	13	2	15	0	0	0	0	30				656	350;374;2510;2635;3962;3963;4001;5164;8464	True;True;True;True;True;True;True;True;True	368;392;2659;2798;4216;4217;4258;5485;9065	3409;3410;3908;3909;30061;30062;31615;31616;51587;51588;51589;51590;52062;64849;64850;64851;64852;64853;64854;64855;64856;103668;103669;103670;103671;103672;103673;103674;103675;103676	3592;3593;4128;4129;32119;32120;33743;33744;55233;55234;55235;55236;55749;69128;69129;69130;69131;69132;69133;69134;69135;69136;110386;110387;110388;110389;110390;110391;110392;110393;110394	3593;4129;32119;33744;55234;55236;55749;69134;110387
C9JJT5;C9JU26;G3V325;P56134-4;P56134-3;P56134-2;P56134	C9JJT5;C9JU26;G3V325;P56134-4;P56134-3;P56134-2;P56134	2;2;2;2;2;2;2	2;2;2;2;2;2;2	2;2;2;2;2;2;2	ATP synthase subunit f, mitochondrial	ATP5J2-PTCD1;ATP5J2	Isoform of G3V325, Protein ATP5J2-PTCD1;Isoform of P56134, ATP synthase subunit f, mitochondrial;Protein ATP5J2-PTCD1;Isoform of P56134, Isoform 4 of ATP synthase subunit f, mitochondrial;Isoform of P56134, Isoform 3 of ATP synthase subunit f, mitochondria	non matrisome	non matrisome	4906700	0	0	0	0	0	4906700		0	1	0	0	1	1	0	1	4				218	1285;4533	True;True	1361;4818	16456;16457;16458;57623	17624;17625;17626;61577	17626;61577
E9PN17;O75964	E9PN17;O75964	1;1	1;1	1;1	ATP synthase subunit g, mitochondrial	ATP5L	Isoform of O75964, ATP synthase subunit g, mitochondrial;ATP synthase subunit g, mitochondrial	non matrisome	non matrisome	3367600	0	0	0	3367600	0	0		0	1	0	1	0	0	0	0	2				340	4179	TRUE	4447	54100;54101	57884;57885	57884
P36542-2;P36542	P36542-2;P36542	3;3	3;3	3;3	ATP synthase subunit gamma, mitochondrial	ATP5C1	Isoform of P36542, Isoform Heart of ATP synthase subunit gamma, mitochondrial;ATP synthase subunit gamma, mitochondrial	non matrisome	non matrisome	2973000	0	0	0	2973000	0	0		0	0	0	4	0	0	0	0	4				848	2291;5093;7424	True;True;True	2423;5413;7957	27549;64092;64093;91437	29470;68337;68338;97433	29470;68337;97433
P48047;H7C068;H7C0C1	P48047	3;1;1	3;1;1	3;1;1	ATP synthase subunit O, mitochondrial	ATP5O	ATP synthase subunit O, mitochondrial	non matrisome	non matrisome	3416000	0	0	0	3416000	0	0		0	0	0	3	0	0	0	0	3				879	6766;7284;7749	True;True;True	7260;7809;8310	83612;89945;95252	89041;95800;101475	89041;95800;101475
H0YGW7;Q8NE71-2;Q8NE71	H0YGW7;Q8NE71-2;Q8NE71	1;1;1	1;1;1	1;1;1	ATP-binding cassette sub-family F member 1	ABCF1	Isoform of Q8NE71, ATP-binding cassette sub-family F member 1 (Fragment);Isoform of Q8NE71, Isoform 2 of ATP-binding cassette sub-family F member 1;ATP-binding cassette sub-family F member 1	non matrisome	non matrisome	6992500	0	0	0	6992500	0	0		0	0	0	1	0	0	0	0	1				410	7120	TRUE	7629	87639	93324	93324
P53396-2;P53396;P53396-3	P53396-2;P53396;P53396-3	5;5;4	5;5;4	5;5;4	ATP-citrate synthase	ACLY	Isoform of P53396, Isoform 2 of ATP-citrate synthase;ATP-citrate synthase;Isoform of P53396, Isoform 3 of ATP-citrate synthase	non matrisome	non matrisome	1170400	0	0	0	1170400	0	0		0	2	0	4	0	0	0	0	6				912	1992;3811;4771;5242;6800	True;True;True;True;True	2108;4053;5063;5565;7295	24599;49687;49688;60269;65851;83868	26358;53228;53229;64350;70188;89334	26358;53228;64350;70188;89334
Q01813-2;Q01813;Q5VSR5;V9GYV7;B1APP8;P17858;P17858-2	Q01813-2;Q01813;Q5VSR5	4;4;3;1;1;1;1	4;4;3;1;1;1;1	3;3;2;1;1;0;0	ATP-dependent 6-phosphofructokinase, platelet type	PFKP	Isoform of Q01813, Isoform 2 of ATP-dependent 6-phosphofructokinase, platelet type;ATP-dependent 6-phosphofructokinase, platelet type;Isoform of Q01813, ATP-dependent 6-phosphofructokinase, platelet type (Fragment)	non matrisome	non matrisome	9876400	0	0	0	0	0	9876400		0	2	0	2	3	3	0	3	13				1005	14;1468;3852;7365	True;True;True;True	15;1549;4099;7897	135;18327;18328;50377;50378;50379;50380;50381;50382;90662;90663;90664;90665	140;19604;19605;53945;53946;53947;53948;53949;53950;96553;96554;96555;96556	140;19604;53948;96555
P46063	P46063	1	1	1	ATP-dependent DNA helicase Q1	RECQL	ATP-dependent DNA helicase Q1	non matrisome	non matrisome	2298300	0	0	0	2298300	0	0		0	1	0	1	0	0	0	0	2				869	5935	TRUE	6374	74416;74417	79276;79277	79277
Q08211;Q08211-2	Q08211	16;4	16;4	16;4	ATP-dependent RNA helicase A	DHX9	ATP-dependent RNA helicase A	non matrisome	non matrisome	200519000	0	84574000	55467000	60478000	0	0		0	13	6	12	0	0	0	0	31				1026	19;54;382;1293;1919;2037;3023;3943;4521;4926;5482;6204;7668;7758;7923;8803	True;True;True;True;True;True;True;True;True;True;True;True;True;True;True;True	20;55;400;1370;2029;2157;3216;4195;4806;5236;5892;6667;8225;8320;8494;9417	176;467;3979;3980;3981;3982;16526;16527;23339;23340;25258;25259;37920;37921;37922;51313;57568;62316;62317;68820;68821;68822;68823;77452;94218;95429;95430;97198;97199;97200;107833;107834	182;480;4201;4202;4203;4204;17694;17695;24991;24992;27074;27075;40589;40590;40591;54921;61521;66492;66493;73377;73378;73379;73380;82513;100370;101657;101658;103538;103539;103540;114737;114738	182;480;4202;17694;24991;27074;40590;54921;61521;66493;73378;82513;100370;101657;103540;114738
F1T0B3;A0A087X2G1;Q92499-3;Q92499-2;Q92499	F1T0B3;A0A087X2G1;Q92499-3;Q92499-2;Q92499	2;2;2;2;2	2;2;2;2;2	2;2;2;2;2	ATP-dependent RNA helicase DDX1	DDX1	Isoform of Q92499, ATP-dependent RNA helicase DDX1;Isoform of Q92499, ATP-dependent RNA helicase DDX1;Isoform of Q92499, Isoform 3 of ATP-dependent RNA helicase DDX1;Isoform of Q92499, Isoform 2 of ATP-dependent RNA helicase DDX1;ATP-dependent RNA helicase	non matrisome	non matrisome	3329500	0	0	0	3329500	0	0		0	0	0	2	0	0	0	0	2				59	2532;4827	True;True	2684;5127	30290;61021	32354;65121	32354;65121
I3L352;I3L0H8;F6QDS0;H3BQK0;Q9UMR2-3;Q9NUU7-2;Q9UMR2-2;Q9UMR2-4;Q9NUU7;Q9UMR2	I3L352;I3L0H8;F6QDS0;H3BQK0;Q9UMR2-3;Q9NUU7-2;Q9UMR2-2;Q9UMR2-4;Q9NUU7;Q9UMR2	3;3;3;3;3;3;3;3;3;3	3;3;3;3;3;3;3;3;3;3	3;3;3;3;3;3;3;3;3;3	ATP-dependent RNA helicase DDX19B;ATP-dependent RNA helicase DDX19A	DDX19A;DDX19B	Isoform of Q9NUU7, ATP-dependent RNA helicase DDX19A (Fragment);Isoform of Q9NUU7, ATP-dependent RNA helicase DDX19A;Isoform of Q9UMR2, HCG2043426, isoform CRA_b;Isoform of Q9UMR2, ATP-dependent RNA helicase DDX19B;Isoform of Q9UMR2, Isoform 3 of ATP-depen	non matrisome	non matrisome	5808000	0	0	0	5808000	0	0		0	0	0	3	0	0	0	0	3				359	3734;7230;8199	True;True;True	3969;7751;8784	48709;89334;100365	52180;95138;106863	52180;95138;106863
O00148;O00148-2;K7EQN7;O00148-3;K7EPJ3;A0A0D9SEM9;K7EN69;K7ENP6;K7EL56;K7EIL8;F6SXL5;H0YCC6	O00148;O00148-2;K7EQN7;O00148-3	9;7;6;6;4;3;2;1;1;1;1;1	2;2;2;2;1;2;0;0;0;0;0;0	2;2;2;2;1;2;0;0;0;0;0;0	ATP-dependent RNA helicase DDX39A	DDX39A	ATP-dependent RNA helicase DDX39A;Isoform of O00148, Isoform 2 of ATP-dependent RNA helicase DDX39A;Isoform of O00148, ATP-dependent RNA helicase DDX39A (Fragment);Isoform of O00148, Isoform 3 of ATP-dependent RNA helicase DDX39A	non matrisome	non matrisome	3562200	0	0	0	3562200	0	0		0	1	0	2	0	0	0	0	3				490	1270;1690;2026;3046;3490;3944;5087;5335;8376	False;False;False;False;True;False;False;False;True	1344;1790;2146;3240;3711;4196;5407;5698;8968	16254;16255;16256;16257;16258;16259;21144;21145;21146;25220;25221;38072;45774;51314;51315;51316;51317;51318;51319;51320;51321;51322;64002;64003;64004;64005;64006;64007;64008;67063;102439;102440	17410;17411;17412;17413;17414;17415;22670;22671;22672;27036;27037;40748;49020;54922;54923;54924;54925;54926;54927;54928;54929;54930;68247;68248;68249;68250;68251;68252;68253;71484;109100;109101	17411;22672;27036;40748;49020;54927;68252;71484;109101
A0A0D9SFB3;A0A0D9SG12;A0A0D9SF53;O00571-2;O00571;A0A0J9YVQ7;A0A087WVZ1;O15523-3;D6RCM4;Q9NQI0-3;Q9NQI0-2;Q9NQI0-4;Q9NQI0	A0A0D9SFB3;A0A0D9SG12;A0A0D9SF53;O00571-2;O00571	13;13;13;13;13;5;2;2;1;1;1;1;1	12;12;12;12;12;5;2;2;1;1;1;1;1	2;2;2;2;2;2;1;0;0;0;0;0;0	ATP-dependent RNA helicase DDX3X	DDX3X	Isoform of O00571, ATP-dependent RNA helicase DDX3X;Isoform of O00571, ATP-dependent RNA helicase DDX3X;Isoform of O00571, ATP-dependent RNA helicase DDX3X;Isoform of O00571, Isoform 2 of ATP-dependent RNA helicase DDX3X;ATP-dependent RNA helicase DDX3X	non matrisome	non matrisome	103814000	0	10052000	0	93762000	0	0		1	3	0	16	0	0	0	1	21				111	1445;1560;2010;2035;2743;3051;3610;5333;6307;6993;7991;8005;8774	True;True;True;True;True;True;True;False;True;True;True;True;True	1526;1649;2129;2155;2914;3245;3845;5694;6779;7496;8563;8577;9384	17920;19630;24973;25254;25255;25256;32623;32624;38143;47508;67027;78950;78951;78952;85982;85983;98047;98048;98049;98050;98051;98139;107348	19164;21088;26762;27070;27071;27072;34815;34816;40827;50919;71447;84073;84074;84075;91556;91557;104435;104436;104437;104438;104439;104440;104531;114224	19164;21088;26762;27070;34816;40827;50919;71447;84073;91556;104440;104531;114224	53	352
O15523-2;O15523	O15523-2;O15523	12;12	1;1	1;1	ATP-dependent RNA helicase DDX3Y	DDX3Y	Isoform of O15523, Isoform 2 of ATP-dependent RNA helicase DDX3Y;ATP-dependent RNA helicase DDX3Y	non matrisome	non matrisome	0	0	0	0	0	0	0		0	0	0	1	0	0	0	0	1				516	1445;1560;2010;2035;2743;3610;5333;6307;6993;7990;8005;8774	False;False;False;False;False;False;False;False;False;True;False;False	1526;1649;2129;2155;2914;3845;5694;6779;7496;8562;8577;9384	17920;19630;24973;25254;25255;25256;32623;32624;47508;67027;78950;78951;78952;85982;85983;98046;98139;107348	19164;21088;26762;27070;27071;27072;34815;34816;50919;71447;84073;84074;84075;91556;91557;104434;104531;114224	19164;21088;26762;27070;34816;50919;71447;84073;91556;104434;104531;114224	53	347
O95817;C9JFK9	O95817;C9JFK9	3;2	3;2	3;2	BAG family molecular chaperone regulator 3	BAG3	BAG family molecular chaperone regulator 3;Isoform of O95817, BAG family molecular chaperone regulator 3 (Fragment)	non matrisome	non matrisome	11961000	0	0	0	11961000	0	0		0	0	0	3	0	0	0	0	3				564	2236;3696;5966	True;True;True	2364;3931;6407	27161;48274;74556	29069;51715;79427	29069;51715;79427
P02730-2;P02730;A0A0A0MS98	P02730-2;P02730;A0A0A0MS98	8;8;7	8;8;7	8;8;7	Band 3 anion transport protein	SLC4A1	Isoform of P02730, Isoform 2 of Band 3 anion transport protein;Band 3 anion transport protein;Isoform of P02730, Band 3 anion transport protein	non matrisome	non matrisome	262450000	0	0	0	0	262450000	0		0	0	0	0	0	14	5	0	19				611	120;711;3410;3770;3992;5059;5706;8148	True;True;True;True;True;True;True;True	126;749;3628;4008;4249;5376;6134;8727	1220;1221;1222;1223;1224;1225;1226;7823;44729;49259;49260;51951;51952;51953;63798;71834;71835;99904;99905	1281;1282;1283;1284;1285;1286;1287;8248;47908;52778;52779;55612;55613;55614;68040;76543;76544;106392;106393	1284;8248;47908;52779;55613;68040;76544;106392
E9PII3;E9PK52;E9PHY5;O43491-2;O43491-3;O43491-4;O43491	E9PII3;E9PK52;E9PHY5;O43491-2;O43491-3;O43491-4;O43491	3;3;3;3;3;3;3	3;3;3;3;3;3;3	3;3;3;3;3;3;3	Band 4.1-like protein 2	EPB41L2	Isoform of O43491, Band 4.1-like protein 2;Isoform of O43491, Band 4.1-like protein 2;Isoform of O43491, Band 4.1-like protein 2;Isoform of O43491, Isoform 2 of Band 4.1-like protein 2;Isoform of O43491, Isoform 3 of Band 4.1-like protein 2;Isoform of O434	non matrisome	non matrisome	4931600	0	0	0	0	4931600	0		0	1	0	2	0	2	0	0	5				323	5197;7821;8319	True;True;True	5519;8388;8910	65275;96135;96136;101980;101981	69590;102419;102420;108599;108600	69590;102420;108599
O75531;E9PJJ8	O75531	4;1	4;1	4;1	Barrier-to-autointegration factor;Barrier-to-autointegration factor, N-terminally processed	BANF1	Barrier-to-autointegration factor	non matrisome	non matrisome	109169000	0	71831000	0	37338000	0	0		0	7	3	3	0	0	0	1	14				547	869;1205;3571;5953	True;True;True;True	915;1276;3797;6393	9714;9715;15650;15651;46721;46722;46723;74489;74490;74491;74492;74493;74494;74495;74496	10239;10240;16764;16765;50041;50042;50043;79357;79358;79359;79360;79361;79362;79363;79364	10239;16764;50041;79357
A0A087WXM8;P50895;K7ENU8	A0A087WXM8;P50895;K7ENU8	10;10;7	10;10;7	10;10;7	Basal cell adhesion molecule	BCAM	Isoform of P50895, Basal cell adhesion molecule;Basal cell adhesion molecule;Isoform of P50895, Basal cell adhesion molecule (Fragment)	non matrisome	non matrisome	27841000	0	0	0	0	17291000	10550000		0	1	1	0	13	3	0	2	20				38	280;1320;1910;1912;2776;3258;5060;5161;5162;7808	True;True;True;True;True;True;True;True;True;True	296;1398;2020;2022;2949;3465;5377;5482;5483;8373	2452;2453;2454;2455;2456;16901;23279;23281;32904;42574;42575;63799;63800;63801;63802;64846;64847;95983;95984;95985;95986;95987	2560;2561;2562;2563;2564;18079;24927;24929;35109;45567;45568;68041;68042;68043;68044;69125;69126;102266;102267;102268;102269;102270	2564;18079;24927;24929;35109;45568;68043;69125;69126;102266
P98160;A0A0U1RQT3;H0Y5A9;H7BYA5	P98160	192;9;3;2	192;9;3;2	192;9;3;2	Basement membrane-specific heparan sulfate proteoglycan core protein;Endorepellin;LG3 peptide	HSPG2	Basement membrane-specific heparan sulfate proteoglycan core protein	Core matrisome	Proteoglycans	301012000000	52333000000	55878000000	41453000000	43383000000	55294000000	52671000000		477	959	463	766	1020	841	611	847	5984				998	38;39;71;107;209;210;243;299;366;367;457;458;541;593;595;614;615;621;636;713;718;719;736;804;832;883;908;934;938;944;946;951;993;1011;1039;1046;1070;1077;1080;1081;1102;1111;1142;1143;1264;1569;1604;1772;1773;1807;1891;1926;1927;1966;2157;2203;2212;2251;2299;2373;2384;2516;2579;2580;2599;2753;2780;2974;2975;2996;3129;3202;3237;3283;3287;3304;3333;3457;3527;3554;3557;3560;3569;3570;3638;3732;3733;…	True;True;True;True;True;True;True;True;True;True;True;True;True;True;True;True;True;True;True;True;True;True;True;True;True;True;True;True;True;True;True;True;True;True;True;True;True;True;True;True;True;True;True;True;True;True;True;True;True;True;True;True;True;True;True;True;True;True;True;True;True;True;True;True;True;True;True;True;True;True;True;True;True;True;True;True;True;True;True;True…	39;40;75;113;221;222;257;315;316;384;385;479;480;567;568;627;629;649;650;656;672;751;756;757;775;844;874;929;958;985;989;996;998;1003;1004;1047;1068;1100;1107;1134;1141;1144;1145;1170;1171;1180;1211;1212;1338;1659;1698;1879;1880;1915;2001;2036;2037;2079;2080;2280;2329;2330;2339;2379;2432;2508;2509;2521;2667;2734;2735;2755;2926;2953;3167;3168;3189;3327;3328;3408;3444;3492;3496;3513;3546;3676;3750;…	313;314;315;316;317;318;319;320;321;322;323;324;325;326;327;328;329;330;331;332;333;334;335;336;337;338;339;340;341;342;343;344;345;346;347;348;349;350;351;352;353;354;355;356;357;648;649;650;651;652;653;654;655;656;657;658;659;660;661;662;663;664;665;666;667;668;669;670;671;672;673;674;675;676;677;678;679;680;681;682;683;684;685;686;687;688;689;690;691;692;693;694;695;696;697;698;699;700;701;702…
B5MCE7;B5MCH7;E7ETZ4;Q9Y6E2;E9PFD4	B5MCE7;B5MCH7;E7ETZ4;Q9Y6E2;E9PFD4	3;3;3;3;2	3;3;3;3;2	2;2;2;2;1	Basic leucine zipper and W2 domain-containing protein 2	BZW2	Isoform of Q9Y6E2, Basic leucine zipper and W2 domain-containing protein 2;Isoform of Q9Y6E2, Basic leucine zipper and W2 domain-containing protein 2;Isoform of Q9Y6E2, Basic leucine zipper and W2 domain-containing protein 2 (Fragment);Basic leucine zipper	non matrisome	non matrisome	16832000	0	0	0	16832000	0	0		1	1	0	4	0	0	0	0	6				186	159;1855;4189	True;True;True	169;1964;4458	1619;22883;54161;54162;54163;54164	1699;24503;57951;57952;57953;57954	1699;24503;57951
P51572;P51572-2;C9JMD7;C9JSP1;C9JQ75;C9J0M4	P51572;P51572-2;C9JMD7;C9JSP1;C9JQ75;C9J0M4	2;2;1;1;1;1	2;2;1;1;1;1	2;2;1;1;1;1	B-cell receptor-associated protein 31	BCAP31	B-cell receptor-associated protein 31;Isoform of P51572, Isoform 2 of B-cell receptor-associated protein 31;Isoform of P51572, B-cell receptor-associated protein 31 (Fragment);Isoform of P51572, B-cell receptor-associated protein 31 (Fragment);Isoform of P	non matrisome	non matrisome	9148400	0	0	0	9148400	0	0		0	1	0	2	0	0	0	0	3				900	221;4414	True;True	235;4693	1953;56514;56515	2041;60408;60409	2041;60409
E9PJA7;E9PK09;E9PQN2;E9PKI6;E9PK91;Q9NYF8-4;Q9NYF8-3;Q9NYF8-2;Q9NYF8;H0YF00	E9PJA7;E9PK09;E9PQN2;E9PKI6;E9PK91;Q9NYF8-4;Q9NYF8-3;Q9NYF8-2;Q9NYF8;H0YF00	2;2;2;2;2;2;2;2;2;1	2;2;2;2;2;2;2;2;2;1	2;2;2;2;2;2;2;2;2;1	Bcl-2-associated transcription factor 1	BCLAF1	Isoform of Q9NYF8, Bcl-2-associated transcription factor 1;Isoform of Q9NYF8, Bcl-2-associated transcription factor 1 (Fragment);Isoform of Q9NYF8, Bcl-2-associated transcription factor 1;Isoform of Q9NYF8, Bcl-2-associated transcription factor 1;Isoform o	non matrisome	non matrisome	4529400	0	0	0	4529400	0	0		0	1	0	1	0	0	0	0	2				328	1626;7427	True;True	1721;7960	20370;91468	21871;97465	21871;97465
Q96L58	Q96L58	2	2	2	Beta-1,3-galactosyltransferase 6	B3GALT6	Beta-1,3-galactosyltransferase 6	non matrisome	non matrisome	0	0	0	0	0	0	0		0	1	1	0	1	0	0	0	3				1184	2363;4376	True;True	2498;4654	28332;28333;56159	30272;30273;60043	30272;60043
Q8NES3-3;Q8NES3;A0A087X191;Q8NES3-2;Q8NES3-4	Q8NES3-3;Q8NES3;A0A087X191;Q8NES3-2;Q8NES3-4	4;4;2;2;2	4;4;2;2;2	4;4;2;2;2	Beta-1,3-N-acetylglucosaminyltransferase lunatic fringe	LFNG	Isoform of Q8NES3, Isoform 3 of Beta-1,3-N-acetylglucosaminyltransferase lunatic fringe;Beta-1,3-N-acetylglucosaminyltransferase lunatic fringe;Isoform of Q8NES3, Beta-1,3-N-acetylglucosaminyltransferase lunatic fringe;Isoform of Q8NES3, Isoform 2 of Beta-	non matrisome	non matrisome	34629000	0	34629000	0	0	0	0		0	7	3	3	3	4	0	3	23				1156	2108;3175;5270;5854	True;True;True;True	2230;3379;5602;6289	25810;25811;40940;66268;66269;73599;73600;73601;73602;73603;73604;73605;73606;73607;73608;73609;73610;73611;73612;73613;73614;73615;73616;73617	27672;27673;43758;70635;70636;78418;78419;78420;78421;78422;78423;78424;78425;78426;78427;78428;78429;78430;78431;78432;78433;78434;78435;78436	27672;43758;70635;78432	692;693	144;181
O00587;A0A1B0GX02;A9UJQ1;O00587-2;REV__A0A1B0GX02;A9UJP9;REV__A9UJQ1;REV__O00587-2;REV__O00587;P80365	O00587;A0A1B0GX02;A9UJQ1;O00587-2	3;2;2;2;1;1;1;1;1;1	3;2;2;2;1;1;1;1;1;1	3;2;2;2;1;1;1;1;1;1	Beta-1,3-N-acetylglucosaminyltransferase manic fringe	MFNG	Beta-1,3-N-acetylglucosaminyltransferase manic fringe;Isoform of O00587, Beta-1,3-N-acetylglucosaminyltransferase manic fringe (Fragment);Isoform of O00587, Beta-1,3-N-acetylglucosaminyltransferase manic fringe (Fragment);Isoform of O00587, Isoform 2 of Be	non matrisome	non matrisome	0	0	0	0	0	0	0		0	4	0	1	4	0	0	0	9				500	480;2182;5253	True;True;True	502;2306;5576	5157;5158;5159;5160;5161;5162;5163;26596;65971	5439;5440;5441;5442;5443;5444;5445;28487;70315	5444;28487;70315	184	123
P02749;J3KS17;J3QLI0;J3QRN2;CON__P17690	P02749	7;3;3;2;1	7;3;3;2;1	7;3;3;2;1	Beta-2-glycoprotein 1	APOH	Beta-2-glycoprotein 1	non matrisome	non matrisome	668301000	72691000	128890000	0	93640000	252320000	120760000		3	15	0	7	16	22	6	13	82				616	734;765;1038;1101;7253;7271;7816	True;True;True;True;True;True;True	773;804;1099;1169;7775;7794;8382	8142;8143;8144;8145;8146;8147;8148;8372;8373;8374;8375;8376;8377;8378;8379;8380;8381;8382;13016;13017;13018;13019;13020;13021;14520;14521;14522;14523;14524;14525;89534;89535;89536;89537;89538;89539;89540;89541;89542;89543;89544;89545;89546;89547;89548;89549;89550;89551;89552;89553;89809;96037;96038;96039;96040;96041;96042;96043;96044;96045;96046;96047;96048;96049;96050;96051;96052;96053;96054;960…	8589;8590;8591;8592;8593;8594;8595;8825;8826;8827;8828;8829;8830;8831;8832;8833;8834;8835;13764;13765;13766;13767;13768;13769;13770;15546;15547;15548;15549;15550;15551;15552;95346;95347;95348;95349;95350;95351;95352;95353;95354;95355;95356;95357;95358;95359;95360;95361;95362;95363;95364;95365;95366;95660;102321;102322;102323;102324;102325;102326;102327;102328;102329;102330;102331;102332;102333;10…	8590;8828;13767;15547;95348;95660;102341
Q13425-2;Q13425;H0YCS0;A0A140TA73;Q13884-2;Q13884	Q13425-2;Q13425;H0YCS0;A0A140TA73;Q13884-2;Q13884	2;2;1;1;1;1	2;2;1;1;1;1	2;2;1;1;1;1	Beta-2-syntrophin;Beta-1-syntrophin	SNTB2;SNTB1	Isoform of Q13425, Isoform 2 of Beta-2-syntrophin;Beta-2-syntrophin;Isoform of Q13425, Beta-2-syntrophin (Fragment);Isoform of Q13425, Beta-2-syntrophin (Fragment);Isoform of Q13884, Isoform 2 of Beta-1-syntrophin;Beta-1-syntrophin	non matrisome	non matrisome	0	0	0	0	0	0	0		0	0	0	1	0	0	0	1	2				1047	317;2284	True;True	334;2415	2958;27482	3100;29403	3100;29403
Q562R1	Q562R1	8	1	1	Beta-actin-like protein 2	ACTBL2	Beta-actin-like protein 2	cytoskeleton	non matrisome	53324000	0	0	53324000	0	0	0		0	0	1	0	0	0	0	0	1	+			1100	922;1478;3558;3836;3837;4399;7189;7779	False;False;False;False;False;False;False;True	972;1559;1560;3782;3783;3784;4082;4083;4677;4678;7704;8343	10532;10533;10534;10535;10536;10537;10538;18356;18357;18358;18359;18360;18361;18362;18363;18364;18365;18366;18367;18368;18369;18370;18371;18372;18373;18374;18375;18376;18377;18378;18379;18380;18381;18382;18383;18384;18385;18386;18387;18388;18389;18390;18391;18392;18393;18394;18395;18396;18397;18398;18399;18400;18401;18402;18403;18404;18405;18406;18407;18408;18409;46575;46576;46577;46578;46579;465…	11116;11117;11118;11119;11120;11121;11122;19636;19637;19638;19639;19640;19641;19642;19643;19644;19645;19646;19647;19648;19649;19650;19651;19652;19653;19654;19655;19656;19657;19658;19659;19660;19661;19662;19663;19664;19665;19666;19667;19668;19669;19670;19671;19672;19673;19674;19675;19676;19677;19678;19679;19680;19681;19682;19683;19684;19685;19686;19687;19688;19689;19690;49890;49891;49892;49893;498…	11116;19639;49919;53782;53814;60239;94438;101748	530;533;534	45;48;191
P01138	P01138	2	2	2	Beta-nerve growth factor	NGF	Beta-nerve growth factor	Matrisome-associated	Secreted Factors	0	0	0	0	0	0	0		0	3	2	0	3	2	3	3	16				590	3699;6304	True;True	3934;6776	48298;48299;48300;48301;48302;48303;48304;48305;48306;48307;48308;48309;48310;48311;48312;48313;48314;48315;78936	51740;51741;51742;51743;51744;51745;51746;51747;51748;51749;51750;51751;51752;51753;51754;51755;51756;51757;84059	51744;84059
P21810	P21810	15	15	7	Biglycan	BGN	Biglycan	Core matrisome	Proteoglycans	49352700000	6748000000	8366000000	8755400000	9863700000	10056000000	5563600000		63	82	67	97	81	89	77	80	636				771	269;1457;2015;2016;2056;3098;3368;4004;4306;4558;5509;5599;8008;8266;8503	True;True;True;True;True;True;True;True;True;True;True;True;True;True;True	283;1538;2134;2135;2177;3293;3583;4261;4579;4843;5919;6015;6016;6017;8580;8581;8856;9107	2360;2361;2362;2363;2364;2365;2366;2367;2368;2369;2370;2371;2372;2373;2374;2375;2376;2377;2378;2379;2380;2381;2382;2383;2384;2385;18046;18047;18048;18049;18050;18051;18052;18053;18054;18055;18056;18057;18058;18059;18060;18061;18062;18063;18064;18065;18066;18067;18068;18069;18070;18071;18072;18073;18074;18075;18076;18077;18078;18079;18080;18081;18082;18083;18084;18085;18086;18087;18088;18089;18090…	2462;2463;2464;2465;2466;2467;2468;2469;2470;2471;2472;2473;2474;2475;2476;2477;2478;2479;2480;2481;2482;2483;2484;2485;2486;2487;2488;19290;19291;19292;19293;19294;19295;19296;19297;19298;19299;19300;19301;19302;19303;19304;19305;19306;19307;19308;19309;19310;19311;19312;19313;19314;19315;19316;19317;19318;19319;19320;19321;19322;19323;19324;19325;19326;19327;19328;19329;19330;19331;19332;19333;…	2487;19376;26808;26841;27215;41661;47276;55754;58980;61849;73827;75288;104589;107788;111070	93;94;404	185;190;323
K7ESE8;J3KSD8;K7ES02;Q13867	K7ESE8;J3KSD8;K7ES02;Q13867	1;1;1;1	1;1;1;1	1;1;1;1	Bleomycin hydrolase	BLMH	Isoform of Q13867, Bleomycin hydrolase (Fragment);Isoform of Q13867, Bleomycin hydrolase (Fragment);Isoform of Q13867, Bleomycin hydrolase (Fragment);Bleomycin hydrolase	non matrisome	non matrisome	3922400	3922400	0	0	0	0	0		1	0	0	0	0	0	0	0	1				458	3814	TRUE	4056	49754	53296	53296
Q8N8U9	Q8N8U9	10	10	10	BMP-binding endothelial regulator protein	BMPER	BMP-binding endothelial regulator protein	Core matrisome	ECM Glycoproteins	73488000	0	0	0	0	39483000	34005000		0	1	0	3	14	10	0	5	33				1150	1212;1228;2388;4356;6020;6344;7144;7921;8355;8601	True;True;True;True;True;True;True;True;True;True	1283;1300;2525;4631;6466;6816;7654;8492;8947;9206	15689;15690;15691;15779;28665;28666;55678;55679;55680;75137;75138;75139;79436;79437;88032;88033;88034;88035;88036;88037;88038;88039;88040;88041;97195;97196;102314;102315;102316;102317;102318;102319;105304	16804;16805;16806;16903;30616;30617;59527;59528;59529;80031;80032;80033;84597;84598;93726;93727;93728;93729;93730;93731;93732;93733;93734;93735;103535;103536;108972;108973;108974;108975;108976;108977;108978;112074	16806;16903;30616;59529;80033;84597;93726;103535;108978;112074
P13727;P13727-2	P13727;P13727-2	8;6	8;6	8;6	Bone marrow proteoglycan;Eosinophil granule major basic protein	PRG2	Bone marrow proteoglycan;Isoform of P13727, Isoform 2 of Bone marrow proteoglycan	Core matrisome	Proteoglycans	127437000	0	77756000	0	0	49681000	0		0	10	2	1	29	4	0	0	46				732	2562;2954;3146;4009;4848;6461;6945;6946	True;True;True;True;True;True;True;True	2714;3147;3347;4267;5149;6940;7447;7448	30664;30665;30666;30667;30668;30669;37110;37111;37112;37113;37114;37115;37116;37117;37118;37119;39468;39469;39470;39471;39472;39473;39474;39475;39476;39477;39478;52176;52177;52178;52179;61196;61197;80684;80685;80686;80687;85479;85480;85481;85482;85483;85484;85485;85486;85487	32744;32745;32746;32747;32748;32749;39740;39741;39742;39743;39744;39745;39746;39747;39748;39749;39750;42215;42216;42217;42218;42219;42220;42221;42222;42223;42224;42225;55873;55874;55875;55876;65305;65306;85898;85899;85900;85901;91032;91033;91034;91035;91036;91037;91038;91039;91040;91041	32746;39742;42222;55874;65305;85900;91036;91040
Q96CX2	Q96CX2	1	1	1	BTB/POZ domain-containing protein KCTD12	KCTD12	BTB/POZ domain-containing protein KCTD12	non matrisome	non matrisome	4616700	0	0	0	4616700	0	0		1	0	0	1	0	0	0	0	2				1179	2534	TRUE	2686	30296;30297	32360;32361	32361
J3KS31;J3QRS9;X6R4W8;O43670-3;O43670-2;O43670;O43670-4	J3KS31;J3QRS9;X6R4W8;O43670-3;O43670-2;O43670;O43670-4	1;1;1;1;1;1;1	1;1;1;1;1;1;1	1;1;1;1;1;1;1	BUB3-interacting and GLEBS motif-containing protein ZNF207	ZNF207	Isoform of O43670, BUB3-interacting and GLEBS motif-containing protein ZNF207 (Fragment);Isoform of O43670, BUB3-interacting and GLEBS motif-containing protein ZNF207;Isoform of O43670, BUB3-interacting and GLEBS motif-containing protein ZNF207;Isoform of	non matrisome	non matrisome	0	0	0	0	0	0	0		1	1	1	2	1	2	0	1	9				457	5762	TRUE	6196	72416;72417;72418;72419;72420;72421;72422;72423;72424;72425	77172;77173;77174;77175;77176;77177;77178;77179;77180;77181	77180
P11586;F5H2F4;V9GYY3	P11586;F5H2F4	8;7;1	8;7;1	8;7;1	C-1-tetrahydrofolate synthase, cytoplasmic;Methylenetetrahydrofolate dehydrogenase;Methenyltetrahydrofolate cyclohydrolase;Formyltetrahydrofolate synthetase;C-1-tetrahydrofolate synthase, cytoplasmic, N-terminally processed	MTHFD1	C-1-tetrahydrofolate synthase, cytoplasmic;Isoform of P11586, C-1-tetrahydrofolate synthase, cytoplasmic	non matrisome	non matrisome	26345000	0	0	0	26345000	0	0		0	2	0	11	0	0	0	0	13				709	862;1665;2709;3384;5181;7285;7288;7586	True;True;True;True;True;True;True;True	908;1762;2880;3602;5502;7810;7813;8136	9577;20883;20884;32191;32192;32193;32194;44386;44387;65017;89946;89953;93301;93302	10095;22406;22407;34343;34344;34345;34346;47517;47518;69303;95801;95809;99416;99417	10095;22406;34345;47518;69303;95801;95809;99417
P04003	P04003	6	6	6	C4b-binding protein alpha chain	C4BPA	C4b-binding protein alpha chain	non matrisome	non matrisome	63390000	0	0	0	0	63390000	0		0	0	0	1	10	7	0	0	18				625	2573;3302;3372;3428;5026;8609	True;True;True;True;True;True	2727;3511;3589;3647;5340;9214	30863;43315;43316;43317;43318;44274;44275;44951;44952;63550;63551;63552;63553;63554;63555;63556;63557;63558;105393;105394;105395	32946;46365;46366;46367;46368;47379;47380;48144;48145;67790;67791;67792;67793;67794;67795;67796;67797;67798;112163;112164;112165	32946;46368;47380;48145;67796;112164
P20851-2;P20851	P20851-2;P20851	1;1	1;1	1;1	C4b-binding protein beta chain	C4BPB	Isoform of P20851, Isoform 2 of C4b-binding protein beta chain;C4b-binding protein beta chain	non matrisome	non matrisome	0	0	0	0	0	0	0		0	0	0	0	3	0	0	0	3				767	472	TRUE	494	5109;5110;5111	5391;5392;5393	5392
F8VPD4;P27708	F8VPD4;P27708	1;1	1;1	1;1	CAD protein;Glutamine-dependent carbamoyl-phosphate synthase;Aspartate carbamoyltransferase;Dihydroorotase	CAD	Isoform of P27708, CAD protein;CAD protein	non matrisome	non matrisome	3896600	0	0	0	3896600	0	0		0	0	0	1	0	0	0	0	1				363	53	TRUE	54	466	479	479
H3BVI7;H3BNC6;A0A087WX17;A0A087WU43;A0A087WXI5;P12830-2;P12830	H3BVI7;H3BNC6;A0A087WX17;A0A087WU43;A0A087WXI5;P12830-2;P12830	3;3;3;3;3;3;3	3;3;3;3;3;3;3	3;3;3;3;3;3;3	Cadherin-1;E-Cad/CTF1;E-Cad/CTF2;E-Cad/CTF3	CDH1	Isoform of P12830, Cadherin-1;Isoform of P12830, Cadherin-1;Isoform of P12830, Cadherin-1;Isoform of P12830, Cadherin-1;Isoform of P12830, Cadherin-1;Isoform of P12830, Isoform 2 of Cadherin-1;Cadherin-1	non matrisome	non matrisome	389639000	0	111230000	106720000	49802000	67981000	53906000		0	13	7	7	8	6	2	6	49				25	7242;8006;8218	True;True;True	7764;8578;8807	89433;89434;89435;89436;89437;89438;89439;89440;89441;89442;89443;89444;89445;89446;89447;89448;89449;89450;89451;89452;89453;89454;89455;89456;89457;89458;98140;98141;98142;98143;98144;98145;98146;98147;98148;98149;98150;98151;98152;98153;98154;98155;98156;100618;100619;100620;100621;100622	95242;95243;95244;95245;95246;95247;95248;95249;95250;95251;95252;95253;95254;95255;95256;95257;95258;95259;95260;95261;95262;95263;95264;95265;95266;95267;104532;104533;104534;104535;104536;104537;104538;104539;104540;104541;104542;104543;104544;104545;104546;104547;104548;107124;107125;107126;107127;107128;107129	95248;104548;107125
Q9HB71-3;Q9HB71;Q9HB71-2	Q9HB71-3;Q9HB71	3;3;1	3;3;1	3;3;1	Calcyclin-binding protein	CACYBP	Isoform of Q9HB71, Isoform 3 of Calcyclin-binding protein;Calcyclin-binding protein	non matrisome	non matrisome	73320000	0	0	0	73320000	0	0		0	2	0	3	0	0	0	0	5				1222	208;6758;7197	True;True;True	220;7252;7712	1835;83566;83567;83568;88782	1921;88995;88996;88997;94563	1921;88996;94563
Q05682;Q05682-4;Q05682-6;Q05682-2;E7EX44;Q05682-5;Q05682-3;E9PGZ1;C9J813;C9JEK3;C9JE79;F8WE61;REV__H0YH95;REV__H0YEF9;REV__E9PJZ7;REV__H0YHK3;REV__O75334-6;REV__O75334-5;REV__Q13136-2;REV__Q13136;REV__O75334-2;REV__O75334-4;REV__G3V200;REV__O75334-3;REV__O75334	Q05682;Q05682-4;Q05682-6;Q05682-2;E7EX44;Q05682-5;Q05682-3;E9PGZ1;C9J813	23;20;20;20;19;19;19;18;17;4;1;1;1;1;1;1;1;1;1;1;1;1;1;1;1	23;20;20;20;19;19;19;18;17;4;1;1;1;1;1;1;1;1;1;1;1;1;1;1;1	23;20;20;20;19;19;19;18;17;4;1;1;1;1;1;1;1;1;1;1;1;1;1;1;1	Caldesmon	CALD1	Caldesmon;Isoform of Q05682, Isoform 4 of Caldesmon;Isoform of Q05682, Isoform 6 of Caldesmon;Isoform of Q05682, Isoform 2 of Caldesmon;Isoform of Q05682, Caldesmon;Isoform of Q05682, Isoform 5 of Caldesmon;Isoform of Q05682, Isoform 3 of Caldesmon;Isoform	non matrisome	non matrisome	2826710000	504360000	240880000	496310000	861950000	164560000	558650000		14	18	18	46	21	9	19	37	182				1018	1739;1877;1878;2859;3157;3596;3670;3967;4898;5355;5365;5739;5930;6050;6217;6395;6413;6466;6540;7646;7671;8110;8651	True;True;True;True;True;True;True;True;True;True;True;True;True;True;True;True;True;True;True;True;True;True;True	1844;1987;1988;3043;3359;3828;3905;4222;5203;5729;5742;6171;6369;6502;6680;6871;6890;6945;7023;8199;8228;8688;9259	21871;22990;22991;22992;22993;22994;22995;22996;22997;22998;22999;23000;23001;23002;23003;23004;23005;23006;23007;23008;23009;23010;23011;23012;23013;23014;23015;23016;23017;23018;35228;39699;39700;39701;39702;39703;39704;39705;39706;39707;39708;39709;39710;47334;47335;47336;47337;47338;47339;47340;47341;47342;47343;47344;47345;47346;47347;47348;48138;48139;51694;51695;51696;51697;51698;51699;517…	23448;24612;24613;24614;24615;24616;24617;24618;24619;24620;24621;24622;24623;24624;24625;24626;24627;24628;24629;24630;24631;24632;24633;24634;24635;24636;24637;24638;24639;24640;24641;24642;37651;42472;42473;42474;42475;42476;42477;42478;42479;42480;42481;42482;42483;42484;42485;42486;50742;50743;50744;50745;50746;50747;50748;50749;50750;50751;50752;50753;50754;50755;50756;51577;51578;55343;553…	23448;24613;24631;37651;42477;50747;51577;55346;65959;71724;71880;76947;79245;80361;82687;85126;85268;85957;86672;100093;100386;105868;112710	609;610	137;622
F8WBR5;M0QZ52;G3V479;H0Y7A7;P62158;E7ETZ0;E7EMB3;P27482	F8WBR5;M0QZ52;G3V479;H0Y7A7;P62158;E7ETZ0;E7EMB3;P27482	2;2;2;2;2;1;1;1	2;2;2;2;2;1;1;1	2;2;2;2;2;1;1;1	Calmodulin;Calmodulin-like protein 3	CALM2;CALM3;CALM1;CALML3	Isoform of P62158, Calmodulin;Isoform of P62158, Calmodulin;Isoform of P62158, Calmodulin;Isoform of P62158, Calmodulin (Fragment);Calmodulin;Isoform of P62158, Calmodulin;Isoform of P62158, Calmodulin;Calmodulin-like protein 3	non matrisome	non matrisome	10568000	0	0	0	10568000	0	0		0	0	0	2	0	1	0	0	3				380	146;1750	True;True	156;1856	1508;1509;21996	1583;1584;23575	1583;23575
Q9NZT1	Q9NZT1	6	6	6	Calmodulin-like protein 5	CALML5	Calmodulin-like protein 5	non matrisome	non matrisome	67984000	0	0	0	33878000	34106000	0		1	2	0	10	0	11	5	2	31				1239	248;268;293;644;1736;5585	True;True;True;True;True;True	262;282;309;680;1841;6000	2240;2339;2340;2341;2342;2343;2344;2345;2346;2347;2348;2349;2350;2351;2352;2353;2354;2355;2356;2357;2358;2359;2662;2663;2664;6970;6971;21866;70490	2338;2439;2440;2441;2442;2443;2444;2445;2446;2447;2448;2449;2450;2451;2452;2453;2454;2455;2456;2457;2458;2459;2460;2461;2789;2790;2791;7346;7347;23443;75127	2338;2458;2790;7347;23443;75127
P27824;P27824-2;P27824-3;H0Y9Q7;D6RGY2;D6RFL1;D6RB85;D6RDP7;H0Y9H1;D6RAU8;D6RHJ3;D6RD16;D6RAQ8	P27824;P27824-2;P27824-3;H0Y9Q7;D6RGY2	9;9;8;5;5;4;3;3;3;2;1;1;1	9;9;8;5;5;4;3;3;3;2;1;1;1	9;9;8;5;5;4;3;3;3;2;1;1;1	Calnexin	CANX	Calnexin;Isoform of P27824, Isoform 2 of Calnexin;Isoform of P27824, Isoform 3 of Calnexin;Isoform of P27824, Calnexin (Fragment);Isoform of P27824, Calnexin (Fragment)	non matrisome	non matrisome	235676000	0	80880000	63107000	91689000	0	0		0	11	4	13	1	1	0	0	30				806	590;945;3116;3980;4161;5790;6678;7564;7589	True;True;True;True;True;True;True;True;True	623;997;3311;4235;4428;6224;7170;8114;8139	6477;11090;11091;39065;39066;51809;51810;53884;53885;53886;53887;53888;72741;72742;72743;72744;72745;72746;72747;72748;83046;93042;93043;93044;93045;93046;93047;93048;93049;93050;93327	6843;11718;11719;41800;41801;55467;55468;57662;57663;57664;57665;57666;77511;77512;77513;77514;77515;77516;77517;77518;88443;99125;99126;99127;99128;99129;99130;99131;99132;99133;99444	6843;11718;41800;55468;57665;77517;88443;99129;99444
K7ES69;A0A087X271;B4DDF4;B4DUT8;Q99439-2;Q99439;H3BVI6;A0A087WV51;H3BQH0;A0A087X1X5	K7ES69;A0A087X271;B4DDF4;B4DUT8;Q99439-2;Q99439;H3BVI6	3;3;3;3;3;3;2;1;1;1	3;3;3;3;3;3;2;1;1;1	3;3;3;3;3;3;2;1;1;1	Calponin;Calponin-2	CNN2	Isoform of Q99439, Calponin-2;Isoform of Q99439, Calponin (Fragment);Isoform of Q99439, Calponin;Isoform of Q99439, Calponin;Isoform of Q99439, Isoform 2 of Calponin-2;Calponin-2;Isoform of Q99439, Calponin (Fragment)	cytoskeleton	non matrisome	16209000	0	0	0	0	0	16209000		1	0	0	3	0	0	0	3	7				57	1345;6968;7722	True;True;True	1423;7471;8282	17038;17039;17040;17041;17042;85763;85764;94897	18225;18226;18227;18228;18229;91333;91334;101099	18228;91334;101099
P51911;P51911-2;B7Z7E1;K7ERM8;K7EQ72;K7ER02;K7ENC5;K7ERK4;K7ESJ2	P51911;P51911-2	18;15;8;5;5;5;3;3;2	18;15;8;5;5;5;3;3;2	18;15;8;5;5;5;3;3;2	Calponin-1	CNN1	Calponin-1;Isoform of P51911, Isoform 2 of Calponin-1	cytoskeleton	non matrisome	29379400000	4924800000	2448100000	3433300000	9988400000	1424400000	7160400000		46	52	45	101	44	38	44	77	447				905	1318;2161;2162;2318;2319;2356;2727;3128;3167;3810;3966;4577;5522;5833;6425;7058;7059;8638	True;True;True;True;True;True;True;True;True;True;True;True;True;True;True;True;True;True	1396;2284;2285;2452;2453;2490;2491;2898;3325;3326;3370;4051;4052;4221;4862;4863;5933;5934;6268;6902;6903;7563;7564;9246	16860;16861;16862;16863;16864;16865;16866;16867;16868;16869;16870;16871;16872;16873;16874;16875;16876;16877;16878;16879;16880;16881;16882;16883;26386;26387;26388;26389;27817;27818;27819;27820;27821;27822;27823;27824;27825;27826;27827;27828;27829;27830;27831;27832;27833;27834;27835;27836;27837;27838;27839;27840;27841;27842;27843;27844;27845;27846;27847;27848;27849;27850;27851;27852;27853;27854;278…	18035;18036;18037;18038;18039;18040;18041;18042;18043;18044;18045;18046;18047;18048;18049;18050;18051;18052;18053;18054;18055;18056;18057;18058;18059;18060;18061;28275;28276;28277;28278;29741;29742;29743;29744;29745;29746;29747;29748;29749;29750;29751;29752;29753;29754;29755;29756;29757;29758;29759;29760;29761;29762;29763;29764;29765;29766;29767;29768;29769;29770;29771;29772;29773;29774;29775;297…	18035;28276;28277;29741;29807;30216;34663;41894;43722;53181;55293;62075;74094;78193;85428;92428;92437;112499	507;508;509;510;511;512	51;130;168;179;208;258
Q15417-2;Q15417;E9PDU6;Q15417-3	Q15417-2;Q15417;E9PDU6;Q15417-3	4;4;3;3	4;4;3;3	4;4;3;3	Calponin-3;Calponin	CNN3	Isoform of Q15417, Isoform 2 of Calponin-3;Calponin-3;Isoform of Q15417, Calponin (Fragment);Isoform of Q15417, Isoform 3 of Calponin-3	cytoskeleton	non matrisome	83834000	0	0	0	83834000	0	0		1	4	0	9	3	1	2	4	24				1084	397;1319;2903;3125	True;True;True;True	416;1397;3092;3320	4095;4096;4097;16884;16885;16886;16887;16888;16889;16890;16891;16892;16893;16894;16895;16896;16897;16898;16899;16900;35859;35860;35861;39112	4319;4320;4321;18062;18063;18064;18065;18066;18067;18068;18069;18070;18071;18072;18073;18074;18075;18076;18077;18078;38324;38325;38326;41848	4320;18072;38326;41848	655;656	57;217
P27797;K7EJB9;K7EL50	P27797;K7EJB9	8;5;2	8;5;2	8;5;2	Calreticulin	CALR	Calreticulin;Isoform of P27797, Calreticulin (Fragment)	non matrisome	non matrisome	159681000	0	74635000	0	85046000	0	0		0	9	3	9	0	0	0	0	21				805	2163;2676;3100;3470;3685;3884;6121;8034	True;True;True;True;True;True;True;True	2286;2845;3295;3689;3920;4133;6581;8607	26390;31952;31953;31954;31955;31956;31957;38933;45493;45494;45495;45496;45497;48238;48239;50718;50719;50720;76479;98567;98568;98569	28279;34089;34090;34091;34092;34093;34094;41663;48715;48716;48717;48718;48719;48720;51679;51680;54309;54310;54311;81494;104995;104996;104997	28279;34094;41663;48715;51679;54310;81494;104997
O43852-13;O43852-14;O43852-9;O43852-11;O43852-10;O43852-5;O43852-6;O43852;O43852-3;O43852-12;O43852-7;O43852-8;O43852-2;O43852-4	O43852-13;O43852-14;O43852-9;O43852-11;O43852-10;O43852-5;O43852-6;O43852;O43852-3;O43852-12;O43852-7;O43852-8;O43852-2;O43852-4	2;2;2;2;2;2;2;2;2;1;1;1;1;1	2;2;2;2;2;2;2;2;2;1;1;1;1;1	2;2;2;2;2;2;2;2;2;1;1;1;1;1	Calumenin	CALU	Isoform of O43852, Isoform 13 of Calumenin;Isoform of O43852, Isoform 14 of Calumenin;Isoform of O43852, Isoform 9 of Calumenin;Isoform of O43852, Isoform 11 of Calumenin;Isoform of O43852, Isoform 10 of Calumenin;Isoform of O43852, Isoform 5 of Calumenin;	non matrisome	non matrisome	17924000	0	0	17924000	0	0	0		0	1	2	0	0	0	0	0	3				526	1311;7337	True;True	1389;7866	16722;16723;90349	17895;17896;96224	17895;96224
Q5TDF0;Q9BSD7	Q5TDF0;Q9BSD7	2;2	2;2	2;2	Cancer-related nucleoside-triphosphatase	NTPCR	Isoform of Q9BSD7, Cancer-related nucleoside-triphosphatase;Cancer-related nucleoside-triphosphatase	non matrisome	non matrisome	6556200	0	0	0	6556200	0	0		0	0	0	3	0	0	0	1	4				1107	5856;7822	True;True	6291;8389	73622;73623;96137;96138	78441;78442;102421;102422	78442;102421
E9PLA9;G3V153;Q14444-2;Q14444	E9PLA9;G3V153;Q14444-2;Q14444	1;1;1;1	1;1;1;1	1;1;1;1	Caprin-1	CAPRIN1	Isoform of Q14444, Caprin-1 (Fragment);Isoform of Q14444, Caprin-1;Isoform of Q14444, Isoform 2 of Caprin-1;Caprin-1	non matrisome	non matrisome	0	0	0	0	0	0	0		0	0	0	1	0	0	0	0	1				334	8814	TRUE	9428	108014	114939	114939
Q9NRB3	Q9NRB3	1	1	1	Carbohydrate sulfotransferase 12	CHST12	Carbohydrate sulfotransferase 12	non matrisome	non matrisome	0	0	0	0	0	0	0		0	1	0	0	1	0	0	0	2				1229	2489	TRUE	2637	29940;29941	31996;31997	31997
A0A087WU70;Q8NET6-2;Q8NET6	A0A087WU70;Q8NET6-2;Q8NET6	2;2;2	2;2;2	2;2;2	Carbohydrate sulfotransferase 13	CHST13	Isoform of Q8NET6, Carbohydrate sulfotransferase 13;Isoform of Q8NET6, Isoform 2 of Carbohydrate sulfotransferase 13;Carbohydrate sulfotransferase 13	non matrisome	non matrisome	21518000	0	21518000	0	0	0	0		0	2	0	0	2	0	0	0	4				26	4757;8143	True;True	5047;8722	59920;59921;99843;99844	63985;63986;106331;106332	63985;106331
Q8NCH0;H0YN65	Q8NCH0;H0YN65	14;12	14;12	14;12	Carbohydrate sulfotransferase 14	CHST14	Carbohydrate sulfotransferase 14;Isoform of Q8NCH0, Carbohydrate sulfotransferase 14	non matrisome	non matrisome	1062850000	0	257620000	307910000	152120000	207640000	137560000		1	25	15	19	35	18	5	18	136				1154	284;290;479;776;1525;1526;2490;3514;4423;6699;8089;8683;8684;8773	True;True;True;True;True;True;True;True;True;True;True;True;True;True	300;306;501;815;1611;1612;2638;3737;4702;7193;8667;9291;9292;9383	2547;2548;2549;2550;2551;2552;2553;2554;2555;2648;2649;5150;5151;5152;5153;5154;5155;5156;8478;8479;18890;18891;18892;18893;18894;18895;18896;18897;18898;18899;18900;29942;29943;29944;29945;29946;29947;29948;29949;29950;29951;29952;29953;29954;29955;29956;29957;29958;29959;29960;29961;29962;29963;29964;29965;29966;46114;56565;56566;56567;56568;56569;83182;83183;83184;83185;83186;83187;83188;83189…	2664;2665;2666;2667;2668;2669;2670;2671;2672;2775;2776;5432;5433;5434;5435;5436;5437;5438;8932;8933;20233;20234;20235;20236;20237;20238;20239;20240;20241;20242;20243;31998;31999;32000;32001;32002;32003;32004;32005;32006;32007;32008;32009;32010;32011;32012;32013;32014;32015;32016;32017;32018;32019;32020;32021;32022;32023;49414;60461;60462;60463;60464;60465;88587;88588;88589;88590;88591;88592;88593…	2672;2775;5438;8932;20234;20242;32019;49414;60464;88592;105636;113098;113100;114223
Q9NS84	Q9NS84	3	3	3	Carbohydrate sulfotransferase 7	CHST7	Carbohydrate sulfotransferase 7	non matrisome	non matrisome	19977000	0	19977000	0	0	0	0		0	3	0	0	1	0	0	0	4				1231	2213;2719;4671	True;True;True	2340;2890;4961	26916;32282;59094;59095	28820;34434;63127;63128	28820;34434;63127
E5RJI8;E5RFE7;E5RHP7;P00915;E5RJF6;E5RG81;E5RH81;H0YBE2	E5RJI8;E5RFE7;E5RHP7;P00915;E5RJF6;E5RG81;E5RH81;H0YBE2	3;3;3;3;2;2;2;2	3;3;3;3;2;2;2;2	3;3;3;3;2;2;2;2	Carbonic anhydrase 1	CA1	Isoform of P00915, Carbonic anhydrase 1 (Fragment);Isoform of P00915, Carbonic anhydrase 1 (Fragment);Isoform of P00915, Carbonic anhydrase 1 (Fragment);Carbonic anhydrase 1;Isoform of P00915, Carbonic anhydrase 1 (Fragment);Isoform of P00915, Carbonic anh	non matrisome	non matrisome	11722000	0	0	0	0	11722000	0		0	0	0	1	0	7	2	0	10				283	124;2214;8099	True;True;True	131;2341;8677	1313;26917;26918;26919;26920;99242;99243;99244;99245;99246	1378;28821;28822;28823;28824;105700;105701;105702;105703;105704	1378;28823;105704
Q8N4T0	Q8N4T0	1	1	1	Carboxypeptidase A6	CPA6	Carboxypeptidase A6	non matrisome	non matrisome	117610000	0	0	117610000	0	0	0		0	0	4	0	0	0	0	0	4				1147	811	TRUE	853	9114;9115;9116;9117	9607;9608;9609;9610	9607
A0A087WSY5;Q96IY4;Q96IY4-2;CON__Q2KIG3	A0A087WSY5;Q96IY4;Q96IY4-2	7;7;4;1	7;7;4;1	7;7;4;1	Carboxypeptidase B2	CPB2	Isoform of Q96IY4, Carboxypeptidase B2;Carboxypeptidase B2;Isoform of Q96IY4, Isoform 2 of Carboxypeptidase B2	non matrisome	non matrisome	906580000	0	209530000	204140000	133020000	232830000	127060000		0	14	6	13	25	20	8	13	99				13	774;1630;3669;3832;5426;8802;8836	True;True;True;True;True;True;True	813;1725;3904;4078;5824;9416;9450	8459;8460;8461;8462;8463;8464;8465;8466;8467;8468;8469;8470;8471;8472;8473;8474;8475;20392;20393;20394;20395;20396;20397;20398;20399;20400;20401;20402;20403;20404;20405;20406;20407;20408;20409;20410;20411;20412;20413;20414;20415;20416;20417;20418;20419;20420;20421;20422;20423;20424;20425;20426;20427;20428;20429;20430;20431;20432;20433;48135;48136;48137;50119;50120;50121;50122;50123;50124;50125;50…	8913;8914;8915;8916;8917;8918;8919;8920;8921;8922;8923;8924;8925;8926;8927;8928;8929;21895;21896;21897;21898;21899;21900;21901;21902;21903;21904;21905;21906;21907;21908;21909;21910;21911;21912;21913;21914;21915;21916;21917;21918;21919;21920;21921;21922;21923;21924;21925;21926;21927;21928;21929;21930;21931;21932;21933;21934;21935;21936;51574;51575;51576;53683;53684;53685;53686;53687;53688;53689;53…	8920;21918;51575;53686;72711;114723;115256
P15169	P15169	1	1	1	Carboxypeptidase N catalytic chain	CPN1	Carboxypeptidase N catalytic chain	non matrisome	non matrisome	0	0	0	0	0	0	0		0	0	0	0	3	0	0	0	3				741	4184	TRUE	4452	54144;54145;54146	57933;57934;57935	57933
Q66K79-3;Q66K79-2;Q66K79	Q66K79-3;Q66K79-2;Q66K79	3;3;3	3;3;3	3;3;3	Carboxypeptidase Z	CPZ	Isoform of Q66K79, Isoform 3 of Carboxypeptidase Z;Isoform of Q66K79, Isoform 2 of Carboxypeptidase Z;Carboxypeptidase Z	non matrisome	non matrisome	143583000	0	35117000	72660000	0	19200000	16606000		0	7	6	1	6	4	0	2	26				1112	2217;4747;5307	True;True;True	2344;5037;5656	26925;26926;26927;26928;26929;26930;26931;26932;26933;26934;26935;26936;26937;26938;26939;26940;26941;59859;59860;59861;59862;59863;59864;66705;66706	28829;28830;28831;28832;28833;28834;28835;28836;28837;28838;28839;28840;28841;28842;28843;28844;28845;63922;63923;63924;63925;63926;63927;63928;71092;71093	28829;63925;71092	671	264
A0A0C4DFP6;Q9NQ79-2;Q9NQ79;Q9NQ79-3;Q5T4F6	A0A0C4DFP6;Q9NQ79-2;Q9NQ79;Q9NQ79-3;Q5T4F6	17;17;17;16;13	17;17;17;16;13	17;17;17;16;13	Cartilage acidic protein 1	CRTAC1	Isoform of Q9NQ79, Cartilage acidic protein 1;Isoform of Q9NQ79, Isoform 2 of Cartilage acidic protein 1;Cartilage acidic protein 1;Isoform of Q9NQ79, Isoform 3 of Cartilage acidic protein 1;Isoform of Q9NQ79, Cartilage acidic protein 1 (Fragment)	non matrisome	non matrisome	480042000	0	115230000	0	138460000	146050000	80302000		4	23	1	26	32	32	19	15	152				95	1240;1655;1964;2592;2777;3153;3354;3355;3357;3846;5175;5615;5950;6480;7092;7842;8574	True;True;True;True;True;True;True;True;True;True;True;True;True;True;True;True;True	1312;1750;2076;2748;2950;3355;3568;3569;3571;4092;4093;5496;6038;6390;6959;7599;8411;9179	15963;20825;24260;24261;24262;24263;24264;31102;32905;32906;39617;39618;39619;39620;39621;39622;39623;39624;39625;39626;39627;39628;39629;39630;44023;44024;44025;44026;44027;44028;44029;44030;44031;44032;44033;44034;44035;44036;44037;44038;44039;44040;44041;44042;44043;44044;44045;44046;44058;44059;44060;44061;44062;44063;44064;44065;44066;44067;44068;50302;50303;50304;50305;50306;50307;50308;503…	17110;22342;25988;25989;25990;25991;25992;25993;25994;33205;35110;35111;42383;42384;42385;42386;42387;42388;42389;42390;42391;42392;42393;42394;42395;42396;42397;47122;47123;47124;47125;47126;47127;47128;47129;47130;47131;47132;47133;47134;47135;47136;47137;47138;47139;47140;47141;47142;47143;47144;47145;47157;47158;47159;47160;47161;47162;47163;47164;47165;47166;47167;53870;53871;53872;53873;538…	17110;22342;25990;33205;35111;42390;47125;47141;47167;53873;69233;75562;79354;86039;92831;102611;111775	49	479
O75339	O75339	26	26	26	Cartilage intermediate layer protein 1;Cartilage intermediate layer protein 1 C1;Cartilage intermediate layer protein 1 C2	CILP	Cartilage intermediate layer protein 1	Core matrisome	ECM Glycoproteins	5813192000	52722000	55840000	48639000	1792700000	3823000000	40291000		3	9	4	72	22	87	49	5	251				541	95;953;1078;1090;1559;1822;1922;2009;2349;2479;2480;2506;2537;3328;4170;5166;5167;5924;6239;6977;7219;7243;7347;7385;7644;8068	True;True;True;True;True;True;True;True;True;True;True;True;True;True;True;True;True;True;True;True;True;True;True;True;True;True	100;1006;1142;1155;1156;1648;1930;2032;2128;2483;2627;2628;2655;2689;3541;4438;5487;5488;6363;6705;7480;7739;7740;7765;7877;7917;8197;8645	865;866;867;868;869;870;871;872;873;874;875;876;877;878;879;880;881;882;883;11257;11258;11259;11260;11261;14002;14003;14004;14291;14292;14293;14294;14295;14296;14297;19606;19607;19608;19609;19610;19611;19612;19613;19614;19615;19616;19617;19618;19619;19620;19621;19622;19623;19624;19625;19626;19627;19628;19629;22709;22710;22711;22712;22713;22714;22715;22716;22717;23391;23392;23393;23394;23395;24969…	901;902;903;904;905;906;907;908;909;910;911;912;913;914;915;916;917;918;919;920;921;11897;11898;11899;11900;11901;14929;14930;14931;15254;15255;15256;15257;15258;15259;15260;21062;21063;21064;21065;21066;21067;21068;21069;21070;21071;21072;21073;21074;21075;21076;21077;21078;21079;21080;21081;21082;21083;21084;21085;21086;21087;24327;24328;24329;24330;24331;24332;24333;24334;24335;25053;25054;250…	913;11897;14930;15257;21081;24333;25056;26760;30125;31843;31845;32108;32402;46817;57768;69144;69145;79142;83004;91363;95078;95268;96298;96787;100091;105349	215;216	878;1013
K7EPJ4;Q8IUL8	K7EPJ4;Q8IUL8	27;27	27;27	27;27	Cartilage intermediate layer protein 2;Cartilage intermediate layer protein 2 C1;Cartilage intermediate layer protein 2 C2	CILP2	Isoform of Q8IUL8, Cartilage intermediate layer protein 2;Cartilage intermediate layer protein 2	Core matrisome	ECM Glycoproteins	8065300000	1020400000	0	366050000	431650000	6247200000	0		35	0	10	33	6	126	77	1	288				478	111;952;1089;1513;1792;2107;2147;2352;2633;3230;4017;4691;4692;5879;5923;6560;6579;6580;7168;7278;7523;7524;7605;7803;7804;7940;8667	True;True;True;True;True;True;True;True;True;True;True;True;True;True;True;True;True;True;True;True;True;True;True;True;True;True;True	117;1005;1153;1154;1599;1899;2229;2270;2486;2796;3437;4275;4276;4981;4982;6315;6362;7045;7065;7066;7680;7801;8067;8068;8069;8155;8368;8369;8512;9275	1128;1129;1130;1131;1132;1133;1134;1135;1136;1137;11246;11247;11248;11249;11250;11251;11252;11253;11254;11255;11256;14276;14277;14278;14279;14280;14281;14282;14283;14284;14285;14286;14287;14288;14289;14290;18822;18823;22367;22368;22369;22370;22371;22372;22373;22374;22375;22376;22377;22378;22379;22380;22381;22382;22383;22384;22385;22386;22387;22388;22389;25805;25806;25807;25808;25809;26116;26117;2…	1185;1186;1187;1188;1189;1190;1191;1192;1193;1194;11886;11887;11888;11889;11890;11891;11892;11893;11894;11895;11896;15239;15240;15241;15242;15243;15244;15245;15246;15247;15248;15249;15250;15251;15252;15253;20162;20163;23970;23971;23972;23973;23974;23975;23976;23977;23978;23979;23980;23981;23982;23983;23984;23985;23986;23987;23988;23989;23990;23991;23992;23993;23994;23995;27667;27668;27669;27670;2…	1190;11892;15240;20162;23990;27670;27998;30147;33712;45226;55960;63327;63352;78754;79114;86857;87068;87070;94140;95690;98773;98781;99526;102056;102074;103709;112913	178;179;180	958;1004;1019
G3XAP6;P49747;P49747-2	G3XAP6;P49747;P49747-2	12;12;9	10;10;7	7;7;5	Cartilage oligomeric matrix protein	COMP	Isoform of P49747, Cartilage oligomeric matrix protein;Cartilage oligomeric matrix protein;Isoform of P49747, Isoform 2 of Cartilage oligomeric matrix protein	Core matrisome	ECM Glycoproteins	423661000	0	105270000	0	121670000	141590000	55131000		1	9	3	12	5	11	13	3	57				392	768;924;983;1496;1497;1584;1620;1621;2087;3702;5179;6275	False;True;True;True;True;True;True;True;True;False;True;True	807;974;1037;1582;1583;1674;1715;1716;2209;3937;5500;6746	8404;8405;8406;8407;8408;8409;8410;8411;8412;8413;8414;8415;8416;10563;10564;10565;10566;10567;10568;10569;11901;11902;11903;18689;18690;18691;18692;18693;18694;18695;18696;18697;19911;19912;19913;19914;19915;20315;20316;20317;20318;20319;20320;20321;20322;20323;20324;20325;20326;25619;25620;25621;25622;25623;25624;25625;25626;25627;25628;48334;48335;48336;48337;65011;65012;65013;65014;65015;7858…	8857;8858;8859;8860;8861;8862;8863;8864;8865;8866;8867;8868;8869;11147;11148;11149;11150;11151;11152;11153;11154;12588;12589;12590;20023;20024;20025;20026;20027;20028;20029;20030;20031;20032;21386;21387;21388;21389;21390;21814;21815;21816;21817;21818;21819;21820;21821;21822;21823;21824;21825;21826;21827;27469;27470;27471;27472;27473;27474;27475;27476;27477;27478;51777;51778;51779;51780;69295;6929…	8858;11151;12590;20026;20029;21386;21814;21827;27469;51780;69298;83694
E7EU96;P68400;P68400-2;Q8NEV1	E7EU96;P68400;P68400-2;Q8NEV1	2;2;1;1	2;2;1;1	2;2;1;1	Casein kinase II subunit alpha;Casein kinase II subunit alpha 3	CSNK2A1;CSNK2A3	Isoform of P68400, Casein kinase II subunit alpha;Casein kinase II subunit alpha;Isoform of P68400, Isoform 2 of Casein kinase II subunit alpha;Casein kinase II subunit alpha 3	non matrisome	non matrisome	6344500	0	0	0	6344500	0	0		0	1	0	2	0	0	0	0	3				305	7553;8130	True;True	8103;8709	92978;92979;99765	99049;99050;106252	99050;106252
P31944	P31944	3	3	3	Caspase-14;Caspase-14 subunit p17, mature form;Caspase-14 subunit p10, mature form;Caspase-14 subunit p20, intermediate form;Caspase-14 subunit p8, intermediate form	CASP14	Caspase-14	non matrisome	non matrisome	98089000	35522000	17272000	0	16413000	13813000	15069000		5	3	5	3	2	3	3	4	28				830	3263;4465;6351	True;True;True	3470;4746;6823	42589;56949;56950;56951;56952;56953;56954;56955;56956;56957;56958;56959;56960;56961;56962;56963;56964;56965;56966;56967;79491;79492;79493;79494;79495;79496;79497;79498;79499	45582;60858;60859;60860;60861;60862;60863;60864;60865;60866;60867;60868;60869;60870;60871;60872;60873;60874;60875;60876;84653;84654;84655;84656;84657;84658;84659;84660;84661	45582;60870;84658
P04040	P04040	1	1	1	Catalase	CAT	Catalase	non matrisome	non matrisome	2657000	0	0	0	0	2657000	0		0	0	0	0	0	1	0	0	1				627	5040	TRUE	5356	63663	67905	67905
B4DGU4;P35222	B4DGU4;P35222	3;3	2;2	2;2	Catenin beta-1	CTNNB1	Isoform of P35222, Catenin beta-1;Catenin beta-1	non matrisome	non matrisome	0	0	0	0	0	0	0		0	0	0	2	0	0	0	0	2				173	3450;4738;7744	True;True;False	3669;5028;8305	45218;59801;95222;95223;95224;95225;95226;95227;95228	48427;63864;101445;101446;101447;101448;101449;101450;101451	48427;63864;101451
C9JZR2;O60716-16;O60716-15;O60716-13;O60716-11;O60716-14;O60716-12;O60716-10;O60716-8;O60716-9;O60716-7;O60716-5;O60716-3;O60716-6;O60716-4;O60716-2;O60716;O60716-32;O60716-31;O60716-29;O60716-27;O60716-30;O60716-28;O60716-26;O60716-25;O60716-24;O60716-23;O60716-21;O60716-19;O60716-22;O60716-20;O60716-18;O60716-17;E9PKL1	C9JZR2;O60716-16;O60716-15;O60716-13;O60716-11;O60716-14;O60716-12;O60716-10;O60716-8;O60716-9;O60716-7;O60716-5;O60716-3;O60716-6;O60716-4;O60716-2;O60716;O60716-32;O60716-31;O60716-29;O60716-27;O60716-30;O60716-28;O60716-26;O60716-25;O60716-24;O60716-23;O60716-21;O60716-19;O60716-22;O60716-20;O60716-18;O60716-17	3;3;3;3;3;3;3;3;3;3;3;3;3;3;3;3;3;2;2;2;2;2;2;2;2;2;2;2;2;2;2;2;2;1	3;3;3;3;3;3;3;3;3;3;3;3;3;3;3;3;3;2;2;2;2;2;2;2;2;2;2;2;2;2;2;2;2;1	3;3;3;3;3;3;3;3;3;3;3;3;3;3;3;3;3;2;2;2;2;2;2;2;2;2;2;2;2;2;2;2;2;1	Catenin delta-1	CTNND1	Isoform of O60716, Catenin delta-1;Isoform of O60716, Isoform 2 of Catenin delta-1;Isoform of O60716, Isoform 2C of Catenin delta-1;Isoform of O60716, Isoform 2A of Catenin delta-1;Isoform of O60716, Isoform 2AC of Catenin delta-1;Isoform of O60716, Isofor	non matrisome	non matrisome	18330000	0	0	0	18330000	0	0		0	0	0	2	0	0	0	0	2				230	10;2654;3420	True;True;True	11;2819;3639	90;31770;44793	92;33902;47975	92;33902;47975
P08311	P08311	5	5	5	Cathepsin G	CTSG	Cathepsin G	Matrisome-associated	ECM Regulators	90496000	0	0	0	0	0	90496000		0	0	0	0	9	3	2	4	18				679	605;3764;5715;7446;8371	True;True;True;True;True	639;4002;6144;7979;8963	6588;6589;6590;6591;49206;71883;71884;71885;71886;71887;71888;71889;91617;91618;91619;102410;102411;102412;102413	6956;6957;6958;6959;52725;76592;76593;76594;76595;76596;76597;76598;76599;97625;97626;97627;109070;109071;109072;109073	6958;52725;76599;97626;109072	323	110
E9PCT5;Q03135;C9JKI3;Q03135-2;P56539	E9PCT5;Q03135;C9JKI3;Q03135-2	6;6;5;5;1	6;6;5;5;1	6;6;5;5;1	Caveolin;Caveolin-1	CAV1	Isoform of Q03135, Caveolin;Caveolin-1;Isoform of Q03135, Caveolin (Fragment);Isoform of Q03135, Isoform 2 of Caveolin-1	non matrisome	non matrisome	262615000	99164000	94044000	0	0	69407000	0		3	9	3	1	6	7	0	2	31				314	540;674;1976;3529;6764;8550	True;True;True;True;True;True	566;712;2092;3752;7258;9155	5708;7335;7336;7337;7338;7339;7340;7341;7342;7343;7344;7345;7346;24450;24451;46227;46228;46229;46230;83602;83603;83604;83605;83606;83607;83608;83609;83610;104726;104727;104728	6006;7724;7725;7726;7727;7728;7729;7730;7731;7732;7733;7734;7735;7736;26190;26191;49529;49530;49531;49532;89031;89032;89033;89034;89035;89036;89037;89038;89039;111479;111480;111481	6006;7730;26190;49531;89039;111480
E9PCT3;P51636-2;P51636	E9PCT3;P51636-2;P51636	1;1;1	1;1;1	1;1;1	Caveolin;Caveolin-2	CAV2	Isoform of P51636, Caveolin;Isoform of P51636, Isoform Beta of Caveolin-2;Caveolin-2	non matrisome	non matrisome	4997400	0	0	0	0	4997400	0		0	2	1	1	1	1	0	0	6				313	4543	TRUE	4828	57710;57711;57712;57713;57714;57715	61680;61681;61682;61683;61684;61685	61681
Q5VZ75;Q99731	Q5VZ75;Q99731	3;3	3;3	3;3	C-C motif chemokine;C-C motif chemokine 19	CCL19	Isoform of Q99731, C-C motif chemokine;C-C motif chemokine 19	Matrisome-associated	Secreted Factors	0	0	0	0	0	0	0		0	0	0	0	4	0	0	0	4				1109	5479;5844;6149	True;True;True	5889;6279;6610	68809;68810;68811;73474;73475;76776;76777	73366;73367;73368;78283;78284;81797;81798	73366;78283;81798
E9PNW4;E9PR17;P13987;H0YET2	E9PNW4;E9PR17;P13987	3;3;3;1	3;3;3;1	3;3;3;1	CD59 glycoprotein	CD59	Isoform of P13987, CD59 glycoprotein;Isoform of P13987, CD59 glycoprotein;CD59 glycoprotein	non matrisome	non matrisome	99246000	0	54746000	0	0	0	44500000		2	7	1	1	3	2	1	5	22				341	315;2401;4960	True;True;True	332;2539;5274	2949;2950;2951;2952;2953;2954;2955;2956;28853;28854;28855;28856;28857;28858;28859;28860;28861;28862;28863;62627;62628;62629	3089;3090;3091;3092;3093;3094;3095;3096;3097;3098;30828;30829;30830;30831;30832;30833;30834;30835;30836;30837;30838;66814;66815;66816	3091;30836;66815
P60953;Q5JYX0;P60953-1	P60953;Q5JYX0;P60953-1	3;2;2	2;1;1	2;1;1	Cell division control protein 42 homolog	CDC42	Cell division control protein 42 homolog;Isoform of P60953, Cell division control protein 42 homolog (Fragment);Isoform of P60953, Isoform 1 of Cell division control protein 42 homolog	non matrisome	non matrisome	7778900	0	7778900	0	0	0	0		0	2	0	1	1	0	0	0	4				931	1144;5707;7248	False;True;True	1213;6135;7770	14944;14945;14946;14947;14948;14949;14950;14951;14952;14953;14954;14955;14956;71836;71837;71838;89506	16019;16020;16021;16022;16023;16024;16025;16026;16027;16028;16029;16030;16031;16032;16033;76545;76546;76547;95318	16031;76547;95318
Q99459	Q99459	2	2	2	Cell division cycle 5-like protein	CDC5L	Cell division cycle 5-like protein	non matrisome	non matrisome	2831000	0	2831000	0	0	0	0		0	1	2	0	0	0	0	0	3				1191	601;7996	True;True	635;8568	6552;98090;98091	6919;104480;104481	6919;104481
E9PFZ2;P00450;H7C5R1;D6RE86;CON__ENSEMBL:ENSBTAP00000031900;H7C5N5	E9PFZ2;P00450;H7C5R1	7;7;4;2;2;1	7;7;4;2;2;1	7;7;4;2;2;1	Ceruloplasmin	CP	Isoform of P00450, Ceruloplasmin;Ceruloplasmin;Isoform of P00450, Ceruloplasmin (Fragment)	non matrisome	non matrisome	47568000	0	0	0	0	0	47568000		0	0	0	0	1	1	0	9	11				318	539;1218;1366;1382;2279;5308;5971	True;True;True;True;True;True;True	565;1290;1445;1461;2410;5657;6412	5706;5707;15756;15757;15758;17242;17243;17434;27459;27460;66707;74601	6004;6005;16879;16880;16881;18437;18438;18653;29380;29381;71094;79472	6005;16879;18437;18653;29381;71094;79472
P51800-2;P51800-3;P51800	P51800-2;P51800-3;P51800	1;1;1	1;1;1	1;1;1	Chloride channel protein ClC-Ka	CLCNKA	Isoform of P51800, Isoform 2 of Chloride channel protein ClC-Ka;Isoform of P51800, Isoform 3 of Chloride channel protein ClC-Ka;Chloride channel protein ClC-Ka	non matrisome	non matrisome	0	0	0	0	0	0	0		0	0	0	0	0	0	0	1	1				902	398	TRUE	417	4098	4322	4322
O00299	O00299	3	3	3	Chloride intracellular channel protein 1	CLIC1	Chloride intracellular channel protein 1	non matrisome	non matrisome	3898200	0	0	0	3898200	0	0		0	0	0	3	1	0	0	0	4				493	3809;4282;5679	True;True;True	4050;4555;6105	49629;54985;71613	53169;58814;76299;76300	53169;58814;76300
Q9Y696	Q9Y696	2	2	2	Chloride intracellular channel protein 4	CLIC4	Chloride intracellular channel protein 4	non matrisome	non matrisome	0	0	0	0	0	0	0		0	1	0	2	2	1	0	0	6				1278	328;2268	True;True	346;2398	3076;3077;3078;3079;27418;27419	3228;3229;3230;3231;29339;29340	3228;29339
O15335	O15335	2	2	2	Chondroadherin	CHAD	Chondroadherin	Core matrisome	Proteoglycans	8959300	0	0	0	0	8959300	0		0	0	0	0	0	2	1	0	3				514	2257;2578	True;True	2386;2733	27354;30966;30967	29273;33058;33059	29273;33059
E7ESX1;Q9H2X0-5;Q9H2X0	E7ESX1;Q9H2X0-5;Q9H2X0	3;3;3	3;3;3	3;3;3	Chordin	CHRD	Isoform of Q9H2X0, Chordin;Isoform of Q9H2X0, Isoform 5 of Chordin;Chordin	Matrisome-associated	Secreted Factors	0	0	0	0	0	0	0		0	0	0	0	3	0	1	0	4				302	1521;4288;6798	True;True;True	1607;4561;7293	18864;55064;83865;83866	20207;58895;89331;89332	20207;58895;89332
Q9BU40-2;Q9BU40-5;Q9BU40-4;Q9BU40-3;Q9BU40;Q9BU40-6	Q9BU40-2;Q9BU40-5;Q9BU40-4;Q9BU40-3;Q9BU40;Q9BU40-6	12;12;12;11;11;11	12;12;12;11;11;11	12;12;12;11;11;11	Chordin-like protein 1	CHRDL1	Isoform of Q9BU40, Isoform 2 of Chordin-like protein 1;Isoform of Q9BU40, Isoform 5 of Chordin-like protein 1;Isoform of Q9BU40, Isoform 4 of Chordin-like protein 1;Isoform of Q9BU40, Isoform 3 of Chordin-like protein 1;Chordin-like protein 1;Isoform of Q9	Matrisome-associated	Secreted Factors	465359000	0	104950000	0	115410000	167400000	77599000		2	12	1	17	30	19	6	7	94				1199	1852;3011;3642;3774;3828;5065;5301;6487;7311;7657;7740;7819	True;True;True;True;True;True;True;True;True;True;True;True	1961;3204;3877;4012;4013;4074;5382;5648;6967;7838;8213;8301;8385	22873;22874;22875;22876;37855;37856;37857;37858;37859;37860;37861;37862;37863;37864;37865;37866;37867;37868;37869;37870;37871;47814;47815;47816;49290;49291;49292;49293;49294;49295;49296;49297;49298;49299;49300;49301;49302;49303;49304;49305;49306;49307;49308;49309;49310;49311;49312;49313;49314;49315;49316;49317;49318;49319;49320;49321;49322;49323;49324;49325;49326;49327;50081;63849;66610;66611;808…	24493;24494;24495;24496;40522;40523;40524;40525;40526;40527;40528;40529;40530;40531;40532;40533;40534;40535;40536;40537;40538;51233;51234;51235;52809;52810;52811;52812;52813;52814;52815;52816;52817;52818;52819;52820;52821;52822;52823;52824;52825;52826;52827;52828;52829;52830;52831;52832;52833;52834;52835;52836;52837;52838;52839;52840;52841;52842;52843;52844;52845;52846;52847;53643;68094;70996;709…	24495;40523;51235;52847;53643;68094;70997;86078;95955;100197;101433;102367	711;712	394;425
H0YDT1;A0A087WZH6;Q6WN34;Q6WN34-2;Q6WN33	H0YDT1;A0A087WZH6;Q6WN34;Q6WN34-2;Q6WN33	3;3;3;3;2	3;3;3;3;2	3;3;3;3;2	Chordin-like protein 2	CHRDL2;CHL2	Isoform of Q6WN34, Chordin-like protein 2 (Fragment);Isoform of Q6WN34, Chordin-like protein 2;Chordin-like protein 2;Isoform of Q6WN34, Isoform 2 of Chordin-like protein 2;Isoform of Q6WN34, Chordin-like protein 2 (Fragment)	Matrisome-associated	Secreted Factors	0	0	0	0	0	0	0		0	0	0	3	3	0	0	0	6				45	144;254;8192	True;True;True	154;268;8776	1506;2288;2289;100232;100233;100234	1581;2388;2389;106724;106725;106726	1581;2388;106725
Q13185;C9JMM0;B8ZZ43;S4R2Y4;K7ELA4;B5MD17;J3KS05;P83916	Q13185	3;1;1;1;1;1;1;1	3;1;1;1;1;1;1;1	3;1;1;1;1;1;1;1	Chromobox protein homolog 3	CBX3	Chromobox protein homolog 3	non matrisome	non matrisome	48791000	0	28020000	0	20771000	0	0		0	4	2	2	0	0	0	0	8				1043	1583;3855;4264	True;True;True	1673;4102;4537	19908;19909;19910;50392;54854;54855;54856	21383;21384;21385;53960;58665;58666;58667;58668	21384;53960;58665
P23946;P23946-2	P23946;P23946-2	5;3	5;3	5;3	Chymase	CMA1	Chymase;Isoform of P23946, Isoform 2 of Chymase	non matrisome	non matrisome	194510000	44367000	48773000	45034000	0	0	56336000		2	5	3	0	4	2	3	10	29				786	2367;4785;5487;5823;6679	True;True;True;True;True	2502;5079;5897;6258;7171	28387;28388;28389;28390;28391;28392;28393;28394;28395;28396;28397;60574;68884;68885;68886;68887;68888;73279;73280;73281;73282;73283;73284;73285;73286;83047;83048;83049;83050	30328;30329;30330;30331;30332;30333;30334;30335;30336;30337;30338;64662;73443;73444;73445;73446;73447;78077;78078;78079;78080;78081;78082;78083;78084;88444;88445;88446;88447	30338;64662;73445;78082;88447
Q9Y6A4;H3BPA3	Q9Y6A4	4;1	4;1	4;1	Cilia- and flagella-associated protein 20	CFAP20	Cilia- and flagella-associated protein 20	non matrisome	non matrisome	44591000	0	23873000	0	20718000	0	0		0	3	0	2	7	2	1	0	15				1279	858;4849;5243;6329	True;True;True;True	903;5150;5566;6801	9530;9531;9532;9533;9534;9535;9536;9537;61198;61199;61200;61201;61202;65852;65853;79220	10042;10043;10044;10045;10046;10047;10048;10049;65307;65308;65309;65310;65311;70189;70190;84365	10045;65311;70189;84365	742	78
A0A0C4DFU9;Q5TA04;Q8NDM7-4;Q8NDM7-3;Q8NDM7-2;Q8NDM7	A0A0C4DFU9;Q5TA04;Q8NDM7-4;Q8NDM7-3;Q8NDM7-2;Q8NDM7	1;1;1;1;1;1	1;1;1;1;1;1	1;1;1;1;1;1	Cilia- and flagella-associated protein 43	CFAP43	Isoform of Q8NDM7, Cilia- and flagella-associated protein 43;Isoform of Q8NDM7, Cilia- and flagella-associated protein 43;Isoform of Q8NDM7, Isoform 4 of Cilia- and flagella-associated protein 43;Isoform of Q8NDM7, Isoform 3 of Cilia- and flagella-associat	non matrisome	non matrisome	3532900	0	3532900	0	0	0	0		0	1	0	0	0	0	0	0	1				97	2153	TRUE	2276	26312	28199	28199
B4DJV2;O75390;A0A0C4DGI3;H0YIC4;F8W0J2;F8VP03;F8VWQ5;F8VU34;F8VR34;F8VTT8;F8W4S1;F8W031	B4DJV2;O75390;A0A0C4DGI3;H0YIC4	5;5;4;3;1;1;1;1;1;1;1;1	5;5;4;3;1;1;1;1;1;1;1;1	5;5;4;3;1;1;1;1;1;1;1;1	Citrate synthase;Citrate synthase, mitochondrial	CS	Isoform of O75390, Citrate synthase;Citrate synthase, mitochondrial;Isoform of O75390, Citrate synthase;Isoform of O75390, Citrate synthase (Fragment)	non matrisome	non matrisome	53401000	0	18627000	0	34774000	0	0		0	7	0	9	0	0	0	0	16				175	463;1387;4182;5119;8500	True;True;True;True;True	485;1466;4450;5440;9104	4998;4999;17479;54132;54133;54134;54135;54136;54137;54138;54139;64378;64379;64380;104244;104245	5270;5271;18699;57921;57922;57923;57924;57925;57926;57927;57928;68631;68632;68633;110981;110982	5270;18699;57926;68632;110981
A0A087WVQ6;Q00610-2;Q00610;A0A087WX41;P53675-2;P53675;J3KS13;J3KSQ2;J3KRF5;F5H5N6;K7EJJ5	A0A087WVQ6;Q00610-2;Q00610	16;16;16;6;6;6;3;1;1;1;1	16;16;16;6;6;6;3;1;1;1;1	16;16;16;6;6;6;3;1;1;1;1	Clathrin heavy chain;Clathrin heavy chain 1	CLTC	Isoform of Q00610, Clathrin heavy chain;Isoform of Q00610, Isoform 2 of Clathrin heavy chain 1;Clathrin heavy chain 1	non matrisome	non matrisome	130040000	0	24378000	0	72290000	18718000	14654000		2	8	0	20	1	4	0	4	39				34	446;3629;4173;4211;4430;4597;4729;5565;5579;5609;7503;7775;8070;8474;8590;8724	True;True;True;True;True;True;True;True;True;True;True;True;True;True;True;True	468;3864;4441;4480;4709;4885;5019;5978;5994;6032;8046;8339;8647;9075;9195;9333	4807;4808;4809;4810;4811;4812;4813;4814;4815;47690;54018;54416;56592;58366;59743;59744;59745;59746;59747;70131;70132;70133;70398;70820;70821;92572;92573;92574;92575;92576;95498;98912;103828;105176;105177;105178;105179;105180;105181;106778	5066;5067;5068;5069;5070;5071;5072;5073;5074;51106;57797;58215;60489;62368;63805;63806;63807;63808;63809;74762;74763;74764;75032;75471;75472;98631;98632;98633;98634;98635;101729;105355;110549;111938;111939;111940;111941;111942;111943;113640	5071;51106;57797;58215;60489;62368;63809;74763;75032;75472;98633;101729;105355;110549;111940;113640
Q14677-2;Q14677;Q14677-3	Q14677-2;Q14677;Q14677-3	1;1;1	1;1;1	1;1;1	Clathrin interactor 1	CLINT1	Isoform of Q14677, Isoform 2 of Clathrin interactor 1;Clathrin interactor 1;Isoform of Q14677, Isoform 3 of Clathrin interactor 1	non matrisome	non matrisome	3489900	0	0	0	3489900	0	0		0	0	0	1	0	0	0	0	1				1063	2099	TRUE	2221	25758	27620	27620
P10909-4;P10909;P10909-5;P10909-2;P10909-3;H0YC35;H0YLK8;H0YAS8;E7ETB4;E5RJZ5;E5RG36;E5RGB0;E5RH61	P10909-4;P10909;P10909-5;P10909-2;P10909-3;H0YC35;H0YLK8	18;18;18;18;13;12;10;6;6;3;2;2;2	18;18;18;18;13;12;10;6;6;3;2;2;2	11;11;11;11;11;8;3;6;1;0;0;0;0	Clusterin;Clusterin beta chain;Clusterin alpha chain;Clusterin	CLU	Isoform of P10909, Isoform 4 of Clusterin;Clusterin;Isoform of P10909, Isoform 5 of Clusterin;Isoform of P10909, Isoform 2 of Clusterin;Isoform of P10909, Isoform 3 of Clusterin;Isoform of P10909, Clusterin (Fragment);Isoform of P10909, Clusterin (Fragment	non matrisome	non matrisome	24277700000	1956300000	5904500000	5222100000	3351300000	4248800000	3594700000		30	91	57	68	93	76	39	71	525				700	705;706;1073;1909;1996;2011;2039;2149;2428;2520;3697;4497;4498;6228;6359;7488;7818;8444	True;True;True;True;True;True;True;True;True;True;True;True;True;True;True;True;True;True	743;744;1137;2019;2112;2130;2160;2272;2570;2671;2672;3932;4781;4782;6692;6693;6694;6831;8024;8384;9042	7665;7666;7667;7668;7669;7670;7671;7672;7673;7674;7675;7676;7677;7678;7679;7680;7681;7682;7683;7684;7685;7686;7687;7688;7689;7690;7691;7692;7693;7694;7695;7696;7697;7698;7699;7700;7701;7702;7703;7704;7705;7706;7707;7708;7709;7710;7711;7712;7713;7714;7715;7716;7717;7718;7719;7720;7721;7722;7723;7724;7725;7726;7727;7728;7729;7730;7731;7732;7733;7734;7735;7736;7737;7738;7739;7740;7741;7742;7743;7744…	8089;8090;8091;8092;8093;8094;8095;8096;8097;8098;8099;8100;8101;8102;8103;8104;8105;8106;8107;8108;8109;8110;8111;8112;8113;8114;8115;8116;8117;8118;8119;8120;8121;8122;8123;8124;8125;8126;8127;8128;8129;8130;8131;8132;8133;8134;8135;8136;8137;8138;8139;8140;8141;8142;8143;8144;8145;8146;8147;8148;8149;8150;8151;8152;8153;8154;8155;8156;8157;8158;8159;8160;8161;8162;8163;8164;8165;8166;8167;8168…	8099;8235;14844;24922;26398;26763;27119;28078;31242;32212;51718;61290;61369;82940;84843;98088;102355;109903	143;144;343	139;143;398
P00740-2;P00740	P00740-2;P00740	7;7	7;7	7;7	Coagulation factor IX;Coagulation factor IXa light chain;Coagulation factor IXa heavy chain	F9	Isoform of P00740, Isoform 2 of Coagulation factor IX;Coagulation factor IX	Matrisome-associated	ECM Regulators	421042000	0	135480000	96913000	0	115900000	72749000		3	8	5	6	16	11	3	7	59				577	2329;2452;2629;4148;6633;7823;8588	True;True;True;True;True;True;True	2463;2599;2791;4415;7121;8390;9193	27971;27972;27973;29501;29502;29503;29504;29505;29506;29507;29508;29509;29510;29511;29512;31532;53777;53778;53779;82551;82552;82553;82554;82555;82556;82557;82558;82559;82560;82561;82562;82563;82564;82565;82566;82567;82568;82569;82570;82571;82572;82573;82574;82575;82576;82577;82578;96139;96140;96141;96142;96143;96144;96145;96146;96147;105171;105172;105173;105174	29899;29900;29901;31546;31547;31548;31549;31550;31551;31552;31553;31554;31555;31556;31557;33659;57539;57540;57541;87889;87890;87891;87892;87893;87894;87895;87896;87897;87898;87899;87900;87901;87902;87903;87904;87905;87906;87907;87908;87909;87910;87911;87912;87913;87914;87915;87916;102423;102424;102425;102426;102427;102428;102429;102430;102431;111933;111934;111935;111936	29900;31556;33659;57541;87897;102430;111935
P00488;Q9NQP5;A6PVK5	P00488	3;1;1	3;1;1	3;1;1	Coagulation factor XIII A chain	F13A1	Coagulation factor XIII A chain	Matrisome-associated	ECM Regulators	11947000	0	0	0	0	11947000	0		0	0	0	0	0	3	0	0	3				572	1343;3349;5019	True;True;True	1421;3563;5333	17036;43989;63497	18223;47088;67737	18223;47088;67737
P05160	P05160	2	2	2	Coagulation factor XIII B chain	F13B	Coagulation factor XIII B chain	Matrisome-associated	ECM Regulators	2921100	0	0	0	0	2921100	0		0	0	0	0	0	2	0	0	2				647	6823;8134	True;True	7320;8713	84269;99776	89777;106264	89777;106264
P53621;P53621-2	P53621;P53621-2	2;2	2;2	2;2	Coatomer subunit alpha;Xenin;Proxenin	COPA	Coatomer subunit alpha;Isoform of P53621, Isoform 2 of Coatomer subunit alpha	non matrisome	non matrisome	3783700	0	0	0	3783700	0	0		0	1	0	2	0	0	0	0	3				914	5142;7466	True;True	5463;8002	64601;64602;91803	68872;68873;97822	68873;97822
B0YIW6;P48444;Q6P1Q5;P48444-2	B0YIW6;P48444;Q6P1Q5;P48444-2	2;2;1;1	2;2;1;1	2;2;1;1	Coatomer subunit delta	ARCN1	Isoform of P48444, Archain 1, isoform CRA_a;Coatomer subunit delta;Isoform of P48444, ARCN1 protein;Isoform of P48444, Isoform 2 of Coatomer subunit delta	non matrisome	non matrisome	5039400	0	0	0	5039400	0	0		0	0	0	2	0	0	0	0	2				161	4520;5677	True;True	4805;6103	57567;71606	61520;76292	61520;76292
Q9UBF2-2;Q9UBF2;Q9Y678	Q9UBF2-2;Q9UBF2;Q9Y678	1;1;1	1;1;1	1;1;1	Coatomer subunit gamma-2;Coatomer subunit gamma-1	COPG2;COPG1	Isoform of Q9UBF2, Isoform 2 of Coatomer subunit gamma-2;Coatomer subunit gamma-2;Coatomer subunit gamma-1	non matrisome	non matrisome	8234300	0	0	0	8234300	0	0		0	0	0	1	0	0	0	0	1				1243	6837	TRUE	7335	84421	89942	89942
P23528;G3V1A4;E9PP50;E9PK25;E9PLJ3;E9PS23;E9PQB7;Q9Y281-3;Q9Y281	P23528;G3V1A4;E9PP50;E9PK25;E9PLJ3;E9PS23;E9PQB7	7;6;6;6;4;4;4;1;1	7;6;6;6;4;4;4;1;1	7;6;6;6;4;4;4;1;1	Cofilin-1	CFL1	Cofilin-1;Isoform of P23528, Cofilin 1 (Non-muscle), isoform CRA_a;Isoform of P23528, Cofilin-1 (Fragment);Isoform of P23528, Cofilin-1;Isoform of P23528, Cofilin-1 (Fragment);Isoform of P23528, Cofilin-1 (Fragment);Isoform of P23528, Cofilin-1 (Fragment)	non matrisome	non matrisome	354347000	0	74986000	84551000	111390000	38785000	44635000		1	10	6	15	8	8	5	6	59				784	680;803;1997;3469;4548;5523;8625	True;True;True;True;True;True;True	718;843;2113;3688;4833;5935;9230	7415;7416;7417;7418;7419;7420;7421;7422;7423;7424;7425;7426;7427;7428;8871;8872;8873;8874;8875;8876;8877;8878;8879;8880;8881;8882;8883;8884;8885;8886;8887;8888;8889;8890;8891;8892;8893;24641;24642;24643;45490;45491;45492;57790;57791;57792;57793;57794;57795;57796;69506;69507;69508;105592;105593;105594;105595;105596;105597;105598	7813;7814;7815;7816;7817;7818;7819;7820;7821;7822;7823;7824;7825;7826;9356;9357;9358;9359;9360;9361;9362;9363;9364;9365;9366;9367;9368;9369;9370;9371;9372;9373;9374;9375;9376;9377;9378;26400;26401;26402;48712;48713;48714;61760;61761;61762;61763;61764;61765;61766;74114;74115;74116;74117;112367;112368;112369;112370;112371;112372;112373	7815;9366;26401;48714;61760;74115;112369
Q9BQI4	Q9BQI4	1	1	1	Coiled-coil domain-containing protein 3	CCDC3	Coiled-coil domain-containing protein 3	non matrisome	non matrisome	0	0	0	0	0	0	0		0	0	0	0	1	0	0	0	1				1198	204	TRUE	216	1828	1914	1914
Q16204	Q16204	1	1	1	Coiled-coil domain-containing protein 6	CCDC6	Coiled-coil domain-containing protein 6	non matrisome	non matrisome	0	0	0	0	0	0	0		0	0	0	1	0	0	0	0	1				1091	223	TRUE	237	1957	2045	2045
Q8IWA6	Q8IWA6	1	1	1	Coiled-coil domain-containing protein 60	CCDC60	Coiled-coil domain-containing protein 60	non matrisome	non matrisome	31788000	0	0	0	0	0	31788000		0	0	0	0	1	0	0	1	2				1140	6576	TRUE	7062	81765;81766	87049;87050	87049	683	317
K7ENX8;K7ELV6;K7EJV5;K7ELT6;K7EJV1;K7EMY9;K7EPM4;K7ER40;K7EQR7;D6W5Y5;Q14011;Q14011-2	K7ENX8;K7ELV6;K7EJV5;K7ELT6;K7EJV1;K7EMY9;K7EPM4;K7ER40;K7EQR7;D6W5Y5;Q14011;Q14011-2	2;2;2;2;2;2;2;2;2;2;2;2	2;2;2;2;2;2;2;2;2;2;2;2	2;2;2;2;2;2;2;2;2;2;2;2	Cold-inducible RNA-binding protein	CIRBP	Isoform of Q14011, Cold-inducible RNA-binding protein (Fragment);Isoform of Q14011, Cold-inducible RNA-binding protein (Fragment);Isoform of Q14011, Cold-inducible RNA-binding protein (Fragment);Isoform of Q14011, Cold-inducible RNA-binding protein;Isoform	non matrisome	non matrisome	11798000	0	0	0	11798000	0	0		0	0	0	2	0	0	0	0	2				281	2898;8701	True;True	3087;9309	35834;106469	38296;113306	38296;113306
P02452;I3L3H7	P02452	36;5	36;5	34;4	Collagen alpha-1(I) chain	COL1A1	Collagen alpha-1(I) chain	Core matrisome	Collagens	648942000000	138880000000	93650000000	145190000000	76078000000	95397000000	99747000000		224	579	361	485	349	453	553	539	3543				601	1301;1324;1700;1907;2756;2757;2812;2845;2847;2856;2864;2913;2914;2921;2922;3108;3109;3163;3164;3195;3208;3220;3255;3268;3291;3382;3385;3398;3399;3675;5442;6101;6102;7115;8097;8708	True;True;True;True;True;True;True;True;True;True;True;True;True;True;True;True;True;True;True;True;True;True;True;True;True;True;True;True;True;True;True;True;True;True;True;True	1378;1402;1801;2017;2929;2930;2990;3026;3028;3040;3050;3104;3105;3112;3113;3303;3304;3366;3367;3400;3401;3414;3426;3427;3462;3475;3500;3599;3603;3616;3617;3910;5844;6557;6558;6559;7623;7624;8675;9317	16569;16570;16571;16572;16573;16574;16575;16576;16577;16578;16579;16580;16581;16582;16583;16584;16585;16586;16587;16588;16589;16590;16907;16908;16909;16910;16911;16912;16913;16914;16915;16916;16917;16918;16919;16920;16921;16922;16923;16924;16925;16926;16927;16928;16929;16930;16931;16932;21374;21375;21376;21377;21378;21379;21380;21381;21382;21383;21384;21385;21386;21387;21388;21389;21390;21391;213…	17738;17739;17740;17741;17742;17743;17744;17745;17746;17747;17748;17749;17750;17751;17752;17753;17754;17755;17756;17757;17758;17759;17760;17761;17762;18085;18086;18087;18088;18089;18090;18091;18092;18093;18094;18095;18096;18097;18098;18099;18100;18101;18102;18103;18104;18105;18106;18107;18108;18109;18110;22912;22913;22914;22915;22916;22917;22918;22919;22920;22921;22922;22923;22924;22925;22926;229…	17742;18096;22928;24919;34964;34997;35878;36595;36613;36962;37749;38713;38715;39231;39274;41734;41736;43138;43307;44023;44312;44759;45536;45687;46237;47471;47534;47719;47740;51610;73010;80958;81022;93244;105675;113470	239;240;241;242	181;301;580;1000
P02458;P02458-1	P02458;P02458-1	4;3	1;1	1;1	Collagen alpha-1(II) chain;Collagen alpha-1(II) chain;Chondrocalcin	COL2A1	Collagen alpha-1(II) chain;Isoform of P02458, Isoform 1 of Collagen alpha-1(II) chain	Core matrisome	Collagens	0	0	0	0	0	0	0		0	1	0	0	0	0	0	0	1	+			602	1700;2914;3019;3231	False;False;True;False	1801;3105;3212;3438	21374;21375;21376;21377;21378;21379;21380;21381;21382;21383;21384;21385;21386;21387;21388;21389;21390;21391;21392;21393;21394;21395;21396;21397;21398;21399;36187;36188;36189;36190;36191;36192;36193;36194;36195;36196;36197;36198;36199;36200;37914;42249;42250;42251;42252;42253;42254;42255;42256;42257;42258;42259;42260;42261;42262;42263;42264;42265;42266;42267;42268;42269;42270;42271;42272;42273;422…	22912;22913;22914;22915;22916;22917;22918;22919;22920;22921;22922;22923;22924;22925;22926;22927;22928;22929;22930;22931;22932;22933;22934;22935;22936;22937;38714;38715;38716;38717;38718;38719;38720;38721;38722;38723;38724;38725;38726;38727;40583;45230;45231;45232;45233;45234;45235;45236;45237;45238;45239;45240;45241;45242;45243;45244;45245;45246;45247;45248;45249;45250;45251;45252;45253;45254;452…	22928;38715;40583;45258	111	602
P02461;P02461-2;H7C435	P02461;P02461-2	14;10;1	14;10;1	10;8;1	Collagen alpha-1(III) chain	COL3A1	Collagen alpha-1(III) chain;Isoform of P02461, Isoform 2 of Collagen alpha-1(III) chain	Core matrisome	Collagens	74384200000	12160000000	13321000000	20407000000	6386200000	8516000000	13594000000		22	80	46	33	47	33	67	82	410				603	1327;1350;2642;2692;2837;2840;2843;2855;2966;3215;3231;5491;5797;5819	True;True;True;True;True;True;True;True;True;True;True;True;True;True	1405;1428;1429;2806;2862;2863;3017;3021;3024;3039;3159;3421;3438;5901;6231;6254	16953;16954;16955;17103;17104;17105;17106;17107;17108;17109;17110;17111;17112;17113;17114;17115;17116;17117;17118;17119;17120;31673;32071;32072;32073;32074;34210;34211;34212;34213;34214;34227;34228;34229;34230;34231;34232;34233;34234;34235;34236;34237;34238;34239;34240;34241;34242;34243;34244;34245;34246;34247;34248;34249;34250;34251;34256;34257;34258;34259;34260;34261;34262;34263;34264;34265;342…	18131;18132;18133;18294;18295;18296;18297;18298;18299;18300;18301;18302;18303;18304;18305;18306;18307;18308;18309;18310;18311;18312;18313;33803;34222;34223;34224;34225;36516;36517;36518;36519;36520;36533;36534;36535;36536;36537;36538;36539;36540;36541;36542;36543;36544;36545;36546;36547;36548;36549;36550;36551;36552;36553;36554;36555;36556;36557;36558;36559;36564;36565;36566;36567;36568;36569;365…	18131;18306;33803;34223;36519;36549;36565;36959;39885;44482;45258;73498;77559;78061	111;243;244;245;246	299;398;410;535;578
P02462-2;P02462	P02462-2;P02462	14;14	14;14	12;12	Collagen alpha-1(IV) chain;Arresten	COL4A1	Isoform of P02462, Isoform 2 of Collagen alpha-1(IV) chain;Collagen alpha-1(IV) chain	Core matrisome	Collagens	188574000000	34897000000	28966000000	32776000000	23647000000	31407000000	36881000000		62	118	80	89	130	88	94	104	765				604	351;352;2606;2792;2838;3097;3316;3591;3949;4235;4254;5455;5456;6634	True;True;True;True;True;True;True;True;True;True;True;True;True;True	369;370;2763;2764;2968;3018;3292;3528;3822;4201;4506;4526;5859;5860;5861;5862;5863;7122	3411;3412;3413;3414;3415;3416;3417;3418;3419;3420;3421;3422;3423;3424;3425;3426;3427;3428;3429;3430;3431;3432;3433;3434;3435;3436;3437;3438;3439;3440;3441;3442;3443;3444;3445;3446;3447;3448;3449;3450;3451;3452;3453;3454;3455;3456;3457;3458;3459;3460;3461;3462;3463;3464;3465;3466;3467;3468;3469;3470;3471;3472;3473;3474;3475;3476;3477;3478;3479;3480;3481;3482;3483;3484;3485;3486;3487;3488;3489;3490…	3594;3595;3596;3597;3598;3599;3600;3601;3602;3603;3604;3605;3606;3607;3608;3609;3610;3611;3612;3613;3614;3615;3616;3617;3618;3619;3620;3621;3622;3623;3624;3625;3626;3627;3628;3629;3630;3631;3632;3633;3634;3635;3636;3637;3638;3639;3640;3641;3642;3643;3644;3645;3646;3647;3648;3649;3650;3651;3652;3653;3654;3655;3656;3657;3658;3659;3660;3661;3662;3663;3664;3665;3666;3667;3668;3669;3670;3671;3672;3673…	3666;3719;33352;35232;36521;41638;46584;50619;55154;58481;58622;73170;73225;88023	247;248;249;250;251	1059;1149;1178;1180;1182
A0A087WXW9;P20908	A0A087WXW9;P20908	5;5	5;5	4;4	Collagen alpha-1(V) chain	COL5A1	Isoform of P20908, Collagen alpha-1(V) chain;Collagen alpha-1(V) chain	Core matrisome	Collagens	2510880000	469520000	357740000	675470000	184090000	312450000	511610000		4	16	4	10	17	16	17	21	105				40	2865;3162;3189;3234;7397	True;True;True;True;True	3051;3364;3365;3393;3394;3441;7930	35329;35330;35331;35332;35333;35334;35335;35336;35337;35338;35339;35340;35341;35342;39725;39726;39727;39728;39729;39730;39731;39732;39733;39734;39735;39736;39737;39738;39739;39740;39741;39742;39743;39744;39745;39746;39747;41020;41021;41022;41023;41024;41025;41026;41027;41028;41029;41030;41031;41032;41033;41034;41035;41036;41037;41038;41039;41040;41041;41042;41043;41044;41045;41046;41047;41048;410…	37752;37753;37754;37755;37756;37757;37758;37759;37760;37761;37762;37763;37764;37765;42501;42502;42503;42504;42505;42506;42507;42508;42509;42510;42511;42512;42513;42514;42515;42516;42517;42518;42519;42520;42521;42522;42523;43838;43839;43840;43841;43842;43843;43844;43845;43846;43847;43848;43849;43850;43851;43852;43853;43854;43855;43856;43857;43858;43859;43860;43861;43862;43863;43864;43865;43866;438…	37758;42510;43881;45286;97058	12;13	538;564
A0A087X0S5;P12109	A0A087X0S5;P12109	43;43	43;43	43;43	Collagen alpha-1(VI) chain	COL6A1	Isoform of P12109, Collagen alpha-1(VI) chain;Collagen alpha-1(VI) chain	Core matrisome	Collagens	231176000000	48308000000	40216000000	18199000000	41981000000	44484000000	37988000000		182	270	149	266	199	238	176	239	1719				51	1156;1542;1652;1675;1676;2134;2137;2406;2460;2511;2766;2789;2790;2811;3001;3060;3171;3350;3366;3367;3644;3645;4723;5014;5015;5046;5592;5617;5978;6289;6377;6378;6408;6457;6705;6947;7213;7214;7806;7948;8046;8268;8753	True;True;True;True;True;True;True;True;True;True;True;True;True;True;True;True;True;True;True;True;True;True;True;True;True;True;True;True;True;True;True;True;True;True;True;True;True;True;True;True;True;True;True	1227;1630;1747;1775;1776;2256;2259;2545;2546;2607;2660;2939;2965;2966;2989;3194;3254;3374;3564;3581;3582;3879;3880;5013;5328;5329;5362;6007;6040;6419;6761;6852;6853;6884;6936;7199;7449;7450;7733;7734;8371;8520;8619;8858;9363	15282;15283;15284;15285;15286;15287;15288;15289;15290;15291;15292;15293;15294;15295;15296;15297;15298;15299;15300;15301;15302;15303;15304;15305;15306;19168;19169;19170;19171;19172;19173;19174;19175;19176;19177;19178;19179;19180;19181;19182;19183;19184;19185;19186;19187;19188;19189;19190;19191;19192;19193;19194;19195;19196;19197;19198;19199;19200;19201;19202;19203;19204;19205;19206;19207;19208;192…	16381;16382;16383;16384;16385;16386;16387;16388;16389;16390;16391;16392;16393;16394;16395;16396;16397;16398;16399;16400;16401;16402;16403;16404;16405;16406;20516;20517;20518;20519;20520;20521;20522;20523;20524;20525;20526;20527;20528;20529;20530;20531;20532;20533;20534;20535;20536;20537;20538;20539;20540;20541;20542;20543;20544;20545;20546;20547;20548;20549;20550;20551;20552;20553;20554;20555;205…	16395;20579;22277;22534;22542;27881;27926;30995;31652;32140;35027;35222;35226;35579;40461;41007;43735;47094;47265;47275;51286;51333;63623;67565;67663;67934;75166;75578;79491;83868;84939;84985;85255;85850;88672;91058;95047;95052;102150;103864;105129;107857;113929	24;25;26;27	238;601;668;695
Q02388-2;Q02388	Q02388-2;Q02388	1;1	1;1	1;1	Collagen alpha-1(VII) chain	COL7A1	Isoform of Q02388, Isoform 2 of Collagen alpha-1(VII) chain;Collagen alpha-1(VII) chain	Core matrisome	Collagens	0	0	0	0	0	0	0		0	0	0	0	1	0	0	0	1				1008	5125	TRUE	5446	64410	68664	68664
P27658;A0A087WZI0;C9JTN9	P27658	5;2;1	5;2;1	5;2;1	Collagen alpha-1(VIII) chain;Vastatin	COL8A1	Collagen alpha-1(VIII) chain	Core matrisome	Collagens	2638040000	0	513590000	552810000	501650000	626680000	443310000		2	10	7	11	19	13	12	11	85				803	2003;2012;2906;2964;5607	True;True;True;True;True	2122;2131;3095;3157;6029;6030	24868;24869;24870;24871;24872;24873;24874;24875;24876;24877;24878;24879;24880;24881;24882;24883;24884;24885;24886;24887;24888;24889;24890;24891;24892;24990;24991;24992;24993;24994;24995;24996;35948;35949;35950;35951;35952;35953;35954;35955;35956;35957;35958;35959;35960;35961;37226;37227;37228;37229;37230;37231;37232;37233;37234;37235;37236;37237;37238;37239;37240;37241;37242;37243;70798;70799;708…	26653;26654;26655;26656;26657;26658;26659;26660;26661;26662;26663;26664;26665;26666;26667;26668;26669;26670;26671;26672;26673;26674;26675;26676;26677;26781;26782;26783;26784;26785;26786;26787;38456;38457;38458;38459;38460;38461;38462;38463;38464;38465;38466;38467;38468;38469;38470;39864;39865;39866;39867;39868;39869;39870;39871;39872;39873;39874;39875;39876;39877;39878;39879;39880;39881;75446;754…	26677;26785;38461;39881;75457	424	686
P12107-4;P12107-3;P12107;P12107-2;A0A0U1RRA7	P12107-4;P12107-3;P12107;P12107-2;A0A0U1RRA7	4;4;4;4;2	3;3;3;3;2	3;3;3;3;2	Collagen alpha-1(XI) chain	COL11A1	Isoform of P12107, Isoform 4 of Collagen alpha-1(XI) chain;Isoform of P12107, Isoform C of Collagen alpha-1(XI) chain;Collagen alpha-1(XI) chain;Isoform of P12107, Isoform B of Collagen alpha-1(XI) chain;Isoform of P12107, Collagen alpha-1(XI) chain (Fragm	Core matrisome	Collagens	83631000	0	0	0	0	83631000	0		0	0	0	2	0	4	4	1	11				712	2865;2872;3089;7399	False;True;True;True	3051;3058;3284;7932	35329;35330;35331;35332;35333;35334;35335;35336;35337;35338;35339;35340;35341;35342;35494;35495;35496;38781;91100;91101;91102;91103;91104;91105;91106;91107	37752;37753;37754;37755;37756;37757;37758;37759;37760;37761;37762;37763;37764;37765;37947;37948;37949;41485;97062;97063;97064;97065;97066;97067;97068;97069	37758;37949;41485;97065
A0A087X0A8;D6RGG3;Q99715-2;Q99715;Q99715-4;H0Y5N9;H0Y4P7;H0Y991	A0A087X0A8;D6RGG3;Q99715-2;Q99715;Q99715-4	48;48;48;48;45;18;17;9	48;48;48;48;45;18;17;9	48;48;48;48;45;18;17;9	Collagen alpha-1(XII) chain	COL12A1	Isoform of Q99715, Collagen alpha-1(XII) chain;Isoform of Q99715, Collagen alpha-1(XII) chain;Isoform of Q99715, Isoform 2 of Collagen alpha-1(XII) chain;Collagen alpha-1(XII) chain;Isoform of Q99715, Isoform 4 of Collagen alpha-1(XII) chain	Core matrisome	Collagens	4729110000	690320000	660680000	344280000	824760000	1461900000	747170000		18	54	14	68	33	99	74	41	401				49	421;1244;1648;2273;2305;2797;2875;3179;3224;3348;3608;3825;3883;4120;4150;4153;4160;4164;4210;4526;4654;4742;4743;5035;5323;5470;5581;5618;5722;5918;6274;6522;6618;6930;7330;7478;7509;7738;7928;8025;8189;8190;8201;8387;8390;8529;8538;8570	True;True;True;True;True;True;True;True;True;True;True;True;True;True;True;True;True;True;True;True;True;True;True;True;True;True;True;True;True;True;True;True;True;True;True;True;True;True;True;True;True;True;True;True;True;True;True;True	441;1316;1743;2403;2438;2974;3062;3383;3431;3562;3842;4071;4132;4385;4417;4420;4427;4431;4479;4811;4944;5032;5033;5350;5680;5879;5996;6041;6151;6357;6745;7005;7106;7431;7858;8014;8052;8299;8500;8598;8771;8772;8773;8774;8786;8980;8983;9134;9143;9175	4349;4350;4351;4352;4353;4354;4355;4356;4357;4358;4359;4360;4361;4362;4363;4364;4365;4366;4367;4368;4369;4370;4371;4372;4373;4374;4375;4376;4377;4378;15972;15973;15974;15975;15976;15977;15978;15979;15980;20700;20701;20702;20703;20704;20705;20706;20707;20708;20709;20710;20711;20712;20713;20714;20715;20716;20717;20718;20719;27439;27440;27441;27442;27443;27444;27445;27734;33128;33129;33130;33131;331…	4585;4586;4587;4588;4589;4590;4591;4592;4593;4594;4595;4596;4597;4598;4599;4600;4601;4602;4603;4604;4605;4606;4607;4608;4609;4610;4611;4612;4613;4614;17119;17120;17121;17122;17123;17124;17125;17126;17127;22210;22211;22212;22213;22214;22215;22216;22217;22218;22219;22220;22221;22222;22223;22224;22225;22226;22227;22228;22229;22230;22231;29360;29361;29362;29363;29364;29365;29366;29658;35348;35349;353…	4598;17125;22224;29366;29658;35351;37973;43779;45138;47084;50874;53632;54308;57216;57549;57623;57661;57672;58209;61550;62978;63880;63887;67843;71229;73309;75077;75634;76670;79047;83693;86505;87780;90924;96115;97929;98675;101401;103566;104836;106699;106715;106900;109305;109322;111351;111419;111643	21;22	156;1232
Q05707-2;Q05707;Q05707-3;J3QT83;A0A0A0MQT7;Q4G0W3;H0YBB2;J3QT75;Q5VSY0-2;H3BU53;Q8IWI9-2;Q8IWI9-3;Q8IWI9;Q8IWI9-4	Q05707-2;Q05707;Q05707-3;J3QT83	70;70;63;36;29;17;9;1;1;1;1;1;1;1	70;70;63;36;29;17;9;1;1;1;1;1;1;1	70;70;63;36;29;17;9;1;1;1;1;1;1;1	Collagen alpha-1(XIV) chain	COL14A1	Isoform of Q05707, Isoform 2 of Collagen alpha-1(XIV) chain;Collagen alpha-1(XIV) chain;Isoform of Q05707, Isoform 3 of Collagen alpha-1(XIV) chain;Isoform of Q05707, Collagen alpha-1(XIV) chain (Fragment)	Core matrisome	Collagens	42567000000	8209500000	7768500000	4715200000	8086500000	6548300000	7239000000		179	300	122	284	254	251	198	259	1847				1019	142;665;890;1183;1254;1286;1315;1632;1633;2209;2246;2784;2852;2959;3152;3325;3454;3481;3605;3606;3708;3758;3759;3780;3801;3804;3820;3821;3871;3930;4093;4151;4195;4241;4599;4778;4806;4905;5114;5348;5591;5665;5755;5872;6064;6273;7020;7042;7300;7473;7500;7517;7518;7545;7606;7876;8084;8336;8337;8448;8453;8456;8481;8482;8530;8569;8750;8829;8854;8874	True;True;True;True;True;True;True;True;True;True;True;True;True;True;True;True;True;True;True;True;True;True;True;True;True;True;True;True;True;True;True;True;True;True;True;True;True;True;True;True;True;True;True;True;True;True;True;True;True;True;True;True;True;True;True;True;True;True;True;True;True;True;True;True;True;True;True;True;True;True	152;703;936;1254;1327;1362;1363;1393;1727;1728;2336;2374;2957;2958;3035;3036;3152;3354;3538;3673;3701;3838;3839;3840;3943;3995;3996;3997;4020;4041;4044;4064;4065;4066;4067;4120;4182;4355;4418;4464;4512;4887;5072;5105;5106;5212;5213;5435;5716;5717;5718;5719;6006;6089;6188;6307;6517;6743;6744;7524;7546;7547;7826;8009;8042;8060;8061;8094;8156;8446;8662;8927;8928;9046;9051;9054;9055;9083;9084;9135;91…	1503;7259;7260;7261;7262;7263;7264;7265;7266;7267;7268;7269;7270;7271;7272;7273;7274;7275;9948;9949;15524;15525;15526;15527;15528;15529;15530;15531;15532;15533;15534;15535;15536;15537;15538;15539;15540;15541;15542;15543;15544;15545;15546;16033;16034;16035;16036;16037;16038;16039;16040;16459;16460;16461;16462;16463;16464;16465;16466;16467;16468;16469;16470;16471;16472;16473;16474;16475;16476;16477…	1578;7646;7647;7648;7649;7650;7651;7652;7653;7654;7655;7656;7657;7658;7659;7660;7661;7662;10496;10497;16630;16631;16632;16633;16634;16635;16636;16637;16638;16639;16640;16641;16642;16643;16644;16645;16646;16647;16648;16649;16650;16651;16652;16653;17187;17188;17189;17190;17191;17192;17193;17194;17627;17628;17629;17630;17631;17632;17633;17634;17635;17636;17637;17638;17639;17640;17641;17642;17643;176…	1578;7657;10496;16648;17188;17647;18006;21978;22003;28766;29133;35156;36905;39798;42382;46730;48519;48960;50808;50861;51830;52604;52665;52896;53115;53151;53544;53557;54202;54842;56875;57569;58007;58491;62390;64540;64844;66139;68542;71673;75145;76096;77098;78690;80550;83654;91937;92243;95879;97871;98544;98737;98738;98938;99528;102998;105537;108736;108745;109952;110069;110107;110682;110733;111360;1…	611;612;613;614;615;616;617;618;619;620;621;622;623;624	657;770;785;914;932;1002;1074;1232;1233;1235;1251;1417;1615;1632
A0A087X0K0;P39059	A0A087X0K0;P39059	15;15	15;15	15;15	Collagen alpha-1(XV) chain;Restin;Restin-2;Restin-3;Restin-4	COL15A1	Isoform of P39059, Collagen alpha-1(XV) chain;Collagen alpha-1(XV) chain	Core matrisome	Collagens	1385510000	193260000	190970000	131150000	217500000	298930000	353700000		7	19	3	17	27	28	17	26	144				50	31;121;261;262;1609;2625;2981;3861;5124;5589;5747;7211;7481;8085;8841	True;True;True;True;True;True;True;True;True;True;True;True;True;True;True	32;127;275;276;1703;2787;3174;4108;5445;6004;6179;6180;7731;8017;8663;9455	254;255;256;257;258;259;260;261;262;263;264;265;266;267;268;269;270;1227;1228;1229;1230;1231;1232;1233;2319;2320;2321;2322;2323;2324;2325;2326;2327;2328;2329;20218;20219;20220;20221;20222;20223;31499;31500;31501;31502;31503;31504;31505;31506;31507;31508;31509;31510;31511;31512;31513;37484;37485;37486;37487;37488;37489;37490;37491;37492;37493;37494;37495;37496;37497;37498;37499;37500;37501;37502;3…	262;263;264;265;266;267;268;269;270;271;272;273;274;275;276;277;278;279;1288;1289;1290;1291;1292;1293;1294;2419;2420;2421;2422;2423;2424;2425;2426;2427;2428;2429;21716;21717;21718;21719;21720;21721;33625;33626;33627;33628;33629;33630;33631;33632;33633;33634;33635;33636;33637;33638;33639;33640;40143;40144;40145;40146;40147;40148;40149;40150;40151;40152;40153;40154;40155;40156;40157;40158;40159;401…	269;1291;2421;2428;21719;33631;40158;54050;68661;75134;76999;94967;97947;105562;115347	23	1211
Q07092-2;Q07092;A6NCT7;H7C3F0;H7BY97	Q07092-2;Q07092	9;9;3;2;1	9;9;3;2;1	9;9;3;2;1	Collagen alpha-1(XVI) chain	COL16A1	Isoform of Q07092, Isoform 2 of Collagen alpha-1(XVI) chain;Collagen alpha-1(XVI) chain	Core matrisome	Collagens	5647840000	825730000	918440000	1878800000	585950000	535140000	903780000		10	21	13	16	19	9	12	19	119				1023	1334;1647;2471;2821;3107;5273;6379;6839;8028	True;True;True;True;True;True;True;True;True	1412;1742;2619;3000;3001;3302;5606;5607;6854;7337;8601	16969;16970;16971;16972;16973;16974;20699;29678;29679;29680;29681;29682;29683;29684;29685;29686;34031;34032;34033;34034;34035;38965;38966;38967;38968;38969;38970;38971;38972;38973;38974;38975;38976;38977;38978;38979;38980;38981;38982;38983;38984;38985;38986;38987;38988;38989;38990;38991;38992;38993;38994;38995;38996;38997;66299;66300;66301;66302;66303;66304;66305;66306;66307;66308;66309;66310;663…	18147;18148;18149;18150;18151;18152;22209;31724;31725;31726;31727;31728;31729;31730;31731;31732;36314;36315;36316;36317;36318;41696;41697;41698;41699;41700;41701;41702;41703;41704;41705;41706;41707;41708;41709;41710;41711;41712;41713;41714;41715;41716;41717;41718;41719;41720;41721;41722;41723;41724;41725;41726;41727;41728;41729;41730;70666;70667;70668;70669;70670;70671;70672;70673;70674;70675;706…	18150;22209;31730;36314;41721;70671;84996;89950;104888	627;628	1040;1453
P39060-2;P39060-1;P39060;H7BXV5;H7C457	P39060-2;P39060-1;P39060;H7BXV5;H7C457	21;21;21;16;14	21;21;21;16;14	21;21;21;16;14	Collagen alpha-1(XVIII) chain;Endostatin	COL18A1	Isoform of P39060, Isoform 3 of Collagen alpha-1(XVIII) chain;Isoform of P39060, Isoform 2 of Collagen alpha-1(XVIII) chain;Collagen alpha-1(XVIII) chain;Isoform of P39060, Collagen alpha-1(XVIII) chain (Fragment);Isoform of P39060, Collagen alpha-1(XVIII)	Core matrisome	Collagens	2077620000	404240000	404050000	309510000	263270000	436680000	259870000		11	37	8	21	55	32	20	22	206				856	81;116;795;1282;1686;2071;2558;2696;3057;3322;3555;3772;4894;4895;5011;5069;6476;7179;7180;7292;8710	True;True;True;True;True;True;True;True;True;True;True;True;True;True;True;True;True;True;True;True;True	86;122;835;1357;1358;1786;2193;2710;2867;3251;3535;3779;4010;5199;5200;5325;5387;6955;7691;7692;7818;9319	774;775;776;777;778;779;780;781;782;783;784;785;786;787;788;789;790;791;1201;8766;8767;8768;16445;16446;16447;16448;16449;16450;21107;21108;25466;25467;25468;25469;25470;25471;25472;30604;30605;30606;30607;30608;30609;30610;30611;30612;30613;30614;32094;32095;32096;32097;32098;32099;32100;32101;32102;32103;32104;32105;32106;32107;32108;32109;32110;32111;32112;32113;32114;32115;32116;32117;32118;3…	809;810;811;812;813;814;815;816;817;818;819;820;821;822;823;824;825;826;1262;9250;9251;9252;17613;17614;17615;17616;17617;17618;22633;22634;27287;27288;27289;27290;27291;27292;27293;32681;32682;32683;32684;32685;32686;32687;32688;32689;32690;32691;34246;34247;34248;34249;34250;34251;34252;34253;34254;34255;34256;34257;34258;34259;34260;34261;34262;34263;34264;34265;34266;34267;34268;34269;34270;4…	820;1262;9252;17616;22633;27292;32686;34255;40966;46687;49853;52786;65922;65950;67527;68151;86007;94287;94292;95836;113502	495	1179
F5GZK2;Q96P44-3;Q96P44;Q96P44-2;H0YDH6	F5GZK2;Q96P44-3;Q96P44	7;7;7;2;1	7;7;7;2;1	7;7;7;2;1	Collagen alpha-1(XXI) chain	COL21A1	Isoform of Q96P44, Collagen alpha-1(XXI) chain;Isoform of Q96P44, Isoform 3 of Collagen alpha-1(XXI) chain;Collagen alpha-1(XXI) chain	Core matrisome	Collagens	3699970000	868820000	621140000	797160000	303160000	382000000	727690000		12	17	14	13	21	14	14	12	117				352	623;1892;3131;3666;5867;6276;7472	True;True;True;True;True;True;True	658;2002;3331;3901;6302;6747;8008	6787;6788;6789;6790;6791;6792;6793;6794;6795;6796;6797;6798;6799;6800;6801;6802;6803;6804;6805;6806;6807;6808;6809;6810;6811;6812;6813;6814;6815;6816;6817;6818;6819;6820;6821;6822;6823;6824;6825;6826;6827;6828;6829;6830;6831;6832;6833;6834;6835;6836;6837;6838;6839;6840;6841;6842;6843;6844;6845;6846;6847;6848;6849;6850;6851;6852;6853;23100;23101;23102;23103;23104;23105;23106;23107;23108;23109;2311…	7161;7162;7163;7164;7165;7166;7167;7168;7169;7170;7171;7172;7173;7174;7175;7176;7177;7178;7179;7180;7181;7182;7183;7184;7185;7186;7187;7188;7189;7190;7191;7192;7193;7194;7195;7196;7197;7198;7199;7200;7201;7202;7203;7204;7205;7206;7207;7208;7209;7210;7211;7212;7213;7214;7215;7216;7217;7218;7219;7220;7221;7222;7223;7224;7225;7226;7227;24732;24733;24734;24735;24736;24737;24738;24739;24740;24741;2474…	7198;24740;42070;51566;78656;83700;97848
Q96A83-2;Q96A83	Q96A83-2;Q96A83	3;3	3;3	3;3	Collagen alpha-1(XXVI) chain	COL26A1	Isoform of Q96A83, Isoform 2 of Collagen alpha-1(XXVI) chain;Collagen alpha-1(XXVI) chain	Core matrisome	Collagens	64118000	0	0	0	0	64118000	0		0	0	0	0	0	4	1	1	6				1174	73;4996;5104	True;True;True	77;5310;5424	704;63138;64224;64225;64226	738;67363;68472;68473;68474;68475	738;67363;68474
Q2UY09;Q2UY09-3;Q2UY09-2;H7BZU0;H7C3P2	Q2UY09;Q2UY09-3;Q2UY09-2	10;6;6;1;1	10;6;6;1;1	10;6;6;1;1	Collagen alpha-1(XXVIII) chain	COL28A1	Collagen alpha-1(XXVIII) chain;Isoform of Q2UY09, Isoform 3 of Collagen alpha-1(XXVIII) chain;Isoform of Q2UY09, Isoform 2 of Collagen alpha-1(XXVIII) chain	Core matrisome	Collagens	302158000	0	56924000	0	93800000	58821000	92613000		3	5	2	21	2	9	0	14	56				1096	1292;3771;4011;4644;4647;5625;5813;7769;7770;8491	True;True;True;True;True;True;True;True;True;True	1369;4009;4269;4933;4936;6048;6248;8332;8333;9094;9095	16521;16522;16523;16524;16525;49261;49262;52187;52188;52189;52190;52191;52192;52193;52194;52195;52196;52197;52198;52199;52200;52201;52202;52203;58907;58908;58909;58910;58911;58912;58924;58925;71031;71032;71033;73228;95474;95475;104192;104193;104194;104195;104196;104197;104198;104199;104200;104201;104202;104203;104204;104205;104206;104207;104208	17689;17690;17691;17692;17693;52780;52781;55884;55885;55886;55887;55888;55889;55890;55891;55892;55893;55894;55895;55896;55897;55898;55899;55900;55901;62931;62932;62933;62934;62935;62936;62950;62951;62952;75690;75691;75692;78022;101702;101703;110928;110929;110930;110931;110932;110933;110934;110935;110936;110937;110938;110939;110940;110941;110942;110943;110944	17692;52780;55896;62934;62951;75691;78022;101702;101703;110930	668	159
A0A087WTA8;P08123	A0A087WTA8;P08123	35;35	35;35	35;35	Collagen alpha-2(I) chain	COL1A2	Isoform of P08123, Collagen alpha-2(I) chain;Collagen alpha-2(I) chain	Core matrisome	Collagens	438180000000	79641000000	70071000000	96011000000	56189000000	57354000000	78914000000		108	186	152	191	149	202	259	235	1482				17	341;1937;1938;2724;2725;2726;2773;2796;2810;2831;2832;2833;2841;2844;2846;2848;2853;2866;2871;2986;2993;3015;3115;3165;3190;3194;3205;3206;3207;3370;3400;3499;5818;7389;7956	True;True;True;True;True;True;True;True;True;True;True;True;True;True;True;True;True;True;True;True;True;True;True;True;True;True;True;True;True;True;True;True;True;True;True	359;2047;2048;2895;2896;2897;2946;2973;2988;3011;3012;3013;3022;3025;3027;3029;3037;3052;3057;3179;3186;3208;3310;3368;3395;3399;3411;3412;3413;3585;3586;3587;3618;3721;6253;7921;8528	3156;3157;3158;3159;3160;3161;3162;3163;3164;3165;3166;3167;3168;3169;3170;3171;3172;3173;3174;23632;23633;23634;23635;23636;23637;23638;23639;23640;23641;23642;23643;23644;23645;23646;23647;32353;32354;32355;32356;32357;32358;32359;32360;32361;32362;32363;32364;32365;32366;32367;32368;32369;32370;32371;32372;32373;32374;32375;32376;32377;32378;32379;32380;32381;32382;32383;32384;32385;32386;3238…	3308;3309;3310;3311;3312;3313;3314;3315;3316;3317;3318;3319;3320;3321;3322;3323;3324;3325;3326;3327;3328;25301;25302;25303;25304;25305;25306;25307;25308;25309;25310;25311;25312;25313;25314;25315;25316;34515;34516;34517;34518;34519;34520;34521;34522;34523;34524;34525;34526;34527;34528;34529;34530;34531;34532;34533;34534;34535;34536;34537;34538;34539;34540;34541;34542;34543;34544;34545;34546;34547;…	3308;25301;25302;34644;34658;34660;35086;35322;35578;36490;36495;36499;36562;36591;36606;36639;36930;37766;37925;40260;40290;40558;41795;43359;43907;44006;44109;44111;44279;47280;47762;49267;78057;96871;104012	2;3;4;5	91;94;445;783
P08572;A2A352	P08572	22;1	22;1	22;1	Collagen alpha-2(IV) chain;Canstatin	COL4A2	Collagen alpha-2(IV) chain	Core matrisome	Collagens	190188000000	30325000000	30676000000	23707000000	30113000000	34255000000	41112000000		104	172	117	164	218	167	145	199	1286				681	362;750;793;1096;2389;2607;2608;2765;2791;2850;2851;2982;3050;3090;3315;3405;3590;3665;5223;7170;7203;8837	True;True;True;True;True;True;True;True;True;True;True;True;True;True;True;True;True;True;True;True;True;True	380;789;833;1162;2526;2765;2766;2767;2768;2938;2967;3031;3032;3033;3034;3175;3244;3285;3527;3623;3819;3820;3821;3900;5546;7682;7721;7722;7723;9451	3728;3729;3730;3731;3732;3733;3734;3735;3736;3737;3738;3739;3740;3741;3742;3743;3744;3745;3746;3747;3748;3749;3750;3751;3752;3753;3754;3755;3756;3757;3758;3759;3760;3761;3762;3763;3764;3765;3766;3767;3768;3769;3770;3771;3772;3773;3774;3775;3776;3777;3778;3779;3780;3781;3782;3783;3784;3785;3786;3787;3788;3789;3790;3791;3792;3793;3794;3795;3796;3797;3798;3799;3800;3801;8218;8219;8220;8221;8222;8223…	3934;3935;3936;3937;3938;3939;3940;3941;3942;3943;3944;3945;3946;3947;3948;3949;3950;3951;3952;3953;3954;3955;3956;3957;3958;3959;3960;3961;3962;3963;3964;3965;3966;3967;3968;3969;3970;3971;3972;3973;3974;3975;3976;3977;3978;3979;3980;3981;3982;3983;3984;3985;3986;3987;3988;3989;3990;3991;3992;3993;3994;3995;3996;3997;3998;3999;4000;4001;4002;4003;4004;4005;4006;4007;4008;4009;4010;4011;4012;4013…	3953;8678;9248;15422;30634;33409;33463;35023;35227;36685;36785;40178;40802;41553;46548;47832;50466;51542;69924;94166;94632;115280	325;326;327;328;329;330;331	986;1355;1503;1508;1544;1575;1576
P05997;A0A087WYX9	P05997	8;3	8;3	8;3	Collagen alpha-2(V) chain	COL5A2	Collagen alpha-2(V) chain	Core matrisome	Collagens	9542600000	1760800000	1580600000	1196700000	1199000000	1466100000	2339400000		19	35	29	26	33	30	29	37	238				653	2813;3032;3122;3172;3706;5749;6804;7992	True;True;True;True;True;True;True;True	2991;2992;3226;3317;3375;3941;6182;7299;8564	33877;33878;33879;33880;33881;33882;33883;33884;33885;33886;33887;33888;33889;33890;33891;33892;33893;33894;33895;33896;33897;33898;33899;33900;33901;33902;33903;33904;33905;33906;33907;33908;33909;33910;33911;33912;33913;33914;33915;33916;37963;37964;37965;37966;37967;37968;37969;37970;37971;37972;37973;37974;37975;37976;37977;37978;37979;37980;37981;37982;37983;37984;37985;37986;37987;37988;390…	36137;36138;36139;36140;36141;36142;36143;36144;36145;36146;36147;36148;36149;36150;36151;36152;36153;36154;36155;36156;36157;36158;36159;36160;36161;36162;36163;36164;36165;36166;36167;36168;36169;36170;36171;36172;36173;36174;36175;36176;36177;36178;36179;40636;40637;40638;40639;40640;40641;40642;40643;40644;40645;40646;40647;40648;40649;40650;40651;40652;40653;40654;40655;40656;40657;40658;406…	36157;40639;41824;43740;51799;77067;89387;104442	303;304;305;306	211;329;332;997
P12110;P12110-3;C9JH44;H7C0M5	P12110;P12110-3	38;29;4;4	38;29;4;4	9;0;0;0	Collagen alpha-2(VI) chain	COL6A2	Collagen alpha-2(VI) chain;Isoform of P12110, Isoform 2C2A of Collagen alpha-2(VI) chain	Core matrisome	Collagens	128075000000	27309000000	22764000000	11017000000	22741000000	22277000000	21967000000		141	239	112	206	167	206	150	208	1429				713	425;1216;1217;1367;1368;1695;1710;1782;2240;2647;2648;3045;3345;3460;3461;3471;3472;3698;4492;4493;4538;5454;5486;5555;5577;5578;5951;6203;6343;6387;7614;7915;7916;7917;8012;8013;8329;8692	True;True;True;True;True;True;True;True;True;True;True;True;True;True;True;True;True;True;True;True;True;True;True;True;True;True;True;True;True;True;True;True;True;True;True;True;True;True	445;446;1288;1289;1446;1447;1795;1796;1812;1889;2368;2811;2812;3239;3559;3679;3680;3690;3691;3933;4776;4777;4823;5857;5858;5896;5967;5992;5993;6391;6666;6815;6863;8165;8486;8487;8488;8585;8586;8920;9300	4403;4404;4405;4406;4407;4408;4409;4410;4411;4412;4413;4414;4415;4416;4417;4418;4419;4420;4421;4422;4423;4424;4425;4426;4427;4428;4429;4430;4431;4432;4433;4434;4435;4436;4437;4438;4439;4440;4441;4442;4443;4444;4445;4446;4447;4448;4449;4450;4451;4452;4453;4454;4455;4456;4457;4458;4459;4460;4461;4462;4463;4464;4465;4466;4467;4468;4469;4470;4471;4472;4473;4474;4475;4476;4477;4478;4479;4480;4481;4482…	4640;4641;4642;4643;4644;4645;4646;4647;4648;4649;4650;4651;4652;4653;4654;4655;4656;4657;4658;4659;4660;4661;4662;4663;4664;4665;4666;4667;4668;4669;4670;4671;4672;4673;4674;4675;4676;4677;4678;4679;4680;4681;4682;4683;4684;4685;4686;4687;4688;4689;4690;4691;4692;4693;4694;4695;4696;4697;4698;4699;4700;4701;4702;4703;4704;4705;4706;4707;4708;4709;4710;4711;4712;4713;4714;4715;4716;4717;4718;4719…	4827;16867;16871;18478;18523;22755;23101;23873;29102;33845;33866;40747;47042;48592;48651;48758;48784;51727;61208;61252;61660;73126;73440;74424;74920;74985;79355;82508;84586;85081;99680;103390;103413;103475;104696;104741;108668;113211	364;365;366	219;762;982
P12110-2	P12110-2	30	1	1	Collagen alpha-2(VI) chain	COL6A2	Isoform of P12110, Isoform 2C2A of Collagen alpha-2(VI) chain	Core matrisome	Collagens	8698400	0	0	0	0	8698400	0		0	0	0	1	1	1	0	0	3				714	425;1216;1367;1368;1695;1782;2240;3045;3345;3460;3461;3471;3472;3698;4492;4493;5454;5486;5555;5577;5578;7294;7614;7915;7916;7917;8012;8013;8329;8692	False;False;False;False;False;False;False;False;False;False;False;False;False;False;False;False;False;False;False;False;False;True;False;False;False;False;False;False;False;False	445;446;1288;1446;1447;1795;1796;1889;2368;3239;3559;3679;3680;3690;3691;3933;4776;4777;5857;5858;5896;5967;5992;5993;7820;8165;8486;8487;8488;8585;8586;8920;9300	4403;4404;4405;4406;4407;4408;4409;4410;4411;4412;4413;4414;4415;4416;4417;4418;4419;4420;4421;4422;4423;4424;4425;4426;4427;4428;4429;4430;4431;4432;4433;4434;4435;4436;4437;4438;4439;4440;4441;4442;4443;4444;4445;4446;4447;4448;4449;4450;4451;4452;4453;4454;4455;4456;4457;4458;4459;4460;4461;4462;4463;4464;4465;4466;4467;4468;4469;4470;4471;4472;4473;4474;4475;4476;4477;4478;4479;4480;4481;4482…	4640;4641;4642;4643;4644;4645;4646;4647;4648;4649;4650;4651;4652;4653;4654;4655;4656;4657;4658;4659;4660;4661;4662;4663;4664;4665;4666;4667;4668;4669;4670;4671;4672;4673;4674;4675;4676;4677;4678;4679;4680;4681;4682;4683;4684;4685;4686;4687;4688;4689;4690;4691;4692;4693;4694;4695;4696;4697;4698;4699;4700;4701;4702;4703;4704;4705;4706;4707;4708;4709;4710;4711;4712;4713;4714;4715;4716;4717;4718;4719…	4827;16867;18478;18523;22755;23873;29102;40747;47042;48592;48651;48758;48784;51727;61208;61252;73126;73440;74424;74920;74985;95855;99680;103390;103413;103475;104696;104741;108668;113211	364;365	219;762
E9PP49;P25067;Q4VAQ0	E9PP49;P25067;Q4VAQ0	3;3;2	3;3;2	3;3;2	Collagen alpha-2(VIII) chain	COL8A2	Isoform of P25067, Collagen alpha-2(VIII) chain;Collagen alpha-2(VIII) chain;Isoform of P25067, COL8A2 protein	Core matrisome	Collagens	155692000	0	44542000	34746000	31570000	0	44834000		0	4	4	4	5	4	5	4	30				343	2795;3337;5619	True;True;True	2972;3551;6042	33092;33093;33094;33095;33096;33097;33098;33099;33100;33101;43813;43814;43815;43816;43817;43818;43819;43820;43821;43822;43823;43824;43825;43826;43827;43828;43829;43830;43831;43832;70978	35308;35309;35310;35311;35312;35313;35314;35315;35316;35317;46893;46894;46895;46896;46897;46898;46899;46900;46901;46902;46903;46904;46905;46906;46907;46908;46909;46910;46911;46912;75635	35316;46899;75635
Q01955;Q01955-2	Q01955;Q01955-2	3;2	3;2	3;2	Collagen alpha-3(IV) chain;Tumstatin	COL4A3	Collagen alpha-3(IV) chain;Isoform of Q01955, Isoform 2 of Collagen alpha-3(IV) chain	Core matrisome	Collagens	68387000	0	0	0	28977000	0	39410000		0	0	0	4	3	3	3	7	20				1006	354;455;698	True;True;True	372;477;736	3638;3639;3640;3641;3642;3643;4908;4909;4910;4911;4912;4913;4914;4915;4916;4917;4918;4919;7640	3828;3829;3830;3831;3832;3833;3834;5170;5171;5172;5173;5174;5175;5176;5177;5178;5179;5180;5181;8064	3832;5181;8064
P25940	P25940	4	4	4	Collagen alpha-3(V) chain	COL5A3	Collagen alpha-3(V) chain	Core matrisome	Collagens	0	0	0	0	0	0	0		0	5	1	1	2	1	2	2	14				796	24;68;2472;7384	True;True;True;True	25;72;2620;7916	200;201;202;203;204;205;639;29687;90863;90864;90865	206;207;208;209;210;211;659;31733;96772;96773;96774;96775;96776;96777	206;659;31733;96777	421	351
P12111-2;P12111;P12111-5;P12111-3;I3L392	P12111-2;P12111	146;146;61;57;3	146;146;61;57;3	6;6;6;6;0	Collagen alpha-3(VI) chain	COL6A3	Isoform of P12111, Isoform 2 of Collagen alpha-3(VI) chain;Collagen alpha-3(VI) chain	Core matrisome	Collagens	350195000000	62385000000	53004000000	32242000000	100040000000	60675000000	41849000000		367	559	335	681	400	549	379	499	3769				715	60;93;102;103;212;444;465;470;471;489;672;1255;1349;1543;1587;1696;1697;1890;2081;2084;2282;2298;2315;2351;2377;2571;2723;2793;2798;2800;2860;2861;2862;2863;2870;2911;2967;2976;3014;3126;3154;3155;3184;3201;3259;3661;3663;3711;3716;3785;3844;3845;4083;4117;4190;4407;4748;4750;4769;4772;4791;4824;4857;4935;4963;4989;4990;5123;5126;5329;5369;5418;5420;5495;5513;5514;5528;5583;5604;5612;5742;5783;58…	True;True;True;True;True;True;True;True;True;True;True;True;True;True;True;True;True;True;True;True;True;True;True;True;True;True;True;True;True;True;True;True;True;True;True;True;True;True;True;True;True;True;True;True;True;True;True;True;True;True;True;True;True;True;True;True;True;True;True;True;True;True;True;True;True;True;True;True;True;True;True;True;True;True;True;True;True;True;True;True…	62;63;98;108;109;224;466;487;492;493;512;710;1328;1427;1631;1677;1797;1798;2000;2203;2206;2413;2431;2449;2485;2513;2725;2894;2969;2975;2977;3044;3045;3046;3047;3048;3049;3056;3101;3102;3160;3169;3207;3321;3322;3356;3357;3388;3407;3466;3896;3898;3946;3951;4025;4090;4091;4345;4382;4459;4686;5038;5040;5061;5064;5087;5088;5124;5159;5247;5277;5303;5304;5444;5447;5687;5747;5748;5816;5818;5905;5924;5925…	483;484;485;486;487;488;489;490;491;492;493;494;495;496;497;498;499;500;501;502;503;504;505;506;507;508;509;510;511;512;513;514;515;516;517;518;519;520;521;836;837;838;839;840;841;842;843;844;845;846;847;848;849;850;851;958;959;960;961;962;963;964;965;966;967;968;969;970;971;972;973;974;975;976;977;978;979;980;981;982;983;984;985;986;987;988;989;990;991;992;993;994;995;996;997;998;999;1000;1001;1…	496;497;498;499;500;501;502;503;504;505;506;507;508;509;510;511;512;513;514;515;516;517;518;519;520;521;522;523;524;525;526;527;528;529;530;531;532;533;534;872;873;874;875;876;877;878;879;880;881;882;883;884;885;886;887;997;998;999;1000;1001;1002;1003;1004;1005;1006;1007;1008;1009;1010;1011;1012;1013;1014;1015;1016;1017;1018;1019;1020;1021;1022;1023;1024;1025;1026;1027;1028;1029;1030;1031;1032;10…	497;884;1051;1081;1995;4982;5289;5370;5390;5552;7710;17197;18289;20691;21438;22795;22829;24721;27330;27455;29393;29561;29736;30137;30482;32888;34483;35267;35404;35429;37688;37709;37743;37747;37904;38666;39894;40099;40545;41853;42415;42466;43798;44063;45571;51427;51472;51869;51938;52938;53851;53868;56773;57169;57956;60349;63932;63937;64281;64359;64757;65104;65476;66584;66913;67205;67284;68652;6868…	130;131;132;133;134;135;136;137;138;139;140;141;142	309;372;410;880;1704;1786;1795;1973;2215;2285;2302;2500;2604
E7ENL6;P12111-4	E7ENL6;P12111-4	137;137	1;1	0;0	Collagen alpha-3(VI) chain	COL6A3	Isoform of P12111, Collagen alpha-3(VI) chain;Isoform of P12111, Isoform 4 of Collagen alpha-3(VI) chain	Core matrisome	Collagens	218500000	0	0	0	218500000	0	0		1	1	1	2	1	1	1	1	9				290	60;93;102;103;444;465;470;471;489;672;1255;1349;1543;1587;1696;1697;1890;2081;2084;2282;2298;2315;2351;2377;2571;2723;2793;2798;2800;2860;2861;2862;2863;2870;2911;2967;2976;3014;3126;3154;3155;3184;3201;3259;3661;3663;3711;3716;3785;3844;3845;4083;4117;4190;4407;4748;4769;4772;4791;4824;4935;4963;4989;4990;5123;5126;5329;5369;5418;5420;5495;5513;5514;5528;5583;5604;5612;5742;5783;5862;6041;6076;6…	False;False;False;False;False;False;False;False;False;False;False;False;False;False;False;False;False;False;False;False;False;False;False;False;False;False;False;False;False;False;False;False;False;False;False;False;False;False;False;False;False;False;False;False;False;False;False;False;False;False;False;False;False;False;False;False;False;False;False;False;False;False;False;False;False;False;Fal…	62;63;98;108;109;466;487;492;493;512;710;1328;1427;1631;1677;1797;1798;2000;2203;2206;2413;2431;2449;2485;2513;2725;2894;2969;2975;2977;3044;3045;3046;3047;3048;3049;3056;3101;3102;3160;3169;3207;3321;3322;3356;3357;3388;3407;3466;3896;3898;3946;3951;4025;4090;4091;4345;4382;4459;4686;5038;5061;5064;5087;5088;5124;5247;5277;5303;5304;5444;5447;5687;5747;5748;5816;5818;5905;5924;5925;5940;5998;602…	483;484;485;486;487;488;489;490;491;492;493;494;495;496;497;498;499;500;501;502;503;504;505;506;507;508;509;510;511;512;513;514;515;516;517;518;519;520;521;836;837;838;839;840;841;842;843;844;845;846;847;848;849;850;851;958;959;960;961;962;963;964;965;966;967;968;969;970;971;972;973;974;975;976;977;978;979;980;981;982;983;984;985;986;987;988;989;990;991;992;993;994;995;996;997;998;999;1000;1001;1…	496;497;498;499;500;501;502;503;504;505;506;507;508;509;510;511;512;513;514;515;516;517;518;519;520;521;522;523;524;525;526;527;528;529;530;531;532;533;534;872;873;874;875;876;877;878;879;880;881;882;883;884;885;886;887;997;998;999;1000;1001;1002;1003;1004;1005;1006;1007;1008;1009;1010;1011;1012;1013;1014;1015;1016;1017;1018;1019;1020;1021;1022;1023;1024;1025;1026;1027;1028;1029;1030;1031;1032;10…	497;884;1051;1081;4982;5289;5370;5390;5552;7710;17197;18289;20691;21438;22795;22829;24721;27330;27455;29393;29561;29736;30137;30482;32888;34483;35267;35404;35429;37688;37709;37743;37747;37904;38666;39894;40099;40545;41853;42415;42466;43798;44063;45571;51427;51472;51869;51938;52938;53851;53868;56773;57169;57956;60349;63932;64281;64359;64757;65104;66584;66913;67205;67284;68652;68688;71411;71919;726…	130;131;132;133;134;135;136;137;138;139;140;141;142	108;171;209;479;1303;1385;1394;1572;1813;1883;1900;2098;2202
P53420	P53420	2	2	2	Collagen alpha-4(IV) chain	COL4A4	Collagen alpha-4(IV) chain	Core matrisome	Collagens	22965000	0	0	0	0	0	22965000		0	0	0	1	1	1	1	4	8				913	58;8839	True;True	60;9453	479;480;481;108388;108389;108390;108391;108392	492;493;494;115332;115333;115334;115335;115336	493;115333
P29400;P29400-2;H0Y9R8;H0Y998	P29400;P29400-2	10;10;2;1	8;8;2;1	8;8;2;1	Collagen alpha-5(IV) chain	COL4A5	Collagen alpha-5(IV) chain;Isoform of P29400, Isoform 2 of Collagen alpha-5(IV) chain	Core matrisome	Collagens	9640600000	2229300000	1552800000	1510000000	1213100000	1535500000	1599900000		20	28	16	22	39	24	17	25	191				813	351;353;2609;3235;3592;5457;6316;6317;6386;6634	False;True;True;True;True;True;True;True;True;False	369;371;2769;2770;2771;3442;3823;5864;5865;5866;6788;6789;6861;6862;7122	3411;3412;3413;3414;3415;3416;3417;3418;3419;3420;3421;3422;3423;3424;3425;3426;3427;3428;3429;3430;3431;3432;3433;3434;3435;3436;3437;3438;3439;3440;3441;3442;3443;3444;3445;3446;3447;3448;3449;3450;3451;3452;3453;3454;3455;3456;3457;3458;3459;3460;3461;3462;3463;3464;3465;3466;3467;3468;3469;3470;3471;3472;3473;3474;3475;3476;3477;3478;3479;3480;3481;3482;3483;3484;3485;3486;3487;3488;3489;3490…	3594;3595;3596;3597;3598;3599;3600;3601;3602;3603;3604;3605;3606;3607;3608;3609;3610;3611;3612;3613;3614;3615;3616;3617;3618;3619;3620;3621;3622;3623;3624;3625;3626;3627;3628;3629;3630;3631;3632;3633;3634;3635;3636;3637;3638;3639;3640;3641;3642;3643;3644;3645;3646;3647;3648;3649;3650;3651;3652;3653;3654;3655;3656;3657;3658;3659;3660;3661;3662;3663;3664;3665;3666;3667;3668;3669;3670;3671;3672;3673…	3666;3812;33491;45321;50697;73237;84260;84300;85060;88023	425;426;427;428;429	1516;1519;1545;1547;1549
A0A087WZY5;F5H851;A8MXH5;Q14031-2;Q14031;F5H3Q5	A0A087WZY5;F5H851;A8MXH5;Q14031-2;Q14031;F5H3Q5	10;10;10;10;10;9	10;10;10;10;10;9	10;10;10;10;10;9	Collagen alpha-6(IV) chain	COL4A6	Isoform of Q14031, Collagen alpha-6(IV) chain;Isoform of Q14031, Collagen alpha-6(IV) chain;Isoform of Q14031, Collagen alpha-6(IV) chain;Isoform of Q14031, Isoform B of Collagen alpha-6(IV) chain;Collagen alpha-6(IV) chain;Isoform of Q14031, Collagen alph	Core matrisome	Collagens	9629000000	2122700000	1704100000	1094500000	1276900000	1674900000	1755900000		34	45	29	40	47	37	40	40	312				46	361;751;1097;2605;2842;3314;6219;7202;8016;8838	True;True;True;True;True;True;True;True;True;True	379;790;1163;2761;2762;3023;3526;6682;7719;7720;8589;9452	3680;3681;3682;3683;3684;3685;3686;3687;3688;3689;3690;3691;3692;3693;3694;3695;3696;3697;3698;3699;3700;3701;3702;3703;3704;3705;3706;3707;3708;3709;3710;3711;3712;3713;3714;3715;3716;3717;3718;3719;3720;3721;3722;3723;3724;3725;3726;3727;8264;8265;8266;8267;8268;8269;8270;8271;8272;8273;8274;8275;8276;8277;8278;8279;8280;8281;8282;8283;8284;8285;8286;8287;8288;8289;8290;14453;14454;14455;14456;…	3871;3872;3873;3874;3875;3876;3877;3878;3879;3880;3881;3882;3883;3884;3885;3886;3887;3888;3889;3890;3891;3892;3893;3894;3895;3896;3897;3898;3899;3900;3901;3902;3903;3904;3905;3906;3907;3908;3909;3910;3911;3912;3913;3914;3915;3916;3917;3918;3919;3920;3921;3922;3923;3924;3925;3926;3927;3928;3929;3930;3931;3932;3933;8712;8713;8714;8715;8716;8717;8718;8719;8720;8721;8722;8723;8724;8725;8726;8727;8728…	3929;8719;15512;33345;36563;46496;82709;94627;104768;115315	18;19;20	1497;1528;1529
X6RLJ0;P02745	X6RLJ0;P02745	1;1	1;1	1;1	Complement C1q subcomponent subunit A	C1QA	Isoform of P02745, Complement C1q subcomponent subunit A (Fragment);Complement C1q subcomponent subunit A	Matrisome-associated	ECM-affiliated Proteins	7080300	0	0	0	7080300	0	0		1	2	0	2	2	1	0	2	10				613	1547	TRUE	1636	19559;19560;19561;19562;19563;19564;19565;19566;19567;19568	21015;21016;21017;21018;21019;21020;21021;21022;21023;21024	21017
A0A0A0MSV6;D6R934;P02746;D6RGJ1	A0A0A0MSV6;D6R934;P02746	5;5;5;1	5;5;5;1	5;5;5;1	Complement C1q subcomponent subunit B	C1QB	Isoform of P02746, Complement C1q subcomponent subunit B (Fragment);Isoform of P02746, Complement C1q subcomponent subunit B;Complement C1q subcomponent subunit B	Matrisome-associated	ECM-affiliated Proteins	206201000	0	44088000	62070000	25652000	40803000	33588000		0	7	2	6	6	4	2	4	31				79	3143;3633;4474;8252;8516	True;True;True;True;True	3344;3868;4757;8842;9121	39428;39429;39430;39431;39432;39433;39434;39435;39436;39437;39438;39439;47710;47711;47712;47713;47714;57121;57122;57123;57124;57125;57126;100964;100965;100966;100967;100968;100969;100970;104522	42175;42176;42177;42178;42179;42180;42181;42182;42183;42184;42185;42186;51126;51127;51128;51129;51130;61051;61052;61053;61054;61055;61056;107496;107497;107498;107499;107500;107501;107502;111267	42181;51126;61055;107502;111267	43;44	183;210
P02747	P02747	5	5	5	Complement C1q subcomponent subunit C	C1QC	Complement C1q subcomponent subunit C	Matrisome-associated	ECM-affiliated Proteins	169540000	0	43546000	0	40071000	53355000	32568000		1	2	1	4	7	10	3	5	33				614	2528;2561;6263;7546;8517	True;True;True;True;True	2680;2713;6732;8095;9122	30251;30252;30253;30254;30255;30655;30656;30657;30658;30659;30660;30661;30662;30663;78358;78359;92885;92886;92887;92888;104523;104524;104525;104526;104527;104528;104529;104530;104531;104532;104533;104534;104535;104536	32312;32313;32314;32315;32316;32735;32736;32737;32738;32739;32740;32741;32742;32743;83469;83470;98951;98952;98953;98954;111268;111269;111270;111271;111272;111273;111274;111275;111276;111277;111278;111279;111280;111281;111282	32312;32735;83469;98954;111280
Q9BXJ5	Q9BXJ5	3	3	2	Complement C1q tumor necrosis factor-related protein 2	C1QTNF2	Complement C1q tumor necrosis factor-related protein 2	Matrisome-associated	ECM-affiliated Proteins	0	0	0	0	0	0	0		2	1	0	1	2	1	0	3	10				1206	1330;3521;7335	True;True;True	1408;3744;7864	16964;46166;90339;90340;90341;90342;90343;90344;90345	18142;49467;96213;96214;96215;96216;96217;96218;96219;96220	18142;49467;96220
Q9BXJ0	Q9BXJ0	4	4	4	Complement C1q tumor necrosis factor-related protein 5	C1QTNF5	Complement C1q tumor necrosis factor-related protein 5	Matrisome-associated	ECM-affiliated Proteins	31803000	0	15813000	0	0	15990000	0		1	3	0	0	11	5	2	0	22				1205	693;5758;8196;8260	True;True;True;True	731;6191;6192;8781;8850	7585;7586;7587;7588;7589;7590;7591;7592;7593;7594;7595;7596;7597;72398;72399;72400;72401;72402;72403;100356;101088;101089;101090;101091;101092	8003;8004;8005;8006;8007;8008;8009;8010;8011;8012;8013;8014;8015;77154;77155;77156;77157;77158;77159;106854;107624;107625;107626;107627;107628	8015;77159;106854;107625	715	196
P01024;M0QYC8;M0R0Q9	P01024	49;4;3	49;4;3	44;3;3	Complement C3;Complement C3 beta chain;C3-beta-c;Complement C3 alpha chain;C3a anaphylatoxin;Acylation stimulating protein;Complement C3b alpha chain;Complement C3c alpha chain fragment 1;Complement C3dg fragment;Complement C3g fragment;Complement C3d fragment;Complement C3f fragment;Complement C3c alpha chain fragment 2	C3	Complement C3	non matrisome	non matrisome	5270870000	566860000	710960000	1117700000	555560000	1371900000	947890000		24	50	41	48	89	87	36	79	454				585	84;97;132;292;583;809;874;1259;1369;1581;1705;1809;2117;2309;2473;3439;3440;3567;3919;3920;4056;4080;4799;5018;5121;5468;5693;5887;5902;6088;6145;6214;6324;6523;6803;6973;7087;7201;7316;7393;7532;7935;7936;8029;8145;8349;8492;8499;8536	True;True;True;True;True;True;True;True;True;True;True;True;True;True;True;True;True;True;True;True;True;True;True;True;True;True;True;True;True;True;True;True;True;True;True;True;True;True;True;True;True;True;True;True;True;True;True;True;True	89;102;139;308;615;850;920;1333;1448;1671;1807;1917;2239;2442;2621;3658;3659;3793;4168;4169;4170;4171;4316;4342;5098;5332;5442;5877;6121;6323;6339;6542;6605;6606;6677;6796;7006;7298;7476;7594;7717;7718;7843;7925;8079;8507;8508;8602;8724;8941;9096;9103;9141	795;796;888;889;890;891;892;1407;2653;2654;2655;2656;2657;2658;2659;2660;2661;6376;6377;6378;6379;6380;6381;6382;6383;6384;6385;6386;6387;6388;6389;6390;6391;6392;8977;8978;8979;8980;8981;8982;8983;8984;8985;8986;8987;8988;9823;9824;16123;16124;16125;16126;16127;16128;16129;16130;16131;16132;16133;16134;16135;16136;16137;16138;16139;16140;16141;16142;16143;16144;16145;16146;16147;16148;16149;1615…	831;832;926;927;928;929;930;1479;2780;2781;2782;2783;2784;2785;2786;2787;2788;6735;6736;6737;6738;6739;6740;6741;6742;6743;6744;6745;6746;6747;6748;6749;6750;6751;9465;9466;9467;9468;9469;9470;9471;9472;9473;9474;9475;9476;10368;10369;17277;17278;17279;17280;17281;17282;17283;17284;17285;17286;17287;17288;17289;17290;17291;17292;17293;17294;17295;17296;17297;17298;17299;17300;17301;17302;17303;17…	831;927;1479;2785;6750;9470;10368;17292;18542;21357;23069;24268;27741;29671;31737;48324;48329;50028;54576;54612;56423;56758;64812;67733;68642;73302;76435;78801;78938;80784;81784;82654;84323;86514;89339;91349;92718;94607;95995;96886;98829;103612;103633;104892;106335;108925;110948;110978;111413	232;233;234;235;236	441;495;990;1129;1199
P0C0L4-2;P0C0L4	P0C0L4-2;P0C0L4	23;23	23;23	1;1	Complement C4-A;Complement C4 beta chain;Complement C4-A alpha chain;C4a anaphylatoxin;C4b-A;C4d-A;Complement C4 gamma chain	C4A	Isoform of P0C0L4, Isoform 2 of Complement C4-A;Complement C4-A	non matrisome	non matrisome	3746390000	758080000	715980000	565050000	589180000	626120000	491980000		13	33	17	32	37	37	12	29	210				692	126;192;215;447;556;663;1358;1608;1905;2407;3271;4459;4572;4914;5963;6107;6235;7324;7661;7960;8174;8297;8398	True;True;True;True;True;True;True;True;True;True;True;True;True;True;True;True;True;True;True;True;True;True;True	133;204;228;469;587;701;1437;1702;2015;2547;3478;4739;4857;5223;6403;6565;6701;7852;8217;8532;8754;8887;8991	1315;1316;1317;1318;1319;1320;1321;1322;1323;1324;1325;1326;1327;1328;1329;1330;1331;1332;1333;1334;1335;1784;1785;1922;1923;1924;1925;1926;1927;4816;4817;6020;6021;6022;6023;6024;6025;6026;6027;6028;6029;6030;6031;6032;6033;7245;7246;7247;7248;7249;7250;7251;7252;7253;7254;7255;7256;7257;17180;17181;17182;17183;17184;17185;17186;17187;17188;17189;17190;17191;17192;17193;17194;17195;17196;17197;2…	1380;1381;1382;1383;1384;1385;1386;1387;1388;1389;1390;1391;1392;1393;1394;1395;1396;1397;1398;1399;1400;1870;1871;2009;2010;2011;2012;2013;2014;2015;5075;5076;6326;6327;6328;6329;6330;6331;6332;6333;6334;6335;6336;6337;6338;6339;7631;7632;7633;7634;7635;7636;7637;7638;7639;7640;7641;7642;7643;7644;18373;18374;18375;18376;18377;18378;18379;18380;18381;18382;18383;18384;18385;18386;18387;18388;183…	1391;1871;2015;5075;6326;7643;18374;21709;24916;31035;45961;60739;61996;66290;79413;81051;82962;96064;100206;104061;106488;108303;109425
Q07021;I3L3Q7;I3L3B0	Q07021;I3L3Q7;I3L3B0	5;4;4	5;4;4	5;4;4	Complement component 1 Q subcomponent-binding protein, mitochondrial	C1QBP	Complement component 1 Q subcomponent-binding protein, mitochondrial;Isoform of Q07021, Complement component 1 Q subcomponent-binding protein, mitochondrial (Fragment);Isoform of Q07021, Complement component 1 Q subcomponent-binding protein, mitochondrial	Matrisome-associated	ECM-affiliated Proteins	349910000	0	178430000	0	171480000	0	0		1	4	6	8	0	1	0	0	20				1022	274;529;2300;5377;7877	True;True;True;True;True	289;554;2433;5760;8447	2402;2403;2404;2405;2406;2407;2408;2409;5670;27699;27700;27701;27702;67551;67552;67553;96681;96682;96683	2505;2506;2507;2508;2509;2510;2511;2512;5967;29621;29622;29623;29624;29625;72004;72005;72006;102999;103000;103001	2510;5967;29621;72004;103001	626	105
P13671	P13671	2	2	2	Complement component C6	C6	Complement component C6	non matrisome	non matrisome	0	0	0	0	0	0	0		0	0	0	0	1	0	0	0	1				731	1442;7355	True;True	1523;7887	17916;90582	19160;96469	19160;96469
P07360;Q5SQ08	P07360;Q5SQ08	3;2	3;2	3;2	Complement component C8 gamma chain	C8G	Complement component C8 gamma chain;Isoform of P07360, Complement component C8 gamma chain (Fragment)	non matrisome	non matrisome	15075500	0	0	0	7533600	7541900	0		0	1	0	1	3	4	1	3	13				669	4390;6191;6942	True;True;True	4668;6652;7444	56215;77196;77197;77198;77199;77200;77201;77202;77203;85469;85470;85471;85472;85473	60099;82243;82244;82245;82246;82247;82248;82249;82250;91022;91023;91024;91025;91026	60099;82250;91026
P02748;CON__Q3MHN2	P02748	15;3	15;3	15;3	Complement component C9;Complement component C9a;Complement component C9b	C9	Complement component C9	non matrisome	non matrisome	289776000	0	41525000	112300000	0	84188000	51763000		0	8	6	2	25	9	2	6	58				615	379;380;495;991;1552;1576;1698;2399;5037;5661;6518;6846;7304;7630;8466	True;True;True;True;True;True;True;True;True;True;True;True;True;True;True	397;398;519;1045;1641;1666;1799;2536;5353;6085;7001;7344;7830;8181;9067	3954;3955;3956;3957;3958;3959;3960;3961;5375;5376;5377;5378;5379;5380;5381;5382;12059;12060;19578;19579;19865;21305;21306;28815;63643;63644;63645;63646;63647;63648;63649;63650;63651;63652;63653;63654;63655;63656;63657;63658;63659;63660;71416;81214;81215;84502;84503;90045;90046;90047;93758;103687;103688;103689;103690;103691;103692;103693;103694	4175;4176;4177;4178;4179;4180;4181;4182;4183;5667;5668;5669;5670;5671;5672;5673;5674;12752;12753;21034;21035;21338;22842;22843;30789;67884;67885;67886;67887;67888;67889;67890;67891;67892;67893;67894;67895;67896;67897;67898;67899;67900;67901;67902;76088;86486;86487;90027;90028;95905;95906;95907;99888;110405;110406;110407;110408;110409;110410;110411;110412	4178;4181;5668;12753;21034;21338;22842;30789;67901;76088;86487;90028;95907;99888;110405
B1AP13;P08174-2;H3BLV0;H7BY55;P08174-4;P08174;P08174-3;P08174-5;P08174-6;P08174-7;B1AP15;Q8TDW7-2	B1AP13;P08174-2;H3BLV0;H7BY55;P08174-4;P08174;P08174-3;P08174-5;P08174-6;P08174-7	23;18;13;13;13;13;13;13;13;13;7;1	23;18;13;13;13;13;13;13;13;13;7;1	23;18;13;13;13;13;13;13;13;13;7;1	Complement decay-accelerating factor	CD55	Isoform of P08174, Complement decay-accelerating factor;Isoform of P08174, Isoform 1 of Complement decay-accelerating factor;Isoform of P08174, Complement decay-accelerating factor (Fragment);Isoform of P08174, Complement decay-accelerating factor;Isoform	non matrisome	non matrisome	8704550000	775210000	3505400000	1021800000	1324400000	1155400000	922340000		10	69	14	37	42	32	27	29	260				167	936;1564;1565;1612;2021;2464;2933;3767;3768;4767;5066;5968;6216;6254;6361;6659;6660;6664;6762;7086;7623;8564;8607	True;True;True;True;True;True;True;True;True;True;True;True;True;True;True;True;True;True;True;True;True;True;True	987;1653;1654;1707;2141;2611;3124;4005;4006;5058;5059;5383;6409;6679;6721;6833;7149;7150;7156;7256;7593;8174;9169;9212	10998;10999;11000;11001;11002;11003;11004;11005;19695;19696;19697;19698;19699;19700;19701;19702;19703;19704;19705;19706;19707;20276;20277;20278;25147;25148;25149;25150;25151;25152;25153;25154;25155;25156;25157;25158;25159;25160;25161;25162;25163;25164;25165;25166;25167;25168;25169;25170;25171;25172;25173;25174;25175;25176;25177;25178;25179;25180;25181;25182;25183;25184;29639;36876;36877;49220;492…	11621;11622;11623;11624;11625;11626;11627;11628;21155;21156;21157;21158;21159;21160;21161;21162;21163;21164;21165;21166;21167;21775;21776;21777;26950;26951;26952;26953;26954;26955;26956;26957;26958;26959;26960;26961;26962;26963;26964;26965;26966;26967;26968;26969;26970;26971;26972;26973;26974;26975;26976;26977;26978;26979;26980;26981;26982;26983;26984;26985;26986;26987;26988;26989;26990;26991;269…	11623;21163;21166;21775;26958;31685;39469;52748;52761;64257;68125;79435;82680;83223;84853;88273;88282;88340;89020;92712;99820;111544;112113
E7ETN3;B4E1Z4;P00751;A0A0G2JH38;P00751-2;H7C5H1	E7ETN3;B4E1Z4;P00751;A0A0G2JH38;P00751-2	4;4;4;3;3;1	4;4;4;3;3;1	4;4;4;3;3;1	Complement factor B;Complement factor B Ba fragment;Complement factor B Bb fragment	CFB	Isoform of B4E1Z4, Uncharacterized protein;Uncharacterized protein;Complement factor B;Isoform of P00751, Complement factor B (Fragment);Isoform of P00751, Isoform 2 of Complement factor B	non matrisome	non matrisome	16393000	0	0	0	0	0	16393000		0	1	0	1	1	2	0	3	8				183	1019;1850;4434;8334	True;True;True;True	1076;1959;4713;8925	12848;22863;22864;22865;22866;22867;56597;102090	13589;24483;24484;24485;24486;24487;60494;108720	13589;24486;60494;108720
K7ERG9;P00746	K7ERG9;P00746	2;2	2;2	2;2	Complement factor D	CFD	Isoform of P00746, Complement factor D;Complement factor D	non matrisome	non matrisome	9488600	0	9488600	0	0	0	0		0	2	0	0	1	1	0	1	5				479	746;7786	True;True	785;8351	8208;8209;8210;8211;95675	8655;8656;8657;8658;101929	8658;101929
P08603;A0A0D9SG88;P08603-2;Q5TFM2;A0A087WYK9;Q6NSD3;Q02985-2;Q02985	P08603;A0A0D9SG88;P08603-2	34;17;17;13;1;1;1;1	34;17;17;13;1;1;1;1	31;17;17;13;1;1;1;1	Complement factor H	CFH	Complement factor H;Isoform of P08603, Complement factor H;Isoform of P08603, Isoform 2 of Complement factor H	non matrisome	non matrisome	2314930000	465160000	547910000	299510000	290110000	411880000	300360000		24	88	18	43	71	58	25	44	371				682	294;635;844;955;1009;1109;1354;1650;1788;1872;1876;1956;1999;2645;2877;3577;3723;4187;5062;5448;5504;5688;5770;6519;6656;6657;6843;6911;6984;7089;7377;7383;8379;8600	True;True;True;True;True;True;True;True;True;True;True;True;True;True;True;True;True;True;True;True;True;True;True;True;True;True;True;True;True;True;True;True;True;True	310;671;886;1008;1066;1178;1433;1745;1895;1982;1986;2066;2115;2116;2809;3064;3805;3958;4455;4456;5379;5850;5914;6116;6204;7002;7146;7147;7341;7411;7412;7487;7596;7909;7915;8971;9205	2665;2666;2667;2668;2669;2670;2671;2672;2673;6913;6914;6915;9327;9328;11295;11296;11297;11298;11299;11300;11301;11302;11303;11304;11305;11306;11307;11308;11309;11310;12664;12665;12666;12667;12668;12669;12670;12671;12672;12673;12674;12675;12676;12677;12678;12679;12680;12681;12682;12683;12684;12685;12686;12687;12688;12689;14592;14593;14594;14595;14596;14597;17132;17133;17134;17135;17136;17137;20723…	2792;2793;2794;2795;2796;2797;2798;2799;2800;2801;7288;7289;7290;9827;9828;11943;11944;11945;11946;11947;11948;11949;11950;11951;11952;11953;11954;11955;11956;11957;11958;11959;11960;13390;13391;13392;13393;13394;13395;13396;13397;13398;13399;13400;13401;13402;13403;13404;13405;13406;13407;13408;13409;13410;13411;13412;13413;13414;13415;13416;13417;13418;15622;15623;15624;15625;15626;15627;18325;…	2795;7289;9828;11944;13402;15624;18328;22235;23940;24581;24606;25653;26430;33816;38018;50150;52021;57944;68049;73090;73718;76379;77270;86490;88255;88259;90001;90830;91437;92733;96724;96760;109119;112059	332;333;334	64;162;1174
Q03591;B1AKG0;V9GYE7;P36980-2;P36980	Q03591;B1AKG0	7;6;2;2;2	4;3;1;1;1	3;2;1;1;1	Complement factor H-related protein 1	CFHR1	Complement factor H-related protein 1;Isoform of Q03591, Complement factor H-related protein 1	non matrisome	non matrisome	0	0	0	0	0	0	0		0	2	1	0	5	2	0	2	12				1014	1009;1999;3969;4114;5504;7104;7382	False;False;True;True;False;True;True	1066;2115;2116;4224;4377;5914;7611;7914	12664;12665;12666;12667;12668;12669;12670;12671;12672;12673;12674;12675;12676;12677;12678;12679;12680;12681;12682;12683;12684;12685;12686;12687;12688;12689;24647;24648;24649;24650;24651;24652;24653;24654;24655;24656;24657;24658;24659;24660;24661;24662;24663;24664;24665;24666;24667;24668;24669;24670;24671;24672;24673;24674;24675;24676;24677;24678;24679;24680;24681;24682;24683;24684;24685;24686;246…	13390;13391;13392;13393;13394;13395;13396;13397;13398;13399;13400;13401;13402;13403;13404;13405;13406;13407;13408;13409;13410;13411;13412;13413;13414;13415;13416;13417;13418;26406;26407;26408;26409;26410;26411;26412;26413;26414;26415;26416;26417;26418;26419;26420;26421;26422;26423;26424;26425;26426;26427;26428;26429;26430;26431;26432;26433;26434;26435;26436;26437;26438;26439;26440;26441;26442;264…	13402;26430;55358;57123;73718;92936;96759	332	273
Q9BXR6	Q9BXR6	5	4	4	Complement factor H-related protein 5	CFHR5	Complement factor H-related protein 5	non matrisome	non matrisome	0	0	0	0	0	0	0		0	1	1	0	4	0	0	0	6				1209	545;3409;4114;4919;7376	True;True;False;True;True	575;3627;4377;5229;7908	5945;44727;44728;53370;53371;53372;53373;53374;53375;53376;53377;53378;62252;62253;90811	6246;47906;47907;57122;57123;57124;57125;57126;57127;57128;57129;57130;66427;66428;96720	6246;47907;57123;66428;96720
P29279-2;P29279	P29279-2;P29279	2;2	2;2	2;2	Connective tissue growth factor	CTGF	Isoform of P29279, Isoform 2 of Connective tissue growth factor;Connective tissue growth factor	Core matrisome	ECM Glycoproteins	9909400	0	0	0	0	0	9909400		0	1	0	2	3	2	2	3	13				812	7670;8429	True;True	8227;9026	94221;94222;94223;94224;94225;94226;94227;94228;94229;94230;94231;94232;103077	100373;100374;100375;100376;100377;100378;100379;100380;100381;100382;100383;100384;109768	100384;109768
J3QL22;J3QS85;J3KTQ1;J3QKR0;C9JLV5;Q9UNS2	J3QL22;J3QS85;J3KTQ1;J3QKR0;C9JLV5;Q9UNS2	1;1;1;1;1;1	1;1;1;1;1;1	1;1;1;1;1;1	COP9 signalosome complex subunit 3	COPS3	Isoform of Q9UNS2, COP9 signalosome complex subunit 3;Isoform of Q9UNS2, COP9 signalosome complex subunit 3;Isoform of Q9UNS2, COP9 signalosome complex subunit 3;Isoform of Q9UNS2, COP9 signalosome complex subunit 3;Isoform of Q9UNS2, COP9 signalosome comp	non matrisome	non matrisome	1581700	0	1581700	0	0	0	0		0	2	0	0	0	0	0	0	2				221	667	TRUE	705	7277	7664;7665	7664
O75131;E7ENV7;Q86YQ8-2;Q9HCH3-2;Q96FN4-2;Q96FN4;Q8IYJ1;Q96A23;O95741;Q9UBL6-2;Q86YQ8;Q96A23-2;Q9HCH3;O95741-2;Q9UBL6	O75131;E7ENV7;Q86YQ8-2;Q9HCH3-2;Q96FN4-2;Q96FN4;Q8IYJ1;Q96A23;O95741;Q9UBL6-2;Q86YQ8;Q96A23-2;Q9HCH3;O95741-2;Q9UBL6	2;1;1;1;1;1;1;1;1;1;1;1;1;1;1	2;1;1;1;1;1;1;1;1;1;1;1;1;1;1	2;1;1;1;1;1;1;1;1;1;1;1;1;1;1	Copine-3;Copine-8;Copine-5;Copine-2;Copine-9;Copine-4;Copine-6;Copine-7	CPNE3;CPNE8;CPNE5;CPNE2;CPNE9;CPNE4;CPNE6;CPNE7	Copine-3;Isoform of Q86YQ8, Copine-8;Isoform of Q86YQ8, Isoform 2 of Copine-8;Isoform of Q9HCH3, Isoform 2 of Copine-5;Isoform of Q96FN4, Isoform 2 of Copine-2;Copine-2;Copine-9;Copine-4;Copine-6;Isoform of Q9UBL6, Isoform 2 of Copine-7;Copine-8;Isoform of	non matrisome	non matrisome	0	0	0	0	0	0	0		1	5	0	3	4	4	1	3	21				539	1405;5231	True;True	1485;5554	17619;17620;17621;17622;17623;17624;17625;17626;17627;17628;17629;17630;17631;17632;17633;17634;17635;17636;17637;17638;65657;65658	18853;18854;18855;18856;18857;18858;18859;18860;18861;18862;18863;18864;18865;18866;18867;18868;18869;18870;18871;18872;69984;69985	18856;69985
O75367-3;O75367;O75367-2;B4DJC3;D6RCF2;Q9P0M6;Q5SQT3	O75367-3;O75367;O75367-2;B4DJC3	11;11;10;6;3;2;1	11;11;10;6;3;2;1	11;11;10;6;3;2;1	Core histone macro-H2A.1;Histone H2A	H2AFY	Isoform of O75367, Isoform 3 of Core histone macro-H2A.1;Core histone macro-H2A.1;Isoform of O75367, Isoform 1 of Core histone macro-H2A.1;Isoform of O75367, Histone H2A	histone	non matrisome	145959000	0	83732000	0	62227000	0	0		0	18	4	17	0	0	0	0	39				544	69;338;404;1227;2658;3392;3513;5437;6257;6834;6908	True;True;True;True;True;True;True;True;True;True;True	73;356;423;1299;2823;3610;3736;5837;6724;7332;7408	640;641;642;643;3141;3142;3143;3144;3145;3146;4174;4175;15778;31799;44510;44511;44512;44513;44514;44515;44516;46108;46109;46110;46111;46112;46113;68337;68338;68339;78216;78217;78218;78219;78220;78221;84371;85262	660;661;662;663;3293;3294;3295;3296;3297;3298;4401;4402;16902;33931;47655;47656;47657;47658;47659;47660;47661;49408;49409;49410;49411;49412;49413;72846;72847;72848;72849;83322;83323;83324;83325;83326;83327;89889;90811	660;3293;4401;16902;33931;47655;49408;72847;83323;89889;90811
Q9ULV4;Q9ULV4-2;Q9ULV4-3;F8W1H8;F8VUX3;F8VSA4;F8VRE9;F8VTT6;F8VVB7;B4E3S0;F8VV53;H0YHL7	Q9ULV4;Q9ULV4-2;Q9ULV4-3;F8W1H8;F8VUX3;F8VSA4;F8VRE9;F8VTT6;F8VVB7;B4E3S0	5;5;5;3;3;3;3;3;3;3;1;1	5;5;5;3;3;3;3;3;3;3;1;1	5;5;5;3;3;3;3;3;3;3;1;1	Coronin-1C;Coronin	CORO1C	Coronin-1C;Isoform of Q9ULV4, Isoform 2 of Coronin-1C;Isoform of Q9ULV4, Isoform 3 of Coronin-1C;Isoform of Q9ULV4, Coronin (Fragment);Isoform of Q9ULV4, Coronin;Isoform of Q9ULV4, Coronin (Fragment);Isoform of Q9ULV4, Coronin (Fragment);Isoform of Q9ULV4,	non matrisome	non matrisome	23146000	0	10773000	0	0	0	12373000		0	5	0	3	0	0	0	4	12				1258	383;2566;5419;7981;8452	True;True;True;True;True	401;2720;5817;8553;9050	3983;3984;30705;30706;30707;68177;68178;68179;97934;97935;103332;103333;103334;103335	4205;4206;32787;32788;32789;72680;72681;72682;104319;104320;110039;110040;110041;110042	4205;32789;72681;104320;110039
P12277;G3V4N7;H0YJG0;G3V461	P12277;G3V4N7;H0YJG0	4;3;2;1	4;3;2;1	3;2;1;1	Creatine kinase B-type	CKB	Creatine kinase B-type;Isoform of P12277, Creatine kinase B-type (Fragment);Isoform of P12277, Creatine kinase B-type (Fragment)	non matrisome	non matrisome	44796000	0	0	0	16711000	0	28085000		2	3	1	4	1	1	1	9	22				719	1437;4343;4710;5964	True;True;True;True	1518;4617;5000;6404;6405	17835;17836;17837;17838;17839;55471;55472;55473;59434;59435;59436;59437;74545;74546;74547;74548;74549;74550;74551;74552;74553;74554	19076;19077;19078;19079;19080;59316;59317;59318;63474;63475;63476;63477;79416;79417;79418;79419;79420;79421;79422;79423;79424;79425	19079;59316;63477;79417	309	207
P06732	P06732	3	2	2	Creatine kinase M-type;Creatine kinase M-type, N-terminally processed	CKM	Creatine kinase M-type	non matrisome	non matrisome	4289900	4289900	0	0	0	0	0		1	1	0	0	0	0	0	0	2				660	2396;5057;5964	True;True;False	2533;5374;6404;6405	28805;63796;74545;74546;74547;74548;74549;74550;74551;74552;74553;74554	30779;68038;79416;79417;79418;79419;79420;79421;79422;79423;79424;79425	30779;68038;79417	309	207
P12532;P12532-2;F8WCN3;C9JSQ1;P17540	P12532;P12532-2;F8WCN3;C9JSQ1	4;4;3;2;1	4;4;3;2;1	4;4;3;2;1	Creatine kinase U-type, mitochondrial	CKMT1A;CKMT1B	Creatine kinase U-type, mitochondrial;Isoform of P12532, Isoform 2 of Creatine kinase U-type, mitochondrial;Isoform of P12532, Creatine kinase U-type, mitochondrial;Isoform of P12532, Creatine kinase U-type, mitochondrial (Fragment)	non matrisome	non matrisome	67838000	0	29022000	0	38816000	0	0		0	5	0	6	0	0	0	0	11				720	4591;5002;5965;8524	True;True;True;True	4878;5316;6406;9129	58228;58229;63160;63161;63162;63163;74555;104573;104574;104575;104576;104577;104578;104579	62224;62225;67387;67388;67389;67390;79426;111322;111323;111324;111325;111326;111327;111328	62225;67388;79426;111324
Q5SQP8;P56545;P56545-2	Q5SQP8;P56545;P56545-2	1;1;1	1;1;1	1;1;1	C-terminal-binding protein 2	CTBP2	Isoform of P56545, C-terminal-binding protein 2;C-terminal-binding protein 2;Isoform of P56545, Isoform 2 of C-terminal-binding protein 2	non matrisome	non matrisome	3984500	0	0	0	3984500	0	0		0	0	0	1	0	0	0	0	1				923	1416	TRUE	1496	17748	18985	18985
A0A0C4DGX4;Q13616	A0A0C4DGX4;Q13616	1;1	1;1	1;1	Cullin-1	CUL1	Isoform of Q13616, Cullin-1;Cullin-1	non matrisome	non matrisome	0	0	0	0	0	0	0		0	0	0	1	0	0	0	0	1				105	1303	TRUE	1381	16597	17769	17769
Q86VP6;A0A0C4DGH5;Q86VP6-2	Q86VP6;A0A0C4DGH5;Q86VP6-2	2;1;1	2;1;1	2;1;1	Cullin-associated NEDD8-dissociated protein 1	CAND1	Cullin-associated NEDD8-dissociated protein 1;Isoform of Q86VP6, Cullin-associated NEDD8-dissociated protein 1 (Fragment);Isoform of Q86VP6, Isoform 2 of Cullin-associated NEDD8-dissociated protein 1	non matrisome	non matrisome	0	0	0	0	0	0	0		0	1	0	2	0	0	0	0	3				1137	4580;8075	True;True	4866;8652	58097;98959;98960	62086;105403;105404	62086;105404
O43927	O43927	6	6	6	C-X-C motif chemokine 13	CXCL13	C-X-C motif chemokine 13	Matrisome-associated	Secreted Factors	0	0	0	0	0	0	0		0	0	0	0	19	0	0	0	19				529	1137;1138;2461;6549;6875;7097	True;True;True;True;True;True	1206;1207;2608;7034;7375;7604	14900;14901;14902;14903;14904;14905;14906;14907;29614;29615;29616;81463;81464;81465;84836;84837;84838;84839;84840;87198;87199;87200	15974;15975;15976;15977;15978;15979;15980;15981;31660;31661;31662;86738;86739;86740;90375;90376;90377;90378;90379;92854;92855;92856	15976;15981;31662;86739;90377;92854
A0A0C4DGC1;O95715	A0A0C4DGC1;O95715	1;1	1;1	1;1	C-X-C motif chemokine 14	CXCL14	Isoform of O95715, C-X-C motif chemokine 14;C-X-C motif chemokine 14	Matrisome-associated	Secreted Factors	0	0	0	0	0	0	0		0	1	1	1	7	3	0	1	14	+			100	5399	TRUE	5790	67867;67868;67869;67870;67871;67872;67873;67874;67875;67876;67877;67878;67879;67880	72341;72342;72343;72344;72345;72346;72347;72348;72349;72350;72351;72352;72353;72354	72352	51	55
P01040;C9J0E4	P01040;C9J0E4	5;4	5;4	5;4	Cystatin-A;Cystatin-A, N-terminally processed	CSTA	Cystatin-A;Isoform of P01040, Cystatin-A	Matrisome-associated	ECM Regulators	276556000	78321000	31155000	55330000	34086000	40795000	36869000		3	6	2	7	2	7	5	6	38				587	3987;4428;5764;6941;7600	True;True;True;True;True	4243;4707;6198;7443;8150	51909;56583;56584;56585;56586;56587;56588;72429;72430;72431;72432;72433;72434;72435;72436;72437;72438;72439;72440;85455;85456;85457;85458;85459;85460;85461;85462;85463;85464;85465;85466;85467;85468;93355;93356;93357;93358;93359;93360	55570;60479;60480;60481;60482;60483;60484;77186;77187;77188;77189;77190;77191;77192;77193;77194;77195;77196;77197;91008;91009;91010;91011;91012;91013;91014;91015;91016;91017;91018;91019;91020;91021;99472;99473;99474;99475;99476;99477	55570;60479;77189;91020;99473
P04080	P04080	1	1	1	Cystatin-B	CSTB	Cystatin-B	Matrisome-associated	ECM Regulators	0	0	0	0	0	0	0		0	0	0	1	2	0	0	0	3				629	8033	TRUE	8606	98562;98563;98564;98565;98566	104990;104991;104992;104993;104994	104990
P01034	P01034	1	1	1	Cystatin-C	CST3	Cystatin-C	Matrisome-associated	ECM Regulators	15172000	0	15172000	0	0	0	0		1	3	0	2	2	2	2	2	14				586	428	TRUE	449	4594;4595;4596;4597;4598;4599;4600;4601;4602;4603;4604;4605;4606;4607	4846;4847;4848;4849;4850;4851;4852;4853;4854;4855;4856;4857;4858;4859	4853
P21291;E9PS42;E9PND2;E9PP21	P21291;E9PS42;E9PND2;E9PP21	7;5;4;4	7;5;4;4	7;5;4;4	Cysteine and glycine-rich protein 1	CSRP1	Cysteine and glycine-rich protein 1;Isoform of P21291, Cysteine and glycine-rich protein 1;Isoform of P21291, Cysteine and glycine-rich protein 1 (Fragment);Isoform of P21291, Cysteine and glycine-rich protein 1	non matrisome	non matrisome	5228690000	818350000	573190000	494960000	1357400000	480190000	1504600000		14	19	18	32	23	16	13	27	162				768	1093;2891;3062;3463;5549;6661;7717	True;True;True;True;True;True;True	1159;3080;3257;3682;5961;7151;7152;8277	14364;14365;14366;14367;14368;14369;14370;35775;35776;35777;35778;35779;35780;35781;35782;35783;35784;35785;35786;35787;35788;35789;35790;35791;35792;35793;35794;35795;35796;38407;38408;38409;38410;38411;38412;38413;38414;38415;38416;38417;38418;38419;38420;38421;38422;45454;45455;45456;45457;45458;45459;45460;69750;69751;69752;69753;69754;69755;69756;69757;69758;69759;69760;69761;69762;69763;697…	15366;15367;15368;15369;15370;15371;15372;38236;38237;38238;38239;38240;38241;38242;38243;38244;38245;38246;38247;38248;38249;38250;38251;38252;38253;38254;38255;38256;38257;41096;41097;41098;41099;41100;41101;41102;41103;41104;41105;41106;41107;41108;41109;41110;41111;48675;48676;48677;48678;48679;48680;48681;74364;74365;74366;74367;74368;74369;74370;74371;74372;74373;74374;74375;74376;74377;743…	15368;38236;41098;48676;74377;88284;101026	392	38
F8VQR7;F8VW96;Q16527	F8VQR7;F8VW96;Q16527	2;2;2	2;2;2	2;2;2	Cysteine and glycine-rich protein 2	CSRP2	Isoform of Q16527, Cysteine and glycine-rich protein 2;Isoform of Q16527, Cysteine and glycine-rich protein 2;Cysteine and glycine-rich protein 2	non matrisome	non matrisome	0	0	0	0	0	0	0		0	0	0	1	2	0	0	0	3				365	5548;7718	True;True	5960;8278	69749;94843;94844	74363;101044;101045	74363;101045
P50238;K4DIB9;H3BRQ4	P50238;K4DIB9;H3BRQ4	2;1;1	2;1;1	2;1;1	Cysteine-rich protein 1	CRIP1	Cysteine-rich protein 1;Isoform of H3BRQ4, Uncharacterized protein (Fragment);Uncharacterized protein (Fragment)	non matrisome	non matrisome	17070000	0	0	0	17070000	0	0		0	3	0	2	2	1	0	1	9				889	2314;5976	True;True	2448;6417	27802;27803;27804;27805;27806;27807;27808;27809;74610	29726;29727;29728;29729;29730;29731;29732;29733;79481	29727;79481
H0YFA4;P52943;P52943-2;H0YHD8	H0YFA4;P52943;P52943-2;H0YHD8	6;6;6;3	6;6;6;3	6;6;6;3	Cysteine-rich protein 2	CRIP2	Isoform of P52943, Cysteine-rich protein 2 (Fragment);Cysteine-rich protein 2;Isoform of P52943, Isoform 2 of Cysteine-rich protein 2;Isoform of P52943, Cysteine-rich protein 2 (Fragment)	non matrisome	non matrisome	486404000	149100000	71360000	0	145950000	52737000	67257000		5	11	0	18	13	6	2	7	62				408	710;3376;3381;5776;5852;7516	True;True;True;True;True;True	748;3593;3598;6210;6287;8059	7820;7821;7822;44312;44313;44314;44315;44316;44317;44318;44319;44320;44321;44322;44339;44340;44341;72574;72575;72576;72577;72578;72579;72580;72581;72582;72583;72584;72585;72586;72587;73569;73570;73571;73572;73573;73574;73575;73576;73577;73578;73579;73580;73581;73582;73583;73584;73585;73586;73587;73588;73589;73590;73591;73592;73593;73594;73595;73596;92674	8245;8246;8247;47420;47421;47422;47423;47424;47425;47426;47427;47428;47429;47430;47447;47448;47449;77341;77342;77343;77344;77345;77346;77347;77348;77349;77350;77351;77352;77353;77354;78385;78386;78387;78388;78389;78390;78391;78392;78393;78394;78395;78396;78397;78398;78399;78400;78401;78402;78403;78404;78405;78406;78407;78408;78409;78410;78411;78412;78413;78414;78415;98734;98735	8246;47428;47449;77344;78392;98734
H3BRG4;P22695;H3BSJ9	H3BRG4;P22695;H3BSJ9	2;2;1	2;2;1	2;2;1	Cytochrome b-c1 complex subunit 2, mitochondrial	UQCRC2	Isoform of P22695, Cytochrome b-c1 complex subunit 2, mitochondrial;Cytochrome b-c1 complex subunit 2, mitochondrial;Isoform of P22695, Cytochrome b-c1 complex subunit 2, mitochondrial	non matrisome	non matrisome	5868300	0	0	0	5868300	0	0		0	2	0	1	0	0	0	0	3				430	5262;7429	True;True	5587;7962	66022;66023;91475	70368;70369;97472	70368;97472
C9JFR7;P99999;CON__P62894	C9JFR7;P99999	3;3;1	3;3;1	3;3;1	Cytochrome c	CYCS	Isoform of P99999, Cytochrome c (Fragment);Cytochrome c	non matrisome	non matrisome	29057000	0	29057000	0	0	0	0		0	5	0	3	0	0	0	0	8				214	139;7398;7400	True;True;True	149;7931;7933	1490;1491;1492;1493;1494;1495;91099;91108	1565;1566;1567;1568;1569;1570;97061;97070	1565;97061;97070
P13073;H3BN72;H3BNV9;H3BNI5;Q86WV2;H3BPG0	P13073;H3BN72;H3BNV9	3;2;2;1;1;1	3;2;2;1;1;1	3;2;2;1;1;1	Cytochrome c oxidase subunit 4 isoform 1, mitochondrial	COX4I1	Cytochrome c oxidase subunit 4 isoform 1, mitochondrial;Isoform of P13073, Cytochrome c oxidase subunit 4 isoform 1, mitochondrial;Isoform of P13073, Cytochrome c oxidase subunit 4 isoform 1, mitochondrial	non matrisome	non matrisome	3019400	0	0	0	3019400	0	0		0	0	0	3	0	0	0	0	3				727	2206;6714;8231	True;True;True	2333;7208;8820	26858;83333;100734	28762;88748;107243	28762;88748;107243
H3BRM5;H3BV69;H3BNX8;P20674	H3BRM5;H3BV69;H3BNX8;P20674	2;2;2;2	2;2;2;2	2;2;2;2	Cytochrome c oxidase subunit 5A, mitochondrial	COX5A	Isoform of P20674, Cytochrome c oxidase subunit 5A, mitochondrial;Isoform of P20674, Cytochrome c oxidase subunit 5A, mitochondrial;Isoform of P20674, Cytochrome c oxidase subunit 5A, mitochondrial;Cytochrome c oxidase subunit 5A, mitochondrial	non matrisome	non matrisome	5413200	0	0	0	5413200	0	0		0	3	0	2	0	0	0	0	5				427	3842;4813	True;True	4088;5113	50279;50280;60858;60859;60860	53846;53847;64951;64952;64953	53847;64953
P10606	P10606	2	2	2	Cytochrome c oxidase subunit 5B, mitochondrial	COX5B	Cytochrome c oxidase subunit 5B, mitochondrial	non matrisome	non matrisome	9994100	0	0	0	9994100	0	0		0	0	0	2	0	0	0	0	2				698	3052;5180	True;True	3246;5501	38144;65016	40828;69302	40828;69302
O00483	O00483	1	1	1	Cytochrome c oxidase subunit NDUFA4	NDUFA4	Cytochrome c oxidase subunit NDUFA4	non matrisome	non matrisome	7114000	0	7114000	0	0	0	0		0	2	0	0	0	0	0	0	2				497	4311	TRUE	4584	55193;55194	59029;59030	59029
O75462;M0QZL6	O75462	5;2	5;2	5;2	Cytokine receptor-like factor 1	CRLF1	Cytokine receptor-like factor 1	Matrisome-associated	Secreted Factors	51709000	0	0	51709000	0	0	0		0	5	2	2	6	4	1	0	20				545	3451;5827;6078;6749;7974	True;True;True;True;True	3670;6262;6531;7243;8546	45219;45220;73297;75805;83529;83530;83531;97828;97829;97830;97831;97832;97833;97834;97835;97836;97837;97838;97839;97840	48428;48429;78095;80731;88957;88958;88959;104206;104207;104208;104209;104210;104211;104212;104213;104214;104215;104216;104217;104218	48429;78095;80731;88957;104216
Q14204	Q14204	6	6	6	Cytoplasmic dynein 1 heavy chain 1	DYNC1H1	Cytoplasmic dynein 1 heavy chain 1	non matrisome	non matrisome	4938000	0	0	0	4938000	0	0		0	0	0	5	0	1	0	0	6				1058	2253;5692;6864;6929;7002;7357	True;True;True;True;True;True	2381;6120;7364;7430;7506;7889	27327;71732;71733;71734;84724;85368;86024;90597	29239;76429;76430;76431;90261;90920;91599;96485	29239;76431;90261;90920;91599;96485
Q14008-2;Q14008;Q14008-3;E9PQH5	Q14008-2;Q14008;Q14008-3	4;4;4;1	4;4;4;1	4;4;4;1	Cytoskeleton-associated protein 5	CKAP5	Isoform of Q14008, Isoform 2 of Cytoskeleton-associated protein 5;Cytoskeleton-associated protein 5;Isoform of Q14008, Isoform 3 of Cytoskeleton-associated protein 5	non matrisome	non matrisome	0	0	0	0	0	0	0		0	1	0	3	0	0	0	0	4				1053	2469;2816;5416;7616	True;True;True;True	2617;2995;5814;8167	29675;33921;68173;93622	31721;36184;72676;99748	31721;36184;72676;99748
O43175;Q5SZU1	O43175;Q5SZU1	11;8	11;8	11;8	D-3-phosphoglycerate dehydrogenase	PHGDH	D-3-phosphoglycerate dehydrogenase;Isoform of O43175, D-3-phosphoglycerate dehydrogenase	non matrisome	non matrisome	88605000	0	34981000	0	53624000	0	0		0	8	2	17	0	1	0	0	28				518	245;332;1459;2521;2957;3936;5986;6135;6951;8140;8393	True;True;True;True;True;True;True;True;True;True;True	259;350;1540;2673;3150;4188;6429;6595;7454;8719;8986	2209;2210;3096;3097;3098;18127;18128;18129;18130;18131;18132;18133;30174;37137;37138;37139;37140;51264;51265;74721;74722;76571;76572;85593;99804;102656;102657;102658	2307;2308;3248;3249;3250;19381;19382;19383;19384;19385;19386;19387;32234;39768;39769;39770;39771;54870;54871;79600;79601;81588;81589;91157;106292;109332;109333;109334	2307;3249;19381;32234;39769;54871;79600;81588;91157;106292;109333
Q8N907	Q8N907	1	1	1	DAN domain family member 5	DAND5	DAN domain family member 5	non matrisome	non matrisome	0	0	0	0	0	0	0		0	0	0	0	1	0	0	0	1				1151	815	TRUE	857	9122	9615	9615
Q9UKG1;C9JAB0	Q9UKG1	3;1	3;1	3;1	DCC-interacting protein 13-alpha	APPL1	DCC-interacting protein 13-alpha	non matrisome	non matrisome	4735300	0	0	0	4735300	0	0		0	0	0	3	1	0	0	1	5				1252	2277;4507;6683	True;True;True	2408;4791;7175	27456;57488;57489;57490;83070	29377;61439;61440;61441;88472	29377;61440;88472
P51397	P51397	1	1	1	Death-associated protein 1	DAP	Death-associated protein 1	non matrisome	non matrisome	4896900	0	0	0	4896900	0	0		0	0	0	1	0	0	0	0	1				899	5946	TRUE	6386	74464	79331	79331
P07585;P07585-2;P07585-3;F8VXZ8;F8VNV6;F8VUF6;F8VWU0;H0YIH3;F8VX58;P07585-4;H0YI87;F8VNW0;F8VU58;F8VSI3;P07585-5	P07585;P07585-2;P07585-3	14;8;7;6;6;6;6;5;5;5;1;1;1;1;1	13;7;6;6;5;6;6;4;5;5;1;1;1;1;1	13;7;6;6;5;6;6;4;5;5;1;1;1;1;1	Decorin	DCN	Decorin;Isoform of P07585, Isoform B of Decorin;Isoform of P07585, Isoform C of Decorin	Core matrisome	Proteoglycans	12564600000	2447500000	2042200000	1582300000	1694000000	2749900000	2048700000		29	56	27	44	51	57	58	49	371				671	1260;1297;1460;2056;3084;4096;5103;5559;6630;7075;8249;8361;8407;8502	True;True;True;False;True;True;True;True;True;True;True;True;True;True	1334;1374;1541;2177;3279;4358;5423;5971;7118;7580;7581;8839;8953;9001;9106	16156;16157;16158;16159;16160;16161;16162;16163;16164;16165;16166;16167;16168;16169;16170;16171;16172;16173;16174;16175;16176;16550;16551;16552;16553;16554;16555;16556;16557;16558;16559;16560;18134;18135;18136;18137;18138;18139;18140;18141;18142;18143;18144;18145;18146;18147;18148;18149;18150;18151;18152;18153;18154;18155;18156;18157;18158;18159;18160;18161;18162;18163;18164;18165;18166;18167;181…	17310;17311;17312;17313;17314;17315;17316;17317;17318;17319;17320;17321;17322;17323;17324;17325;17326;17327;17328;17329;17330;17719;17720;17721;17722;17723;17724;17725;17726;17727;17728;17729;19388;19389;19390;19391;19392;19393;19394;19395;19396;19397;19398;19399;19400;19401;19402;19403;19404;19405;19406;19407;19408;19409;19410;19411;19412;19413;19414;19415;19416;19417;19418;19419;19420;19421;194…	17317;17720;19456;27215;41406;56949;68448;74510;87878;92544;107477;108999;109469;111017	318;319	176;199
O94850	O94850	1	1	1	Dendrin	DDN	Dendrin	non matrisome	non matrisome	900340000	0	0	900340000	0	0	0		0	0	2	0	0	0	0	0	2				558	2942	TRUE	3134	36940;36941	39542;39543	39542
Q9Y3Z3-4;Q9Y3Z3-2;Q9Y3Z3;Q9Y3Z3-3	Q9Y3Z3-4;Q9Y3Z3-2;Q9Y3Z3	3;3;3;1	3;3;3;1	3;3;3;1	Deoxynucleoside triphosphate triphosphohydrolase SAMHD1	SAMHD1	Isoform of Q9Y3Z3, Isoform 4 of Deoxynucleoside triphosphate triphosphohydrolase SAMHD1;Isoform of Q9Y3Z3, Isoform 2 of Deoxynucleoside triphosphate triphosphohydrolase SAMHD1;Deoxynucleoside triphosphate triphosphohydrolase SAMHD1	non matrisome	non matrisome	1239300	0	0	0	0	0	1239300		0	0	0	2	0	0	0	2	4				1271	6767;7812;7989	True;True;True	7261;8377;8561	83613;96006;98044;98045	89042;102289;104432;104433	89042;102289;104433
Q07507	Q07507	7	7	7	Dermatopontin	DPT	Dermatopontin	Core matrisome	ECM Glycoproteins	7954900000	1197900000	1253900000	1102300000	1527400000	1115100000	1758300000		20	26	14	29	33	24	24	30	200				1024	318;2730;2731;5391;6094;8670;8671	True;True;True;True;True;True;True	335;336;2901;2902;5777;5778;6550;9278;9279	2959;2960;2961;2962;2963;2964;2965;2966;2967;2968;2969;2970;2971;2972;2973;2974;2975;2976;2977;2978;2979;2980;2981;2982;2983;2984;2985;2986;2987;2988;2989;2990;32484;32485;32486;32487;32488;32489;32490;32491;32492;32493;32494;32495;32496;32497;32498;32499;32500;32501;32502;32503;32504;32505;32506;32507;32508;32509;32510;32511;32512;32513;32514;32515;32516;32517;32518;32519;32520;32521;32522;32523…	3101;3102;3103;3104;3105;3106;3107;3108;3109;3110;3111;3112;3113;3114;3115;3116;3117;3118;3119;3120;3121;3122;3123;3124;3125;3126;3127;3128;3129;3130;3131;3132;3133;3134;3135;3136;34666;34667;34668;34669;34670;34671;34672;34673;34674;34675;34676;34677;34678;34679;34680;34681;34682;34683;34684;34685;34686;34687;34688;34689;34690;34691;34692;34693;34694;34695;34696;34697;34698;34699;34700;34701;347…	3135;34683;34698;72088;80892;112945;112953	629;630	100;191
P81605;P81605-2	P81605;P81605-2	2;2	2;2	2;2	Dermcidin;Survival-promoting peptide;DCD-1	DCD	Dermcidin;Isoform of P81605, Isoform 2 of Dermcidin	non matrisome	non matrisome	526360000	0	174880000	351480000	0	0	0		1	2	3	1	1	1	1	1	11				992	1197;2112	True;True	1268;2234	15607;15608;15609;15610;15611;15612;15613;15614;15615;25822;25823	16720;16721;16722;16723;16724;16725;16726;16727;16728;27684;27685	16720;27685
P17661	P17661	35	31	31	Desmin	DES	Desmin	non matrisome	non matrisome	5176940000	1008800000	313840000	100090000	2076400000	804170000	873640000		48	28	10	86	39	54	34	55	354				751	156;643;658;1506;1830;2041;2042;2324;2353;2354;2483;3335;3559;3971;4689;4900;5260;5261;5532;5778;6059;6282;6423;6534;6563;7339;7625;7756;7757;7862;7890;7892;8018;8311;8333	True;True;True;True;True;True;True;False;True;True;True;True;True;True;False;True;True;True;True;False;True;True;True;True;True;True;True;True;True;True;False;True;True;True;True	166;679;695;1592;1938;2162;2163;2458;2487;2488;2631;3548;3549;3785;4226;4979;5205;5584;5585;5586;5944;6212;6511;6512;6753;6900;7017;7048;7868;8176;8318;8319;8431;8460;8462;8591;8902;8924	1610;1611;1612;1613;1614;1615;1616;6967;6968;6969;7152;7153;7154;7155;7156;7157;7158;7159;7160;7161;7162;7163;7164;7165;7166;7167;7168;7169;7170;7171;7172;7173;7174;7175;7176;7177;7178;7179;7180;7181;7182;7183;7184;7185;7186;18794;18795;18796;18797;18798;18799;22771;22772;22773;22774;22775;22776;22777;22778;22779;22780;25315;25316;25317;25318;25319;25320;27942;27943;27944;27945;27946;27947;27948;…	1690;1691;1692;1693;1694;1695;1696;7343;7344;7345;7529;7530;7531;7532;7533;7534;7535;7536;7537;7538;7539;7540;7541;7542;7543;7544;7545;7546;7547;7548;7549;7550;7551;7552;7553;7554;7555;7556;7557;7558;7559;7560;7561;7562;7563;7564;7565;7566;7567;20134;20135;20136;20137;20138;20139;24390;24391;24392;24393;24394;24395;24396;24397;24398;24399;27134;27135;27136;27137;27138;27139;29870;29871;29872;2987…	1695;7344;7554;20136;24398;27134;27139;29874;30153;30174;31868;46886;49984;55375;63291;65985;70337;70360;74234;77361;80465;83746;85394;86628;86882;96234;99858;101650;101655;102845;103136;103166;104771;108481;108716	382;383;384	322;346;396
Q08554-2;Q08554	Q08554-2;Q08554	6;6	6;6	6;6	Desmocollin-1	DSC1	Isoform of Q08554, Isoform 1B of Desmocollin-1;Desmocollin-1	non matrisome	non matrisome	108185000	42511000	0	44815000	20859000	0	0		4	2	2	3	0	0	1	2	14				1031	1628;2141;3484;3938;5878;8399	True;True;True;True;True;True	1723;2263;3704;4190;6314;8992	20389;26075;26076;26077;45726;51279;73906;73907;73908;73909;73910;73911;73912;73913;73914;102749;102750;102751	21892;27949;27950;27951;48971;54886;78745;78746;78747;78748;78749;78750;78751;78752;78753;109427;109428;109429	21892;27949;48971;54886;78753;109428
Q02413;Q02413-2	Q02413	8;1	8;1	8;1	Desmoglein-1	DSG1	Desmoglein-1	non matrisome	non matrisome	59357000	0	28088000	0	0	0	31269000		4	5	4	3	1	3	3	6	29				1009	191;491;2106;7531;7959;8039;8815;8872	True;True;True;True;True;True;True;True	203;514;515;2228;8078;8531;8612;9429;9487	1783;5339;5340;5341;5342;5343;25803;25804;92766;97672;97673;97674;97675;97676;97677;97678;97679;97680;97681;97682;97683;97684;97685;97686;97687;98587;108015;108611	1869;5623;5624;5625;5626;5627;27665;27666;98828;104042;104043;104044;104045;104046;104047;104048;104049;104050;104051;104052;104053;104054;104055;104056;104057;104058;104059;104060;105015;114940;115568	1869;5627;27666;98828;104050;105015;114940;115568	607;608	133;221
P15924-2;P15924-3;P15924	P15924-2;P15924-3;P15924	16;16;16	16;16;16	16;16;16	Desmoplakin	DSP	Isoform of P15924, Isoform DPII of Desmoplakin;Isoform of P15924, Isoform DSPIa of Desmoplakin;Desmoplakin	non matrisome	non matrisome	124727000	49475000	14877000	0	22856000	19038000	18481000		8	11	3	13	3	12	7	14	71				746	207;478;1243;2210;2437;3006;3757;4335;4682;5116;6182;6536;7142;8150;8686;8725	True;True;True;True;True;True;True;True;True;True;True;True;True;True;True;True	219;500;1315;2337;2581;3199;3994;4609;4972;5437;6643;7019;7652;8729;9294;9334	1832;1833;1834;5149;15969;15970;15971;26888;26889;26890;26891;26892;26893;26894;26895;26896;26897;26898;26899;26900;29288;29289;29290;29291;37814;37815;37816;37817;49059;49060;49061;49062;49063;49064;49065;55391;55392;55393;59202;64315;64316;64317;77115;77116;77117;77118;77119;81370;81371;81372;81373;81374;81375;81376;81377;81378;81379;81380;81381;81382;88025;88026;88027;99908;99909;106282;106283…	1918;1919;1920;5431;17116;17117;17118;28792;28793;28794;28795;28796;28797;28798;28799;28800;28801;28802;28803;28804;31308;31309;31310;31311;40481;40482;40483;40484;52570;52571;52572;52573;52574;52575;52576;59234;59235;59236;63237;68565;68566;68567;82162;82163;82164;82165;82166;86643;86644;86645;86646;86647;86648;86649;86650;86651;86652;86653;86654;86655;93719;93720;93721;106396;106397;113104;1131…	1918;5431;17117;28801;31310;40484;52574;59235;63237;68567;82166;86645;93720;106397;113104;113641
P60981;P60981-2;F6RFD5	P60981;P60981-2;F6RFD5	8;7;6	8;7;6	8;7;6	Destrin	DSTN	Destrin;Isoform of P60981, Isoform 2 of Destrin;Isoform of P60981, Destrin	non matrisome	non matrisome	1706770000	363110000	236740000	244640000	189710000	237930000	434640000		11	18	10	10	13	14	8	17	101				932	683;797;980;1998;3462;3489;4549;8624	True;True;True;True;True;True;True;True	721;837;1034;2114;3681;3709;3710;4834;9229	7443;7444;7445;7446;7447;7448;7449;7450;7451;7452;7453;7454;7455;8771;8772;8773;8774;8775;8776;8777;8778;8779;8780;8781;8782;8783;8784;8785;8786;8787;8788;8789;8790;8791;8792;8793;8794;8795;8796;8797;8798;8799;8800;11864;11865;11866;11867;11868;11869;11870;11871;11872;24644;24645;24646;45453;45746;45747;45748;45749;45750;45751;45752;45753;45754;45755;45756;45757;45758;45759;45760;45761;45762;4576…	7843;7844;7845;7846;7847;7848;7849;7850;7851;7852;7853;7854;7855;9256;9257;9258;9259;9260;9261;9262;9263;9264;9265;9266;9267;9268;9269;9270;9271;9272;9273;9274;9275;9276;9277;9278;9279;9280;9281;9282;9283;9284;9285;12549;12550;12551;12552;12553;12554;12555;12556;12557;12558;12559;26403;26404;26405;48674;48991;48992;48993;48994;48995;48996;48997;48998;48999;49000;49001;49002;49003;49004;49005;4900…	7854;9282;12553;26403;48674;49011;61768;112356	538	74
Q9Y295	Q9Y295	1	1	1	Developmentally-regulated GTP-binding protein 1	DRG1	Developmentally-regulated GTP-binding protein 1	non matrisome	non matrisome	0	0	0	0	0	0	0		0	1	0	0	0	0	0	0	1				1264	6681	TRUE	7173	83059	88458	88458
D6RGF1;D6RCC2;Q9UBU2	D6RGF1;D6RCC2;Q9UBU2	1;1;1	1;1;1	1;1;1	Dickkopf-related protein 2	DKK2	Isoform of Q9UBU2, Dickkopf-related protein 2;Isoform of Q9UBU2, Dickkopf-related protein 2;Dickkopf-related protein 2	non matrisome	non matrisome	8841900	0	0	0	0	8841900	0		0	0	0	0	0	0	0	0	0				275	7064	TRUE	7569	86828	92467	92467
A0A1C7CYX9;Q16555-2;Q16555;E5RFU4	A0A1C7CYX9;Q16555-2;Q16555	16;16;16;2	13;13;13;2	12;12;12;1	Dihydropyrimidinase-related protein 2	DPYSL2	Isoform of Q16555, Dihydropyrimidinase-related protein 2;Isoform of Q16555, Isoform 2 of Dihydropyrimidinase-related protein 2;Dihydropyrimidinase-related protein 2	non matrisome	non matrisome	592686000	130310000	100260000	0	162530000	61026000	138560000		6	22	1	27	6	7	8	25	102				144	408;1383;1502;3018;3118;3347;3898;4159;4174;5283;5385;5401;5560;6125;7057;7942	True;True;True;True;True;True;True;False;True;False;False;True;True;True;True;True	428;1462;1588;3211;3313;3561;4147;4426;4442;5621;5622;5770;5771;5792;5972;6585;7562;8514	4217;4218;4219;4220;4221;17435;17436;17437;18771;37896;37897;37898;37899;37900;37901;37902;37903;37904;37905;37906;37907;37908;37909;37910;37911;37912;37913;39083;43970;43971;43972;43973;43974;43975;43976;43977;43978;43979;43980;50789;50790;50791;50792;50793;50794;50795;50796;50797;50798;53867;53868;53869;53870;53871;53872;53873;53874;53875;53876;53877;53878;53879;53880;53881;53882;54019;54020;54…	4445;4446;4447;4448;4449;18654;18655;18656;20110;40565;40566;40567;40568;40569;40570;40571;40572;40573;40574;40575;40576;40577;40578;40579;40580;40581;40582;41818;47066;47067;47068;47069;47070;47071;47072;47073;47074;47075;47076;47077;47078;54382;54383;54384;54385;54386;54387;54388;54389;54390;54391;54392;57642;57643;57644;57645;57646;57647;57648;57649;57650;57651;57652;57653;57654;57655;57656;57…	4446;18654;20110;40582;41818;47072;54391;57654;57804;70823;72047;72361;74556;81503;92412;103715	67;68	467;480
Q14195-2;Q14195;H0YBT4;H0YB87;D6RF19;Q14117	Q14195-2;Q14195	26;24;9;1;1;1	26;24;9;1;1;1	22;20;5;1;1;0	Dihydropyrimidinase-related protein 3	DPYSL3	Isoform of Q14195, Isoform LCRMP-4 of Dihydropyrimidinase-related protein 3;Dihydropyrimidinase-related protein 3	non matrisome	non matrisome	1700328000	348250000	198800000	0	587000000	97598000	468680000		13	26	0	74	15	11	10	58	207				1057	46;409;1501;1866;2287;2468;2720;3127;3130;3159;3293;3379;3769;3958;4107;4159;5257;5283;5385;5400;5511;5561;6068;6616;6617;6654	True;True;True;True;True;True;True;True;True;True;True;True;True;True;True;True;True;True;True;True;True;True;True;True;True;True	47;429;1587;1975;2418;2616;2891;3323;3324;3329;3330;3361;3502;3596;4007;4211;4369;4426;5580;5621;5622;5770;5771;5791;5921;5922;5973;6521;7104;7105;7143	409;410;411;412;413;4222;4223;4224;4225;4226;4227;4228;4229;4230;4231;4232;18764;18765;18766;18767;18768;18769;18770;22943;27499;27500;27501;29663;29664;29665;29666;29667;29668;29669;29670;29671;29672;29673;29674;32283;32284;32285;32286;32287;32288;32289;32290;32291;39120;39121;39122;39123;39124;39125;39126;39127;39128;39129;39130;39131;39132;39133;39134;39135;39136;39137;39138;39139;39140;39303;…	419;420;421;422;423;424;4450;4451;4452;4453;4454;4455;4456;4457;4458;4459;4460;20102;20103;20104;20105;20106;20107;20108;20109;24564;29420;29421;29422;31709;31710;31711;31712;31713;31714;31715;31716;31717;31718;31719;31720;34435;34436;34437;34438;34439;34440;34441;34442;34443;41856;41857;41858;41859;41860;41861;41862;41863;41864;41865;41866;41867;41868;41869;41870;41871;41872;41873;41874;41875;41…	423;4459;20107;24564;29422;31716;34435;41866;42049;42495;46278;47443;52771;55204;57068;57654;70322;70823;72047;72355;73890;74570;80589;87776;87779;88236	67;68;642;643;644;645	197;476;489;551;602;612
P11387	P11387	4	4	4	DNA topoisomerase 1	TOP1	DNA topoisomerase 1	non matrisome	non matrisome	13371000	0	0	0	13371000	0	0		0	2	1	2	1	0	0	0	6				707	771;2093;5524;6787	True;True;True;True	810;2215;5936;7282	8435;8436;8437;25654;69509;83775;83776	8889;8890;8891;27505;74118;89237;89238	8890;27505;74118;89238
P11388;P11388-2;P11388-3;P11388-4;J3KTB7;E9PCY5;Q02880-2;Q02880	P11388;P11388-2;P11388-3;P11388-4	7;7;7;7;1;1;1;1	7;7;7;7;1;1;1;1	7;7;7;7;1;1;1;1	DNA topoisomerase 2-alpha	TOP2A	DNA topoisomerase 2-alpha;Isoform of P11388, Isoform 2 of DNA topoisomerase 2-alpha;Isoform of P11388, Isoform 3 of DNA topoisomerase 2-alpha;Isoform of P11388, Isoform 4 of DNA topoisomerase 2-alpha	non matrisome	non matrisome	11222000	0	0	0	11222000	0	0		0	3	0	3	0	0	0	0	6				708	1403;2185;2320;2919;3760;4387;7460	True;True;True;True;True;True;True	1483;2309;2454;3110;3998;4665;7996	17617;26606;27897;36329;49188;56209;91728;91729	18851;28497;29823;38860;52707;60093;97743;97744	18851;28497;29823;38860;52707;60093;97744
A0A0C4DGK8;G3V3C7;G3V5Q1;G3V3M6;P27695;G3V5D9;H7C4A8;G3V5M0;G3V359	A0A0C4DGK8;G3V3C7;G3V5Q1;G3V3M6;P27695;G3V5D9;H7C4A8;G3V5M0;G3V359	2;2;2;2;2;1;1;1;1	2;2;2;2;2;1;1;1;1	2;2;2;2;2;1;1;1;1	DNA-(apurinic or apyrimidinic site) lyase;DNA-(apurinic or apyrimidinic site) lyase, mitochondrial	APEX1	Isoform of P27695, DNA-(apurinic or apyrimidinic site) lyase (Fragment);Isoform of P27695, DNA-(apurinic or apyrimidinic site) lyase (Fragment);Isoform of P27695, DNA-(apurinic or apyrimidinic site) lyase (Fragment);Isoform of P27695, DNA-(apurinic or apyr	non matrisome	non matrisome	16139000	0	0	0	16139000	0	0		0	2	0	4	0	0	0	0	6				101	2733;4840	True;True	2904;5140	32556;32557;61122;61123;61124	34742;34743;34744;65224;65225;65226;65227	34744;65224
P78527;P78527-2	P78527;P78527-2	7;6	7;6	7;6	DNA-dependent protein kinase catalytic subunit	PRKDC	DNA-dependent protein kinase catalytic subunit;Isoform of P78527, Isoform 2 of DNA-dependent protein kinase catalytic subunit	non matrisome	non matrisome	4267100	0	0	0	4267100	0	0		0	2	0	5	0	0	0	0	7				990	567;1448;2667;4683;5158;5271;7701	True;True;True;True;True;True;True	598;1529;2835;4973;5479;5603;8259	6128;6129;17965;31889;59203;64816;66270;94589	6437;6438;19209;34026;63238;69094;70637;100770	6438;19209;34026;63238;69094;70637;100770
P31689-2;P31689	P31689-2;P31689	2;2	2;2	2;2	DnaJ homolog subfamily A member 1	DNAJA1	Isoform of P31689, Isoform 2 of DnaJ homolog subfamily A member 1;DnaJ homolog subfamily A member 1	non matrisome	non matrisome	2849800	0	0	0	2849800	0	0		0	1	0	2	0	0	0	0	3				828	5847;7452	True;True	6282;7986	73492;73493;91658	78301;78302;97672	78302;97672
P25685	P25685	1	1	1	DnaJ homolog subfamily B member 1	DNAJB1	DnaJ homolog subfamily B member 1	non matrisome	non matrisome	5704200	0	0	0	5704200	0	0		0	0	0	2	0	0	0	0	2				794	1725	TRUE	1830	21730;21731	23294;23295	23295
K7EPP7;K7ESP1;K7EIH8;Q99615-2;Q99615	K7EPP7;K7ESP1;K7EIH8;Q99615-2;Q99615	1;1;1;1;1	1;1;1;1;1	1;1;1;1;1	DnaJ homolog subfamily C member 7	DNAJC7	Isoform of Q99615, DnaJ homolog subfamily C member 7;Isoform of Q99615, DnaJ homolog subfamily C member 7 (Fragment);Isoform of Q99615, DnaJ homolog subfamily C member 7 (Fragment);Isoform of Q99615, Isoform 2 of DnaJ homolog subfamily C member 7;DnaJ homo	non matrisome	non matrisome	2816100	0	0	0	2816100	0	0		0	1	0	1	0	0	0	0	2				470	819	TRUE	861	9161;9162	9654;9655	9654
O75937	O75937	1	1	1	DnaJ homolog subfamily C member 8	DNAJC8	DnaJ homolog subfamily C member 8	non matrisome	non matrisome	0	0	0	0	0	0	0		0	1	0	0	0	0	0	0	1				555	1933	TRUE	2043	23616	25284	25284
A0A0C4DGS1;P39656-3;P39656;U3KQ84;P39656-2	A0A0C4DGS1;P39656-3;P39656;U3KQ84;P39656-2	3;3;3;2;2	3;3;3;2;2	3;3;3;2;2	Dolichyl-diphosphooligosaccharide--protein glycosyltransferase 48 kDa subunit	DDOST	Isoform of P39656, Dolichyl-diphosphooligosaccharide--protein glycosyltransferase 48 kDa subunit;Isoform of P39656, Isoform 3 of Dolichyl-diphosphooligosaccharide--protein glycosyltransferase 48 kDa subunit;Dolichyl-diphosphooligosaccharide--protein glycos	non matrisome	non matrisome	15658000	0	0	0	15658000	0	0		0	1	0	4	0	0	0	0	5				103	5694;7210;7521	True;True;True	6122;7730;8065	71741;89159;89160;92692;92693	76438;94960;94961;98753;98754	76438;94961;98753
P04843;F8WF32;B7Z4L4	P04843;F8WF32;B7Z4L4	6;3;3	6;3;3	6;3;3	Dolichyl-diphosphooligosaccharide--protein glycosyltransferase subunit 1	RPN1	Dolichyl-diphosphooligosaccharide--protein glycosyltransferase subunit 1;Isoform of P04843, Dolichyl-diphosphooligosaccharide--protein glycosyltransferase subunit 1;Isoform of P04843, Dolichyl-diphosphooligosaccharide--protein glycosyltransferase subunit 1	non matrisome	non matrisome	30401000	0	12457000	0	17944000	0	0		1	4	0	8	0	0	0	0	13				638	520;755;2551;3860;6575;8394	True;True;True;True;True;True	545;794;2703;4107;7061;8987	5598;5599;5600;5601;5602;8334;8335;30559;30560;50469;81763;81764;102659	5895;5896;5897;5898;5899;8787;8788;32636;32637;54049;87047;87048;109335	5899;8787;32636;54049;87048;109335
Q5JYR4;Q5JYR7;P04844-2;P04844;F2Z3K5	Q5JYR4;Q5JYR7;P04844-2;P04844;F2Z3K5	2;2;2;2;1	2;2;2;2;1	2;2;2;2;1	Dolichyl-diphosphooligosaccharide--protein glycosyltransferase subunit 2	RPN2	Isoform of P04844, Dolichyl-diphosphooligosaccharide--protein glycosyltransferase subunit 2 (Fragment);Isoform of P04844, Dolichyl-diphosphooligosaccharide--protein glycosyltransferase subunit 2 (Fragment);Isoform of P04844, Isoform 2 of Dolichyl-diphospho	non matrisome	non matrisome	4393500	0	0	0	4393500	0	0		0	0	0	2	0	0	0	0	2				639	6876;8720	True;True	7376;9329	84841;106725	90380;113583	90380;113583
F5H895;A0A0B4J239;F5GXX5;P61803	F5H895;A0A0B4J239;F5GXX5;P61803	2;2;2;2	2;2;2;2	2;2;2;2	Dolichyl-diphosphooligosaccharide--protein glycosyltransferase subunit DAD1	DAD1	Isoform of P61803, Dolichyl-diphosphooligosaccharide--protein glycosyltransferase subunit DAD1;Isoform of P61803, Dolichyl-diphosphooligosaccharide--protein glycosyltransferase subunit DAD1;Isoform of P61803, Dolichyl-diphosphooligosaccharide--protein glyc	non matrisome	non matrisome	21573000	0	21573000	0	0	0	0		1	5	0	2	4	3	1	0	16				91	2481;6641	True;True	2629;7130	29792;29793;29794;29795;29796;29797;29798;29799;29800;29801;82732;82733;82734;82735;82736;82737;82738	31847;31848;31849;31850;31851;31852;31853;31854;31855;31856;88124;88125;88126;88127;88128;88129;88130	31848;88129
P46977-2;P46977	P46977-2;P46977	1;1	1;1	1;1	Dolichyl-diphosphooligosaccharide--protein glycosyltransferase subunit STT3A	STT3A	Isoform of P46977, Isoform 2 of Dolichyl-diphosphooligosaccharide--protein glycosyltransferase subunit STT3A;Dolichyl-diphosphooligosaccharide--protein glycosyltransferase subunit STT3A	non matrisome	non matrisome	0	0	0	0	0	0	0		0	1	0	0	1	0	0	0	2				876	1165	TRUE	1236	15364;15365	16464;16465	16464
A0A087X1A5;Q5JW30;O95793-2;O95793-3;O95793;Q5JW28;G5EA18;E5RJN7;E7EVI1;A0A0A0MTC4;A0A0A0MTD1;F8VPI7;E7EPX0;A0A0A0MTC6;E7EVJ4;E9PH62;A0A0A0MTC5;Q9NUL3-4;Q9NUL3-6;Q9NUL3-8;Q9NUL3-3;Q9NUL3-7;Q9NUL3-2;Q9NUL3	A0A087X1A5;Q5JW30;O95793-2;O95793-3;O95793;Q5JW28;G5EA18;E5RJN7;E7EVI1;A0A0A0MTC4;A0A0A0MTD1;F8VPI7;E7EPX0;A0A0A0MTC6;E7EVJ4;E9PH62;A0A0A0MTC5;Q9NUL3-4;Q9NUL3-6;Q9NUL3-8;Q9NUL3-3;Q9NUL3-7;Q9NUL3-2;Q9NUL3	2;2;2;2;2;1;1;1;1;1;1;1;1;1;1;1;1;1;1;1;1;1;1;1	2;2;2;2;2;1;1;1;1;1;1;1;1;1;1;1;1;1;1;1;1;1;1;1	2;2;2;2;2;1;1;1;1;1;1;1;1;1;1;1;1;1;1;1;1;1;1;1	Double-stranded RNA-binding protein Staufen homolog 1;Double-stranded RNA-binding protein Staufen homolog 2	STAU1;STAU2	Isoform of O95793, Double-stranded RNA-binding protein Staufen homolog 1;Isoform of O95793, Double-stranded RNA-binding protein Staufen homolog 1;Isoform of O95793, Isoform Short of Double-stranded RNA-binding protein Staufen homolog 1;Isoform of O95793, I	non matrisome	non matrisome	2067600	0	0	0	2067600	0	0		0	0	0	2	0	0	0	0	2				52	4328;5415	True;True	4602;5813	55353;68172	59196;72675	59196;72675
H0YCK3;P55265-5;P55265-3;P55265-2;P55265;P55265-4	H0YCK3;P55265-5;P55265-3;P55265-2;P55265;P55265-4	3;3;3;3;3;3	3;3;3;3;3;3	3;3;3;3;3;3	Double-stranded RNA-specific adenosine deaminase	ADAR	Isoform of P55265, Double-stranded RNA-specific adenosine deaminase (Fragment);Isoform of P55265, Isoform 5 of Double-stranded RNA-specific adenosine deaminase;Isoform of P55265, Isoform 3 of Double-stranded RNA-specific adenosine deaminase;Isoform of P552	non matrisome	non matrisome	65528000	0	65528000	0	0	0	0		0	3	0	0	0	0	0	1	4				407	1391;2867;7175	True;True;True	1470;3053;7687	17488;35442;35443;35444;88503	18708;37891;37892;37893;94257	18708;37891;94257
D6R9W4;D6R9Q9;Q16643;Q16643-2;Q16643-3	D6R9W4;D6R9Q9;Q16643;Q16643-2;Q16643-3	1;1;1;1;1	1;1;1;1;1	1;1;1;1;1	Drebrin	DBN1	Isoform of Q16643, Drebrin (Fragment);Isoform of Q16643, Drebrin;Drebrin;Isoform of Q16643, Isoform 2 of Drebrin;Isoform of Q16643, Isoform 3 of Drebrin	non matrisome	non matrisome	4818300	0	0	0	4818300	0	0		0	0	0	1	0	0	0	0	1				270	6750	TRUE	7244	83532	88960	88960
Q9UJU6;Q9UJU6-2;Q9UJU6-3;F8WBG8;Q9UJU6-6;B4DDD6;F8WC20;F8WBB2;F8WFE1;H0Y5J4;F2Z2V3;F8WB73;F8WCK3;F2Z3E3;Q9UJU6-5;Q9UJU6-4	Q9UJU6;Q9UJU6-2;Q9UJU6-3;F8WBG8;Q9UJU6-6;B4DDD6	6;6;6;5;5;4;2;2;2;2;1;1;1;1;1;1	6;6;6;5;5;4;2;2;2;2;1;1;1;1;1;1	6;6;6;5;5;4;2;2;2;2;1;1;1;1;1;1	Drebrin-like protein	DBNL	Drebrin-like protein;Isoform of Q9UJU6, Isoform 2 of Drebrin-like protein;Isoform of Q9UJU6, Isoform 3 of Drebrin-like protein;Isoform of Q9UJU6, Drebrin-like protein;Isoform of Q9UJU6, Isoform 6 of Drebrin-like protein;Isoform of Q9UJU6, Drebrin-like prot	non matrisome	non matrisome	122429000	0	35691000	0	32362000	0	54376000		0	2	0	6	5	1	1	5	20				1250	182;2662;2694;5501;7009;7766	True;True;True;True;True;True	194;2827;2865;5911;7513;8328;8329	1738;1739;1740;1741;1742;31804;31805;31806;31807;31808;32081;32082;32083;32084;69125;69126;69127;86085;95462;95463;95464;95465	1824;1825;1826;1827;1828;33936;33937;33938;33939;33940;34232;34233;34234;34235;73706;73707;73708;91664;101690;101691;101692;101693	1828;33940;34234;73707;91664;101693	731	53
G8JLD5;O00429-7;O00429-4;O00429-5;O00429-3;O00429-2;O00429;O00429-8;O00429-6	G8JLD5;O00429-7;O00429-4;O00429-5;O00429-3;O00429-2;O00429;O00429-8;O00429-6	2;2;2;2;2;2;2;2;2	2;2;2;2;2;2;2;2;2	2;2;2;2;2;2;2;2;2	Dynamin-1-like protein	DNM1L	Isoform of O00429, Dynamin-1-like protein;Isoform of O00429, Isoform 7 of Dynamin-1-like protein;Isoform of O00429, Isoform 3 of Dynamin-1-like protein;Isoform of O00429, Isoform 5 of Dynamin-1-like protein;Isoform of O00429, Isoform 2 of Dynamin-1-like pr	non matrisome	non matrisome	6831100	0	0	0	6831100	0	0		1	0	0	2	0	0	0	0	3				396	1637;6642	True;True	1732;7131	20582;82739;82740;82741	22086;88131;88132;88133	22086;88133
P50570-2;P50570-5;P50570;P50570-3;P50570-4;K7EMQ3;A0A1B0GUX5;A0A1B0GU67;E5RIK2;E5RHK8;A0A0D9SFB1;A0A0U1RQP1;A0A0D9SFE4;Q9UQ16-5;Q05193-5;Q05193-3;Q9UQ16-2;Q9UQ16-3;Q05193-2;Q05193;Q9UQ16;Q9UQ16-4	P50570-2;P50570-5;P50570;P50570-3;P50570-4;K7EMQ3	4;4;4;3;3;2;1;1;1;1;1;1;1;1;1;1;1;1;1;1;1;1	4;4;4;3;3;2;1;1;1;1;1;1;1;1;1;1;1;1;1;1;1;1	4;4;4;3;3;2;1;1;1;1;1;1;1;1;1;1;1;1;1;1;1;1	Dynamin-2	DNM2	Isoform of P50570, Isoform 2 of Dynamin-2;Isoform of P50570, Isoform 5 of Dynamin-2;Dynamin-2;Isoform of P50570, Isoform 3 of Dynamin-2;Isoform of P50570, Isoform 4 of Dynamin-2;Isoform of P50570, Dynamin-2 (Fragment)	non matrisome	non matrisome	6713600	0	0	0	6713600	0	0		1	1	0	4	0	0	0	2	8				895	2420;3025;4188;7392	True;True;True;True	2562;3219;4457;7924	29207;37952;37953;54157;54158;54159;54160;90964	31218;40625;40626;57947;57948;57949;57950;96885	31218;40625;57950;96885
Q8TD57-3;Q8TD57	Q8TD57-3;Q8TD57	1;1	1;1	1;1	Dynein heavy chain 3, axonemal	DNAH3	Isoform of Q8TD57, Isoform 3 of Dynein heavy chain 3, axonemal;Dynein heavy chain 3, axonemal	non matrisome	non matrisome	0	0	0	0	0	0	0		0	0	0	0	1	0	0	0	1	+			1158	4358	TRUE	4633	55682	59531	59531	695	1824
P63167;Q96FJ2;F8VXI7;F8VXL2;F8VRV5	P63167;Q96FJ2	3;2;1;1;1	3;2;1;1;1	3;2;1;1;1	Dynein light chain 1, cytoplasmic;Dynein light chain 2, cytoplasmic	DYNLL1;DYNLL2	Dynein light chain 1, cytoplasmic;Dynein light chain 2, cytoplasmic	non matrisome	non matrisome	246797000	36339000	60563000	0	59464000	43545000	46886000		2	6	1	8	8	9	2	4	40				974	5417;5478;8791	True;True;True	5815;5888;9404	68174;68787;68788;68789;68790;68791;68792;68793;68794;68795;68796;68797;68798;68799;68800;68801;68802;68803;68804;68805;68806;68807;68808;107656;107657;107658;107659;107660;107661;107662;107663;107664;107665;107666;107667;107668;107669;107670;107671;107672	72677;73344;73345;73346;73347;73348;73349;73350;73351;73352;73353;73354;73355;73356;73357;73358;73359;73360;73361;73362;73363;73364;73365;114544;114545;114546;114547;114548;114549;114550;114551;114552;114553;114554;114555;114556;114557;114558;114559;114560;114561;114562;114563	72677;73350;114553
Q14174;Q4G0X0;A0A087WV90;E9PDN5;A0A087WTU7;A0A075B6G3;P11532-4;P11532	Q14174;Q4G0X0;A0A087WV90;E9PDN5;A0A087WTU7;A0A075B6G3;P11532-4;P11532	1;1;1;1;1;1;1;1	1;1;1;1;1;1;1;1	1;1;1;1;1;1;1;1	Dystrophin	DMD	Isoform of P11532, Duchenne muscular dystrophy protein (Fragment);Isoform of P11532, DMD protein;Isoform of P11532, Dystrophin;Isoform of P11532, Dystrophin;Isoform of P11532, Dystrophin;Isoform of P11532, Dystrophin;Isoform of P11532, Isoform 3 of Dystrop	non matrisome	non matrisome	9395100	0	0	0	9395100	0	0		0	0	0	1	0	0	0	0	1				3	8170	TRUE	8750	99972	106460	106460
P49792;F8VYC4;J3KNE0;P0DJD0;P0DJD1;Q7Z3J3;A6NKT7	P49792;F8VYC4;J3KNE0;P0DJD0;P0DJD1;Q7Z3J3;A6NKT7	2;1;1;1;1;1;1	2;1;1;1;1;1;1	2;1;1;1;1;1;1	E3 SUMO-protein ligase RanBP2;RANBP2-like and GRIP domain-containing protein 1;RANBP2-like and GRIP domain-containing protein 2;RanBP2-like and GRIP domain-containing protein 4;RanBP2-like and GRIP domain-containing protein 3	RANBP2;RGPD1;RGPD3;RGPD2;RGPD4	E3 SUMO-protein ligase RanBP2;Isoform of P0DJD0, RANBP2-like and GRIP domain-containing protein 1;Isoform of A6NKT7, RanBP2-like and GRIP domain-containing protein 3;RANBP2-like and GRIP domain-containing protein 1;RANBP2-like and GRIP domain-containing pr	non matrisome	non matrisome	0	0	0	0	0	0	0		0	0	0	1	0	0	1	0	2				888	2814;7562	True;True	2993;8112	33917;33918;93040	36180;36181;99122	36181;99122
Q14258	Q14258	1	1	1	E3 ubiquitin/ISG15 ligase TRIM25	TRIM25	E3 ubiquitin/ISG15 ligase TRIM25	non matrisome	non matrisome	1898600	0	0	0	1898600	0	0		0	0	0	1	0	0	0	0	1				1059	8059	TRUE	8634	98843	105282	105282
O75592-2;O75592	O75592-2;O75592	1;1	1;1	1;1	E3 ubiquitin-protein ligase MYCBP2	MYCBP2	Isoform of O75592, Isoform 2 of E3 ubiquitin-protein ligase MYCBP2;E3 ubiquitin-protein ligase MYCBP2	non matrisome	non matrisome	0	0	0	0	0	0	0		0	1	0	0	0	0	1	0	2				549	5379	TRUE	5762	67555;67556	72008;72009	72009	218	2280
P36406-3;P36406-2;P36406	P36406-3;P36406-2;P36406	1;1;1	1;1;1	1;1;1	E3 ubiquitin-protein ligase TRIM23	TRIM23	Isoform of P36406, Isoform Gamma of E3 ubiquitin-protein ligase TRIM23;Isoform of P36406, Isoform Beta of E3 ubiquitin-protein ligase TRIM23;E3 ubiquitin-protein ligase TRIM23	non matrisome	non matrisome	12536000	0	0	0	0	0	12536000		1	0	0	2	0	0	0	2	5				847	1180	TRUE	1251	15512;15513;15514;15515;15516	16618;16619;16620;16621;16622	16619
Q96C19;A0A087X1Z2;H0Y4Y4;Q9BUP0-2;C9JTV4;Q8WYH2	Q96C19;A0A087X1Z2;H0Y4Y4;Q9BUP0-2	3;2;2;2;1;1	3;2;2;2;1;1	1;0;0;0;0;0	EF-hand domain-containing protein D2;EF-hand domain-containing protein D1	EFHD2;EFHD1	EF-hand domain-containing protein D2;Isoform of Q9BUP0, EF-hand domain-containing protein D1;Isoform of Q96C19, EF-hand domain-containing protein D2 (Fragment);Isoform of Q9BUP0, Isoform 2 of EF-hand domain-containing protein D1	non matrisome	non matrisome	25769500	0	5790300	0	7498200	0	12481000		1	2	0	4	1	0	0	5	13				1178	1309;4529;7943	True;True;True	1387;4814;8515	16716;16717;16718;57610;57611;57612;57613;57614;97374;97375;97376;97377;97378;97379	17889;17890;17891;61564;61565;61566;61567;61568;103720;103721;103722;103723;103724;103725	17891;61567;103723
Q12805-2;Q12805-4;Q12805-3;Q12805;Q580Q6;C9JQX7;C9J4J8;C9JPZ9;C9JUM4	Q12805-2;Q12805-4;Q12805-3;Q12805	20;20;20;20;3;2;2;2;1	20;20;20;20;3;2;2;2;1	3;3;3;3;1;1;1;1;1	EGF-containing fibulin-like extracellular matrix protein 1	EFEMP1	Isoform of Q12805, Isoform 2 of EGF-containing fibulin-like extracellular matrix protein 1;Isoform of Q12805, Isoform 4 of EGF-containing fibulin-like extracellular matrix protein 1;Isoform of Q12805, Isoform 3 of EGF-containing fibulin-like extracellular	Core matrisome	ECM Glycoproteins	20363600000	3137500000	3430600000	4698900000	1521500000	2516300000	5058800000		51	78	64	53	81	58	81	99	565				1035	147;1123;1131;1372;1800;1965;2082;2577;3270;4007;4811;5081;5623;6269;6394;6495;6808;7049;7165;7254	True;True;True;True;True;True;True;True;True;True;True;True;True;True;True;True;True;True;True;True	157;1192;1200;1451;1907;1908;2077;2078;2204;2731;2732;3477;4265;5111;5401;6046;6738;6739;6870;6977;7303;7554;7677;7776	1510;1511;1512;1513;1514;1515;1516;1517;1518;1519;1520;1521;1522;1523;1524;1525;1526;1527;1528;1529;1530;1531;1532;1533;1534;1535;1536;1537;1538;1539;1540;1541;1542;1543;1544;1545;1546;14679;14680;14681;14682;14683;14684;14685;14686;14687;14688;14689;14690;14691;14692;14693;14694;14695;14696;14697;14698;14699;14700;14701;14702;14703;14704;14705;14706;14707;14708;14709;14791;14792;14793;14794;1479…	1585;1586;1587;1588;1589;1590;1591;1592;1593;1594;1595;1596;1597;1598;1599;1600;1601;1602;1603;1604;1605;1606;1607;1608;1609;1610;1611;1612;1613;1614;1615;1616;1617;1618;1619;1620;1621;1622;15716;15717;15718;15719;15720;15721;15722;15723;15724;15725;15726;15727;15728;15729;15730;15731;15732;15733;15734;15735;15736;15737;15738;15739;15740;15741;15742;15743;15744;15745;15746;15747;15748;15837;15838…	1619;15734;15850;18564;24142;26014;27390;32980;45915;55845;64935;68210;75645;83581;85105;86113;89522;92314;94115;95368	634;635;636;637	311;341;440;459
Q12805-5;A0A0U1RQV3	Q12805-5;A0A0U1RQV3	19;18	2;2	2;2	EGF-containing fibulin-like extracellular matrix protein 1	EFEMP1	Isoform of Q12805, Isoform 5 of EGF-containing fibulin-like extracellular matrix protein 1;Isoform of Q12805, EGF-containing fibulin-like extracellular matrix protein 1 (Fragment)	Core matrisome	ECM Glycoproteins	37536000	0	0	0	14454000	0	23082000		1	3	3	2	1	2	1	2	15				1036	147;1123;1131;1800;1965;2082;2577;2849;3270;4007;5081;5623;6269;6393;6495;6808;7049;7165;7254	False;False;False;False;False;False;False;True;False;False;False;False;False;True;False;False;False;False;False	157;1192;1200;1907;1908;2077;2078;2204;2731;2732;3030;3477;4265;5401;6046;6738;6739;6869;6977;7303;7554;7677;7776	1510;1511;1512;1513;1514;1515;1516;1517;1518;1519;1520;1521;1522;1523;1524;1525;1526;1527;1528;1529;1530;1531;1532;1533;1534;1535;1536;1537;1538;1539;1540;1541;1542;1543;1544;1545;1546;14679;14680;14681;14682;14683;14684;14685;14686;14687;14688;14689;14690;14691;14692;14693;14694;14695;14696;14697;14698;14699;14700;14701;14702;14703;14704;14705;14706;14707;14708;14709;14791;14792;14793;14794;1479…	1585;1586;1587;1588;1589;1590;1591;1592;1593;1594;1595;1596;1597;1598;1599;1600;1601;1602;1603;1604;1605;1606;1607;1608;1609;1610;1611;1612;1613;1614;1615;1616;1617;1618;1619;1620;1621;1622;15716;15717;15718;15719;15720;15721;15722;15723;15724;15725;15726;15727;15728;15729;15730;15731;15732;15733;15734;15735;15736;15737;15738;15739;15740;15741;15742;15743;15744;15745;15746;15747;15748;15837;15838…	1619;15734;15850;24142;26014;27390;32980;36656;45915;55845;68210;75645;83581;85102;86113;89522;92314;94115;95368	634;635;636;637	181;211;310;329
O95967;E9PRU1;H0YEU0;H0YET5;H0YCR9;E9PI47;E9PRQ8;E9PKA3	O95967;E9PRU1	7;6;3;3;2;2;1;1	7;6;3;3;2;2;1;1	7;6;3;3;2;2;1;1	EGF-containing fibulin-like extracellular matrix protein 2	EFEMP2	EGF-containing fibulin-like extracellular matrix protein 2;Isoform of O95967, EGF-containing fibulin-like extracellular matrix protein 2	Core matrisome	ECM Glycoproteins	141904000	0	42483000	0	0	39109000	60312000		0	7	7	2	9	6	6	10	47				566	321;2179;2576;3813;6132;6673;8782	True;True;True;True;True;True;True	339;2303;2730;4055;6592;7165;9394;9395	3036;3037;26580;26581;26582;26583;26584;26585;26586;26587;26588;30888;30889;30890;30891;30892;30893;30894;30895;49747;49748;49749;49750;49751;49752;49753;76515;76516;76517;76518;76519;82994;82995;107538;107539;107540;107541;107542;107543;107544;107545;107546;107547;107548;107549;107550;107551	3184;3185;28471;28472;28473;28474;28475;28476;28477;28478;28479;32972;32973;32974;32975;32976;32977;32978;32979;53289;53290;53291;53292;53293;53294;53295;81531;81532;81533;81534;81535;81536;88390;88391;114419;114420;114421;114422;114423;114424;114425;114426;114427;114428;114429;114430;114431;114432	3184;28473;32973;53295;81531;88391;114428	220;221	209;348
O43854-2;O43854	O43854-2;O43854	2;2	2;2	2;2	EGF-like repeat and discoidin I-like domain-containing protein 3	EDIL3	Isoform of O43854, Isoform 2 of EGF-like repeat and discoidin I-like domain-containing protein 3;EGF-like repeat and discoidin I-like domain-containing protein 3	Core matrisome	ECM Glycoproteins	0	0	0	0	0	0	0		0	2	0	1	4	2	0	0	9				527	8411;8414	True;True	9005;9008	102832;102833;102834;102835;102863;102864;102865;102866;102867;102868;102869;102870	109511;109512;109513;109514;109543;109544;109545;109546;109547;109548;109549;109550	109514;109549
Q9NZN4;Q9NZN4-2	Q9NZN4;Q9NZN4-2	16;12	16;12	14;11	EH domain-containing protein 2	EHD2	EH domain-containing protein 2;Isoform of Q9NZN4, Isoform 2 of EH domain-containing protein 2	non matrisome	non matrisome	341485000	74545000	40926000	0	109960000	20648000	95406000		7	8	1	20	6	3	1	16	62				1238	143;2432;3416;4447;4455;4504;4680;4745;4830;4861;4998;5363;5900;8017;8477;8541	True;True;True;True;True;True;True;True;True;True;True;True;True;True;True;True	153;2575;3635;4727;4735;4788;4970;5035;5130;5164;5312;5739;5740;6337;8590;9078;9146	1504;1505;29273;44782;44783;56736;56737;56804;57462;57463;57464;57465;57466;57467;57468;59198;59199;59200;59830;59831;59832;59833;59834;59835;59836;59837;59838;59839;59840;59841;59842;59843;61035;61036;61037;61038;61039;61040;61041;61042;61043;61044;61045;61046;61047;61048;61049;61385;63150;67426;67427;67428;74089;98358;98359;103905;103906;103907;103908;103909;103910;103911;103912;104684	1579;1580;31292;31293;47963;47964;60634;60635;60636;60703;61413;61414;61415;61416;61417;61418;61419;63233;63234;63235;63893;63894;63895;63896;63897;63898;63899;63900;63901;63902;63903;63904;63905;63906;65135;65136;65137;65138;65139;65140;65141;65142;65143;65144;65145;65146;65147;65148;65149;65150;65151;65501;67377;71867;71868;71869;78934;104769;104770;110630;110631;110632;110633;110634;110635;110…	1579;31293;47963;60636;60703;61417;63234;63900;65151;65501;67377;71868;78934;104770;110637;111436	727;728;729	359;385;500
Q9NZN3;C9JC03;A0A024R571;Q9H4M9;C9JIJ3;C9IZH1;Q9NZN3-2;C9JDQ8;C9J2Z4	Q9NZN3;C9JC03;A0A024R571;Q9H4M9;C9JIJ3;C9IZH1;Q9NZN3-2	4;3;3;3;2;2;2;1;1	3;2;2;2;1;1;1;1;1	2;1;1;1;1;1;1;0;0	EH domain-containing protein 3;EH domain-containing protein 1	EHD3;EHD1	EH domain-containing protein 3;Isoform of Q9H4M9, EH domain-containing protein 1 (Fragment);Isoform of Q9H4M9, EH domain-containing protein 1;EH domain-containing protein 1;Isoform of Q9H4M9, EH domain-containing protein 1 (Fragment);Isoform of Q9H4M9, EH	non matrisome	non matrisome	19074400	0	0	0	8820400	0	10254000		1	1	0	4	0	0	0	2	8				1237	4500;4745;4808;8542	True;False;True;True	4784;5035;5108;9147	57443;57444;59830;59831;59832;59833;59834;59835;59836;59837;59838;59839;59840;59841;59842;59843;60777;60778;60779;60780;60781;104685;104686	61394;61395;63893;63894;63895;63896;63897;63898;63899;63900;63901;63902;63903;63904;63905;63906;64868;64869;64870;64871;64872;111437;111438	61395;63900;64872;111437
P15502-4;E7EN65;F8WAH6;P15502-2;P15502-1;P15502;P15502-9;P15502-13;P15502-10	P15502-4;E7EN65;F8WAH6;P15502-2;P15502-1;P15502;P15502-9;P15502-13;P15502-10	16;15;15;15;15;15;15;14;14	16;15;15;15;15;15;15;14;14	1;0;1;0;0;1;1;0;0	Elastin	ELN	Isoform of P15502, Isoform 4 of Elastin;Isoform of P15502, Elastin;Isoform of P15502, Elastin;Isoform of P15502, Isoform 2 of Elastin;Isoform of P15502, Isoform 1 of Elastin;Elastin;Isoform of P15502, Isoform 9 of Elastin;Isoform of P15502, Isoform 13 of E	Core matrisome	ECM Glycoproteins	106932100000	7039100000	34061000000	17229000000	10040000000	16201000000	22362000000		45	125	62	66	79	69	60	90	596				742	282;283;345;569;2433;2547;2548;4851;4876;5800;5959;6949;8255;8681;8682;8705	True;True;True;True;True;True;True;True;True;True;True;True;True;True;True;True	298;299;363;600;2576;2699;2700;5152;5180;6234;6399;7452;8845;9289;9290;9314	2462;2463;2464;2465;2466;2467;2468;2469;2470;2471;2472;2473;2474;2475;2476;2477;2478;2479;2480;2481;2482;2483;2484;2485;2486;2487;2488;2489;2490;2491;2492;2493;2494;2495;2496;2497;2498;2499;2500;2501;2502;2503;2504;2505;2506;2507;2508;2509;2510;2511;2512;2513;2514;2515;2516;2517;2518;2519;2520;2521;2522;2523;2524;2525;2526;2527;2528;2529;2530;2531;2532;2533;2534;2535;2536;2537;2538;2539;2540;2541…	2573;2574;2575;2576;2577;2578;2579;2580;2581;2582;2583;2584;2585;2586;2587;2588;2589;2590;2591;2592;2593;2594;2595;2596;2597;2598;2599;2600;2601;2602;2603;2604;2605;2606;2607;2608;2609;2610;2611;2612;2613;2614;2615;2616;2617;2618;2619;2620;2621;2622;2623;2624;2625;2626;2627;2628;2629;2630;2631;2632;2633;2634;2635;2636;2637;2638;2639;2640;2641;2642;2643;2644;2645;2646;2647;2648;2649;2650;2651;2652…	2573;2653;3368;6446;31294;32551;32619;65334;65801;77640;79392;91132;107564;113050;113096;113399
E7ENM0;P15502-7;P15502-6;B3KRT8;E7ENW7;E7EWS8;E7EN51	E7ENM0;P15502-7;P15502-6;B3KRT8	15;14;14;10;5;3;3	1;1;1;1;0;0;0	0;0;0;0;0;0;0	Elastin	ELN	Isoform of P15502, Elastin;Isoform of P15502, Isoform 7 of Elastin;Isoform of P15502, Isoform 6 of Elastin;Isoform of P15502, Elastin	Core matrisome	ECM Glycoproteins	596090000	0	359530000	0	0	0	236560000		1	3	1	2	3	2	3	2	17				291	282;283;345;569;2433;2547;2548;4851;4876;5800;5959;8255;8682;8704;8705	False;False;False;False;False;False;False;False;False;False;False;False;False;True;False	298;299;363;600;2576;2699;2700;5152;5180;6234;6399;8845;9290;9313;9314	2462;2463;2464;2465;2466;2467;2468;2469;2470;2471;2472;2473;2474;2475;2476;2477;2478;2479;2480;2481;2482;2483;2484;2485;2486;2487;2488;2489;2490;2491;2492;2493;2494;2495;2496;2497;2498;2499;2500;2501;2502;2503;2504;2505;2506;2507;2508;2509;2510;2511;2512;2513;2514;2515;2516;2517;2518;2519;2520;2521;2522;2523;2524;2525;2526;2527;2528;2529;2530;2531;2532;2533;2534;2535;2536;2537;2538;2539;2540;2541…	2573;2574;2575;2576;2577;2578;2579;2580;2581;2582;2583;2584;2585;2586;2587;2588;2589;2590;2591;2592;2593;2594;2595;2596;2597;2598;2599;2600;2601;2602;2603;2604;2605;2606;2607;2608;2609;2610;2611;2612;2613;2614;2615;2616;2617;2618;2619;2620;2621;2622;2623;2624;2625;2626;2627;2628;2629;2630;2631;2632;2633;2634;2635;2636;2637;2638;2639;2640;2641;2642;2643;2644;2645;2646;2647;2648;2649;2650;2651;2652…	2573;2653;3368;6446;31294;32551;32619;65334;65801;77640;79392;107564;113096;113390;113399
P15502-8;P15502-11	P15502-8	13;6	1;1	0;0	Elastin	ELN	Isoform of P15502, Isoform 8 of Elastin	Core matrisome	ECM Glycoproteins	209150000	0	0	0	0	0	209150000		3	6	6	4	3	3	5	5	35				744	282;283;345;569;2433;2547;2548;4855;5800;5959;8255;8682;8704	False;False;False;False;False;False;False;True;False;False;False;False;False	298;299;363;600;2576;2699;2700;5157;6234;6399;8845;9290;9313	2462;2463;2464;2465;2466;2467;2468;2469;2470;2471;2472;2473;2474;2475;2476;2477;2478;2479;2480;2481;2482;2483;2484;2485;2486;2487;2488;2489;2490;2491;2492;2493;2494;2495;2496;2497;2498;2499;2500;2501;2502;2503;2504;2505;2506;2507;2508;2509;2510;2511;2512;2513;2514;2515;2516;2517;2518;2519;2520;2521;2522;2523;2524;2525;2526;2527;2528;2529;2530;2531;2532;2533;2534;2535;2536;2537;2538;2539;2540;2541…	2573;2574;2575;2576;2577;2578;2579;2580;2581;2582;2583;2584;2585;2586;2587;2588;2589;2590;2591;2592;2593;2594;2595;2596;2597;2598;2599;2600;2601;2602;2603;2604;2605;2606;2607;2608;2609;2610;2611;2612;2613;2614;2615;2616;2617;2618;2619;2620;2621;2622;2623;2624;2625;2626;2627;2628;2629;2630;2631;2632;2633;2634;2635;2636;2637;2638;2639;2640;2641;2642;2643;2644;2645;2646;2647;2648;2649;2650;2651;2652…	2573;2653;3368;6446;31294;32551;32619;65458;77640;79392;107564;113096;113390
P15502-5;P15502-12	P15502-5;P15502-12	14;13	1;1	0;0	Elastin	ELN	Isoform of P15502, Isoform 5 of Elastin;Isoform of P15502, Isoform 12 of Elastin	Core matrisome	ECM Glycoproteins	21645000	0	21645000	0	0	0	0		0	4	0	0	2	1	0	1	8				743	281;345;569;2433;2547;2548;4851;4876;5800;5959;8255;8682;8704;8705	True;False;False;False;False;False;False;False;False;False;False;False;False;False	297;363;600;2576;2699;2700;5152;5180;6234;6399;8845;9290;9313;9314	2457;2458;2459;2460;2461;3213;3214;3215;3216;3217;3218;3219;3220;3221;3222;3223;3224;3225;3226;3227;3228;3229;3230;3231;3232;3233;3234;3235;3236;3237;3238;3239;3240;3241;3242;3243;3244;3245;3246;3247;3248;3249;3250;3251;3252;3253;3254;3255;3256;3257;3258;3259;3260;3261;3262;3263;3264;3265;3266;3267;3268;3269;3270;3271;3272;3273;3274;3275;3276;3277;3278;3279;3280;3281;3282;3283;3284;3285;3286;3287…	2565;2566;2567;2568;2569;2570;2571;2572;3368;3369;3370;3371;3372;3373;3374;3375;3376;3377;3378;3379;3380;3381;3382;3383;3384;3385;3386;3387;3388;3389;3390;3391;3392;3393;3394;3395;3396;3397;3398;3399;3400;3401;3402;3403;3404;3405;3406;3407;3408;3409;3410;3411;3412;3413;3414;3415;3416;3417;3418;3419;3420;3421;3422;3423;3424;3425;3426;3427;3428;3429;3430;3431;3432;3433;3434;3435;3436;3437;3438;3439…	2568;3368;6446;31294;32551;32619;65334;65801;77640;79392;107564;113096;113390;113399
Q15717;Q15717-2;M0QZR9;M0R055;B1AM48;B1APY9;B1APY8;A0A0A0MRX1;A0A0R4J2E6;Q12926-2;Q12926;P26378-4;P26378-2;P26378-5;P26378;P26378-3	Q15717;Q15717-2;M0QZR9	6;6;3;1;1;1;1;1;1;1;1;1;1;1;1;1	6;6;3;1;1;1;1;1;1;1;1;1;1;1;1;1	6;6;3;1;1;1;1;1;1;1;1;1;1;1;1;1	ELAV-like protein 1	ELAVL1	ELAV-like protein 1;Isoform of Q15717, Isoform 2 of ELAV-like protein 1;Isoform of Q15717, ELAV-like protein 1	non matrisome	non matrisome	42118000	0	24761000	0	17357000	0	0		0	5	0	8	0	0	0	0	13				1088	394;1186;3940;5701;7760;8191	True;True;True;True;True;True	413;1257;4192;6129;8322;8775	4080;4081;15553;51283;51284;51285;71819;95439;95440;100228;100229;100230;100231	4304;4305;16660;54890;54891;54892;76527;101667;101668;106720;106721;106722;106723	4305;16660;54890;76527;101667;106722
Q05639	Q05639	10	1	1	Elongation factor 1-alpha 2	EEF1A2	Elongation factor 1-alpha 2	non matrisome	non matrisome	0	0	0	0	0	0	0		0	0	0	1	0	0	0	0	1				1017	1962;3797;4859;5597;5884;6173;6270;6785;7133;7418	False;False;False;False;False;False;False;True;False;False	2074;4037;5162;6013;6320;6634;6740;7280;7643;7951	24191;24192;24193;24194;24195;24196;24197;24198;24199;24200;24201;24202;24203;24204;24205;24206;24207;24208;24209;24210;24211;24212;24213;24214;24215;24216;24217;24218;24219;24220;24221;24222;24223;24224;24225;24226;24227;24228;24229;24230;24231;24232;24233;24234;24235;24236;24237;24238;24239;24240;24241;24242;24243;24244;24245;24246;24247;24248;24249;49541;49542;49543;49544;49545;49546;49547;495…	25917;25918;25919;25920;25921;25922;25923;25924;25925;25926;25927;25928;25929;25930;25931;25932;25933;25934;25935;25936;25937;25938;25939;25940;25941;25942;25943;25944;25945;25946;25947;25948;25949;25950;25951;25952;25953;25954;25955;25956;25957;25958;25959;25960;25961;25962;25963;25964;25965;25966;25967;25968;25969;25970;25971;25972;25973;25974;25975;25976;25977;53081;53082;53083;53084;53085;530…	25936;53083;65499;75222;78778;82081;83600;89217;93539;97358
P24534;C9JZW3;F8WF65;F2Z2G2	P24534	5;2;1;1	4;2;1;1	4;2;1;1	Elongation factor 1-beta	EEF1B2	Elongation factor 1-beta	non matrisome	non matrisome	116724000	0	44078000	0	72646000	0	0		0	8	4	9	0	0	0	0	21				788	4925;6865;6980;7082;8698	False;True;True;True;True	5235;7365;7483;7588;9306	62315;84725;84726;84727;84728;84729;84730;85806;85807;85808;85809;85810;85811;85812;85813;85814;85815;85816;87021;87022;106464	66491;90262;90263;90264;90265;90266;90267;91377;91378;91379;91380;91381;91382;91383;91384;91385;91386;91387;91388;92673;92674;113301	66491;90266;91386;92674;113301
P29692;E9PK01;E9PRY8;P29692-3;P29692-2;E9PPR1;E9PL12;E9PQ49;E9PI39;E9PQZ1;A0A087X1X7;P29692-4;E9PMW7;E9PL71;E9PN91;H0YE58;E9PIZ1;H0YE72;H0YCK7;E9PK06;E9PNW6;E9PQC9;E9PKK3;E9PK72;E9PJD0	P29692;E9PK01;E9PRY8;P29692-3;P29692-2;E9PPR1;E9PL12;E9PQ49;E9PI39;E9PQZ1;A0A087X1X7;P29692-4;E9PMW7;E9PL71	8;7;7;7;7;5;5;5;5;5;5;5;4;4;3;3;3;3;3;2;1;1;1;1;1	8;7;7;7;7;5;5;5;5;5;5;5;4;4;3;3;3;3;3;2;1;1;1;1;1	7;6;6;6;6;5;5;5;5;4;5;4;4;4;3;2;3;2;3;2;1;1;1;1;1	Elongation factor 1-delta	EEF1D	Elongation factor 1-delta;Isoform of P29692, Elongation factor 1-delta (Fragment);Isoform of P29692, Elongation factor 1-delta;Isoform of P29692, Isoform 3 of Elongation factor 1-delta;Isoform of P29692, Isoform 2 of Elongation factor 1-delta;Isoform of P2	non matrisome	non matrisome	111092000	0	42238000	0	55669000	13185000	0		0	6	2	12	1	1	0	0	22				816	717;749;3402;3660;4925;5182;6886;8007	True;True;True;True;True;True;True;True	755;788;3620;3895;5235;5503;7386;8579	7906;7907;8217;44652;44653;44654;44655;44656;44657;47994;47995;47996;47997;47998;62315;65018;84992;98157;98158;98159;98160;98161;98162;98163	8333;8334;8664;47822;47823;47824;47825;47826;47827;51418;51419;51420;51421;51422;66491;69304;90534;104549;104550;104551;104552;104553;104554;104555	8334;8664;47826;51419;66491;69304;90534;104549
P26641;P26641-2	P26641;P26641-2	7;6	7;6	7;6	Elongation factor 1-gamma	EEF1G	Elongation factor 1-gamma;Isoform of P26641, Isoform 2 of Elongation factor 1-gamma	non matrisome	non matrisome	658193000	0	150740000	215160000	194550000	97743000	0		1	17	5	20	7	5	2	2	59				800	35;2321;3908;4402;6288;7110;7346	True;True;True;True;True;True;True	36;2455;4157;4681;6760;7618;7876	293;294;295;296;297;298;27898;27899;27900;27901;27902;27903;50860;50861;50862;50863;50864;50865;50866;50867;50868;50869;50870;50871;50872;50873;50874;50875;56405;56406;56407;56408;56409;56410;56411;56412;78734;78735;78736;78737;78738;78739;87382;87383;87384;87385;87386;87387;87388;87389;87390;90399;90400;90401;90402;90403;90404;90405;90406	302;303;304;305;306;307;29824;29825;29826;29827;29828;29829;29830;54456;54457;54458;54459;54460;54461;54462;54463;54464;54465;54466;54467;54468;54469;54470;54471;60294;60295;60296;60297;60298;60299;60300;60301;83850;83851;83852;83853;83854;83855;93043;93044;93045;93046;93047;93048;93049;93050;93051;96276;96277;96278;96279;96280;96281;96282;96283	307;29824;54463;60295;83850;93046;96281
P13639	P13639	22	22	21	Elongation factor 2	EEF2	Elongation factor 2	non matrisome	non matrisome	362095000	0	116540000	24683000	201360000	19512000	0		0	27	6	32	4	7	0	1	77				729	305;864;1431;1613;1906;1929;2255;2827;2953;3186;3388;3957;5605;6700;7122;7334;7405;7438;7918;7946;8219;8666	True;True;True;True;True;True;True;True;True;True;True;True;True;True;True;True;True;True;True;True;True;True	322;910;1512;1708;2016;2039;2383;3007;3146;3390;3606;4210;6027;7194;7631;7863;7938;7971;8489;8518;8808;9274	2844;2845;2846;2847;9579;17813;17814;17815;17816;17817;17818;17819;17820;20279;23269;23270;23604;23605;23606;23607;23608;23609;23610;23611;23612;27332;27333;34060;34061;34062;34063;37108;37109;41009;44463;44464;44465;44466;44467;44468;44469;44470;44471;44472;44473;44474;44475;51549;70795;83200;83201;87656;87657;87658;90336;90337;90338;91159;91160;91161;91162;91163;91570;97153;97154;97155;97156;97…	2979;2980;2981;2982;10097;19052;19053;19054;19055;19056;19057;19058;19059;19060;21778;24917;24918;25272;25273;25274;25275;25276;25277;25278;25279;25280;29244;29245;36344;36345;36346;36347;39738;39739;43827;47595;47596;47597;47598;47599;47600;47601;47602;47603;47604;47605;47606;47607;47608;55194;75443;88605;88606;93341;93342;93343;96210;96211;96212;97123;97124;97125;97126;97127;97128;97577;103492;…	2979;10097;19056;21778;24917;25274;29244;36346;39739;43827;47608;55194;75443;88605;93343;96210;97126;97577;103495;103737;107131;112889
P49411	P49411	6	6	6	Elongation factor Tu, mitochondrial	TUFM	Elongation factor Tu, mitochondrial	non matrisome	non matrisome	60619000	0	24227000	0	36392000	0	0		1	6	0	11	2	1	0	0	21				884	171;2073;3027;4666;5791;7716	True;True;True;True;True;True	183;2195;3221;4956;6225;8276	1666;1667;1668;1669;1670;25477;25478;25479;25480;25481;25482;37955;37956;59070;59071;59072;59073;59074;59075;72749;94803	1750;1751;1752;1753;1754;27298;27299;27300;27301;27302;27303;40628;40629;63102;63103;63104;63105;63106;63107;77519;101002	1751;27300;40628;63107;77519;101002
A0A0C4DFX3;Q9Y6C2;A0A0A0MT20;Q9Y6C2-2	A0A0C4DFX3;Q9Y6C2	54;53;19;19	54;53;19;19	54;53;19;19	EMILIN-1	EMILIN1	Isoform of Q9Y6C2, EMILIN-1;EMILIN-1	Core matrisome	ECM Glycoproteins	46552100000	8170700000	6724200000	5740100000	9377200000	8948300000	7591600000		100	168	77	173	191	163	129	148	1149				98	562;788;1085;1480;1566;1567;2564;2927;2928;3055;3176;3324;3374;3520;3574;3603;3870;4293;4297;4413;4418;4451;4570;4573;4602;4660;4897;4911;4912;4936;4937;5140;5143;5728;5756;6005;6224;6233;6415;6444;6445;6511;6512;6591;6746;7698;7709;7854;7869;8109;8147;8296;8756;8757	True;True;True;True;True;True;True;True;True;True;True;True;True;True;True;True;True;True;True;True;True;True;True;True;True;True;True;True;True;True;True;True;True;True;True;True;True;True;True;True;True;True;True;True;True;True;True;True;True;True;True;True;True;True	593;828;1149;1562;1655;1656;2718;3118;3119;3249;3380;3537;3591;3743;3801;3836;4119;4566;4570;4692;4697;4731;4855;4858;4890;4950;5202;5220;5221;5248;5249;5461;5464;6159;6189;6450;6687;6699;6892;6923;6924;6994;6995;7077;7240;8256;8268;8269;8423;8438;8687;8726;8886;9366;9367	6052;6053;6054;6055;6056;6057;6058;6059;6060;6061;6062;6063;6064;6065;6066;6067;6068;6069;6070;6071;6072;6073;6074;6075;6076;6077;6078;6079;6080;8595;8596;8597;8598;8599;8600;8601;8602;8603;8604;8605;8606;8607;8608;14178;14179;14180;14181;14182;18426;18427;18428;18429;19708;19709;19710;19711;19712;19713;19714;19715;19716;19717;19718;19719;19720;19721;19722;19723;30678;30679;30680;30681;30682;3068…	6358;6359;6360;6361;6362;6363;6364;6365;6366;6367;6368;6369;6370;6371;6372;6373;6374;6375;6376;6377;6378;6379;6380;6381;6382;6383;6384;6385;6386;6387;6388;9053;9054;9055;9056;9057;9058;9059;9060;9061;9062;9063;9064;9065;9066;9067;9068;15136;15137;15138;15139;15140;19707;19708;19709;19710;19711;21168;21169;21170;21171;21172;21173;21174;21175;21176;21177;21178;21179;21180;21181;21182;21183;21184;32…	6365;9062;15137;19707;21174;21184;32780;39360;39423;40935;43763;46729;47416;49452;50092;50800;54187;58919;58944;60399;60416;60670;61974;62013;62481;63033;65954;66233;66261;66656;66670;68862;68888;76772;77147;79845;82743;82957;85295;85706;85713;86452;86455;87329;88904;100757;100983;102746;102941;105850;106357;108243;113986;113997	50	116
Q9BXX0	Q9BXX0	15	15	15	EMILIN-2	EMILIN2	EMILIN-2	Core matrisome	ECM Glycoproteins	569542000	127670000	105410000	152330000	77673000	58736000	47723000		6	16	13	10	23	7	6	6	87				1210	291;726;727;1945;2556;2708;3677;4034;4036;4411;4651;4943;5727;7690;8303	True;True;True;True;True;True;True;True;True;True;True;True;True;True;True	307;764;765;2055;2708;2879;3912;4294;4296;4690;4940;5256;6158;8248;8894	2650;2651;2652;8096;8097;8098;8099;8100;8101;8102;8103;8104;23736;23737;30593;32189;32190;48187;48188;52449;52457;52458;52459;52460;52461;52462;52463;52464;56467;56468;56469;56470;56471;56472;56473;58941;58942;58943;62528;62529;62530;62531;62532;62533;62534;62535;62536;62537;62538;62539;62540;62541;62542;62543;62544;62545;62546;72017;72018;72019;72020;72021;72022;72023;72024;72025;72026;72027;720…	2777;2778;2779;8542;8543;8544;8545;8546;8547;8548;8549;8550;25432;25433;32670;34341;34342;51626;51627;56155;56163;56164;56165;56166;56167;56168;56169;56170;60361;60362;60363;60364;60365;60366;60367;62968;62969;62970;66711;66712;66713;66714;66715;66716;66717;66718;66719;66720;66721;66722;66723;66724;66725;66726;66727;66728;66729;76733;76734;76735;76736;76737;76738;76739;76740;76741;76742;76743;767…	2777;8543;8544;25432;32670;34341;51626;56155;56164;60366;62970;66720;76735;100723;108413
Q9NT22;Q9NT22-2	Q9NT22	10;2	10;2	10;2	EMILIN-3	EMILIN3	EMILIN-3	Core matrisome	ECM Glycoproteins	490851000	85473000	46407000	0	79781000	120900000	158290000		3	3	1	5	7	5	13	12	49				1233	3177;3181;3188;4338;4478;4920;5753;7708;8019;8843	True;True;True;True;True;True;True;True;True;True	3381;3385;3392;4612;4761;5230;6186;8267;8592;9457	40953;40972;41014;41015;41016;41017;41018;41019;55413;57131;57132;57133;57134;62254;62255;62256;72351;94708;94709;94710;94711;94712;94713;94714;94715;94716;94717;94718;94719;94720;94721;94722;94723;94724;94725;94726;94727;94728;94729;94730;94731;98361;108421;108422;108423;108424;108425;108426;108427;108428;108429;108430;108431	43771;43790;43832;43833;43834;43835;43836;43837;59257;61062;61063;61064;61065;66429;66430;66431;77095;100900;100901;100902;100903;100904;100905;100906;100907;100908;100909;100910;100911;100912;100913;100914;100915;100916;100917;100918;100919;100920;100921;100922;100923;104772;115365;115366;115367;115368;115369;115370;115371;115372;115373;115374;115375	43771;43790;43835;59257;61062;66430;77095;100912;104772;115373
Q99961-2;Q99961;M0QYE0;M0R0I3;Q99961-3;M0R2K6	Q99961-2;Q99961;M0QYE0;M0R0I3;Q99961-3	3;3;2;2;2;1	3;3;2;2;2;1	3;3;2;2;2;1	Endophilin-A2	SH3GL1	Isoform of Q99961, Isoform 2 of Endophilin-A2;Endophilin-A2;Isoform of Q99961, Endophilin-A2 (Fragment);Isoform of Q99961, Endophilin-A2 (Fragment);Isoform of Q99961, Isoform 3 of Endophilin-A2	non matrisome	non matrisome	15859000	0	0	0	15859000	0	0		0	1	0	3	0	0	0	0	4				1195	831;6008;6199	True;True;True	873;6453;6662	9225;74972;74973;77427	9720;79857;79858;82486	9720;79858;82486
B7ZC39;B7ZC38;Q9NR46;Q9NR46-2;F8WFB9;H7C1Z6	B7ZC39;B7ZC38;Q9NR46;Q9NR46-2;F8WFB9	3;3;3;3;2;1	3;3;3;3;2;1	3;3;3;3;2;1	Endophilin-B2	SH3GLB2	Isoform of Q9NR46, Endophilin-B2;Isoform of Q9NR46, Endophilin-B2;Endophilin-B2;Isoform of Q9NR46, Isoform 2 of Endophilin-B2;Isoform of Q9NR46, Endophilin-B2	non matrisome	non matrisome	2020400	0	0	0	2020400	0	0		0	0	0	3	0	0	0	1	4				196	7310;7875;8277	True;True;True	7837;8445;8867	90091;96675;101465;101466	95954;102993;108065;108066	95954;102993;108065
P30040;F8VY02;P30040-2	P30040;F8VY02;P30040-2	2;1;1	2;1;1	2;1;1	Endoplasmic reticulum resident protein 29	ERP29	Endoplasmic reticulum resident protein 29;Isoform of P30040, Endoplasmic reticulum resident protein 29;Isoform of P30040, Isoform 2 of Endoplasmic reticulum resident protein 29	non matrisome	non matrisome	50806000	0	0	32152000	18654000	0	0		0	3	3	6	0	0	0	0	12				817	2713;6938	True;True	2884;7440	32243;32244;32245;32246;32247;32248;85414;85415;85416;85417;85418;85419	34395;34396;34397;34398;34399;34400;90966;90967;90968;90969;90970;90971	34399;90970
P14625;Q96GW1;Q58FF3;F8W026;H0YIV0	P14625	18;7;4;2;2	17;6;4;1;2	17;6;4;1;2	Endoplasmin	HSP90B1	Endoplasmin	non matrisome	non matrisome	410100000	0	193490000	0	216610000	0	0		0	30	5	30	0	0	1	0	66				738	1401;1863;1879;2061;2340;2560;3066;3396;4207;4583;4626;5568;6817;6858;7274;7326;7338;8785	True;True;True;False;True;True;True;True;True;True;True;True;True;True;True;True;True;True	1481;1972;1989;2182;2474;2712;3261;3614;4476;4869;4915;5981;7314;7357;7797;7854;7867;9398	17613;17614;17615;22932;22933;23019;25428;25429;25430;25431;25432;25433;25434;25435;25436;25437;25438;28077;28078;28079;28080;28081;28082;28083;28084;30648;30649;30650;30651;30652;30653;30654;38450;38451;38452;44537;44538;44539;44540;44541;44542;54387;58150;58151;58152;58153;58154;58813;58814;58815;58816;70150;70151;70152;70153;70154;70155;70156;70157;84219;84704;84705;84706;84707;84708;84709;847…	18847;18848;18849;24552;24553;24643;27249;27250;27251;27252;27253;27254;27255;27256;27257;27258;27259;30010;30011;30012;30013;30014;30015;30016;30017;32726;32727;32728;32729;32730;32731;32732;32733;32734;41139;41140;41141;47682;47683;47684;47685;47686;47687;58185;62146;62147;62148;62149;62150;62836;62837;62838;62839;74781;74782;74783;74784;74785;74786;74787;74788;89727;90241;90242;90243;90244;902…	18847;24553;24643;27254;30013;32732;41140;47683;58185;62147;62837;74782;89727;90245;95666;96106;96225;114470
P84090;G3V279	P84090	3;1	3;1	3;1	Enhancer of rudimentary homolog	ERH	Enhancer of rudimentary homolog	non matrisome	non matrisome	120140000	0	0	120140000	0	0	0		0	6	5	5	0	0	0	0	16				995	155;4223;6830	True;True;True	165;4494;7328	1609;54610;84336;84337;84338;84339;84340;84341;84342;84343;84344;84345;84346;84347;84348	1689;58413;89851;89852;89853;89854;89855;89856;89857;89858;89859;89860;89861;89862;89863;89864	1689;58413;89863
P12724	P12724	4	4	4	Eosinophil cationic protein	RNASE3	Eosinophil cationic protein	non matrisome	non matrisome	0	0	0	0	0	0	0		0	0	0	0	10	1	0	0	11				721	2691;5656;7647;8806	True;True;True;True	2861;6080;8200;9420	32068;32069;32070;71356;93955;93956;93957;93958;93959;107842;107843;107844	34219;34220;34221;76026;100094;100095;100096;100097;100098;100099;114746;114747;114748	34220;76026;100099;114747
P11678	P11678	25	25	24	Eosinophil peroxidase;Eosinophil peroxidase light chain;Eosinophil peroxidase heavy chain	EPX	Eosinophil peroxidase	non matrisome	non matrisome	0	0	0	0	0	0	0		0	0	0	0	61	0	0	0	61				710	669;824;825;1209;1299;2368;2445;3081;3805;3841;3955;4193;4825;4832;4833;5494;5539;6025;6026;6370;6424;6494;7244;7552;7776	True;True;True;True;True;True;True;True;True;True;True;True;True;True;True;True;True;True;True;True;True;True;True;True;True	707;866;867;1280;1376;2503;2591;3276;4045;4046;4087;4208;4462;5125;5132;5133;5904;5951;6471;6472;6843;6901;6976;7766;8102;8340	7279;9184;9185;9186;15672;15673;15674;16564;16565;28398;28399;28400;29452;38696;49615;49616;49617;49618;49619;49620;50275;50276;50277;50278;51547;54203;54204;54205;54206;61006;61007;61008;61009;61051;61052;61053;69030;69031;69032;69660;69661;69662;75162;75163;79698;80213;80214;80215;80216;80896;89460;89461;89462;89463;89464;92975;92976;92977;95499;95500	7667;9679;9680;9681;16786;16787;16788;17733;17734;30339;30340;30341;31485;41389;53155;53156;53157;53158;53159;53160;53842;53843;53844;53845;55192;57993;57994;57995;57996;65106;65107;65108;65109;65153;65154;65155;73609;73610;73611;74272;74273;74274;80057;80058;80059;84875;85414;85415;85416;85417;86112;95269;95270;95271;95272;95273;99046;99047;99048;101730;101731	7667;9679;9681;16787;17733;30339;31485;41389;53158;53844;55192;57993;65106;65153;65155;73610;74274;80058;80059;84875;85414;86112;95272;99046;101731	177;358;359;360;361;362;363	422;425;476;481;523;535;560
Q9UHF1;R4GMT3	Q9UHF1	3;1	3;1	3;1	Epidermal growth factor-like protein 7	EGFL7	Epidermal growth factor-like protein 7	Matrisome-associated	Secreted Factors	27252000	0	0	0	0	0	27252000		0	1	2	2	5	2	1	5	18				1248	6991;8549;8617	True;True;True	7494;9154;9222	85960;85961;85962;85963;85964;85965;85966;85967;85968;85969;85970;85971;104723;104724;104725;105485;105486;105487;105488;105489	91534;91535;91536;91537;91538;91539;91540;91541;91542;91543;91544;91545;111476;111477;111478;112259;112260;112261;112262;112263	91537;111476;112260
B0QZ43;E5RHW4;O94905;O75477	B0QZ43;E5RHW4;O94905;O75477	1;1;1;1	1;1;1;1	1;1;1;1	Erlin-2;Erlin-1	ERLIN1;ERLIN2	Isoform of O75477, Erlin-1 (Fragment);Isoform of O94905, Erlin-2 (Fragment);Erlin-2;Erlin-1	non matrisome	non matrisome	0	0	0	0	0	0	0		0	0	0	1	0	0	0	0	1				159	4065	TRUE	4325	52762	56482	56482
H3BTE6;F5H563;P16452-3;P16452;P16452-2;H3BUR1;H3BPV8	H3BTE6;F5H563;P16452-3;P16452;P16452-2;H3BUR1;H3BPV8	2;2;2;2;2;1;1	2;2;2;2;2;1;1	2;2;2;2;2;1;1	Erythrocyte membrane protein band 4.2	EPB42	Isoform of P16452, Erythrocyte membrane protein band 4.2 (Fragment);Isoform of P16452, Erythrocyte membrane protein band 4.2;Isoform of P16452, Isoform 3 of Erythrocyte membrane protein band 4.2;Erythrocyte membrane protein band 4.2;Isoform of P16452, Isof	non matrisome	non matrisome	7857800	0	0	0	0	7857800	0		0	0	0	0	0	2	0	0	2				354	8521;8795	True;True	9126;9408	104565;107704	111314;114595	111314;114595
P60842;J3KT12;P60842-2;J3KTB5;J3QS69;J3QR64;J3KSZ0;J3QL43;J3QLN6;J3KTN0;J3QKZ9;J3KS25;E7EQG2;Q14240;Q14240-2;J3KSN7;C9JUF0;J3QL52;J3KT04;J3KS93;J3QQP0;E9PBH4;F8WE11;E7EMV8	P60842;J3KT12;P60842-2;J3KTB5;J3QS69;J3QR64;J3KSZ0;J3QL43	11;9;9;8;7;6;6;6;5;4;4;4;4;4;4;2;1;1;1;1;1;1;1;1	11;9;9;8;7;6;6;6;5;4;4;4;4;4;4;2;1;1;1;1;1;1;1;1	10;8;8;7;6;5;6;5;4;4;3;3;3;3;3;1;0;1;0;0;0;0;0;0	Eukaryotic initiation factor 4A-I	EIF4A1	Eukaryotic initiation factor 4A-I;Isoform of P60842, Eukaryotic initiation factor 4A-I;Isoform of P60842, Isoform 2 of Eukaryotic initiation factor 4A-I;Isoform of P60842, Eukaryotic initiation factor 4A-I (Fragment);Isoform of P60842, Eukaryotic initiatio	non matrisome	non matrisome	261386000	0	53314000	41352000	166720000	0	0		1	14	5	19	0	2	1	1	43				929	752;1291;1536;1854;2032;3039;3353;4230;4931;5310;8141	True;True;True;True;True;True;True;True;True;True;True	791;1368;1622;1963;2152;3233;3567;4501;5242;5659;5660;8720	8291;8292;8293;8294;8295;8296;8297;16518;16519;16520;19082;19083;19084;19085;22881;22882;25246;38040;38041;38042;38043;38044;38045;44020;44021;44022;54662;62393;66711;66712;66713;66714;99805;99806;99807;99808;99809;99810;99811;99812;99813;99814;99815;99816;99817;99818	8740;8741;8742;8743;8744;8745;8746;17686;17687;17688;20427;20428;20429;20430;24501;24502;27062;40715;40716;40717;40718;40719;40720;47119;47120;47121;58465;66570;71098;71099;71100;71101;71102;106293;106294;106295;106296;106297;106298;106299;106300;106301;106302;106303;106304;106305;106306	8743;17687;20429;24502;27062;40720;47121;58465;66570;71102;106296	537	178
P38919;I3L3H2	P38919	9;3	8;2	8;2	Eukaryotic initiation factor 4A-III;Eukaryotic initiation factor 4A-III, N-terminally processed	EIF4A3	Eukaryotic initiation factor 4A-III	non matrisome	non matrisome	91011000	0	45401000	0	45610000	0	0		0	13	1	11	0	0	0	0	25				853	759;2034;2249;3039;3246;4420;5345;6074;6345	True;True;True;False;True;True;True;True;True	798;2154;2377;3233;3453;4699;5711;5712;6527;6817	8343;8344;25251;25252;25253;27291;27292;27293;27294;27295;27296;27297;38040;38041;38042;38043;38044;38045;42513;56535;56536;56537;56538;56539;67139;67140;67141;67142;75766;79438	8796;8797;27067;27068;27069;29201;29202;29203;29204;29205;29206;29207;40715;40716;40717;40718;40719;40720;45506;60430;60431;60432;60433;60434;60435;71561;71562;71563;71564;80691;84599;84600	8796;27067;29207;40720;45506;60434;71561;80691;84600	494	183
H0YJS4;G3V4T5;P05198	H0YJS4;G3V4T5;P05198	1;1;1	1;1;1	1;1;1	Eukaryotic translation initiation factor 2 subunit 1	EIF2S1	Isoform of P05198, Eukaryotic translation initiation factor 2 subunit 1 (Fragment);Isoform of P05198, Eukaryotic translation initiation factor 2 subunit 1 (Fragment);Eukaryotic translation initiation factor 2 subunit 1	non matrisome	non matrisome	5271900	0	0	0	5271900	0	0		0	0	0	2	0	0	0	0	2				387	1248	TRUE	1321	16004	17153;17154	17153
P20042	P20042	2	2	2	Eukaryotic translation initiation factor 2 subunit 2	EIF2S2	Eukaryotic translation initiation factor 2 subunit 2	non matrisome	non matrisome	9451800	0	0	0	9451800	0	0		0	1	0	2	0	0	0	0	3				761	2543;3761	True;True	2695;3999	30404;49189;49190	32472;52708;52709	32472;52708
Q14152-2;Q14152	Q14152-2;Q14152	3;3	3;3	3;3	Eukaryotic translation initiation factor 3 subunit A	EIF3A	Isoform of Q14152, Isoform 2 of Eukaryotic translation initiation factor 3 subunit A;Eukaryotic translation initiation factor 3 subunit A	non matrisome	non matrisome	7155700	0	0	0	7155700	0	0		0	0	0	3	0	0	0	0	3				1056	3806;4673;4733	True;True;True	4047;4963;5023	49621;59098;59786	53161;63131;63849	53161;63131;63849
Q99613-2;Q99613;B5ME19	Q99613-2;Q99613;B5ME19	1;1;1	1;1;1	1;1;1	Eukaryotic translation initiation factor 3 subunit C;Eukaryotic translation initiation factor 3 subunit C-like protein	EIF3C;EIF3CL	Isoform of Q99613, Isoform 2 of Eukaryotic translation initiation factor 3 subunit C;Eukaryotic translation initiation factor 3 subunit C;Eukaryotic translation initiation factor 3 subunit C-like protein	non matrisome	non matrisome	5202700	0	0	0	5202700	0	0		0	1	0	2	0	0	0	0	3				191	2067	TRUE	2188	25455;25456;25457	27276;27277;27278	27278
K7ER90;K7EL20;K7ENA8;O75821	K7ER90;K7EL20;K7ENA8;O75821	1;1;1;1	1;1;1;1	1;1;1;1	Eukaryotic translation initiation factor 3 subunit G	EIF3G	Isoform of O75821, Eukaryotic translation initiation factor 3 subunit G (Fragment);Isoform of O75821, Eukaryotic translation initiation factor 3 subunit G (Fragment);Isoform of O75821, Eukaryotic translation initiation factor 3 subunit G (Fragment);Eukaryo	non matrisome	non matrisome	0	0	0	0	0	0	0		0	0	0	1	0	0	0	0	1				473	8432	TRUE	9029	103091	109782	109782
O75822-2;O75822-3;O75822	O75822-2;O75822-3;O75822	1;1;1	1;1;1	1;1;1	Eukaryotic translation initiation factor 3 subunit J	EIF3J	Isoform of O75822, Isoform 2 of Eukaryotic translation initiation factor 3 subunit J;Isoform of O75822, Isoform 3 of Eukaryotic translation initiation factor 3 subunit J;Eukaryotic translation initiation factor 3 subunit J	non matrisome	non matrisome	0	0	0	0	0	0	0		0	0	0	1	0	0	0	0	1				552	8183	TRUE	8763	100084	106573	106573
B0QY89;Q9Y262-2;Q9Y262;H7C3A0;C9JHP4;C9K0Q7;B0QY90	B0QY89;Q9Y262-2;Q9Y262;H7C3A0;C9JHP4;C9K0Q7;B0QY90	4;4;4;2;2;2;2	4;4;4;2;2;2;2	4;4;4;2;2;2;2	Eukaryotic translation initiation factor 3 subunit L	EIF3L	Isoform of Q9Y262, Eukaryotic translation initiation factor 3 subunit L;Isoform of Q9Y262, Isoform 2 of Eukaryotic translation initiation factor 3 subunit L;Eukaryotic translation initiation factor 3 subunit L;Isoform of Q9Y262, Eukaryotic translation init	non matrisome	non matrisome	4514500	0	0	0	4514500	0	0		0	1	0	2	0	0	0	0	3				158	4023;6718;7699;8369	True;True;True;True	4283;7212;8257;8961	52310;83341;94579;102408	56013;88756;100760;109068	56013;88756;100760;109068
E9PN86;E7ESM3;J3KNJ2;Q7L2H7	E9PN86;E7ESM3;J3KNJ2;Q7L2H7	1;1;1;1	1;1;1;1	1;1;1;1	Eukaryotic translation initiation factor 3 subunit M	EIF3M	Isoform of Q7L2H7, Eukaryotic translation initiation factor 3 subunit M (Fragment);Isoform of Q7L2H7, Eukaryotic translation initiation factor 3 subunit M;Isoform of Q7L2H7, Eukaryotic translation initiation factor 3 subunit M (Fragment);Eukaryotic transla	non matrisome	non matrisome	0	0	0	0	0	0	0		0	0	0	1	0	0	0	0	1				301	6045	TRUE	6497	75406	80307	80307
E7EX73;E9PGM1;E7EUU4;Q04637-5;Q04637-4;Q04637-3;Q04637;Q04637-8;Q04637-9;C9J6B6;C9J2Z7;C9K073;C9JF13;Q04637-6;Q04637-7;F8WCF2;C9JHW9;H7C0V6	E7EX73;E9PGM1;E7EUU4;Q04637-5;Q04637-4;Q04637-3;Q04637;Q04637-8;Q04637-9;C9J6B6;C9J2Z7;C9K073;C9JF13;Q04637-6;Q04637-7	4;4;4;4;4;4;4;4;4;3;3;3;3;3;3;1;1;1	4;4;4;4;4;4;4;4;4;3;3;3;3;3;3;1;1;1	4;4;4;4;4;4;4;4;4;3;3;3;3;3;3;1;1;1	Eukaryotic translation initiation factor 4 gamma 1	EIF4G1	Isoform of Q04637, Eukaryotic translation initiation factor 4 gamma 1;Isoform of Q04637, Eukaryotic translation initiation factor 4 gamma 1;Isoform of Q04637, Eukaryotic translation initiation factor 4 gamma 1;Isoform of Q04637, Isoform D of Eukaryotic tra	non matrisome	non matrisome	6869100	0	0	0	6869100	0	0		0	0	1	2	0	0	0	0	3				306	1402;1781;1883;3373	True;True;True;True	1482;1888;1993;3590	17616;22274;23030;44276	18850;23872;24654;47381	18850;23872;24654;47381
H0Y3P2;D3DQV9;P78344-2;P78344;H0YEC5;H0YD77;H0YCH5;E9PKF8;H0YE44;H0YEN8;H0YDC0;H0YCF8	H0Y3P2;D3DQV9;P78344-2;P78344;H0YEC5;H0YD77;H0YCH5	5;5;5;5;3;3;3;2;1;1;1;1	5;5;5;5;3;3;3;2;1;1;1;1	5;5;5;5;3;3;3;2;1;1;1;1	Eukaryotic translation initiation factor 4 gamma 2	EIF4G2	Isoform of P78344, Eukaryotic translation initiation factor 4 gamma 2;Isoform of P78344, Eukaryotic translation initiation factor 4 gamma 2 (Fragment);Isoform of P78344, Isoform 2 of Eukaryotic translation initiation factor 4 gamma 2;Eukaryotic translation	non matrisome	non matrisome	4080900	0	0	0	4080900	0	0		0	0	0	6	0	0	0	0	6				263	709;4291;4357;6360;8057	True;True;True;True;True	747;4564;4632;6832;8631	7819;55076;55681;79674;98831;98832	8244;58908;59530;84851;105270;105271	8244;58908;59530;84851;105270
F8W0K0;F8VYE9;F8VSC7;F8VP89;F8VX11;E7EX17;P23588;F8VRU1;P23588-2	F8W0K0;F8VYE9;F8VSC7;F8VP89;F8VX11;E7EX17;P23588;F8VRU1;P23588-2	3;3;3;3;3;3;3;2;2	3;3;3;3;3;3;3;2;2	3;3;3;3;3;3;3;2;2	Eukaryotic translation initiation factor 4B	EIF4B	Isoform of P23588, Eukaryotic translation initiation factor 4B (Fragment);Isoform of P23588, Eukaryotic translation initiation factor 4B;Isoform of P23588, Eukaryotic translation initiation factor 4B;Isoform of P23588, Eukaryotic translation initiation fac	non matrisome	non matrisome	5962400	0	0	0	5962400	0	0		0	0	0	2	0	0	0	0	2				308	3083;4053;6859	True;True;True	3278;4313;7358	38711;52695;84711	41405;56411;90248	41405;56411;90248
D6RBW1;P06730;P06730-3;P06730-2;H0Y8J7	D6RBW1;P06730;P06730-3;P06730-2;H0Y8J7	2;2;2;2;1	2;2;2;2;1	2;2;2;2;1	Eukaryotic translation initiation factor 4E	EIF4E	Isoform of P06730, Eukaryotic translation initiation factor 4E;Eukaryotic translation initiation factor 4E;Isoform of P06730, Isoform 3 of Eukaryotic translation initiation factor 4E;Isoform of P06730, Isoform 2 of Eukaryotic translation initiation factor	non matrisome	non matrisome	1549700	0	1549700	0	0	0	0		0	1	0	1	0	0	0	0	2				274	1316;4172	True;True	1394;4440	16857;54017	18032;57796	18032;57796
Q15056-2;Q15056	Q15056-2;Q15056	3;3	3;3	3;3	Eukaryotic translation initiation factor 4H	EIF4H	Isoform of Q15056, Isoform Short of Eukaryotic translation initiation factor 4H;Eukaryotic translation initiation factor 4H	non matrisome	non matrisome	33070000	0	0	0	33070000	0	0		0	2	0	4	0	0	0	1	7				1070	1763;2885;7677	True;True;True	1870;3072;8235	22126;22127;22128;35645;35646;35647;35648;94361	23709;23710;23711;38104;38105;38106;38107;100519	23710;38107;100519
I3L397;I3L504;P63241;P63241-2;F8WCJ1;C9J7B5;C9J4W5;Q9GZV4;Q6IS14	I3L397;I3L504;P63241;P63241-2;F8WCJ1;C9J7B5;C9J4W5;Q9GZV4	3;3;3;3;2;2;2;2;1	3;3;3;3;2;2;2;2;1	3;3;3;3;2;2;2;2;1	Eukaryotic translation initiation factor 5A;Eukaryotic translation initiation factor 5A-1;Eukaryotic translation initiation factor 5A-2	EIF5A;EIF5A2	Isoform of P63241, Eukaryotic translation initiation factor 5A (Fragment);Isoform of P63241, Eukaryotic translation initiation factor 5A-1;Eukaryotic translation initiation factor 5A-1;Isoform of P63241, Isoform 2 of Eukaryotic translation initiation facto	non matrisome	non matrisome	120131000	0	48869000	0	39135000	14321000	17806000		1	6	3	7	3	3	0	2	25				445	1817;4162;8027	True;True;True	1925;4429;8600	22671;22672;22673;22674;53889;98451;98452;98453;98454;98455;98456;98457;98458;98459;98460;98461;98462;98463;98464;98465;98466;98467;98468;98469;98470;98471	24288;24289;24290;24291;57667;104866;104867;104868;104869;104870;104871;104872;104873;104874;104875;104876;104877;104878;104879;104880;104881;104882;104883;104884;104885;104886;104887	24289;57667;104873
A0A087WUT6;O60841	A0A087WUT6;O60841	2;2	2;2	2;2	Eukaryotic translation initiation factor 5B	EIF5B	Isoform of O60841, Eukaryotic translation initiation factor 5B;Eukaryotic translation initiation factor 5B	non matrisome	non matrisome	10758000	0	0	0	10758000	0	0		0	0	0	3	0	0	0	0	3				32	151;2045	True;True	161;2166	1571;25337	1649;1650;27157	1649;27157
Q16394	Q16394	2	2	2	Exostosin-1	EXT1	Exostosin-1	non matrisome	non matrisome	17185600	0	0	0	9268200	7917400	0		0	1	0	2	5	3	0	1	12				1093	4178;4731	True;True	4446;5021	54095;54096;54097;54098;54099;59749;59750;59751;59752;59753;59754;59755	57879;57880;57881;57882;57883;63811;63812;63813;63814;63815;63816;63817	57881;63811
O14980	O14980	3	3	3	Exportin-1	XPO1	Exportin-1	non matrisome	non matrisome	2592800	0	0	0	2592800	0	0		0	1	0	2	0	0	0	0	3				508	794;2504;4214	True;True;True	834;2653;4485	8765;30029;54552	9249;32087;58354	9249;32087;58354
P55060-3;P55060;P55060-4	P55060-3;P55060;P55060-4	2;2;1	2;2;1	2;2;1	Exportin-2	CSE1L	Isoform of P55060, Isoform 3 of Exportin-2;Exportin-2;Isoform of P55060, Isoform 4 of Exportin-2	non matrisome	non matrisome	5185800	0	5185800	0	0	0	0		0	2	0	1	0	0	0	0	3				919	3988;4760	True;True	4244;5050	51910;59954;59955	55571;64022;64023	55571;64023
Q16610;Q16610-4;Q16610-2;Q16610-3	Q16610;Q16610-4;Q16610-2	13;13;8;2	13;13;8;2	13;13;8;2	Extracellular matrix protein 1	ECM1	Extracellular matrix protein 1;Isoform of Q16610, Isoform 4 of Extracellular matrix protein 1;Isoform of Q16610, Isoform 2 of Extracellular matrix protein 1	Core matrisome	ECM Glycoproteins	552290000	133910000	101720000	0	142780000	173880000	0		4	12	0	17	15	21	11	7	87				1094	846;889;2064;2575;3551;4741;5072;5073;5216;5573;5702;6091;8433	True;True;True;True;True;True;True;True;True;True;True;True;True	888;935;2185;2729;3775;5031;5390;5391;5538;5539;5988;6130;6547;9030;9031	9355;9940;9941;9942;9943;9944;9945;9946;9947;25449;30865;30866;30867;30868;30869;30870;30871;30872;30873;30874;30875;30876;30877;30878;30879;30880;30881;30882;30883;30884;30885;30886;30887;46502;59810;63910;63911;63912;63913;63914;63915;63916;63917;63918;63919;63920;63921;63922;63923;63924;65529;65530;65531;65532;65533;65534;65535;70231;70232;70233;70234;70235;70236;70237;70238;70239;70240;71820;…	9855;10488;10489;10490;10491;10492;10493;10494;10495;27270;32948;32949;32950;32951;32952;32953;32954;32955;32956;32957;32958;32959;32960;32961;32962;32963;32964;32965;32966;32967;32968;32969;32970;32971;49816;63873;68155;68156;68157;68158;68159;68160;68161;68162;68163;68164;68165;68166;68167;68168;68169;69851;69852;69853;69854;69855;69856;69857;74863;74864;74865;74866;74867;74868;74869;74870;7487…	9855;10490;27270;32970;49816;63873;68155;68169;69856;74872;76530;80816;109784	666;667	241;422
Q8IWU6;A0A087WWR8	Q8IWU6;A0A087WWR8	10;9	10;9	10;9	Extracellular sulfatase Sulf-1	SULF1	Extracellular sulfatase Sulf-1;Isoform of Q8IWU6, Extracellular sulfatase Sulf-1	Matrisome-associated	ECM Regulators	572578000	102820000	122790000	0	97188000	153330000	96450000		3	17	1	11	21	15	4	9	81				1141	1627;1978;2036;3203;3493;4202;4946;6468;6967;8821	True;True;True;True;True;True;True;True;True;True	1722;2094;2156;3409;3714;4471;5259;5260;6947;7470;9435	20371;20372;20373;20374;20375;20376;20377;20378;20379;20380;20381;20382;20383;20384;20385;20386;20387;20388;24484;25257;41244;41245;41246;41247;41248;41249;41250;41251;41252;41253;41254;41255;41256;41257;41258;41259;41260;41261;41262;41263;41264;41265;41266;41267;41268;45792;54337;54338;54339;54340;54341;54342;54343;54344;54345;54346;54347;54348;54349;54350;54351;54352;54353;54354;54355;54356;543…	21872;21873;21874;21875;21876;21877;21878;21879;21880;21881;21882;21883;21884;21885;21886;21887;21888;21889;21890;21891;26228;27073;44077;44078;44079;44080;44081;44082;44083;44084;44085;44086;44087;44088;44089;44090;44091;44092;44093;44094;44095;44096;44097;44098;44099;44100;44101;44102;49038;58133;58134;58135;58136;58137;58138;58139;58140;58141;58142;58143;58144;58145;58146;58147;58148;58149;581…	21887;26228;27073;44091;49038;58139;66738;85972;91332;114977	684;685	287;332
P08294;M0R1V4	P08294	7;1	7;1	7;1	Extracellular superoxide dismutase [Cu-Zn]	SOD3	Extracellular superoxide dismutase [Cu-Zn]	non matrisome	non matrisome	778985000	227780000	146220000	88507000	126860000	99321000	90297000		11	13	4	19	10	10	2	11	80				678	307;840;841;4289;6342;8405;8415	True;True;True;True;True;True;True	324;882;883;4562;6814;8998;8999;9009	2861;2862;2863;2864;2865;2866;2867;2868;2869;2870;2871;2872;2873;2874;2875;2876;2877;2878;2879;2880;9295;9296;9297;9298;9299;9300;9301;9302;9303;9304;9305;9306;55065;55066;55067;55068;55069;55070;79422;102766;102767;102768;102769;102770;102771;102772;102773;102774;102775;102776;102777;102778;102779;102780;102781;102782;102783;102784;102871;102872;102873;102874;102875;102876;102877;102878;102879;1…	2996;2997;2998;2999;3000;3001;3002;3003;3004;3005;3006;3007;3008;3009;3010;3011;3012;3013;3014;3015;3016;3017;3018;9795;9796;9797;9798;9799;9800;9801;9802;9803;9804;9805;9806;58896;58897;58898;58899;58900;58901;58902;84582;109444;109445;109446;109447;109448;109449;109450;109451;109452;109453;109454;109455;109456;109457;109458;109459;109460;109461;109462;109551;109552;109553;109554;109555;109556;1…	3004;9802;9805;58897;84582;109448;109553	322	50
E7EQR4;P15311;E9PQ82;E9PNV3;V9GZ54;P35241-3	E7EQR4;P15311	9;9;3;3;2;2	9;9;3;3;2;2	4;4;0;0;0;0	Ezrin	EZR	Isoform of P15311, Ezrin;Ezrin	non matrisome	non matrisome	180131000	0	47561000	0	43716000	51955000	36899000		2	7	2	9	5	5	1	7	38				297	564;1494;1801;2092;2128;3795;4505;6165;6326	True;True;True;True;True;True;True;True;True	595;1580;1909;2214;2250;4035;4789;6626;6798	6104;6105;6106;6107;6108;6109;6110;6111;6112;6113;6114;6115;6116;6117;6118;6119;6120;6121;6122;6123;6124;6125;18683;22534;25652;25653;25959;49535;49536;49537;57469;57470;57471;57472;57473;57474;76945;79207;79208	6412;6413;6414;6415;6416;6417;6418;6419;6420;6421;6422;6423;6424;6425;6426;6427;6428;6429;6430;6431;6432;6433;6434;20017;24149;27503;27504;27827;53075;53076;53077;61420;61421;61422;61423;61424;61425;81980;84352;84353	6422;20017;24149;27503;27827;53077;61421;81980;84352
Q9Y5B9	Q9Y5B9	5	5	5	FACT complex subunit SPT16	SUPT16H	FACT complex subunit SPT16	non matrisome	non matrisome	6894100	0	0	0	6894100	0	0		0	3	0	4	0	0	0	0	7				1274	1239;1701;2198;3968;6039	True;True;True;True;True	1311;1802;2323;4223;6489	15961;15962;21400;26731;26732;51707;75307	17108;17109;22938;28628;28629;55356;80206	17109;22938;28629;55356;80206
Q08945;A0A0U1RRK2;E9PMD4	Q08945;A0A0U1RRK2	4;2;1	4;2;1	4;2;1	FACT complex subunit SSRP1	SSRP1	FACT complex subunit SSRP1;Isoform of Q08945, FACT complex subunit SSRP1 (Fragment)	non matrisome	non matrisome	29793000	0	13832000	0	15961000	0	0		0	4	0	7	0	0	0	0	11				1032	158;234;4495;6688	True;True;True;True	168;248;4779;7180	1618;2049;57310;57311;57312;57313;83096;83097;83098;83099;83100	1698;2145;2146;61256;61257;61258;61259;88498;88499;88500;88501;88502	1698;2146;61258;88501
P52907;C9JUG7;F8W9N7;A0A0D9SET8;P47755-2;P47755	P52907;C9JUG7;F8W9N7;A0A0D9SET8;P47755-2;P47755	2;1;1;1;1;1	2;1;1;1;1;1	2;1;1;1;1;1	F-actin-capping protein subunit alpha-1;F-actin-capping protein subunit alpha-2	CAPZA1;CAPZA2	F-actin-capping protein subunit alpha-1;Isoform of P47755, F-actin-capping protein subunit alpha-2;Isoform of P47755, F-actin-capping protein subunit alpha-2;Isoform of P47755, F-actin-capping protein subunit alpha-2;Isoform of P47755, Isoform 2 of F-actin	non matrisome	non matrisome	10116000	0	0	0	10116000	0	0		0	0	0	2	0	0	0	0	2				911	2628;4727	True;True	2790;5017	31531;59699;59700	33658;63756;63757	33658;63757
P47756-2;P47756;B1AK87;B1AK88;B1AK85	P47756-2;P47756;B1AK87;B1AK88;B1AK85	8;8;7;7;6	8;8;7;7;6	8;8;7;7;6	F-actin-capping protein subunit beta	CAPZB	Isoform of P47756, Isoform 2 of F-actin-capping protein subunit beta;F-actin-capping protein subunit beta;Isoform of P47756, Capping protein (Actin filament) muscle Z-line, beta, isoform CRA_a;Isoform of P47756, Capping protein (Actin filament) muscle Z-li	non matrisome	non matrisome	169411000	0	46927000	0	64611000	0	57873000		0	6	1	10	2	1	1	6	27				877	1252;1720;2755;5129;6464;6701;6811;7121	True;True;True;True;True;True;True;True	1325;1823;2928;5450;6943;7195;7307;7308;7630	16014;16015;16016;16017;21638;32754;32755;32756;32757;32758;32759;32760;32761;32762;64453;64454;80726;83202;83203;83204;84061;84062;84063;84064;84065;84066;87640;87641;87642;87643;87644;87645;87646;87647;87648;87649;87650;87651;87652;87653;87654;87655	17164;17165;17166;17167;23199;34954;34955;34956;34957;34958;34959;34960;34961;34962;68710;68711;85940;88607;88608;88609;89541;89542;89543;89544;89545;89546;93325;93326;93327;93328;93329;93330;93331;93332;93333;93334;93335;93336;93337;93338;93339;93340	17166;23199;34962;68711;85940;88607;89544;93326	498	187
E9PEB5;Q96AE4;Q96AE4-2;C9JSZ1	E9PEB5;Q96AE4;Q96AE4-2	6;6;6;2	6;6;6;2	4;4;4;2	Far upstream element-binding protein 1	FUBP1	Isoform of Q96AE4, Far upstream element-binding protein 1;Far upstream element-binding protein 1;Isoform of Q96AE4, Isoform 2 of Far upstream element-binding protein 1	non matrisome	non matrisome	23773000	0	0	0	13426000	0	10347000		1	3	1	8	4	0	0	5	22				316	2110;2361;4015;4019;4027;8244	True;True;True;True;True;True	2232;2496;4273;4278;4287;8833	25813;28322;28323;28324;28325;28326;28327;28328;28329;28330;52230;52231;52276;52277;52342;52343;100881;100882;100883;100884;100885;100886	27675;30262;30263;30264;30265;30266;30267;30268;30269;30270;55930;55931;55979;55980;56046;56047;107398;107399;107400;107401;107402;107403	27675;30269;55931;55980;56047;107403
A0A087WTP3;Q92945;M0R0I5;M0QXW7;M0QYH3	A0A087WTP3;Q92945;M0R0I5	4;4;3;1;1	3;3;2;1;1	3;3;2;1;1	Far upstream element-binding protein 2	KHSRP	Isoform of Q92945, Far upstream element-binding protein 2;Far upstream element-binding protein 2;Isoform of Q92945, Far upstream element-binding protein 2 (Fragment)	non matrisome	non matrisome	0	0	0	0	0	0	0		0	1	1	1	1	0	0	0	4				19	1160;3862;4027;7171	True;True;False;True	1231;4109;4287;7683	15358;50472;50473;52342;52343;88465	16458;54052;54053;56046;56047;94218	16458;54053;56047;94218
J3QS89;Q7L5A8	J3QS89;Q7L5A8	1;1	1;1	1;1	Fatty acid 2-hydroxylase	FA2H	Isoform of Q7L5A8, Fatty acid 2-hydroxylase (Fragment);Fatty acid 2-hydroxylase	non matrisome	non matrisome	0	0	0	0	0	0	0		1	1	0	0	2	0	0	1	5				466	4508	TRUE	4792	57491;57492;57493;57494;57495	61442;61443;61444;61445;61446	61446
A0A0U1RQF0;P49327;A0A1B0GTR5;A0A0U1RRG3	A0A0U1RQF0;P49327	6;6;1;1	6;6;1;1	6;6;1;1	Fatty acid synthase;[Acyl-carrier-protein] S-acetyltransferase;[Acyl-carrier-protein] S-malonyltransferase;3-oxoacyl-[acyl-carrier-protein] synthase;3-oxoacyl-[acyl-carrier-protein] reductase;3-hydroxyacyl-[acyl-carrier-protein] dehydratase;Enoyl-[acyl-carrier-protein] reductase;Oleoyl-[acyl-carrier-protein] hydrolase	FASN	Isoform of P49327, Fatty acid synthase;Fatty acid synthase	non matrisome	non matrisome	10354000	0	0	0	10354000	0	0		0	0	0	5	0	0	0	0	5				126	49;3361;5289;6724;6778;8526	True;True;True;True;True;True	50;3575;5633;7218;7272;9131	445;44122;66543;83370;83706;104599	456;47221;70924;88793;89165;111348	456;47221;70924;88793;89165;111348
Q01469;I6L8B7;A8MUU1	Q01469	3;1;1	3;1;1	3;1;1	Fatty acid-binding protein, epidermal	FABP5	Fatty acid-binding protein, epidermal	non matrisome	non matrisome	26530000	15178000	0	0	0	11352000	0		4	1	3	3	2	1	3	1	18				1003	762;2053;7599	True;True;True	801;2174;8149	8348;8349;8350;8351;8352;8353;8354;8355;8356;8357;25362;25363;25364;25365;25366;25367;25368;93353;93354	8801;8802;8803;8804;8805;8806;8807;8808;8809;8810;27182;27183;27184;27185;27186;27187;27188;99470;99471	8801;27187;99470
Q6ZVX7	Q6ZVX7	1	1	1	F-box only protein 50	NCCRP1	F-box only protein 50	non matrisome	non matrisome	1995500	0	0	0	0	0	1995500		1	0	0	1	0	0	0	1	3				1131	7687	TRUE	8245	94529;94530;94531	100709;100710;100711	100711
H0YJ34;Q96AC1-2;Q96AC1;Q96AC1-3;A0A0U1RRM8;G3V5R2;G3V281;G3V3J0;G3V1L6;Q9BQL6-4;Q9BQL6-2;Q9BQL6	H0YJ34;Q96AC1-2;Q96AC1;Q96AC1-3;A0A0U1RRM8	5;5;5;5;3;2;2;1;1;1;1;1	5;5;5;5;3;2;2;1;1;1;1;1	5;5;5;5;3;2;2;1;1;1;1;1	Fermitin family homolog 2	FERMT2	Isoform of Q96AC1, Fermitin family homolog 2 (Fragment);Isoform of Q96AC1, Isoform 2 of Fermitin family homolog 2;Fermitin family homolog 2;Isoform of Q96AC1, Isoform 3 of Fermitin family homolog 2;Isoform of Q96AC1, Fermitin family homolog 2 (Fragment)	non matrisome	non matrisome	39275000	0	0	0	21892000	0	17383000		0	1	0	5	1	1	0	6	14				415	1867;2740;3546;8695;8891	True;True;True;True;True	1976;1977;2911;3770;9303;9507	22944;22945;22946;32614;32615;46397;106459;106460;106461;108752;108753;108754;108755;108756	24565;24566;24567;34806;34807;49707;113296;113297;113298;115717;115718;115719;115720;115721	24566;34806;49707;113296;115719	172	374
P35555;H0YND0;F6U495	P35555	128;28;10	128;28;10	122;27;8	Fibrillin-1	FBN1	Fibrillin-1	Core matrisome	ECM Glycoproteins	896910000000	152320000000	161660000000	126720000000	124080000000	113970000000	218160000000		606	1068	681	900	1082	852	862	1094	7145				840	94;346;347;670;728;847;848;872;873;904;918;926;927;928;929;930;933;974;975;978;982;995;996;1000;1044;1045;1048;1051;1052;1053;1058;1071;1086;1092;1132;1134;1135;1147;1148;1392;1420;1957;1958;2002;2638;2786;2817;2828;2904;2905;2910;2917;2918;2924;2980;3149;3191;3221;3272;3308;3318;3340;3407;3426;3427;3449;3573;3579;3817;3886;4094;4484;4485;4770;4818;5274;5280;5327;5360;5387;5435;5440;5441;5446;549…	True;True;True;True;True;True;True;True;True;True;True;True;True;True;True;True;True;True;True;True;True;True;True;True;True;True;True;True;True;True;True;True;True;True;True;True;True;True;True;True;True;True;True;True;True;True;True;True;True;True;True;True;True;True;True;True;True;True;True;True;True;True;True;True;True;True;True;True;True;True;True;True;True;True;True;True;True;True;True;True…	99;364;365;708;766;889;890;891;892;918;919;951;952;953;954;968;976;977;978;979;980;981;984;1028;1029;1032;1036;1049;1050;1054;1055;1056;1105;1106;1109;1112;1113;1114;1120;1121;1135;1150;1158;1201;1203;1204;1216;1217;1218;1219;1471;1472;1500;2067;2068;2069;2070;2120;2121;2801;2962;2996;3008;3093;3094;3099;3100;3108;3109;3115;3173;3350;3351;3396;3428;3479;3480;3518;3530;3554;3625;3645;3646;3668;379…	852;853;854;855;856;857;858;859;860;861;862;863;864;3292;3293;3294;3295;3296;3297;3298;3299;3300;3301;3302;3303;3304;3305;3306;3307;3308;3309;3310;3311;3312;3313;3314;3315;3316;3317;3318;3319;3320;3321;3322;3323;3324;3325;3326;3327;3328;3329;3330;3331;3332;3333;3334;3335;3336;3337;3338;3339;3340;3341;3342;3343;3344;3345;3346;3347;3348;3349;3350;3351;3352;3353;3354;3355;3356;3357;3358;3359;3360;33…
A0A087WYV8;P35556;D6RJI3;P35556-2;E9PHW4;D6REJ2	A0A087WYV8;P35556;D6RJI3;P35556-2	23;23;14;14;5;2	17;17;10;10;1;2	17;17;10;10;1;2	Fibrillin-2	FBN2	Isoform of P35556, Fibrillin-2;Fibrillin-2;Isoform of P35556, Fibrillin-2;Isoform of P35556, Isoform 2 of Fibrillin-2	Core matrisome	ECM Glycoproteins	2835860000	810350000	341740000	1261200000	263450000	159120000	0		11	9	34	9	9	4	7	5	88				44	782;940;957;1001;1146;1419;2904;3191;3317;3442;3673;4662;5050;5361;5439;5773;5804;5807;6118;6400;7461;7497;7820	True;True;True;True;True;True;False;False;True;True;True;True;True;True;True;True;True;False;True;False;True;False;False	822;991;1010;1057;1058;1215;1499;3093;3396;3529;3661;3908;4952;5366;5737;5839;6207;6238;6241;6576;6876;7997;8039;8386;8387	8552;8553;11044;11045;11046;11047;11048;11049;11332;11333;12563;12564;12565;14995;14996;14997;14998;14999;17761;17762;17763;17764;17765;35862;35863;35864;35865;35866;35867;35868;35869;35870;35871;35872;35873;35874;35875;35876;35877;35878;35879;35880;35881;35882;35883;35884;35885;35886;35887;35888;35889;35890;35891;35892;35893;35894;35895;35896;35897;35898;35899;35900;35901;35902;41095;41096;41097…	9010;9011;11670;11671;11672;11673;11674;11675;11982;11983;13288;13289;13290;16073;16074;16075;16076;16077;18998;18999;19000;19001;19002;19003;38327;38328;38329;38330;38331;38332;38333;38334;38335;38336;38337;38338;38339;38340;38341;38342;38343;38344;38345;38346;38347;38348;38349;38350;38351;38352;38353;38354;38355;38356;38357;38358;38359;38360;38361;38362;38363;38364;38365;38366;38367;38368;38369…	9011;11675;11983;13290;16073;18998;38365;43988;46586;48332;51582;63065;67955;71865;72854;77334;77876;77964;81255;85214;97745;98411;102401	14;15;16;17	385;701;1317;1319
P02671-2;P02671;A0A087WUA0;CON__P02672	P02671-2;P02671	30;30;11;1	30;30;11;1	30;30;11;1	Fibrinogen alpha chain;Fibrinopeptide A;Fibrinogen alpha chain	FGA	Isoform of P02671, Isoform 2 of Fibrinogen alpha chain;Fibrinogen alpha chain	Core matrisome	ECM Glycoproteins	10198000000	1303400000	787900000	534230000	2134100000	4524000000	914370000		30	53	24	74	78	108	82	54	503				609	516;624;1452;1585;1594;2221;2312;2771;2772;2978;2979;3076;3077;3269;3543;3572;5294;5330;5629;5640;5641;5673;5825;5958;6117;6163;6447;7350;7688;8289	True;True;True;True;True;True;True;True;True;True;True;True;True;True;True;True;True;True;True;True;True;True;True;True;True;True;True;True;True;True	540;541;659;660;1533;1675;1685;1686;2349;2445;2446;2944;2945;3171;3172;3271;3272;3476;3767;3798;5638;5639;5688;5689;6052;6063;6064;6098;6260;6398;6575;6624;6926;7880;7881;8246;8879	5549;5550;5551;5552;5553;5554;5555;5556;5557;5558;5559;5560;5561;5562;5563;5564;5565;5566;5567;5568;5569;5570;5571;5572;5573;6854;6855;6856;6857;6858;6859;6860;6861;6862;6863;6864;6865;6866;6867;6868;6869;6870;18005;18006;18007;19916;19917;19918;19919;19920;19921;19922;19923;19924;19925;19926;19989;19990;19991;19992;19993;19994;19995;19996;19997;19998;19999;20000;20001;20002;20003;20004;20005;200…	5846;5847;5848;5849;5850;5851;5852;5853;5854;5855;5856;5857;5858;5859;5860;5861;5862;5863;5864;5865;5866;5867;5868;5869;5870;7228;7229;7230;7231;7232;7233;7234;7235;7236;7237;7238;7239;7240;7241;7242;7243;7244;19249;19250;19251;21391;21392;21393;21394;21395;21396;21397;21398;21399;21400;21401;21465;21466;21467;21468;21469;21470;21471;21472;21473;21474;21475;21476;21477;21478;21479;21480;21481;214…	5860;7231;19251;21398;21525;28869;29708;35077;35080;40123;40137;41255;41290;45912;49665;50053;70964;71414;75727;75799;75805;76247;78088;79384;81230;81955;85715;96316;100715;108186	256;257;258;259;260;261;262	110;166;226;257;259;495;536
P02675;D6REL8;CON__P02676	P02675;D6REL8	25;16;5	25;16;5	25;16;5	Fibrinogen beta chain;Fibrinopeptide B;Fibrinogen beta chain	FGB	Fibrinogen beta chain;Isoform of P02675, Fibrinogen beta chain	Core matrisome	ECM Glycoproteins	7781430000	697350000	477390000	0	1565100000	4681100000	360490000		11	39	6	71	61	110	78	23	399				610	370;563;1500;1789;1805;1834;2947;3305;3502;3562;4051;4480;5316;5684;5732;5754;6030;6031;6093;6357;6857;7561;8537;8817;8893	True;True;True;True;True;True;True;True;True;True;True;True;True;True;True;True;True;True;True;True;True;True;True;True;True	388;594;1586;1896;1913;1942;3139;3140;3514;3515;3724;3725;3788;4311;4763;4764;5668;5669;5670;6110;6111;6164;6187;6480;6481;6549;6829;7356;8111;9142;9431;9509;9510	3869;3870;3871;3872;3873;3874;3875;3876;3877;3878;3879;3880;3881;3882;3883;3884;3885;3886;3887;3888;3889;3890;3891;3892;3893;3894;3895;3896;3897;3898;6081;6082;6083;6084;6085;6086;6087;6088;6089;6090;6091;6092;6093;6094;6095;6096;6097;6098;6099;6100;6101;6102;6103;18746;18747;18748;18749;18750;18751;18752;18753;18754;18755;18756;18757;18758;18759;18760;18761;18762;18763;22344;22345;22346;22347;22…	4088;4089;4090;4091;4092;4093;4094;4095;4096;4097;4098;4099;4100;4101;4102;4103;4104;4105;4106;4107;4108;4109;4110;4111;4112;4113;4114;4115;4116;4117;4118;6389;6390;6391;6392;6393;6394;6395;6396;6397;6398;6399;6400;6401;6402;6403;6404;6405;6406;6407;6408;6409;6410;6411;20084;20085;20086;20087;20088;20089;20090;20091;20092;20093;20094;20095;20096;20097;20098;20099;20100;20101;23947;23948;23949;239…	4107;6399;20089;23947;24194;24420;39601;46384;49288;50014;56408;61085;71175;76365;76867;77096;80092;80102;80841;84798;90236;99115;111417;114951;115764	263;264;265;266;267;268;269;270	148;220;254;335;344;456;468;477
C9JEU5;C9JC84;P02679-2;P02679;C9JPQ9;C9JU00	C9JEU5;C9JC84;P02679-2;P02679	22;22;22;22;6;6	22;22;22;22;6;6	22;22;22;22;6;6	Fibrinogen gamma chain	FGG	Isoform of P02679, Fibrinogen gamma chain;Isoform of P02679, Fibrinogen gamma chain;Isoform of P02679, Isoform Gamma-A of Fibrinogen gamma chain;Fibrinogen gamma chain	Core matrisome	ECM Glycoproteins	13108910000	1211100000	974740000	330700000	2932400000	7011200000	648770000		34	56	11	94	67	120	101	40	523				212	399;712;969;1495;1654;1920;2400;2429;2453;3833;4395;5080;5115;5334;5904;6241;6440;7633;7782;7888;8642;8763	True;True;True;True;True;True;True;True;True;True;True;True;True;True;True;True;True;True;True;True;True;True	418;750;1023;1581;1749;2030;2537;2538;2571;2572;2600;4079;4673;5400;5436;5695;5696;5697;6341;6342;6708;6919;8185;8186;8346;8458;9250;9373	4099;4100;4101;4102;4103;4104;4105;4106;4107;4108;4109;4110;4111;4112;4113;4114;4115;4116;4117;4118;4119;4120;4121;4122;4123;4124;4125;4126;4127;7824;7825;7826;7827;7828;7829;7830;7831;7832;7833;7834;7835;7836;7837;7838;7839;7840;7841;7842;7843;7844;7845;7846;7847;7848;7849;11559;11560;11561;11562;11563;11564;11565;11566;11567;11568;11569;11570;11571;11572;11573;11574;11575;11576;11577;18684;1868…	4323;4324;4325;4326;4327;4328;4329;4330;4331;4332;4333;4334;4335;4336;4337;4338;4339;4340;4341;4342;4343;4344;4345;4346;4347;4348;4349;4350;4351;4352;8249;8250;8251;8252;8253;8254;8255;8256;8257;8258;8259;8260;8261;8262;8263;8264;8265;8266;8267;8268;8269;8270;8271;8272;8273;8274;12218;12219;12220;12221;12222;12223;12224;12225;12226;12227;12228;12229;12230;12231;12232;12233;12234;12235;12236;12237…	4348;8264;12231;20022;22307;25034;30805;31276;31576;53709;60170;68208;68564;71462;78946;83034;85621;99950;101898;103098;112553;114089	86;87;88;89;90;91	104;115;120;298;344;370
H0YNE7;P21781	H0YNE7;P21781	4;4	4;4	4;4	Fibroblast growth factor;Fibroblast growth factor 7	FGF7	Isoform of P21781, Fibroblast growth factor (Fragment);Fibroblast growth factor 7	Matrisome-associated	Secreted Factors	419513000	0	139220000	0	127160000	108710000	44423000		1	10	6	11	11	9	3	5	56				423	2060;3365;5621;7678	True;True;True;True	2181;3579;3580;6044;8236	25422;25423;25424;25425;25426;25427;44131;44132;44133;44134;44135;44136;44137;44138;44139;44140;44141;44142;44143;44144;44145;44146;44147;44148;44149;44150;44151;44152;44153;44154;44155;70984;94362;94363;94364;94365;94366;94367;94368;94369;94370;94371;94372;94373;94374;94375;94376;94377;94378;94379;94380;94381;94382;94383;94384;94385;94386;94387;94388	27243;27244;27245;27246;27247;27248;47231;47232;47233;47234;47235;47236;47237;47238;47239;47240;47241;47242;47243;47244;47245;47246;47247;47248;47249;47250;47251;47252;47253;47254;47255;47256;47257;75641;100520;100521;100522;100523;100524;100525;100526;100527;100528;100529;100530;100531;100532;100533;100534;100535;100536;100537;100538;100539;100540;100541;100542;100543;100544;100545;100546	27247;47244;75641;100520	173;174	40;63
Q06828	Q06828	7	7	7	Fibromodulin	FMOD	Fibromodulin	Core matrisome	Proteoglycans	177026000	0	0	0	63236000	113790000	0		1	2	0	8	1	17	12	2	43				1020	2055;3995;5356;6542;6924;6925;8762	True;True;True;True;True;True;True	2176;4252;5730;7025;7026;7425;7426;9372	25379;25380;25381;25382;25383;25384;51998;51999;52000;52001;52002;52003;52004;52005;52006;52007;52008;52009;52010;52011;67301;81405;81406;81407;81408;81409;81410;85333;85334;85335;107175;107176;107177;107178;107179;107180;107181;107182;107183;107184;107185;107186;107187	27199;27200;27201;27202;27203;27204;27205;55676;55677;55678;55679;55680;55681;55682;55683;55684;55685;55686;55687;55688;55689;71728;86679;86680;86681;86682;86683;86684;90883;90884;90885;114043;114044;114045;114046;114047;114048;114049;114050;114051;114052;114053;114054;114055;114056	27201;55687;71728;86682;90883;90885;114047	625	360
J3KNQ2;Q4ZHG4-2;Q4ZHG4	J3KNQ2;Q4ZHG4-2;Q4ZHG4	2;2;2	2;2;2	2;2;2	Fibronectin type III domain-containing protein 1	FNDC1	Isoform of Q4ZHG4, Fibronectin type III domain-containing protein 1 (Fragment);Isoform of Q4ZHG4, Isoform 2 of Fibronectin type III domain-containing protein 1;Fibronectin type III domain-containing protein 1	Core matrisome	ECM Glycoproteins	0	0	0	0	0	0	0		0	0	0	1	0	3	2	0	6				448	2657;4216	True;True	2822;4487	31796;31797;31798;54556;54557;54558	33928;33929;33930;58358;58359;58360	33929;58359
P02751-3;P02751;P02751-17;P02751-7;P02751-15;P02751-6;P02751-5;P02751-14;P02751-8;P02751-10;P02751-9;P02751-11;P02751-13;P02751-12;P02751-4;H0Y7Z1;P02751-16;P02751-2;H0Y4K8	P02751-3;P02751;P02751-17;P02751-7;P02751-15;P02751-6;P02751-5;P02751-14;P02751-8;P02751-10;P02751-9;P02751-11;P02751-13;P02751-12;P02751-4	86;86;85;85;85;84;84;84;84;83;83;83;82;76;76;35;28;26;4	86;86;85;85;85;84;84;84;84;83;83;83;82;76;76;35;28;26;4	86;86;85;85;85;84;84;84;84;83;83;83;82;76;76;35;28;26;4	Fibronectin;Anastellin;Ugl-Y1;Ugl-Y2;Ugl-Y3	FN1	Isoform of P02751, Isoform 3 of Fibronectin;Fibronectin;Isoform of P02751, Isoform 17 of Fibronectin;Isoform of P02751, Isoform 7 of Fibronectin;Isoform of P02751, Isoform 15 of Fibronectin;Isoform of P02751, Isoform 6 of Fibronectin;Isoform of P02751, Iso	Core matrisome	ECM Glycoproteins	39928900000	4146400000	6439800000	4018000000	6766500000	14370000000	4188200000		80	291	75	267	354	377	188	211	1843				617	85;617;744;913;914;954;1105;1331;1464;1600;1638;1639;1776;1865;2000;2227;2322;2439;2477;2631;2636;2876;2912;3043;3144;3145;3249;3602;3626;3668;3786;3788;4060;4130;4152;4218;4585;4664;5109;5580;5670;5689;5779;5828;5829;5846;5889;5937;5980;6029;6090;6115;6306;6507;6509;6706;6747;7090;7101;7132;7200;7276;7305;7325;7368;7551;7733;7736;7864;7865;7914;7961;8254;8401;8420;8421;8451;8519;8566;8567;8591;8…	True;True;True;True;True;True;True;True;True;True;True;True;True;True;True;True;True;True;True;True;True;True;True;True;True;True;True;True;True;True;True;True;True;True;True;True;True;True;True;True;True;True;True;True;True;True;True;True;True;True;True;True;True;True;True;True;True;True;True;True;True;True;True;True;True;True;True;True;True;True;True;True;True;True;True;True;True;True;True;True…	90;652;783;963;964;1007;1174;1409;1545;1693;1694;1733;1734;1883;1974;2117;2118;2355;2456;2583;2584;2585;2625;2793;2794;2799;3063;3103;3237;3345;3346;3456;3835;3861;3903;4026;4028;4320;4397;4419;4489;4872;4954;5430;5995;6094;6117;6213;6263;6264;6281;6325;6376;6377;6421;6422;6423;6479;6544;6545;6546;6573;6778;6989;6991;6992;7200;7241;7597;7608;7642;7716;7799;7831;7832;7853;7900;8101;8294;8297;8433;…	797;798;799;800;6744;6745;6746;6747;6748;6749;6750;6751;6752;6753;6754;6755;8174;8175;8176;8177;8178;8179;8180;8181;8182;8183;8184;8185;8186;8187;8188;8189;8190;8191;8192;8193;8194;8195;8196;8197;8198;10379;10380;10381;10382;10383;10384;10385;10386;10387;10388;10389;10390;10391;10392;10393;10394;10395;10396;10397;10398;10399;10400;10401;10402;10403;11262;11263;11264;11265;11266;11267;11268;11269;…	833;834;835;836;7116;7117;7118;7119;7120;7121;7122;7123;7124;7125;7126;7127;8621;8622;8623;8624;8625;8626;8627;8628;8629;8630;8631;8632;8633;8634;8635;8636;8637;8638;8639;8640;8641;8642;8643;8644;8645;10955;10956;10957;10958;10959;10960;10961;10962;10963;10964;10965;10966;10967;10968;10969;10970;10971;10972;10973;10974;10975;10976;10977;10978;10979;10980;10981;10982;10983;10984;10985;11902;11903;…	834;7125;8631;10964;10970;11936;15598;18143;19580;21601;22094;22138;23849;24557;26461;28934;29833;31394;31831;33689;33753;38004;38693;40735;42200;42211;45512;50787;51031;51570;52976;52991;56451;57387;57595;58369;62169;63085;68505;75062;76170;76399;77377;78098;78125;78290;78825;79308;79542;80083;80803;81178;84069;86418;86426;88683;88915;92766;92902;93536;94588;95682;95918;96100;96596;99040;101319;…	271;272;273;274;275;276;277;278;279;280;281;282	119;164;209;210;463;477;926;1283;1548;1783;2242;2243
P23142;P23142-2;P23142-3;CON__ENSEMBL:ENSBTAP00000016046;B1AHM7;H7C1M6;B1AHM9;B1AHM8;B1AHN3;B1AHM6;A0A0U1RRA4	P23142;P23142-2;P23142-3;CON__ENSEMBL:ENSBTAP00000016046	30;20;20;15;7;7;7;5;4;2;1	30;20;20;15;7;7;7;5;4;2;1	10;0;0;7;0;0;0;0;0;0;1	Fibulin-1	FBLN1	Fibulin-1;Isoform of P23142, Isoform A of Fibulin-1;Isoform of P23142, Isoform B of Fibulin-1;	Core matrisome	ECM Glycoproteins	21860400000	2408400000	4988700000	4981700000	2652700000	2497800000	4331100000		37	142	68	98	121	97	85	134	782			+	779	410;891;987;988;1066;1128;1133;1211;1373;1586;1605;1902;3425;3433;3850;3851;4463;5278;5279;5404;5849;6293;6331;6416;6613;6619;6668;7023;7414;8780	True;True;True;True;True;True;True;True;True;True;True;True;True;True;True;True;True;True;True;True;True;True;True;True;True;True;True;True;True;True	430;937;1041;1042;1130;1197;1202;1282;1452;1676;1699;2012;3644;3652;4097;4098;4743;4744;5613;5614;5615;5616;5795;5796;6284;6765;6803;6893;7099;7100;7101;7107;7160;7527;7947;9390;9391;9392	4233;4234;4235;4236;4237;4238;4239;4240;4241;4242;4243;4244;4245;4246;4247;4248;4249;4250;4251;4252;4253;4254;4255;4256;9950;9951;9952;9953;9954;9955;9956;9957;9958;9959;9960;9961;9962;9963;9964;9965;9966;9967;9968;9969;9970;9971;9972;9973;9974;9975;11957;11958;11959;11960;11961;11962;11963;11964;11965;11966;11967;11968;11969;11970;11971;11972;11973;11974;11975;11976;11977;11978;11979;11980;11981…	4461;4462;4463;4464;4465;4466;4467;4468;4469;4470;4471;4472;4473;4474;4475;4476;4477;4478;4479;4480;4481;4482;4483;4484;4485;10498;10499;10500;10501;10502;10503;10504;10505;10506;10507;10508;10509;10510;10511;10512;10513;10514;10515;10516;10517;10518;10519;10520;10521;10522;10523;12648;12649;12650;12651;12652;12653;12654;12655;12656;12657;12658;12659;12660;12661;12662;12663;12664;12665;12666;1266…	4475;10510;12653;12715;14795;15794;15935;16802;18574;21414;21694;24888;47988;48195;53942;53944;60820;70754;70797;72402;78370;83993;84367;85320;87704;87786;88373;91983;97294;114361	409;410;411;412;413	63;396;652;655;678
P23142-4;B1AHL2	P23142-4;B1AHL2	26;25	6;6	6;6	Fibulin-1	FBLN1	Isoform of P23142, Isoform C of Fibulin-1;Isoform of P23142, Fibulin-1	Core matrisome	ECM Glycoproteins	3168270000	346810000	863180000	657750000	418580000	390620000	491330000		4	29	9	16	10	12	10	20	110				780	891;987;988;1066;1128;1133;1211;1373;1450;1605;3425;3433;3503;3850;3851;4155;5278;5279;5314;5315;5404;6331;6416;7023;7414;8362	False;False;False;False;False;False;False;False;True;False;False;False;True;False;False;True;False;False;True;True;False;False;False;False;False;True	937;1041;1042;1130;1197;1202;1282;1452;1531;1699;3644;3652;3726;4097;4098;4422;5613;5614;5615;5616;5664;5665;5666;5667;5795;5796;6803;6893;7527;7947;8954	9950;9951;9952;9953;9954;9955;9956;9957;9958;9959;9960;9961;9962;9963;9964;9965;9966;9967;9968;9969;9970;9971;9972;9973;9974;9975;11957;11958;11959;11960;11961;11962;11963;11964;11965;11966;11967;11968;11969;11970;11971;11972;11973;11974;11975;11976;11977;11978;11979;11980;11981;11982;11983;11984;11985;11986;11987;11988;11989;11990;11991;11992;11993;11994;11995;11996;11997;11998;11999;12000;12001…	10498;10499;10500;10501;10502;10503;10504;10505;10506;10507;10508;10509;10510;10511;10512;10513;10514;10515;10516;10517;10518;10519;10520;10521;10522;10523;12648;12649;12650;12651;12652;12653;12654;12655;12656;12657;12658;12659;12660;12661;12662;12663;12664;12665;12666;12667;12668;12669;12670;12671;12672;12673;12674;12675;12676;12677;12678;12679;12680;12681;12682;12683;12684;12685;12686;12687;126…	10510;12653;12715;14795;15794;15935;16802;18574;19220;21694;47988;48195;49323;53942;53944;57631;70754;70797;71112;71137;72402;84367;85320;91983;97294;109013	410;411;414;415	63;396;606;617
P98095-2;P98095;H7BXL0;H7C1A3	P98095-2;P98095	32;31;2;1	32;31;2;1	32;31;2;1	Fibulin-2	FBLN2	Isoform of P98095, Isoform 2 of Fibulin-2;Fibulin-2	Core matrisome	ECM Glycoproteins	21508000000	1854900000	7319900000	5088600000	2414200000	2301000000	2529400000		36	145	80	85	87	86	49	86	654				997	301;513;959;1083;1127;1129;1258;1302;1660;1916;2390;2744;3136;3137;3275;3812;4132;4810;5318;5634;6013;6108;6113;6336;6459;6510;6601;6662;6721;7255;7642;8304	True;True;True;True;True;True;True;True;True;True;True;True;True;True;True;True;True;True;True;True;True;True;True;True;True;True;True;True;True;True;True;True	318;537;1012;1147;1196;1198;1331;1332;1379;1380;1756;2026;2527;2915;3337;3338;3483;4054;4399;5110;5672;5673;6057;6458;6566;6571;6808;6938;6993;7087;7153;7154;7215;7777;8195;8895	2800;2801;2802;2803;2804;2805;2806;2807;2808;2809;2810;2811;2812;2813;2814;2815;2816;2817;2818;2819;2820;2821;5535;5536;5537;5538;11356;11357;11358;11359;11360;11361;11362;11363;11364;11365;11366;11367;11368;11369;11370;11371;11372;11373;11374;11375;11376;11377;11378;11379;11380;11381;11382;11383;14139;14140;14141;14142;14143;14144;14145;14146;14147;14148;14149;14150;14151;14152;14153;14154;14155…	2935;2936;2937;2938;2939;2940;2941;2942;2943;2944;2945;2946;2947;2948;2949;2950;2951;2952;2953;2954;2955;2956;5831;5832;5833;5834;12006;12007;12008;12009;12010;12011;12012;12013;12014;12015;12016;12017;12018;12019;12020;12021;12022;12023;12024;12025;12026;12027;12028;12029;12030;12031;12032;12033;15094;15095;15096;15097;15098;15099;15100;15101;15102;15103;15104;15105;15106;15107;15108;15109;15110…	2947;5831;12010;15095;15788;15815;17247;17764;22358;24944;30664;34817;42126;42143;46040;53250;57401;64923;71189;75753;79911;81079;81157;84459;85885;86438;87537;88315;88787;95371;100053;108414	571;572;573;574;575	490;549;817;1207;1222
G3V4U0;Q9UBX5;G3XA98;G3V3Y2	G3V4U0;Q9UBX5;G3XA98	19;19;18;3	19;19;18;3	19;19;18;3	Fibulin-5	FBLN5	Isoform of Q9UBX5, Fibulin-5;Fibulin-5;Isoform of Q9UBX5, Fibulin 5, isoform CRA_a	Core matrisome	ECM Glycoproteins	32134600000	6493900000	3933300000	7521500000	2245800000	2901600000	9038500000		54	85	80	60	70	74	98	122	643				388	935;976;1020;1021;1487;1545;1546;2785;3219;4224;4965;6242;6261;6262;6666;7161;7162;7443;8799	True;True;True;True;True;True;True;True;True;True;True;True;True;True;True;True;True;True;True	986;1030;1077;1078;1079;1080;1571;1572;1633;1634;1635;2959;2960;2961;3425;4495;5279;6709;6728;6729;6730;6731;7158;7671;7672;7673;7976;9412	10985;10986;10987;10988;10989;10990;10991;10992;10993;10994;10995;10996;10997;11772;11773;11774;11775;11776;11777;11778;11779;11780;11781;11782;11783;11784;11785;11786;11787;11788;11789;11790;11791;11792;11793;11794;11795;11796;11797;11798;11799;11800;11801;11802;11803;11804;11805;11806;11807;11808;11809;11810;11811;11812;11813;11814;11815;11816;11817;11818;11819;11820;11821;11822;11823;11824;118…	11607;11608;11609;11610;11611;11612;11613;11614;11615;11616;11617;11618;11619;11620;12454;12455;12456;12457;12458;12459;12460;12461;12462;12463;12464;12465;12466;12467;12468;12469;12470;12471;12472;12473;12474;12475;12476;12477;12478;12479;12480;12481;12482;12483;12484;12485;12486;12487;12488;12489;12490;12491;12492;12493;12494;12495;12496;12497;12498;12499;12500;12501;12502;12503;12504;12505;125…	11612;12485;13597;13650;19979;20922;20973;35206;44654;58436;66948;83040;83352;83456;88361;93971;94012;97603;114650	159;160;161;162;163;164	62;63;338;358;373;411
Q53RD9-4;Q53RD9-2;Q53RD9;Q8IY13;H7BZ65;Q53RD9-3;B8ZZC1	Q53RD9-4;Q53RD9-2;Q53RD9;Q8IY13;H7BZ65;Q53RD9-3	3;3;3;2;2;2;1	3;3;3;2;2;2;1	3;3;3;2;2;2;1	Fibulin-7	FBLN7	Isoform of Q53RD9, Isoform 4 of Fibulin-7;Isoform of Q53RD9, Isoform 2 of Fibulin-7;Fibulin-7;Isoform of Q53RD9, FBLN7 protein (Fragment);Isoform of Q53RD9, Fibulin-7 (Fragment);Isoform of Q53RD9, Isoform 3 of Fibulin-7	Core matrisome	ECM Glycoproteins	0	0	0	0	0	0	0		0	2	1	3	7	1	0	0	14				1098	6183;7448;7573	True;True;True	6644;7981;8123	77120;77121;77122;77123;77124;77125;77126;77127;77128;91624;93121;93122;93123;93124	82167;82168;82169;82170;82171;82172;82173;82174;82175;97632;99217;99218;99219;99220	82175;97632;99217
CON__P20930;P20930	CON__P20930;P20930	1;1	1;1	1;1	Filaggrin	FLG	;Filaggrin	Matrisome-associated	Secreted Factors	15547000	0	0	0	0	15547000	0		0	0	0	0	1	2	2	1	6			+	251	3436	TRUE	3655	45083;45084;45085;45086;45087;45088	48289;48290;48291;48292;48293;48294	48291
CON__Q5D862;Q5D862	CON__Q5D862;Q5D862	5;5	5;5	5;5	Filaggrin-2	FLG2	;Filaggrin-2	Matrisome-associated	Secreted Factors	169750000	0	0	169750000	0	0	0		4	2	4	4	3	1	4	5	27			+	257	2057;2593;6028;6207;7178	True;True;True;True;True	2178;2749;6478;6670;7690	25396;25397;25398;31103;75173;75174;75175;75176;77484;77485;77486;77487;77488;77489;88514;88515;88516;88517;88518;88519;88520;88521;88522;88523;88524;88525;88526;88527	27217;27218;27219;33206;80070;80071;80072;80073;82546;82547;82548;82549;82550;82551;94268;94269;94270;94271;94272;94273;94274;94275;94276;94277;94278;94279;94280;94281	27219;33206;80070;82550;94270
[truncated: 831 more rows]

## Sheet: All protein
Protein names	Gene names	Fasta headers	division	category	LFQ sum all exp	LFQ intensity H1	LFQ intensity H2	LFQ intensity H3	LFQ intensity SF1	LFQ intensity SF2	LFQ intensity SF3	LFQ intensity normal (with SF2)	LFQ intensity normal (with SF3)		Protein names	Gene names	Fasta headers	division	category	LFQ sum all exp	LFQ intensity H1	LFQ intensity H2	LFQ intensity H3	LFQ intensity SF1	LFQ intensity SF2	LFQ intensity SF3				LFQ sum all exp	LFQ intensity H1	LFQ intensity H2	LFQ intensity H3	LFQ intensity SF1	LFQ intensity SF2	LFQ intensity SF3			Gene names	Fasta headers	division	category	LFQ sum all exp	LFQ intensity H1	LFQ intensity H2	LFQ intensity H3		Gene names	Fasta headers
[truncated: 1,252 more rows]
[truncated: 6 more columns]

[truncated: 9 more sheets: Matrisome, Collagen, col isoforms, Glyco, Proteo, Reg, Aff, SF, Heatmap]
